# Supplementary material for: Whole-genome analysis informs breast cancer response to aromatase inhibition
Source: Springer Nature journal article supplement (doi:10.1038/nature11143), 2012-06-01
Supplement: 41586_2012_BFnature11143_MOESM306_ESM.pdf [file 41586_2012_BFnature11143_MOESM306_ESM.pdf]

## Supplementary Information for Whole Genome Sequencing to Characterise Breast Cancer Response to Aromatase Inhibitors.

Matthew J. Ellis<sup>1,2, 5\*#</sup>, Li Ding<sup>3,4\*#</sup>, Dong Shen<sup>3,4\*</sup>, Jingqin Luo<sup>5,6</sup>, Vera J. Suman<sup>7</sup>, John W. Wallis<sup>3,4</sup>, Brian A. Van Tine<sup>1</sup>, Jeremy Hoog<sup>1</sup>, Reece J. Goiffon<sup>9,17,18</sup>, Theodore C. Goldstein<sup>24</sup>, Sam Ng<sup>24</sup>, Li Lin<sup>1</sup>, Robert Crowder<sup>1</sup>, Jacqueline Snider<sup>1</sup>, Karla Ballman<sup>7</sup>, Jason Weber<sup>1,8,9</sup>, Ken Chen<sup>3,4</sup>, Daniel C. Koboldt<sup>3,4</sup>, Cyriac Kandoth<sup>3,4</sup>, William S. Schierding<sup>3,4</sup>, Joshua F. McMichael<sup>3,4</sup>, Christopher A. Miller<sup>3,4</sup>, Charles Lu<sup>3,4</sup>, Christopher C. Harris<sup>3,4</sup>, Michael D. McLellan<sup>3,4</sup>, Michael C. Wendl<sup>3,4</sup>, Katherine DeSchryver<sup>1</sup>, D. Craig Allred<sup>5,10</sup>, Laura Esserman<sup>11</sup>, Gary Unzeitig<sup>12</sup>, Julie Margenthaler<sup>2</sup>, G.V. Babiera<sup>13</sup>, P. Kelly Marcom<sup>14</sup>, J.M. Guenther<sup>15</sup>, Marilyn Leitch<sup>16</sup>, Kelly Hunt<sup>13</sup>, John Olson<sup>14</sup>, Yu Tao<sup>6</sup>, Chris Maher<sup>1,2</sup>, Lucinda L. Fulton<sup>3,4</sup>, Robert S. Fulton<sup>3,4</sup>, Michelle Harrison<sup>3,4</sup>, Ben Oberkfell<sup>3,4</sup>, Feiyu Du<sup>3,4</sup>, Ryan Demeter<sup>3,4</sup>, Tammi L. Vickery<sup>3,4</sup>, Adnan Elhammali<sup>9,17,18</sup>, Helen Piwnica-Worms<sup>8,9,19,20</sup>, Sandra McDonald<sup>2,22</sup>, Mark Watson<sup>6,10,22</sup>, David J. Dooling<sup>3,4</sup>, David Ota<sup>23</sup>, Li-Wei Chang<sup>5,10</sup>, Ron Bose<sup>2,5</sup>, Timothy J. Ley<sup>1,2,3</sup>, David Piwnica-Worms<sup>8,9,17,18,21</sup>, Joshua M. Stuart<sup>24</sup>, Richard K. Wilson<sup>2,3,4</sup> and Elaine R. Mardis<sup>2,3,4#</sup>

\*These authors contributed equally to this work

# Corresponding authors

### Institutional Affiliations

<sup>1</sup>Department of Internal Medicine, Division of Oncology, Washington University, St. Louis, MO, USA

<sup>2</sup>Siteman Cancer Center, Washington University, St. Louis, MO, USA

<sup>3</sup>The Genome Institute, Washington University, St. Louis, MO, USA

<sup>4</sup>Department of Genetics, Washington University, St. Louis, MO, USA

<sup>5</sup>Breast Cancer Program, Washington University, St. Louis, MO, USA

<sup>6</sup>Division of Biostatistics, Washington University, St. Louis, MO, USA

<sup>7</sup>ACOSOG Statistical Center, Mayo Clinic, Rochester, MN, USA

<sup>8</sup>Department of Cell Biology and Physiology, Washington University, St. Louis, MO, USA

<sup>9</sup>BRIGHT Institute, Washington University School of Medicine, St. Louis, MO, USA

<sup>10</sup>Department of Pathology and Immunology, Washington University, St. Louis, MO, USA

<sup>11</sup>Helen Diller Cancer Center, University of California, San Francisco, CA, USA

- <sup>12</sup>Doctors Hospital of Laredo, Laredo, TX, USA
- <sup>13</sup>M. D. Anderson Cancer Center, Houston, TX, USA
- <sup>14</sup>Duke University Cancer Center, Durham, NC, USA
- <sup>15</sup>Good Samaritan Hospital, Cincinnati, OH, USA
- <sup>16</sup>Simmons Cancer Center, University of Texas, Houston, TX, USA
- <sup>17</sup>Molecular Imaging Center, Washington University, St. Louis, MO, USA
- <sup>18</sup>Malinckrodt Institute of Radiology, Washington University, St. Louis, MO, USA
- <sup>19</sup>Department of Internal Medicine, Washington University, St. Louis, MO, USA
- <sup>20</sup>Howard Hughes Medical Institute, Chevy Chase, Maryland, USA
- <sup>21</sup>Department of Developmental Biology, Washington University, St. Louis, MO, USA
- <sup>22</sup>ACOSOG Central Specimen Bank, Washington University, St. Louis, MO, USA
- <sup>23</sup>ACOSOG Operations Center, Duke University, Durham, NC, USA
- <sup>24</sup>Department of Biomolecular Engineering, University of California, Santa Cruz, CA USA



## Table of Contents

- A. Supplementary Materials and Methods (pp. 4-17)
- B. Supplementary Figures (pp. 18-32)
- C. Supplementary Figure Legends (pp. 33-37)
- D. Supplementary Tables (pp. 38- 281)
- E. Supplementary References (pp. 282-283)

## A. Supplementary Materials and Methods

## Whole-genome Sequencing and Alignment

We followed the procedure described by Mardis *et al.*<sup>1</sup> for library construction and sequencing. Illumina 2x75 or 2x100bp lanes were aligned individually to NCBI Build 36 of the human reference sequence using BWA 0.5.5 and samtools r544. Alignments were merged into a single BAM file and marked for duplicates using Picard 1.17. Only non-duplicate reads were used for all downstream analyses.

## Exome-capture sequencing Library Construction

Genomic DNA samples (3ug) were constructed into Illumina libraries according to the manufacturer's protocol (Illumina Inc, San Diego, CA) with the following modifications: 1) DNA was fragmented using Covaris S2 DNA Sonicator (Covaris, Inc. Woburn, MA). Fragment sizes ranged between 100 and 500bp. 2) Illumina adapter-ligated DNA was amplified in a single 50µl PCR for five cycles. 3) Solid Phase Reversible Immobilization (SPRI) bead cleanup was used to purify the PCR and select for 300-500bp fragments.

## Exome Capture Hybridization and Sequencing

Sequencing libraries were hybridized using Roche NimbleGen SeqCap EZ Human Exome Library v2.0 kits according to the manufacturer's protocol<sup>2</sup>. Illumina library quantification was completed using the KAPA SYBR FAST qPCR Kit (KAPA Biosystems, Woburn, MA).

## Exome Alignment, De-duplication, and BAM File Generation

Illumina reads were mapped to the Ensembl release 45 version of Human NCBI Build 36 using BWA<sup>3</sup> v0.5.7 with soft trimming (-q 5). For each sample, individual lane alignments in BAM format were merged together using SAMtools<sup>4</sup> r544. Duplicates were marked in the merged BAM files by the MarkDuplicates class of Picard<sup>5</sup> v1.17. Reads with mapping quality of zero, or that were marked as duplicates by Picard, were excluded from further analysis.

## SNV and Small Indel Detection

Candidate point mutations were predicted using SomaticSniper, previously referred to as glfSomatic<sup>1,6</sup>. Putative SNVs with somatic score  $\geq 40$  and average mapping quality  $\geq 40$  were considered high-confidence (HC); all others were deemed low-confidence (LC). Small indels were predicted using a combination of GATK<sup>7</sup> IndelGenotyper, Pindel<sup>8</sup>, and a modified version of SAMtools<sup>4</sup>. Both SNVs and indels were annotated using gene structure and conservation information, and classified by tier as previously described<sup>9</sup>. Briefly, tier 1 mutations alter protein coding sequences, tier 2 mutations map to conserved and/or regulatory sequences, tier 3 mutations occur in unique noncoding sequences, and tier 4 mutations map to repetitive regions. High confidence tier 2 and tier 3 mutations, and all tier 1 mutations (regardless of confidence) were selected for validation (see below).

## Copy Number Variation (CNV) Analysis

Genome-wide copy number estimates were generated on three independent platforms: array CGH, high-density SNP array, and whole genome sequencing. Array CGH data were produced using Agilent 244K arrays for all cases except BRC26, BRC38, BRC34, BRC39, BRC48, and BRC52. High-density SNP array data were produced using Illumina 1M arrays (BRC2-BRC47) and iScan arrays (BRC48-52) and were collated into a single set based on probe positions. CGH and SNP array data were processed using the CBS and CGHcall algorithms, yielding two call sets in identical format. Calls with probability scores of less than 0.5 were removed prior to subsequent analysis.

Copy number calls from whole-genome sequencing data were generated using the cnvHMM algorithm (cnvHMM, K. Chen et al, <http://genome.wustl.edu/software/cnvhmm>). First, cnvHMM divided the genome into non-overlapping windows 10kbp in size. For each window, the raw copy number was estimated as the number of reads confidently mapped (mapping quality > 35) divided by the median such value across all windows in the genome, then multiplied by two (to reflect diploid genomes). A Hidden Markov Model (HMM) was then used to perform the segmentation. Each state in the HMM corresponds to a discrete copy number value. The emission probability was modeled as a single Gaussian probability density function. A standard Viterbi algorithm was used to estimate the HMM parameters and determined the segmentation. We derived copy number altered regions (CNARs) by comparing the segmentation of the tumour genome versus that of the normal genome. A log likelihood ratio (LLR) score was computed for each CNAR to quantify the possibility of being a true CNAR from being the null (copy-number neutral) hypothesis. Calls with LLR score smaller than 20 were dropped from further consideration.

Copy number calls from CGH array, high-density SNP array, and WGS were intersected into a single set that included only calls confidently and consistently (identical gain or loss status) supported by at least two platforms.

### Structural Variation (SV) Analysis

Structural variants (SVs) were predicted by BreakDancer<sup>10</sup> with TIGRA\_SV assembly<sup>11</sup>, SquareDancer (K. Chen et al, in preparation), and Pindel<sup>8</sup>. Copy number differences with regions of SV were determined by BreakDancer<sup>10</sup>. Putative SVs from BreakDancer were chosen for localized, *de novo* assembly if they (1) had at least 2 supporting discordant read pairs in the tumour, but none in the normal, (2) were supported by a copy number change of >0.5 in the SV region, (3) affected a coding exon, or (4) had one or more breakpoints in any part of a known cancer gene. SV regions were defined as +/- 500bp from the predicted breakpoints.

The depth-weighted average contig length was used as a quality measure of the assembly:

$$q = \frac{\sum_{i=0}^{M-1} d_i l_i}{\sum_{i=0}^{M-1} d_i},$$

where  $l_i$  and  $d_i$  are the length and the average depth of contig  $i$  respectively, and  $M$  is the total number of contigs in the TIGRA assembly. Short contigs (< 30 bp) that are assembled from the homopolymer reads are excluded in the calculation. We found this statistic properly summarizes both the size and the coverage and therefore is more informative to measure the assembly quality than the N50 size. Based on our manual examination of the alignment results, we found that the high quality assemblies that contain valid sequence frequently have  $q > 100$  bp.

Once assembled, contigs were aligned to their respective local reference sequences (SV region +/- 700 bp; NCBI Build 36) using `cross_match v1.080721` with the parameters “`-bandwidth 20 -minmatch 20 -minscore 25 -penalty -10 -discrep_lists -tags -gap_init -10 -gap_ext -1`”. Contigs whose alignments had >2 segments or were significantly different from the reference (one segment with substitution >0.006 or indel rate of >0.002; or two segments with substitution rate >0.005, indel rate of >0.001, or >5 inserted/deleted bases) were removed. Assembled SVs with contig score  $\geq 50$ , and whose alignments supported a variant of type and size consistent with the original BD prediction, were selected for validation.

A complementary in house algorithm, SquareDancer, was used to identify candidate SVs by utilizing soft-clipping information from the BWA aligner. Large deletions and moderately-sized insertions were also predicted using a modified

version of the Pindel<sup>8</sup> tool. Pindel calls with read support in the tumour but not the normal, as well as calls supported by copy number evidence from cnvHMM (copy number > 0.5) were selected for validation. Candidate SVs from BreakDancer, SquareDancer, and Pindel SV regions from different methods that overlapped >75% (allowing a buffer of +/- 50 bp) were merged into a single event.

### Capture-based Experimental Validation

Nimblegen custom sequence capture arrays were designed for validation of SNVs, indels, and SVs by targeted enrichment and deep Illumina sequencing. For SNVs and small indels, we targeted ~200 bp regions centered on the variant of interest. For structural variants, we tiled 200 bp targets across the predicted breakpoint, including a minimum buffer of 200 bp in each direction. Thus, for insertions a single region is requested, but for translocations, deletions, inversions etc, we requested two regions, one for each breakpoint. Since BreakDancer reports regions of ambiguity around the breakpoints, we buffered 200 bp upstream and downstream of these regions and requested probes for the entire region. To accommodate SVs flanked by duplicate sequences, we accepted probes if they had five or fewer unique matches in the genome.

A single custom array was designed for each of the 46 cases. Tumour and normal samples were captured and sequenced independently as previously described [1]. Validation lanes were aligned to the reference sequence and BAM files created in the same manner as described above.

### Validation Data Analysis

To validate predicted SNVs and small (<3bp) indels, we used VarScan 2 (Koboldt *et al*, submitted) with the following parameters: `--min-coverage 30 --min-var-freq 0.08 --p-value 0.10 --somatic-p-value 0.01 --validation 1`. To validate low-frequency (2-8%) SNVs, we re-ran VarScan with adjusted parameters: `--min-coverage 100 --min-var-freq 0.02 --p-value 0.10 --somatic-p-value 0.01 --validation 1`. In validation mode, VarScan reads data from tumour and normal samples simultaneously, performing pair-wise comparisons at every position covered in both samples. Each position is classified as Reference (wild-type), Germline, LOH, or Somatic, based upon a comparison of the consensus genotypes and supporting read counts (Fisher's Exact Test). Positions called Somatic are further subjected to our internally-developed false-positive filter which removes sequencing- and alignment-related artifacts using several criteria (read count, mapping quality, average read position, strand representation, homopolymer-like sequence context, mismatch quality sum difference, trimmed read length, Q2 distance).

To validate putative SVs, we re-mapped reads and any unmapped mates that had aligned within 500 bp of predicted breakpoints. For this realignment, we used `cross_match v1.080721` with the parameters: `-discrep_lists -minmatch 10 -maxmatch 10 -minscore 15`. Reads were aligned as fragments, independent of their mates. In addition to the SV-containing contig from TIGRA\_SV, we mapped reads against reference sequence contigs defined within +/- 1000 bp of each breakpoint. Alignments were considered valid if they had an alignment score of  $\geq 50$ , substitution and indel rates below 1%, and  $< 2$  unaligned bases at either end. Reads that mapped to reference (wild-type) sequence within +/- 1000 bp of SV breakpoints with  $< 1\%$  substitution or indel, alignment score  $> 50$ , and  $< 2$  unaligned bases at either end were considered reference-supporting reads.

SV breakpoints are defined in the discovery phase and include any ambiguity in positioning the variant due to repetitive sequence. To be considered an SV-supporting read, a read must span the entire breakpoint region and include at least 10 additional bases beyond the region endpoints (e.g. if BreakDancer calls the breakpoint anywhere within nucleotides 200-230 in an SV contig, an SV-supporting read must cover positions 190-240). The normal and tumour bam files are used to get SV-supporting reads from each tissue. A Fisher's Exact Test of the number of variant-supporting reads and total number of reads aligned within 500 bp of SV breakpoints is used to determine significance.

SV calls were classified as somatic, germline, wild-type (no event), or ambiguous based on the supporting evidence from the validation data. For somatic SVs, we required the tumour to have at least 5 SV-supporting reads, and more SV-supporting reads than the normal, with a FET p-value of less than 0.05. We further required  $< 10$  SV-supporting reads in the normal. For germline SVs, we require at least 20 SV-supporting reads in both tumour and normal samples; SVs classified as germline in any patient were removed from the candidate lists of all patients. If no SV-supporting reads are found in tumour or normal, the variant is classified wild-type (no event). Candidate SVs that did not meet criteria for somatic, germline, or wild-type categories were classified as ambiguous.

### Manual Review of Homozygous Deletions

Read depths for the 768 validated deletions were calculated in 100 bp windows using the tumour validation BAM. Some 15% of deletions were too small to be surveyed at this window size. For the remaining 85%, read depth was manually reviewed across deletion breakpoints to determine heterozygous or homozygous status. Of these, 26 were determined to be homozygous.

## Recurrence Screening

All significantly mutated genes identified in the 46 whole genome sequenced cases were screened for recurrent mutations in an additional cohort of 121 tumour normal pairs in a manner described previously [1,2]. Briefly, using Primer3, universal-tailed PCR primers were designed to amplify all coding exons in all known isoforms. Whole genome amplified tumour DNA was PCR amplified using AmpliTaq Gold PCR Master mix and sequenced using BigDye 3.1 Sequencing Kits loaded on ABI 3730xl capillary sequencers. Data were assembled using Consed and mutations were identified using Polyscan and Polyphred. Additional attempts were made to obtain sequence coverage of genes with < 80% coverage of coding exons. All high confidence putative somatic mutations were validated with additional rounds of PCR amplification and Sanger sequencing that utilized a second independent source of tumour genomic DNA and normal DNA.

## Mutation Rate and Spectrum Analysis

Mutation rate and spectrum analyses utilized validated SNVs in tier 1 (coding), tier 2 (conserved/regulatory), and tier 3 (unique noncoding) regions. For the mutation rate calculation, the number of validated SNVs in each tier was compared to the total number of bases in that tier. The number of bases in each tier was determined using our internal annotation database. On NCBI Build 36, there were 43.89 Mbp, 248.21 Mbp, and 1198.99 Mbp in tiers 1, 2, and 3, respectively. The mutation rate (mutations per megabase) was calculated independently for each tier, and then for all three tiers combined to determine the overall mutation rate.

## Downstream Analysis of Mutation Significance In Cancer (MuSIC)

We applied our suite of downstream analysis tools, collectively called Mutation Significance In Cancer (MuSiC, <sup>12</sup>), to validated mutations in the discovery set and recurrence panel. First, the overall background mutation rate (BMR) for several categories of mutations was determined by dividing the number of validated non-synonymous mutations in each category by the number of coding bases sufficiently covered for mutation detection (14x for tumour, 8x for normal) in that category. We used these categories: AT transitions, AT transversions, CpG transitions, CpG transversions, CG (non CpG) transitions and transversions, and a seventh “indel” category, for which we use the entirety of the covered space when comparing indels versus available bases. P-values describing mutational significance were assigned to each gene for each category by comparing the gene’s mutation rate (MR) of that category to the overall BMR in the same category. Significantly mutated genes (SMGs) were identified on the basis of three tests used to sum the p-values from the 7 mutation categories. These tests include a convolution test, which calculates a summarized log statistic of joint binomial



point probability, a likelihood-ratio test, which summarizes p-values using a likelihood ratio-based statistic calculated using the given mutation number, the BMR, the coverage, and the maximum likelihood estimate of the MR, and lastly, a Fisher's combined p-value test, which combines p-values from different mutation categories into a statistic using Fisher's method<sup>13</sup>, and then compares this statistic to a  $\chi^2$  distribution to determine significance.

Once SMGs were identified, we used a correlation test to determine co-occurrence (positive correlation) and mutual exclusivity relationships (negative correlation) between mutations in SMGs. These tests are performed pair-wise between each SMG and every other SMG, and p-values are calculated using a controlled permutation method which takes into account the distribution of mutation counts amongst the samples.

The entire list of mutations was also compared to the collected clinical data using a clinical correlation test. A Pearson's correlation is used to compare numerical clinical data to mutation counts, while a Fisher's exact test was used to compare categorical clinical data to mutation counts. Other MuSiC packages identified clusters of mutations in close proximity to one another within a gene, as well as mutated residues previously reported to COSMIC and OMIM databases.

### Clinical Correlation Analysis

Mutation frequency of a gene in SET 1 and SET 2 and within each category of a categorical variable was calculated. The Fisher's exact test or Chi-square test whichever proper was used to examine the mutation difference between the two sets and associations between categorical variables and gene mutations. The geometric mean of Ki67 at baseline, surgery and corresponding percentage change were calculated (with the zero values at baseline and surgery replaced by 0.001 and 0.0001 individually). The Wilcoxon rank sum test was applied to compare the Ki67 distribution between mutant and wildtype cases. To address the concern of multiple testing, adjusted p-values based on Benjamini-Hochberg false discovery rate (FDR) and 1000 permutations were obtained for the whole set (SET 1 and 2 combined). To confirm the reproducibility of significant associations despite set division, a leaving half-out cross-validation procedure (1000 times) was adopted where the whole set of 317 samples were randomly split into two sets of equal sample size and association test p-values were calculated from both set to derive the percentage of times an association is significant with both raw p-values  $\leq 5\%$ .

## Gene Interaction Network Analysis

The interaction networks were compiled from Metacore maps (GeneGo, Inc.) significantly intersecting with the mutation list (corrected FDR < 0.05). Mutated genes in multiple network objects were only considered in one object to prevent redundant mutation counts. Network objects were classified into eight functional networks and arranged hierarchically in Cytoscape [10]. SMGs AGTR2, STMN2, MLL3, and SF3B1 were not included in any maps by Metacore, so curated interactions were added with members of the most applicable network. Some interactions between non-mutated nodes were removed for clarity. The number of tumors harboring a node mutation is indicated by node size. SMGs from each network are differentiated in red and by a reference number; other mutated objects are colored black. All 77 tumors were classified by network and SMG mutation status in a concentric display. Each patient is represented by a spoke in the wheel, affected networks for each patient are indicated by the appropriate color, and SMG mutations are shown as black dots in the parent network. The MLL2/3 complex is represented as a single network node with multiple mutated constituent genes. Of these, only MLL3 was considered an SMG in patient classification. (Supplementary Data Files)

## PARADIGM integrated pathway analysis of copy number and expression data

Integration of copy number, gene expression, and pathway interaction data was performed using the PARADIGM software<sup>14</sup>. Briefly, this procedure infers integrated pathway levels (IPLs) for all *pathway features* including genes, complexes, and processes using pathway interactions and genomic and functional genomic data from a single patient sample. PARADIGM uses a factor graph model based on a pathway database. In this paper, we used, a *SuperPathway*, which is an integration of a network of cellular pathways drawn from the NCI and Reactome database and includes both genes and abstract pathway concepts. The SuperPathway contains interactions for 16,363 features including 5541 proteins. PARADIGM inferred pathway features are preferable over gene expression since PARADIGM integrates knowledge of CNV. Additionally, PARADIGM infers IPLs that are not available by current assays.

We applied PARADIGM to the analysis of the 77 discovery samples and then separately to the 124 validation samples for which both gene expression and copy number data were available. We first asked what genes received significantly high or low activities in the tumour samples relative to normal such that they would be suggested markers of disease. To this end, we formed a background distribution by creating 1000 “simulated patient samples” made up of randomly permuted data tuples. The construction of a simulated sample was made by distributing the data arbitrarily about the SuperPathway. PARADIGM was then rerun using these simulated samples, thus producing a background of inferred activities for each gene. Using this background we could then assess if an inferred level of a gene in a particular sample exceeded  $c$

standard deviations from the average seen in the simulated control samples. If a gene exceeded  $c$  in at least 2 samples it was categorized as *modulated*. Sweeping through higher (more stringent) values of  $c$  yielded fewer genes. When the number of genes was plotted against this modulation cutoff (Supplementary Figure 7a) it revealed that many genes with appreciable levels of noise are discarded at low cutoffs but a robust set of genes with significant activities were invariant to a range of higher levels. We identified 724 genes as the “elbow” in the curve as that point of diminishing returns where we expect to find the largest number of such modulated genes – raising the cutoff more had little effect on the retained set.

It is important to note that the procedure to identify this set of genes used only the samples in the discovery set. This allowed us to assess the overall reproducibility of the PARADIGM method on the validation set using a straightforward comparison of the modulated genes discovered independently in the validation set.

If the inferences found for the genes using the samples from the discovery set are robust then the set of genes receiving significantly modulated (high- or low-activities relative to normal) should correspond to the same genes identified as modulated in the validation set. Indeed, we found this to be true. By sweeping through modulation cutoffs on both the validation and discovery sets we found that the set of genes identified as the most overlapping between the two were very close to the “elbow” point on the curves identified as the point where the set of reliable genes were identified (Supplementary Figure 7b-c). The overlap of the genes modulated in the discovery set with those modulated in the validation set was 70% which is highly significant (hypergeometric test,  $P < 10^{-300}$ ).

To produce a single PARADIGM result, we next combined the 77-sample discovery and 124-sample validation sets and reran PARADIGM on the combined dataset. We repeated the modulation analysis and found 628 genes (87% overlap with the test set). The inferred pathway activities of the 628 modulated genes across the discovery samples were plotted (Supplementary Figure 7). The genes and samples were ordered using hierarchical agglomerative clustering as coded in the Eisen 2.0 Software Package<sup>15</sup>. The gene clusters were then overlapped with the constituent sub-pathways that were used to build the SuperPathway in order to annotate which subnetworks had been selected by modulation and reveal their cohort signatures. The TreeView-formatted dataset is available as a Supplementary Data File.

## Differential Pathway Signature Correlation

The pathway activities inferred by PARADIGM can be used analogously to gene expression levels for the purpose of identifying signatures that predict the presence or absence of a particular tumour attribute of interest. Signatures were derived by classifying samples into dichotomous sets based on clinical features or the presence of a mutation. Each mutation dichotomizes the samples into two groups: those with the mutation and all others. The IPL values for all proteins were then fed to Significance Analysis of Microarrays (SAM) to determine the Differential IPLs (DPLs). SAM uses a dichotomization of the samples in a two-way test. The DPL scores are then summarized using Gene Set Enrichment Analysis. The gene sets are drawn from the underlying NCI and Reactome databases as well as Gene Ontology (GO). Cluster-Eisen then clusters the data from SAM. The Gene Set Enrichment Analysis labels are applied to the heatmap rendered by Java Treeview<sup>16</sup>.

## Comparison of PARADIGM sub-networks to MetaCore Maps

We asked whether the pathways identified by the mutation-directed MetaCore analysis were coincident with the pathways identified by PARADIGM as modulated when viewing the transcription and copy number data of the 77 sample discovery cohort. To do this, we first determined which of the constituent pathways that were used to build PARADIGM's SuperPathway were present among the modulated features. We found 233 such sub-networks among the 3974 modulated features. We performed all pair-wise intersections between these 233 sub-networks and the 104 MetaCore maps using only the proteins present in each sub-network. Proteins were identified by mapping both the SuperPathway sub-networks and MetaCore maps to HUGO gene symbols. We used a stringent p-value cutoff to impose a multiple testing correction due to the  $233 \times 104/2$  unique comparisons. The result of this analysis determined that 75 (72%) of the MetaCore maps were also identified as modulated by PARADIGM and represented as one of 87 modulated SuperPathway sub-networks (Supplementary Figure 9). The list of common sub-networks are listed in Supplementary Table 20 and include many expected and important pathways involving regulation of retinoblastoma, mTOR signaling, ATM and ATR signaling, endothelins, HIF1A, RAS signaling, and so on. This finding is highly significant and is reassuring that these two approaches using different data sources converge on the same set of altered pathways.

## Pathway-based signatures of response

Differential pathway levels (DPLs) associated with Ki67 response are then computed using the SAM approach that computes a corrected t-statistic for each gene in the pathway. A network of interlinked differentially active genes we refer

to as a PathMark was then identified as those interactions in the SuperPathway connecting two genes with absolute SAM scores better than average (Supplementary Data Files). Because the original inferences were derived from an underlying connected network, it is possible that the observed subnetworks of interconnected markers arise from serendipitous but random associations simply due to PARADIGM's belief propagation framework. We asked whether the observed PathMark is significant. If the interconnection among the genes in the PathMark are indeed associated with response then one would expect that the size of the sub-networks would be larger than networks obtained from random patients in which data tuples were permuted around the SuperPathway. We indeed found that the observed largest connected sub-pathway was significantly larger than expected by chance (Supplementary Figure 10a). We repeated the entire procedure on the validation set and found that the DPLs were very similar (Supplementary Figure 10b)

### Associating tumour attributes with pathway signatures

The derivation of PARADIGM inferred activities enables a molecular pathway-based comparison of samples that may help reveal new connections between mutations, clinical outcomes, and cancer subtypes. A dichotomous division of samples into two groups was formed for every categorical variable. A positive class made up of samples that have a particular value of an attribute and a negative class that lack the value of the attribute in question. For continuous-valued variables, such as Ki67 response, positive and negative classes of samples can be defined using a threshold to turn the attribute into a discrete-valued categorical variable. Once a dichotomous variable was established for a tumour attribute we calculated a signature for the dichotomy made from an associated DPL vector as described above again using the SAM software. The DPL signature encapsulates the pathway-informed up- and down-regulation of genes that are characteristic of patients with a particular tumour feature such as the presence of a mutation or Ki67 response. The relationships between these clinical and genomic characteristics could then be assessed by comparing their DPL signatures to one another. The correlation between all pairs of dichotomous variables was then assessed by computing the Pearson correlation between all pairwise clinical- and mutation-derived DPL signatures.

### Histone modification genes in luminal breast cancer

An array of coding mutations (a significant fraction of them leading to protein truncations) and structural variations was discovered in methyltransferases (*MLL2*, *MLL3*, *MLL4*, and *MLL5*), demethyltransferases (*KDM6A*, *KDM4A*, *KDM5B*, and *KDM5C*), and acetyltransferase (*MYST1*, *MYST3*, and *MYST4*) (**Supplementary Table 19**). Furthermore, our analysis identified several adenine-thymine (AT)-rich interactive domain-containing protein genes (*ARID1A*, *ARID2*, *ARID3B*, and *ARID4B*) that harbored mutations and large deletions, reinforcing the role of members from the SNF/SWI family in breast

cancer. Inactivating mutations in *MLL2* and *MLL3* were recently reported in 16% of medulloblastoma patients<sup>17</sup> and *ARID1A* was previously found to be highly mutated in ovarian clear cell carcinoma<sup>18</sup>. Taken together, over 52% (24 out of 46) of patients exhibited alterations in histone lysine methyltransferase, demethylase, and acetyltransferase pathways. Thus, studies investigating the contribution made by chromatin modifications to the development of luminal breast cancer are warranted.

### Frequently mutated non-coding regions

To investigate the potential importance of mutations found in non-coding regions, we applied a sliding window-based approach to detect clusters of mutations in tiers 2-3. We observed *ATR* intronic mutation clusters, as well as six tier 2 mutations within a 1 kb region of *GPR126*, and one tier 2 and four tier 3 mutations within a 2 kb window of *NRG3* (**Supplementary Table 7**). *GPR126* is required for myelination<sup>19</sup> and was not previously linked to breast cancer. On the other hand, *NRG3* germline loss has been shown to lead to congenital breast aplasia in mice and is required for early breast morphogenesis<sup>20-22</sup>.

### Complex landscape of copy number alterations and structural variations

Copy number alterations (CNAs) present in the 46 tumour genomes were identified using data from three platforms: array CGH, SNP array, and whole genome sequencing. The 3 results subsequently were intersected to produce a unique set of CNAs supported by at least 2 platforms. Analysis of cumulative log<sub>2</sub> ratios revealed arm-level gains (cumulative log<sub>2</sub> ≥ 5) for 1q, 5p, 8q, 16p, 17q, 20p, and 20q and arm-level losses (cumulative log<sub>2</sub> ≤ -5) for 1p, 8p, 16q, and 17p, consistent with previous reports for luminal breast cancer<sup>23</sup> (**Supplementary Fig. 5**). CMDS<sup>24</sup> was used to identify recurrent focal CNAs using the whole-genome data set (**Supplementary Table 10**). This analysis yielded 35 focal regions of amplification, all encompassing 10 or fewer genes. Some of the most common focal amplifications included the cancer-associated genes *ZNF217*, *GAB2*, *BCAS1* (breast carcinoma-amplified sequence 1), and *ELF5*, each amplified in greater than 10% of tumours. CMDS also identified 24 focal deletions, of which 20 harbor fewer than 10 genes.

A total of 773 SVs (579 deletions, 189 translocations, and 5 inversions) identified by WGS were validated as somatic in 46 breast cancer genomes by capture validation (**Supplementary Table 11** and Supplementary Information). Paired end reads identified 579 deletions, including 163 events smaller than 1kb that are likely below the resolution of array-based detection.

Among the 7,815 genes affected by SVs, only 534 were previously described in Stephens *et al.*<sup>25</sup>. Although a large number of genes (1,793) were recurrently affected by SVs, only 74 occurred within deletions smaller than 5 Mbp or in other types of structural alteration (**Supplementary Table 12**). Of note, recurrent SVs occur in widely divergent gene families, including tyrosine protein phosphatases (e.g., *PTPRR*, *PTPRQ*, *PTPN1*, and *PTPN5*), MAP kinases (e.g., *MAP3K1*, *MAP4K2* and *MAP2K4*) (**Fig. 3a**), histone post-translational modification enzymes (e.g., *SETDB1*, *MYST3*, and *MYST4*), and transcription factors (e.g., *ETV3* and *PAX6*).

*NRG1* encodes a number of isoforms that are ligands of the EGFR family. Gene losses and rearrangements in *NRG1* have been reported<sup>26,27</sup>, including our earlier observation in a basal breast tumour of a 109,563 bp heterozygous deletion that removed three exons of *NRG1*<sup>28</sup>. In this series, three *NRG1* deletions were observed with sizes of 555 bp, 3,338,927 bp, and 4,253,849 bp, respectively, further reinforcing the involvement of *NRG1* loss in breast cancer. Among 773 validated SVs, 7 deletions and 7 translocations were predicted to give rise to in-frame fusion proteins. We confirmed the expression of fusion transcripts for 6 of these events using RT-PCR, including ELP3-*NRG1*, *APIP-ABTB2*, *DNAH9-MYOCD*, *CHDH-ULK4*, *NAV2-C11orf49*, and *BCAS3-ATP8B4* (**Supplementary Table 13**). The ELP3-*NRG1* fusion (ENST00000256398-ENST00000405606) (**Fig. 3a**) could encode a protein with the first 522 (of 547) amino acids of ELP3 (elongator complex protein 3) fused to the *NRG1* transmembrane and cytoplasmic domains. The potential fusion protein eliminates all of the *NRG1* extracellular domains including the EGF-like and the Ig-like C2-type ligand-binding domains. Another validated fusion is the *BCAS3-ATP8B4* (ENST00000407086-ENST00000284509) fusion found in patient BRC6, wherein 406 codons of *BCAS3*, including two WD (tryptophan-aspartate) repeats, are fused to *ATP8B4* codons 429 to 1192. *ATP8B4* belongs to the cation transport ATPase (P-type) family. *BCAS3* (breast carcinoma amplified sequence 3) is fused to *BCAS4* in the MCF7 breast cancer cell line<sup>29</sup> and chimeric transcripts encoding portions of *BCAS3* and *MET* are overexpressed in esophageal adenocarcinoma<sup>30</sup>. Further, *BCAS3* overexpression in hormone receptor-positive premenopausal breast cancer has been associated with impaired tamoxifen responses<sup>31</sup>.

## B. Supplementary Figures



## Supplementary Figure 1

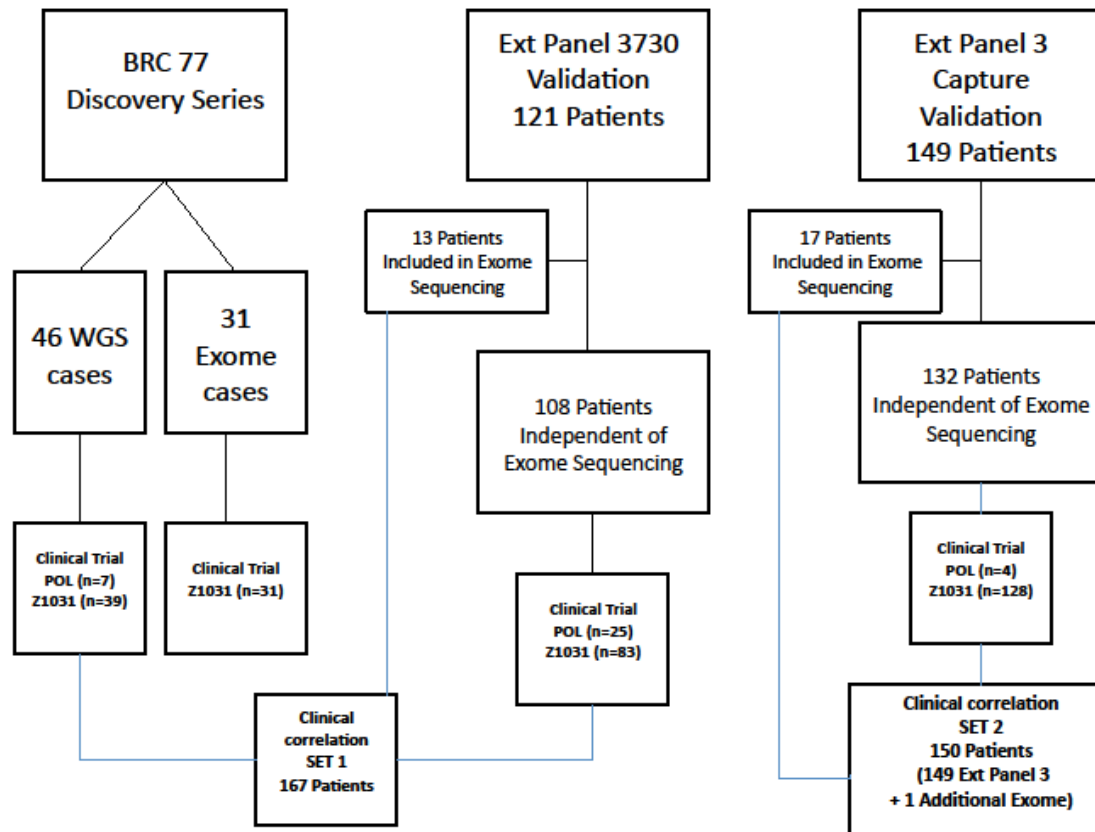

## Supplementary Figure 2

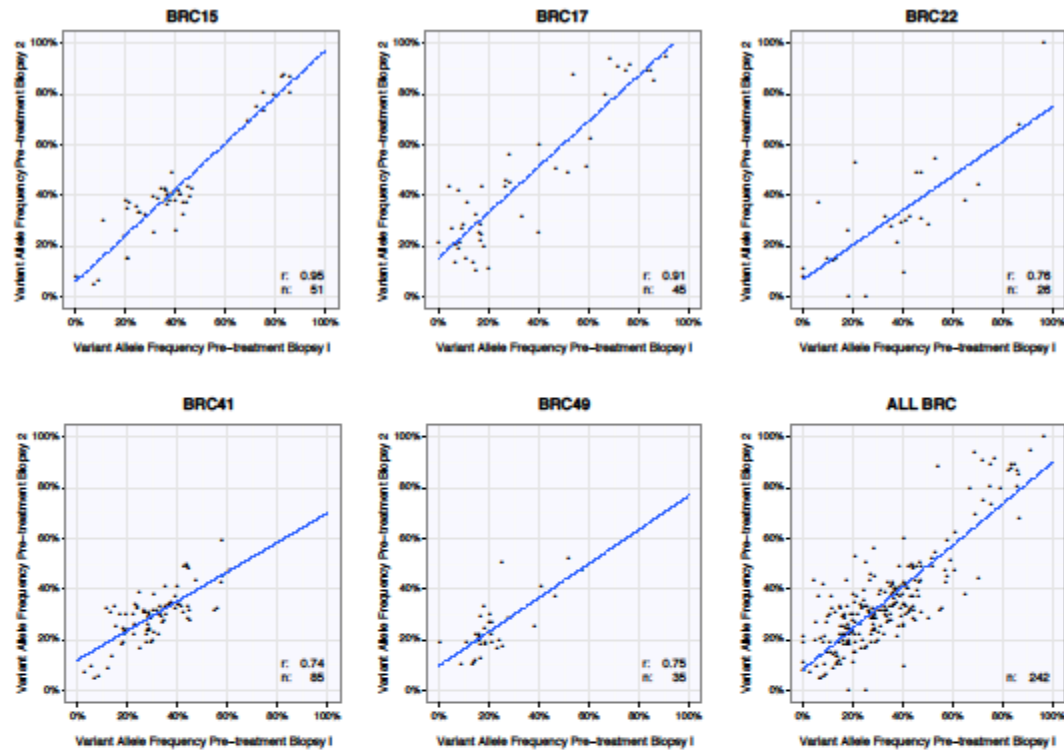

Supplementary Figure 3a

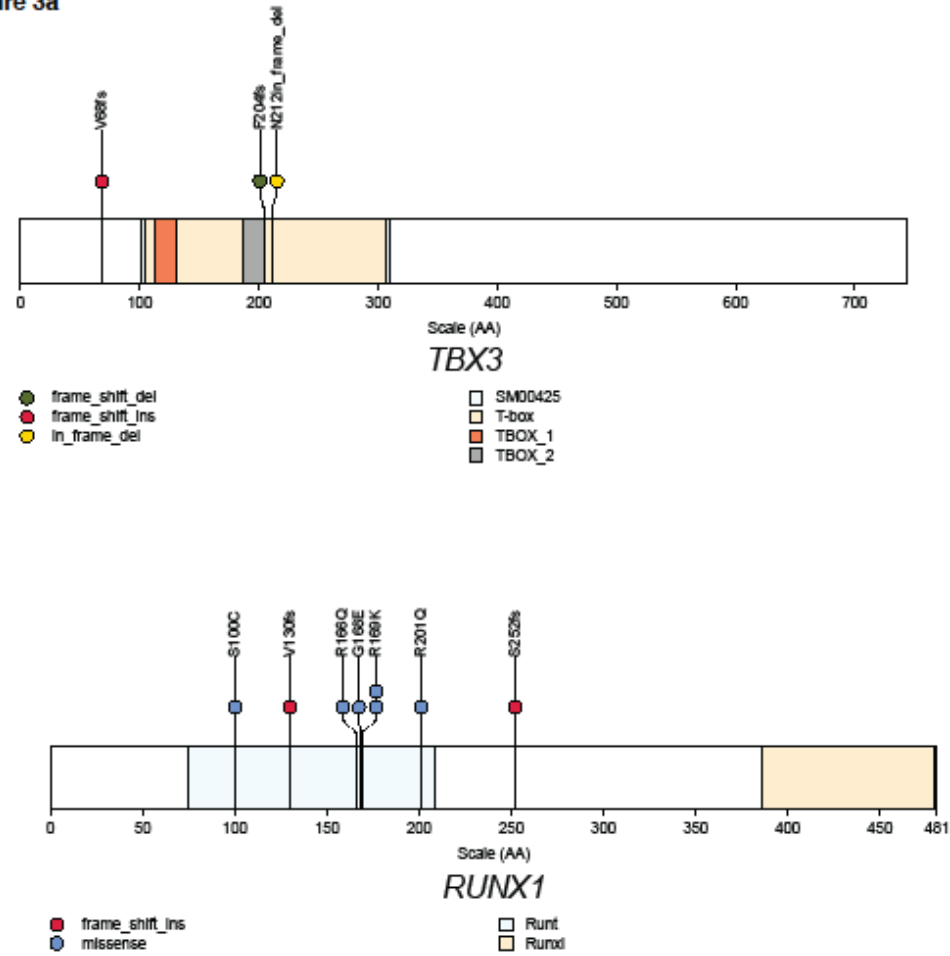

Supplementary Figure 3b

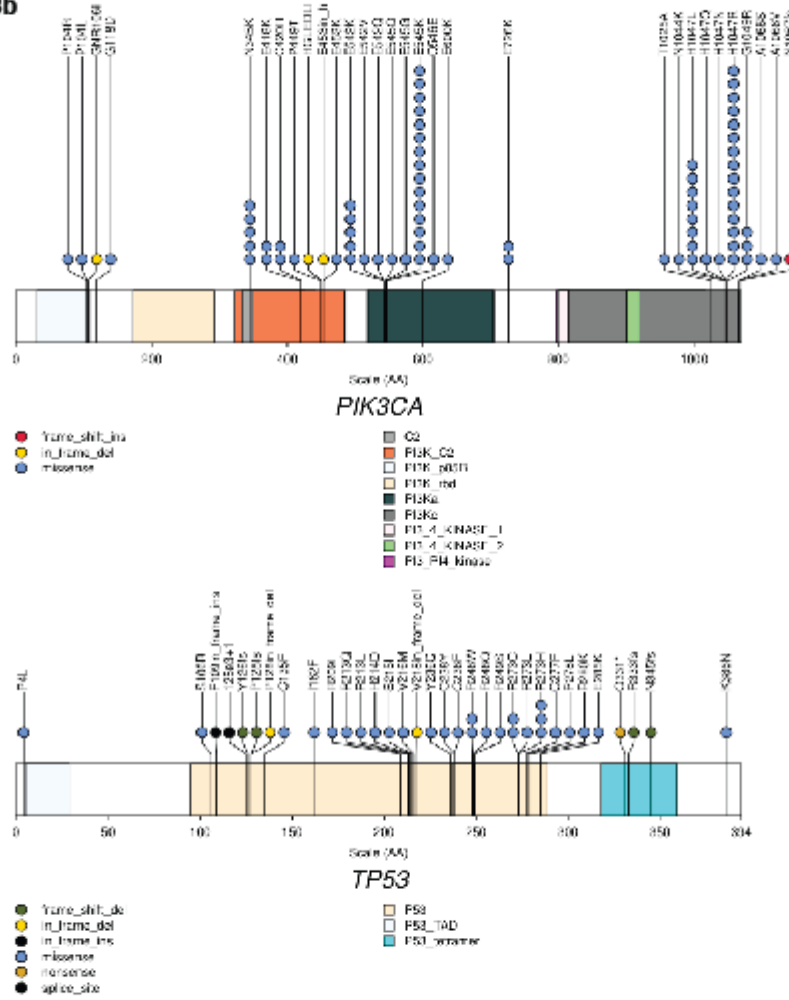

Supplementary Figure 3c

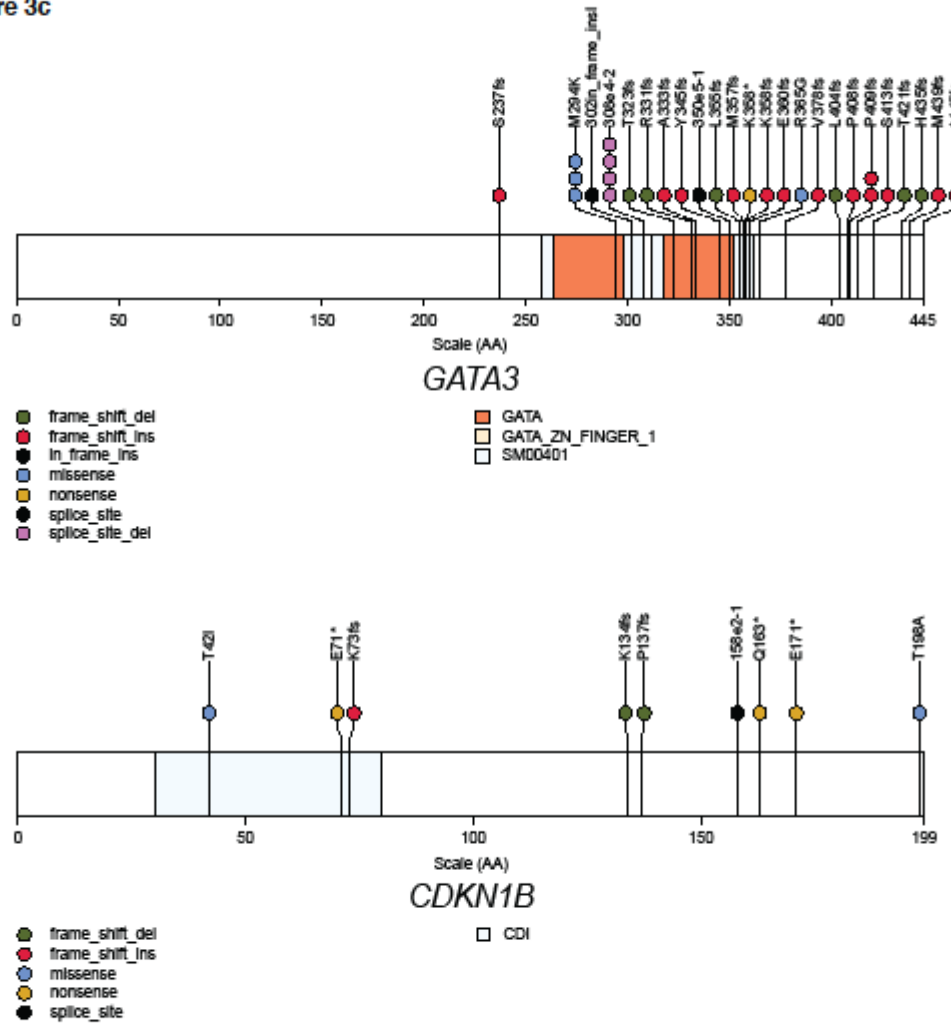

### Supplementary Figure 4

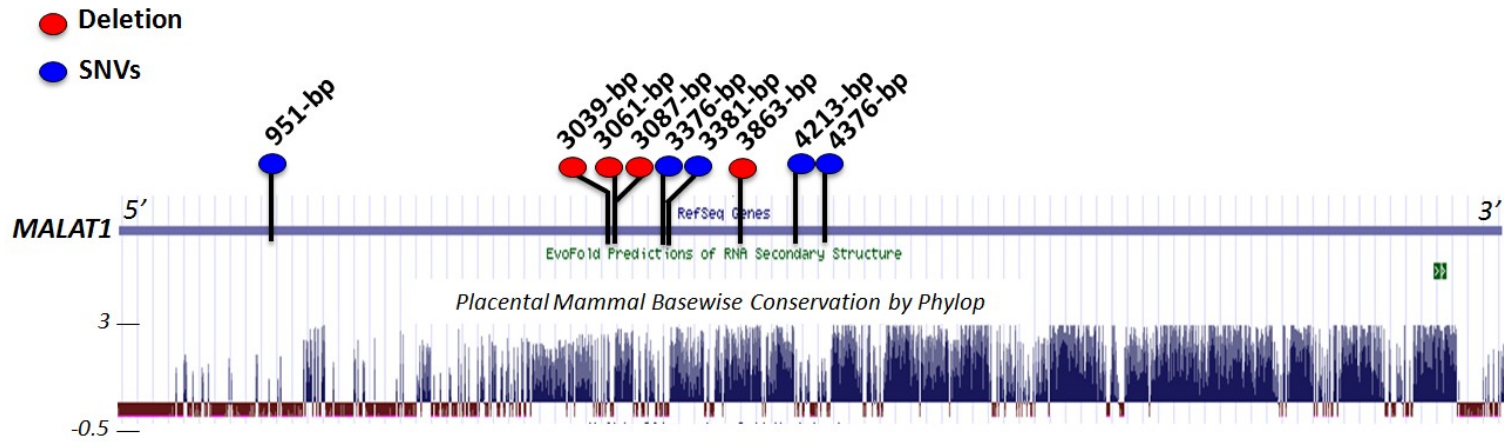

### Supplementary Figure 5

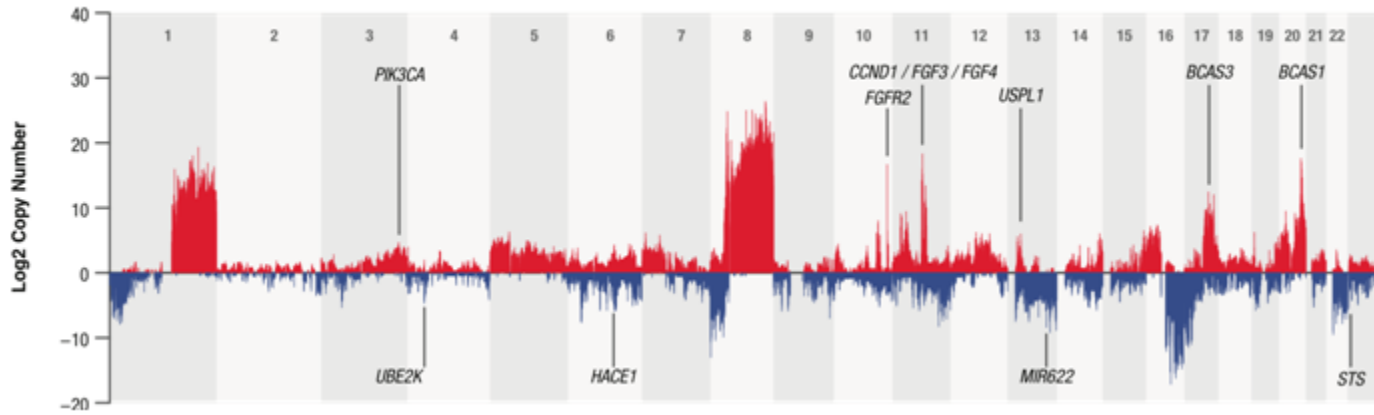

Supplementary Figure 6

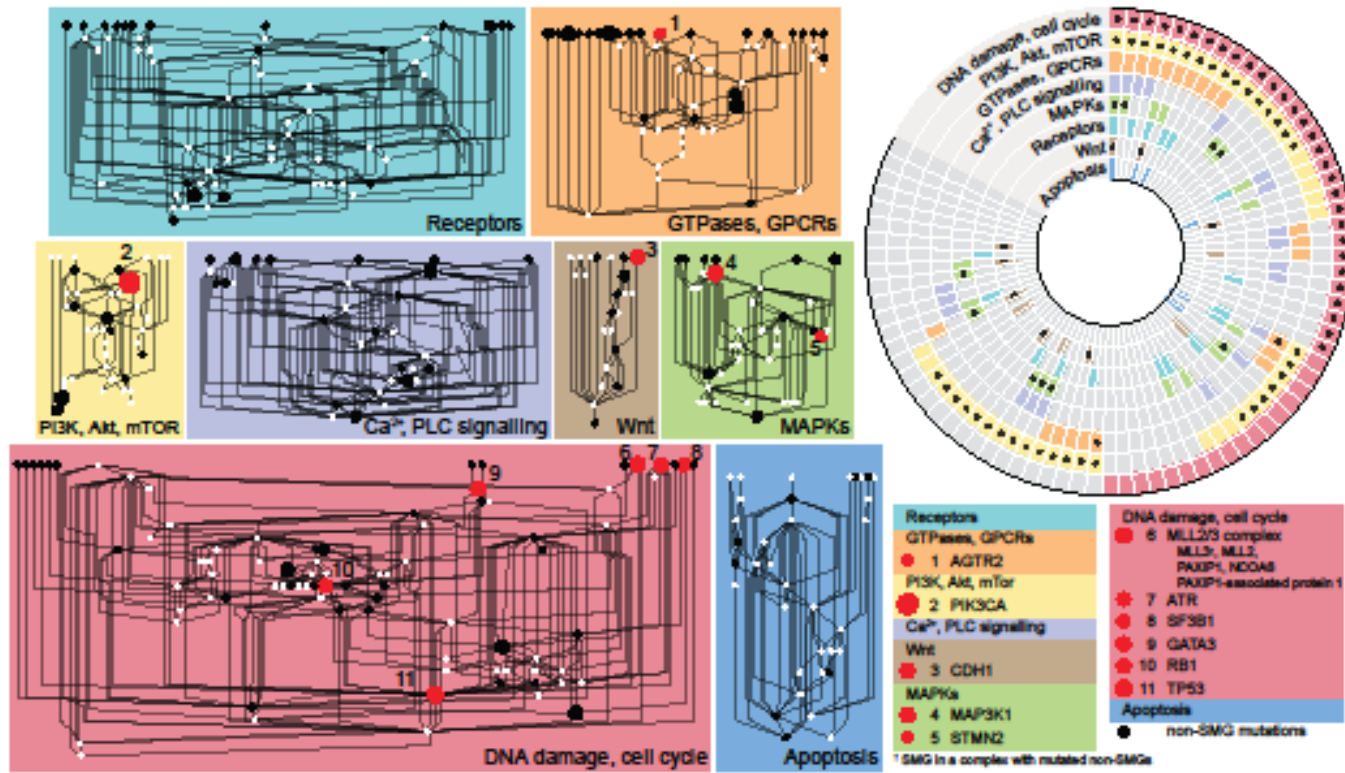



Supplementary Figure 7

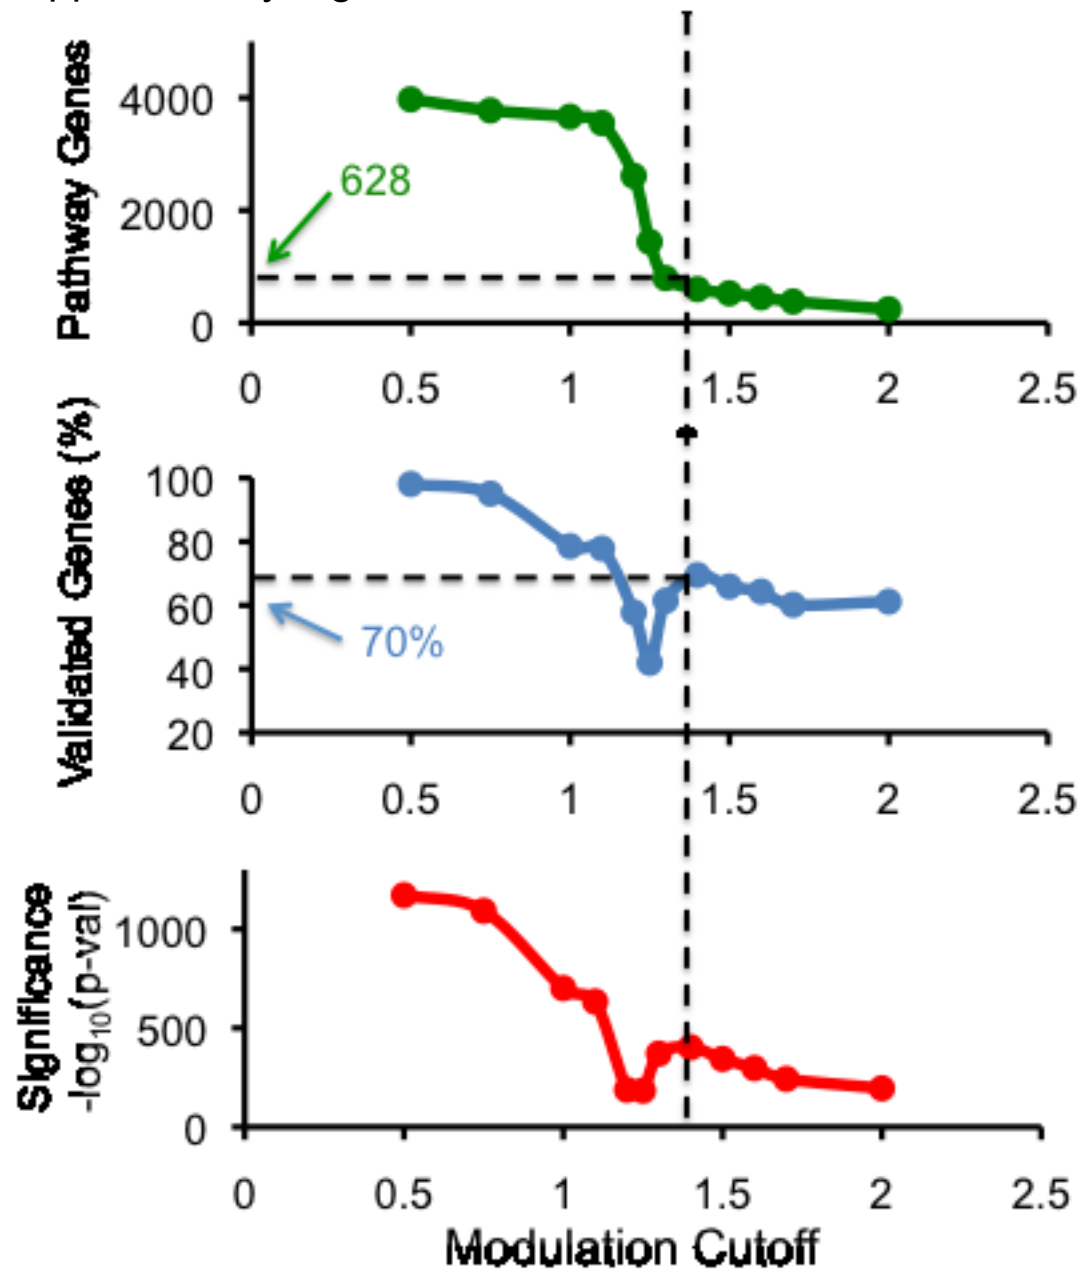

### Supplementary Figure 8

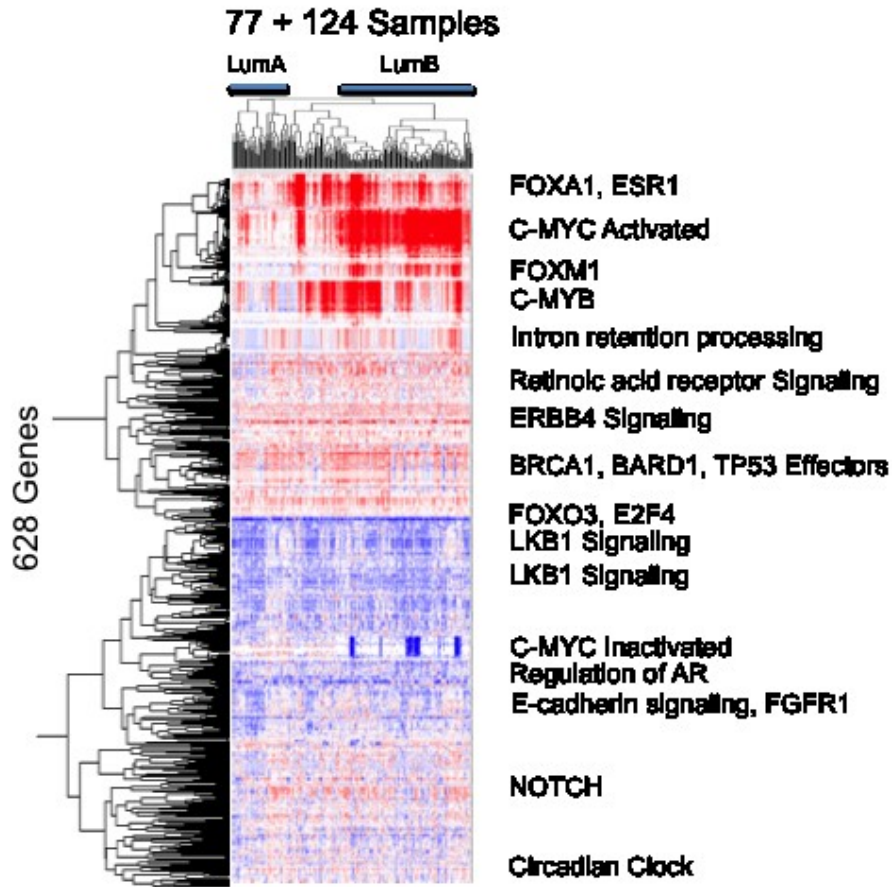

### Supplementary Figure 9

**233 PARADIGM Subnets**

**104 MetaCore Maps**

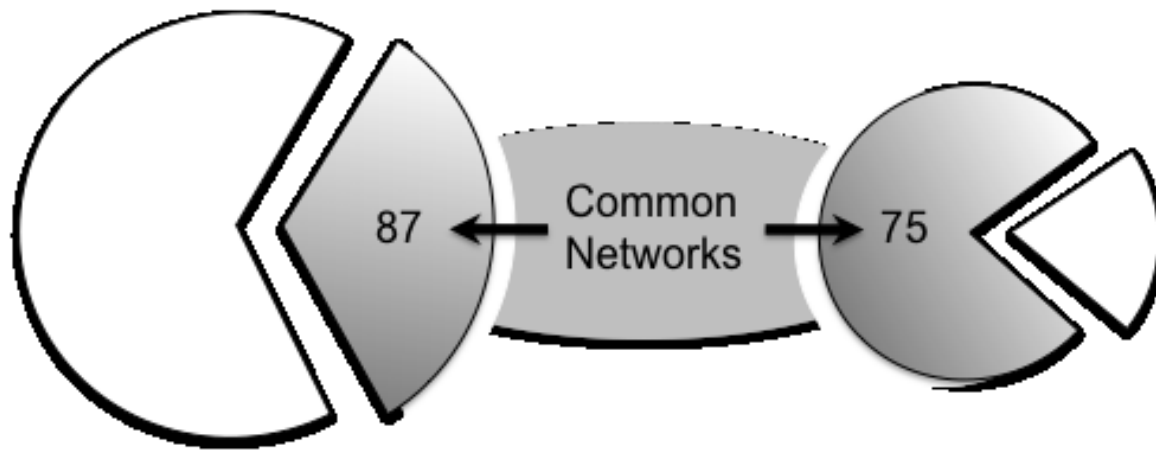

### Supplementary Figure 10

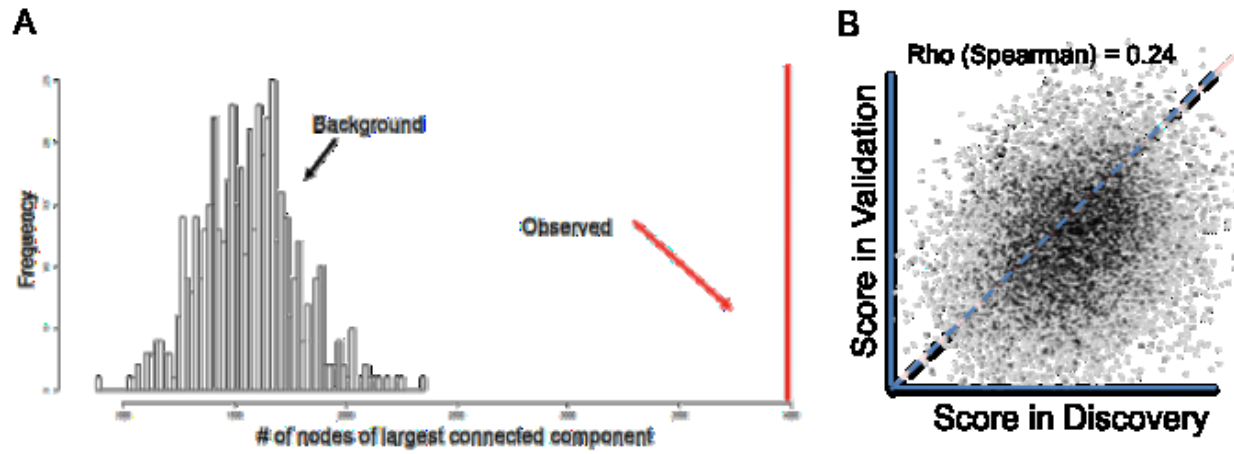

### Supplementary Figure 11

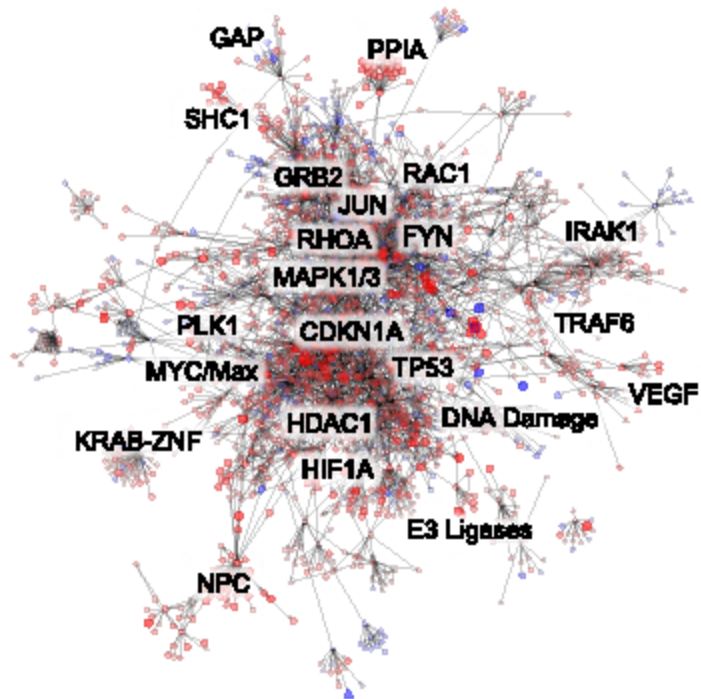

# Supplementary Figure 12

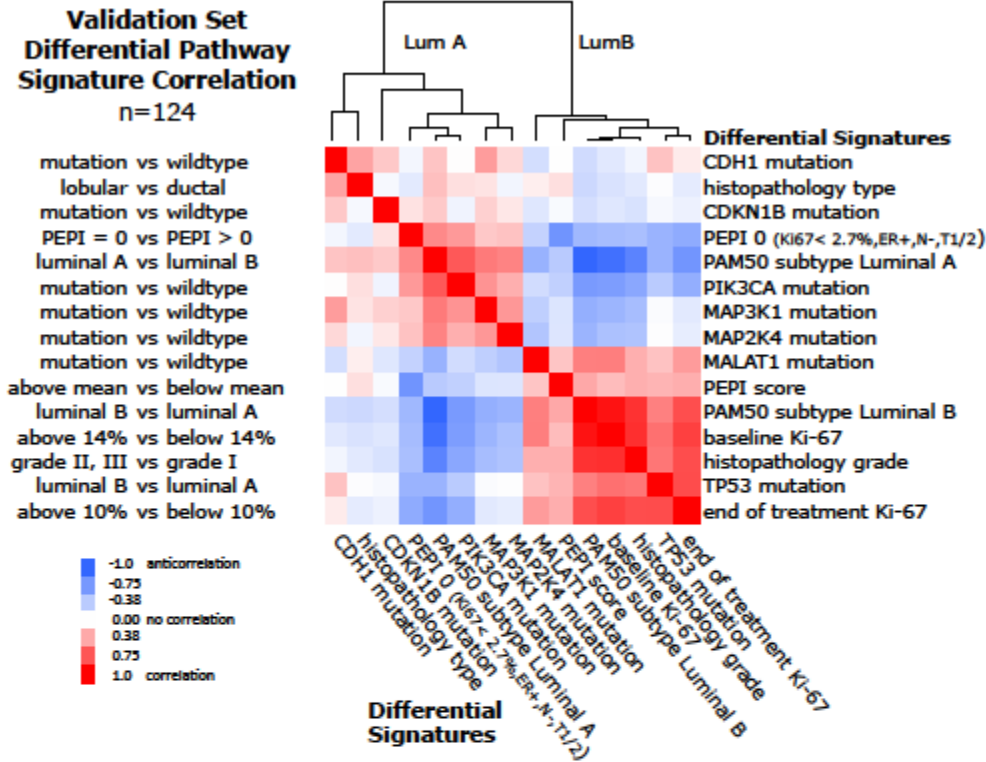

## C. Supplementary Figure Legends

**Supplementary Figure 1. Experimental design of and sequencing overview of Set1 and Set2**

**Supplementary Figure 2. Mutational comparison of synchronous core biopsies.** Scatter plots display variant allele frequencies from predicted tier 1 somatic mutations identified in genomic DNAs from two independent, synchronous core-biopsies of five pre-treatment luminal breast tumours. For each case the Pearson correlation coefficient values ( $r$ ) and total number of mutations ( $N$ ) are shown. Panels 1 to 5 represent the five cases and panel 6 represents the combined data.

**Supplementary Figure 3. *CDKN1B*, *GATA3*, *PIK3CA*, and *TP53* mutations observed in 317 cases and *RUNX1* and *MALAT1* mutations observed in 209 luminal breast tumours.** Somatic status of all mutations was obtained by Sanger sequencing of PCR products or Illumina sequencing of targeted capture products. The locations of conserved protein domains are highlighted. Each nonsynonymous substitution, splice site mutation, or indel is designated with a circle at the representative protein position with color to indicate translational effects of the mutation.

**Supplementary Figure 4. Conservation of *MALAT1*.** The UCSC schematic shows conserved RNA secondary structures predicted by EvoFold (green rectangle) and basepair conservation across 46 species determined by PhyloP. *MALAT1* mutations are displayed relative to the transcript (red – deletion; blue – SNV). Only the SNV at position 951 resides in the region of lower conservation at the 5' end of *MALAT1*. The only predicted secondary structure is located towards the 3' end of *MALAT1* and does not overlap the predicted mutations.

**Supplementary Figure 5. Cumulative log<sub>2</sub> copy number plot of 46 whole genome sequenced BRC samples.** Labeled peaks reflect selected regions of recurrent and focal CN change identified by CMDS along with broad peaks identified by analysis of recurrence.



**Supplementary Figure 6. Key cancer pathway components altered in luminal breast tumours.** Eight interaction networks from canonical maps are significantly over-represented by mutations in 77 luminal breast tumours (46 WGS and 31 exome cases). Maps were grouped by function and arranged to reflect overall hierarchy of signaling through protein-protein interactions. Mutated genes are represented in black and sized to reflect the number of tumors containing each mutation. SMGs are shown as red nodes with reference numbers indicated in the key. White nodes are non-mutated network objects. In the concentric circle diagram, tumors are arranged as radial spokes and categorized by their mutation status in each network (concentric ring color) and SMG mutation status (black dots). Tumor classification by pathway analysis shows many tumors unaffected by a given SMG often harbor other mutations in the same network. For full annotation, see Supplementary Information for Gene Interaction Network Analysis.

**Supplementary Figure 7. Genes with significant pathway-informed modulation (either more active or more inactive in tumours compared to normal) correspond to those genes rediscovered in the validation set.** The inferred activity of every gene in every sample was compared to a set of 100 randomly simulated controls. Those genes with levels larger than a *modulation cutoff* of at least  $c$  standard deviations ( $x$ -axis) were retained. Various values of  $c$  were swept through to define a different set of retained pathway genes ( $y$ -axis; upper plot). The proportion of these retained genes were compared to those retained in the validation set using an identical but independent modulation filter ( $y$ -axis; middle plot). The significance of this overlap in  $-\log_{10}(\text{p-value})$  were also calculated ( $y$ -axis; lower plot). A maximum significance was identified to the right of the significance representing bias due to large compared sets, which identified a network containing 628 genes with a 70% validation rate.

**Supplementary Figure 8. PARADIGM inferences for all 628 significantly modulated genes (rows) across both the 77 discovery and 126 validation samples (columns).** Subnetwork enrichment analysis of the gene clusters revealed several coordinated subnetworks which are listed on the right. Genes inferred to have activities higher in tumour compared to normal are shown in red while those inferred to be less active are shown in blue. The first sample division defined a set of luminal A enriched samples (left hand side) and luminal B enriched samples (right hand side).

**Supplementary Figure 9. Comparison of mutation-derived MetaCore Maps to transcriptionally-derived PARADIGM networks reveals high pathway concordance.** 233 PARADIGM sub-networks were represented among the 3974 significantly modulated features (742 modulated genes) as identified using expression and copy number data on the 77 sample discovery set. MetaCore analysis produced 104 “maps” of interconnected genes using the significantly mutated genes identified on the discovery set. We overlapped every MetaCore map with every PARADIGM sub-network and determined if each overlap was significant at a significance level of 0.05 using a Bonferroni multiple testing correction for the 12,116 unique pair-wise comparisons. Of the 104 maps, 75 (72%) were found to have a significant overlap ( $P < 4.1 \times 10^{-6}$ ) with one of 87 modulated PARADIGM sub-networks.

**Supplementary Figure 10. Significance and reproducibility of pathway-based signatures of response.** The size of the pathway determined to be correlated with Ki67 response was computed (red line) and compared to 1000 random networks derived from permuted samples (histogram). B. The differential inferred activity for each gene was determined and plotted for both the discovery set (x-axis) and validation set (y-axis) and an overall Pearson correlation of 0.24 was calculated.

**Supplementary Figure 11. PARADIGM-based AI response network and associations in luminal breast tumours pathway signature for Ki67 response.** Pathway features including genes (circles), complexes (hexagons), biological processes (rectangles), and gene families (triangles) from the largest connected component with inferred activities either positively correlated (red) or anti-correlated (blue) to Ki67 response and connected to other correlated features from the SuperPathway are shown. For display purposes the “hubs” (genes with 10 or more connections) along with their neighbors are kept; hubs with 35 or more connections labeled. Cytoscape sessions are available as Supplementary Data Files.

**Supplementary Figure 12. PARADIGM-based AI response network and associations in luminal breast tumours pathway signatures reveal connections between mutations and clinical outcomes.**

PARADIGM-based pathway signatures were derived for tumour feature dichotomies including mutation driven gene signatures (mutant vs. non-mutant), histopathology type (lobular vs. ductal), preoperative endocrine prognostic index (PEPI) score (PEPI=0 favorable vs. PEPI>0 unfavorable), PAM50 Luminal A subtype (LumA vs. LumB) and the reverse (LumB vs. LumA), histopathology grade (grades II&III vs. I), baseline Ki67 levels ( $\geq 14\%$  vs.  $< 14\%$ ), and end-of-treatment Ki67 levels ( $\geq 10\%$  vs.  $< 10\%$ ) and overall PEPI score (higher than mean unfavorable vs. lower than mean favorable). Pearson correlations were computed between all pair-wise signatures; positive correlations, red; negative correlations, blue; column features ordered identically as rows. Correlation analysis on the 124 validation samples.

## D. Supplementary Tables

| Case  | Sample | Lanes | Input Bases | Haploid Coverage | Unfiltered Heterozygous SNP Concordance (%) | Filtered Heterozygous SNP Concordance (%) |
|-------|--------|-------|-------------|------------------|---------------------------------------------|-------------------------------------------|
| BRC3  | Normal | 40    | 113.855 Gb  | 27.654           | 98.89                                       | 97.83                                     |
| BRC3  | Tumour | 40    | 113.728 Gb  | 34.202           | 97.58                                       | 96.03                                     |
| BRC4  | Normal | 50    | 91.347 Gb   | 24.481           | 97.26                                       | 95.88                                     |
| BRC4  | Tumour | 55    | 105.433 Gb  | 32.882           | 98.55                                       | 97.44                                     |
| BRC5  | Normal | 64    | 124.555 Gb  | 29.759           | 99.09                                       | 98.01                                     |
| BRC5  | Tumour | 64    | 170.612 Gb  | 44.664           | 97.52                                       | 96.59                                     |
| BRC6  | Normal | 45    | 113.223 Gb  | 34.455           | 99.28                                       | 98.47                                     |
| BRC6  | Tumour | 45    | 160.630 Gb  | 45.979           | 98.66                                       | 97.53                                     |
| BRC7  | Normal | 59    | 176.983 Gb  | 33.354           | 99.65                                       | 99.14                                     |
| BRC7  | Tumour | 42    | 125.322 Gb  | 26.752           | 99.1                                        | 98.27                                     |
| BRC8  | Normal | 16    | 102.461 Gb  | 29.933           | 99.1                                        | 98.48                                     |
| BRC8  | Tumour | 18    | 103.710 Gb  | 31.113           | 97.42                                       | 96.54                                     |
| BRC9  | Normal | 16    | 95.327 Gb   | 29.074           | 99.4                                        | 98.76                                     |
| BRC9  | Tumour | 16    | 103.341 Gb  | 31.49            | 98.53                                       | 97.5                                      |
| BRC10 | Normal | 56    | 100.000 Gb  | 27.403           | 98.81                                       | 97.17                                     |
| BRC10 | Tumour | 48    | 104.251 Gb  | 30.312           | 97.23                                       | 95.39                                     |
| BRC11 | Normal | 37    | 110.503 Gb  | 30.75            | 99.19                                       | 98.33                                     |
| BRC11 | Tumour | 44    | 126.853 Gb  | 35.185           | 99.33                                       | 98.58                                     |
| BRC12 | Normal | 72    | 129.696 Gb  | 33.183           | 99.34                                       | 98.54                                     |
| BRC12 | Tumour | 38    | 113.354 Gb  | 28.787           | 97.14                                       | 95.11                                     |
| BRC13 | Normal | 40    | 112.862 Gb  | 31.875           | 99.58                                       | 99.04                                     |
| BRC13 | Tumour | 59    | 156.556 Gb  | 32.54            | 97.94                                       | 97.2                                      |
| BRC14 | Normal | 40    | 135.748 Gb  | 42.171           | 99.41                                       | 98.81                                     |
| BRC14 | Tumour | 40    | 113.264 Gb  | 35.53            | 98.7                                        | 97.61                                     |
| BRC15 | Normal | 40    | 113.779 Gb  | 32.192           | 99.17                                       | 98.51                                     |
| BRC15 | Tumour | 40    | 113.818 Gb  | 34.344           | 98.4                                        | 97.65                                     |
| BRC16 | Normal | 40    | 126.585 Gb  | 38.705           | 99.56                                       | 98.53                                     |
| BRC16 | Tumour | 40    | 123.170 Gb  | 38.879           | 98.78                                       | 97.87                                     |
| BRC17 | Normal | 16    | 90.679 Gb   | 26.96            | 99.34                                       | 98.66                                     |
| BRC17 | Tumour | 20    | 112.146 Gb  | 30.216           | 98.56                                       | 97.68                                     |
| BRC18 | Normal | 19    | 96.719 Gb   | 27.576           | 99.38                                       | 98.76                                     |
| BRC18 | Tumour | 20    | 116.843 Gb  | 32.811           | 99.09                                       | 98.35                                     |
| BRC19 | Normal | 17    | 98.004 Gb   | 27.243           | 99.27                                       | 98.54                                     |

|       |        |    |            |        |       |       |
|-------|--------|----|------------|--------|-------|-------|
| BRC19 | Tumour | 23 | 128.223 Gb | 35.419 | 99.56 | 99.02 |
| BRC20 | Normal | 16 | 93.769 Gb  | 26.164 | 99.39 | 98.78 |
| BRC20 | Tumour | 17 | 103.117 Gb | 30.433 | 97.33 | 96.07 |
| BRC21 | Normal | 16 | 90.725 Gb  | 25.735 | 99.17 | 98.44 |
| BRC21 | Tumour | 28 | 155.572 Gb | 35.29  | 99.42 | 98.86 |
| BRC22 | Normal | 16 | 106.655 Gb | 29.184 | 99.29 | 98.63 |
| BRC22 | Tumour | 20 | 127.673 Gb | 34.984 | 98.74 | 97.88 |
| BRC23 | Normal | 16 | 111.177 Gb | 29.477 | 99.16 | 98.46 |
| BRC23 | Tumour | 18 | 122.696 Gb | 32.74  | 98.79 | 97.93 |
| BRC24 | Normal | 24 | 100.587 Gb | 26.112 | 98.75 | 97.85 |
| BRC24 | Tumour | 29 | 131.223 Gb | 36.18  | 99.22 | 98.57 |
| BRC25 | Normal | 16 | 94.215 Gb  | 27.196 | 99.39 | 98.74 |
| BRC25 | Tumour | 20 | 116.712 Gb | 31.701 | 99.48 | 98.91 |
| BRC26 | Normal | 16 | 99.524 Gb  | 26.355 | 99.18 | 98.45 |
| BRC26 | Tumour | 32 | 175.125 Gb | 34.999 | 99.48 | 98.98 |
| BRC28 | Normal | 16 | 106.529 Gb | 27.418 | 98.83 | 98.02 |
| BRC28 | Tumour | 22 | 138.806 Gb | 34.375 | 99.09 | 98.49 |
| BRC29 | Normal | 20 | 120.610 Gb | 29.703 | 98.78 | 98.04 |
| BRC29 | Tumour | 29 | 167.494 Gb | 38.662 | 97.05 | 95.87 |
| BRC30 | Normal | 16 | 101.750 Gb | 28.733 | 98.35 | 97.44 |
| BRC30 | Tumour | 20 | 132.754 Gb | 37.25  | 99.32 | 98.68 |
| BRC31 | Normal | 16 | 103.046 Gb | 29.327 | 99.32 | 98.65 |
| BRC31 | Tumour | 20 | 146.877 Gb | 40.286 | 98.88 | 98.13 |
| BRC32 | Normal | 20 | 125.735 Gb | 34.362 | 99.68 | 99.25 |
| BRC32 | Tumour | 20 | 128.777 Gb | 34.976 | 99.16 | 98.56 |
| BRC33 | Normal | 18 | 103.760 Gb | 28.728 | 99.57 | 99.09 |
| BRC33 | Tumour | 20 | 132.134 Gb | 36.413 | 99.53 | 99.05 |
| BRC34 | Normal | 16 | 115.028 Gb | 31.264 | 99.16 | 98.41 |
| BRC34 | Tumour | 16 | 114.572 Gb | 30.441 | 98.61 | 97.63 |
| BRC35 | Normal | 16 | 105.900 Gb | 28.958 | 99.16 | 98.49 |
| BRC35 | Tumour | 16 | 108.696 Gb | 29.735 | 96.86 | 95.37 |
| BRC36 | Normal | 16 | 119.231 Gb | 32.438 | 99.23 | 98.68 |
| BRC36 | Tumour | 20 | 141.290 Gb | 38.158 | 98.52 | 97.6  |
| BRC37 | Normal | 24 | 137.748 Gb | 37.437 | 99.33 | 98.7  |
| BRC37 | Tumour | 28 | 144.163 Gb | 40.271 | 98.35 | 97.53 |
| BRC38 | Normal | 32 | 168.143 Gb | 42.928 | 99.58 | 99.05 |
| BRC38 | Tumour | 40 | 199.366 Gb | 50.334 | 99.39 | 98.79 |

|       |        |    |            |        |       |       |
|-------|--------|----|------------|--------|-------|-------|
| BRC39 | Normal | 16 | 103.249 Gb | 29.161 | 99.43 | 98.87 |
| BRC39 | Tumour | 24 | 151.752 Gb | 43.961 | 98.47 | 97.55 |
| BRC40 | Normal | 16 | 108.881 Gb | 30.057 | 98.93 | 98.15 |
| BRC40 | Tumour | 20 | 120.819 Gb | 32.949 | 99.21 | 98.59 |
| BRC41 | Normal | 19 | 114.686 Gb | 31.018 | 99.12 | 98.43 |
| BRC41 | Tumour | 20 | 137.862 Gb | 36.65  | 98.18 | 97.24 |
| BRC42 | Normal | 23 | 122.689 Gb | 26.625 | 99.34 | 98.76 |
| BRC42 | Tumour | 19 | 136.862 Gb | 34.45  | 98.23 | 97.28 |
| BRC44 | Normal | 16 | 106.921 Gb | 29.112 | 99.28 | 98.62 |
| BRC44 | Tumour | 20 | 143.478 Gb | 35.93  | 98.11 | 97.03 |
| BRC47 | Normal | 16 | 104.567 Gb | 29.59  | 98.85 | 98.02 |
| BRC47 | Tumour | 25 | 116.135 Gb | 34.032 | 99.49 | 98.97 |
| BRC48 | Normal | 16 | 100.958 Gb | 29.088 | 99.42 | 98.42 |
| BRC48 | Tumour | 29 | 165.553 Gb | 46.01  | 99.5  | 98.98 |
| BRC49 | Normal | 24 | 131.319 Gb | 35.482 | 99.77 | 99.35 |
| BRC49 | Tumour | 28 | 115.531 Gb | 33.225 | 99.15 | 98.46 |
| BRC50 | Normal | 19 | 102.160 Gb | 29.445 | 99.73 | 99.32 |
| BRC50 | Tumour | 26 | 132.305 Gb | 33.422 | 99.38 | 98.8  |
| BRC51 | Normal | 8  | 126.242 Gb | 29.994 | 99.35 | 98.63 |
| BRC51 | Tumour | 24 | 181.792 Gb | 46.961 | 99.4  | 98.71 |
| BRC52 | Normal | 24 | 123.108 Gb | 36.444 | 99.46 | 99.23 |
| BRC52 | Tumour | 32 | 238.236 Gb | 61.952 | 99.69 | 99.29 |

### Supplementary Table 1: Whole genome sequence coverage

Haploid and diploid coverage estimates are given for 46 whole-genome sequenced cases. “Lanes” indicates number of Illumina lanes generated. “Gbp” indicates total gigabases of sequence generated. Haploid coverage is calculated as the amount of non-redundant mapped read bases divided by the haploid size of the human genome. Diploid coverage is estimated from the fraction of heterozygous SNPs from high-density SNP array data that were present in SAMtools raw (unfiltered) or filtered SNP calls.

| Case  | Sample | Target  | 1x(%)  | 10x(%) | 20x(%) |
|-------|--------|---------|--------|--------|--------|
| BRC3  | Normal | 4296026 | 90.816 | 83.312 | 80.538 |
| BRC3  | Tumour | 4296026 | 91.069 | 83.16  | 80.429 |
| BRC4  | Normal | 5729952 | 91.979 | 82.806 | 79.715 |
| BRC4  | Tumour | 5729952 | 91.394 | 83.2   | 79.716 |
| BRC5  | Normal | 5697397 | 84.553 | 71.43  | 63.569 |
| BRC5  | Tumour | 5697397 | 91.612 | 79.89  | 75.664 |
| BRC6  | Normal | 5038908 | 88.222 | 80.959 | 78.407 |
| BRC6  | Tumour | 5038908 | 92.828 | 83.058 | 80.276 |
| BRC7  | Normal | 4036434 | 90.132 | 82.78  | 80.488 |
| BRC7  | Tumour | 4036434 | 93.298 | 83.93  | 81.251 |
| BRC8  | Normal | 4216306 | 89.123 | 81.178 | 78.696 |
| BRC8  | Tumour | 4216306 | 91.639 | 82.775 | 79.895 |
| BRC9  | Normal | 4379816 | 89.848 | 75.278 | 68.876 |
| BRC9  | Tumour | 4379816 | 91.059 | 82.792 | 79.954 |
| BRC10 | Normal | 3663451 | 93.908 | 87.696 | 85.175 |
| BRC10 | Tumour | 3663451 | 91.794 | 85.246 | 82.657 |
| BRC11 | Normal | 6037709 | 90.815 | 83.712 | 80.966 |
| BRC11 | Tumour | 6022942 | 92.025 | 85.153 | 82.597 |
| BRC12 | Normal | 3850997 | 92.143 | 85.96  | 83.506 |
| BRC12 | Tumour | 3850997 | 91.306 | 84.356 | 81.896 |
| BRC13 | Normal | 5022349 | 91.304 | 86.102 | 84.056 |
| BRC13 | Tumour | 5022349 | 92.467 | 75.627 | 66.953 |
| BRC14 | Normal | 6381814 | 93.064 | 86.863 | 84.672 |
| BRC14 | Tumour | 6381814 | 93.276 | 87.242 | 84.711 |
| BRC15 | Normal | 5046488 | 92.476 | 86.203 | 83.644 |
| BRC15 | Tumour | 5046488 | 92.287 | 85.794 | 83.315 |
| BRC16 | Normal | 6422110 | 92.624 | 86.018 | 83.675 |
| BRC16 | Tumour | 6422110 | 87.581 | 77.336 | 70.64  |
| BRC17 | Normal | 6232240 | 90.037 | 82.329 | 79.509 |
| BRC17 | Tumour | 6232240 | 92.053 | 83.299 | 80.361 |
| BRC18 | Normal | 5999444 | 92.528 | 85.702 | 83.454 |



|       |        |         |        |        |        |
|-------|--------|---------|--------|--------|--------|
| BRC18 | Tumour | 5999444 | 92.375 | 84.863 | 82.077 |
| BRC19 | Normal | 4256081 | 91.081 | 84.037 | 81.664 |
| BRC19 | Tumour | 4256081 | 91.209 | 83.702 | 81.197 |
| BRC20 | Normal | 4858565 | 90.936 | 81.97  | 78.034 |
| BRC20 | Tumour | 4858565 | 90.421 | 82.582 | 79.557 |
| BRC21 | Normal | 6344075 | 90.122 | 83.336 | 80.619 |
| BRC21 | Tumour | 5145893 | 90.937 | 83.334 | 80.68  |
| BRC22 | Normal | 4752350 | 88.763 | 81.515 | 78.879 |
| BRC22 | Tumour | 4761232 | 83.21  | 72.477 | 67.259 |
| BRC23 | Normal | 4963580 | 88.125 | 80.198 | 77.767 |
| BRC23 | Tumour | 4963580 | 93.454 | 81.716 | 78.253 |
| BRC24 | Normal | 5096509 | 88.323 | 80.666 | 77.803 |
| BRC24 | Tumour | 5096509 | 90.297 | 82.798 | 80.081 |
| BRC25 | Normal | 4342531 | 90.356 | 82.805 | 80.066 |
| BRC25 | Tumour | 4342531 | 90.411 | 83.697 | 81.351 |
| BRC26 | Normal | 4702025 | 91.029 | 83.505 | 80.959 |
| BRC26 | Tumour | 4702025 | 91.287 | 83.552 | 80.691 |
| BRC28 | Normal | 4379160 | 89.979 | 82.8   | 80.408 |
| BRC28 | Tumour | 4379160 | 91.191 | 82.916 | 80.275 |
| BRC29 | Normal | 5386071 | 92.338 | 83.786 | 81.317 |
| BRC29 | Tumour | 5386071 | 86.806 | 77.002 | 72.534 |
| BRC30 | Normal | 4951916 | 89.302 | 81.928 | 79.388 |
| BRC30 | Tumour | 4951916 | 89.606 | 82.164 | 79.567 |
| BRC31 | Normal | 6344075 | 89.679 | 82.884 | 80.008 |
| BRC31 | Tumour | 6344075 | 92.884 | 84.378 | 81.601 |
| BRC32 | Normal | 4534390 | 89.468 | 82.02  | 79.408 |
| BRC32 | Tumour | 4534390 | 89.118 | 81.407 | 78.875 |
| BRC33 | Normal | 4656953 | 90.135 | 82.647 | 79.959 |
| BRC33 | Tumour | 4656953 | 92.265 | 83.024 | 80.6   |
| BRC34 | Normal | 4054381 | 90.888 | 83.835 | 81.412 |
| BRC34 | Tumour | 4054381 | 90.484 | 83.599 | 81.425 |
| BRC35 | Normal | 4863230 | 92.004 | 80.816 | 77.318 |
| BRC35 | Tumour | 4863230 | 90.506 | 83.583 | 81.38  |
| BRC36 | Normal | 4560991 | 90.254 | 83.96  | 81.76  |

|       |        |         |        |        |        |
|-------|--------|---------|--------|--------|--------|
| BRC36 | Tumour | 4560991 | 90.349 | 84.174 | 81.831 |
| BRC37 | Normal | 4636616 | 88.7   | 81.736 | 79.454 |
| BRC37 | Tumour | 4636616 | 90.284 | 82.896 | 80.27  |
| BRC38 | Normal | 5127236 | 89.583 | 81.763 | 78.9   |
| BRC38 | Tumour | 5127236 | 89.134 | 81.518 | 79.078 |
| BRC39 | Normal | 7402685 | 92.373 | 85.7   | 83.089 |
| BRC39 | Tumour | 7402685 | 90.948 | 85.824 | 83.343 |
| BRC40 | Normal | 3919953 | 92.089 | 83.167 | 80.815 |
| BRC40 | Tumour | 3919953 | 91.058 | 83.404 | 80.956 |
| BRC41 | Normal | 5439494 | 90.95  | 83.862 | 81.256 |
| BRC41 | Tumour | 5439494 | 90.763 | 83.868 | 81.456 |
| BRC42 | Normal | 4475298 | 90.378 | 80.731 | 78.215 |
| BRC42 | Tumour | 4475298 | 91.613 | 84.205 | 81.911 |
| BRC44 | Normal | 5963404 | 91.948 | 82.419 | 79.777 |
| BRC44 | Tumour | 5963404 | 91.359 | 83.696 | 80.969 |
| BRC47 | Normal | 5086131 | 89.742 | 80.9   | 78.668 |
| BRC47 | Tumour | 5086131 | 90.275 | 83.372 | 80.808 |
| BRC48 | Normal | 4762691 | 90.351 | 78.096 | 73.969 |
| BRC48 | Tumour | 4762691 | 89.735 | 81.861 | 79.181 |
| BRC49 | Normal | 5681102 | 91.988 | 84.124 | 81.429 |
| BRC49 | Tumour | 5681102 | 91.551 | 83.666 | 80.873 |
| BRC50 | Normal | 5657533 | 91.976 | 85.871 | 83.685 |
| BRC50 | Tumour | 5657533 | 92.35  | 85.047 | 82.053 |
| BRC51 | Normal | 6652050 | 90.422 | 79.543 | 75.371 |
| BRC51 | Tumour | 6652050 | 90.516 | 82.503 | 79.033 |
| BRC52 | Normal | 5759032 | 89.889 | 77.925 | 73.133 |
| BRC52 | Tumour | 5759032 | 90.716 | 82.695 | 79.957 |

### Supplementary Table 2: Custom capture sequence coverage

Custom capture validation coverage of putative somatic mutations is reported for the 46 cases in which such data were generated. Shown are the fraction of bases targeted that were covered >1x, >10x, and >20x in each sample.

| <b>Case</b> | <b>Tier1</b> | <b>Tier2</b> | <b>Tier3</b> | <b>SV</b> |
|-------------|--------------|--------------|--------------|-----------|
| BRC3        | 29           | 185          | 656          | 2         |
| BRC4        | 22           | 164          | 810          | 13        |
| BRC5        | 46           | 194          | 1,024        | 27        |
| BRC6        | 18           | 148          | 825          | 30        |
| BRC7        | 57           | 332          | 1,519        | 4         |
| BRC8        | 28           | 152          | 767          | 0         |
| BRC9        | 24           | 119          | 590          | 6         |
| BRC10       | 12           | 81           | 374          | 11        |
| BRC11       | 84           | 605          | 3,370        | 25        |
| BRC12       | 14           | 70           | 372          | 20        |
| BRC13       | 73           | 348          | 1,810        | 12        |
| BRC14       | 16           | 129          | 582          | 7         |
| BRC15       | 34           | 300          | 1,639        | 6         |
| BRC16       | 55           | 360          | 2,025        | 178       |
| BRC17       | 19           | 115          | 529          | 16        |
| BRC18       | 122          | 798          | 3,805        | 1         |
| BRC19       | 15           | 77           | 456          | 0         |
| BRC20       | 38           | 297          | 1,453        | 25        |
| BRC21       | 24           | 161          | 812          | 15        |
| BRC22       | 27           | 126          | 587          | 14        |
| BRC23       | 19           | 90           | 488          | 2         |
| BRC24       | 26           | 112          | 558          | 1         |
| BRC25       | 0            | 9            | 35           | 1         |
| BRC26       | 22           | 215          | 1,065        | 9         |
| BRC28       | 15           | 95           | 435          | 0         |
| BRC29       | 47           | 329          | 1,464        | 6         |
| BRC30       | 27           | 224          | 1,184        | 12        |
| BRC31       | 124          | 799          | 3,939        | 14        |
| BRC32       | 43           | 158          | 764          | 8         |
| BRC33       | 24           | 70           | 420          | 1         |
| BRC34       | 9            | 100          | 377          | 0         |
| BRC35       | 44           | 294          | 1,598        | 19        |
| BRC36       | 28           | 137          | 806          | 9         |
| BRC37       | 21           | 190          | 864          | 10        |

|       |     |       |       |     |
|-------|-----|-------|-------|-----|
| BRC38 | 35  | 177   | 881   | 12  |
| BRC39 | 293 | 1,773 | 9,550 | 3   |
| BRC40 | 22  | 137   | 632   | 0   |
| BRC41 | 97  | 646   | 3,225 | 101 |
| BRC42 | 22  | 107   | 721   | 13  |
| BRC44 | 81  | 591   | 3,136 | 62  |
| BRC47 | 74  | 397   | 2,081 | 24  |
| BRC48 | 12  | 52    | 240   | 0   |
| BRC49 | 26  | 131   | 604   | 22  |
| BRC50 | 149 | 867   | 4,138 | 9   |
| BRC51 | 81  | 458   | 2,205 | 19  |
| BRC52 | 14  | 98    | 541   | 5   |

### Supplementary Table 3: Validated somatic mutations

Validated somatic SNVs in tiers 1, 2, and 3 are shown for the 46 cases having both whole genome sequence data and custom capture validation.

| Study                    | Tumour Type                  | Cases     | Tier 1 SNVs | Mutation Rate |
|--------------------------|------------------------------|-----------|-------------|---------------|
| Ley et al, 2008          | Acute myeloid leukemia (M1)  | 1         | 8           | 0.18          |
| Mardis et al, 2009       | Acute myeloid leukemia (M1)  | 1         | 10          | 0.23          |
| Chapman et al, 2011      | Multiple myeloma             | 23        | 34          | 0.77          |
| Shah et al, 2009*        | Lobular breast cancer        | 1         | 32          | 0.73          |
| Ding et al, 2010         | Basal-like breast cancer     | 1         | 43          | 0.98          |
| <b>Ellis et al, 2011</b> | <b>Luminal breast cancer</b> | <b>46</b> | <b>45.9</b> | <b>1.05</b>   |
| Totoki et al, 2011       | Hepatocellular carcinoma     | 1         | 81          | 1.85          |
| Pleasant et al, 2009**   | Malignant melanoma           | 1         | 292         | 6.65          |
| Pleasant et al, 2009**   | Small-cell lung cancer       | 1         | 134         | 3.05          |
| Lee et al, 2010          | Non-small-cell lung cancer   | 1         | 392         | 8.93          |

\* Mutation rate reflects only non-synonymous SNVs

\*\* Cancer cell line, not primary tumour

### Supplementary Table 4: Mutation rates across cancer types

This table compares somatic mutation rates across cancer types. Average number of somatic mutations per megabase of coding sequence (tier 1) is compared to published whole-genome sequencing studies of liquid and solid tumours. Only validated tier 1 SNVs in 46 cases were used in calculations; for two studies, only numbers of nonsynonymous SNVs were readily available. For studies with multiple cases, the average values are shown.

| Hugo_Symbol | Chromosome | Start_position | End_position | Variant_Classification | Variant_Type | Reference_Allele | Variant_Allele | Tumour_Sample | Transcript     | Annotation |
|-------------|------------|----------------|--------------|------------------------|--------------|------------------|----------------|---------------|----------------|------------|
| ATAD3A      | 1          | 1451715        | 1451715      | Silent                 | SNP          | C                | T              | CSB21         | NM_018188.2    | p.S474     |
| LOC728661   | 1          | 1587306        | 1587306      | Silent                 | SNP          | C                | T              | BRC7          | XM_001717735.1 | p.V489     |
| MORN1       | 1          | 2279898        | 2279898      | Missense               | SNP          | T                | A              | BRC28         | NM_024848.1    | p.T288S    |
| ACTRT2      | 1          | 2928204        | 2928204      | Missense               | SNP          | C                | T              | CSB8          | NM_080431.4    | p.R32W     |
| KIAA0562    | 1          | 3741348        | 3741348      | Splice_Site            | SNP          | C                | A              | CSB24         | NM_014704.2    | e10+1      |
| KIAA0562    | 1          | 3755186        | 3755186      | Missense               | SNP          | C                | G              | BRC39         | NM_014704.2    | p.E45Q     |
| HES2        | 1          | 6401892        | 6401892      | Silent                 | SNP          | C                | A              | CSB14         | NM_019089.4    | p.A79      |
| DNAJC11     | 1          | 6618818        | 6618818      | Missense               | SNP          | C                | T              | CSB34         | NM_018198.3    | p.V534I    |
| PER3        | 1          | 7770837        | 7770837      | Missense               | SNP          | T                | C              | CSB29         | NM_016831.1    | p.F179S    |
| ENO1        | 1          | 8847944        | 8847944      | Missense               | SNP          | G                | C              | BRC11         | NM_001428.2    | p.I284M    |
| ENO1        | 1          | 8848959        | 8848959      | Silent                 | SNP          | G                | A              | BRC41         | NM_001428.2    | p.G211     |
| UBE4B       | 1          | 10161293       | 10161293     | Missense               | SNP          | C                | T              | CSB7          | NM_001105562.1 | p.S1177F   |
| PEX14       | 1          | 10612240       | 10612240     | Missense               | SNP          | C                | A              | BRC47         | NM_004565.2    | p.P248Q    |
| FRAP1       | 1          | 11129401       | 11129401     | Missense               | SNP          | C                | G              | BRC39         | NM_004958.3    | p.M1535I   |
| PTCHD2      | 1          | 11519166       | 11519166     | Missense               | SNP          | G                | A              | CSB9          | NM_020780.1    | p.A1339T   |
| VPS13D      | 1          | 12260042       | 12260042     | Missense               | SNP          | G                | C              | CSB1          | NM_015378.2    | p.L1270F   |
| DHRS3       | 1          | 12561420       | 12561420     | Missense               | SNP          | A                | G              | CSB12         | NM_004753.4    | p.L204P    |
| AADACL3     | 1          | 12708546       | 12708546     | Missense               | SNP          | T                | C              | BRC14         | NM_001103170.1 | p.L350P    |
| PRAMEF18    | 1          | 13347456       | 13347456     | Missense               | SNP          | G                | T              | CSB22         | NM_001099850.1 | p.D420E    |
| KIAA1026    | 1          | 15300735       | 15300735     | Missense               | SNP          | C                | T              | CSB15         | NM_201628.2    | p.R553W    |
| EFHD2       | 1          | 15609339       | 15609339     | Missense               | SNP          | G                | C              | CSB1          | NM_024329.4    | p.K95N     |
| SPEN        | 1          | 16108509       | 16108509     | Nonsense               | SNP          | G                | T              | CSB7          | NM_015001.2    | p.E330*    |
| SPEN        | 1          | 16128033       | 16128033     | Missense               | SNP          | A                | G              | CSB9          | NM_015001.2    | p.D904G    |

|                                 |   |          |          |                                |     |   |     |       |                 |           |
|---------------------------------|---|----------|----------|--------------------------------|-----|---|-----|-------|-----------------|-----------|
| SPEN                            | 1 | 16129139 | 16129139 | Nonsense                       | SNP | G | T   | BRC47 | NM_015001.2     | p.E1273*  |
| SPEN                            | 1 | 16133350 | 16133350 | Silent                         | SNP | G | C   | BRC47 | NM_015001.2     | p.V2676   |
| ARHGEF19<br>ENSG0000018654<br>3 | 1 | 16405149 | 16405149 | Nonsense                       | SNP | C | A   | BRC5  | NM_153213.3     | p.E439*   |
| PADI6                           | 1 | 16832421 | 16832421 | Missense                       | SNP | G | T   | CSB12 | ENST00000362058 | p.A11D    |
| UBR4                            | 1 | 17594191 | 17594191 | Splice_Site                    | SNP | G | A   | BRC6  | ENST00000358481 | e13+1     |
| UBR4                            | 1 | 19314711 | 19314711 | Missense                       | SNP | G | A   | CSB31 | NM_020765.2     | p.R3611C  |
| UBR4                            | 1 | 19345000 | 19345000 | Missense                       | SNP | C | A   | CSB24 | NM_020765.2     | p.G2607W  |
| KIAA0090                        | 1 | 19418728 | 19418728 | Silent                         | SNP | T | A   | CSB25 | NM_015047.1     | p.R908    |
| EIF4G3                          | 1 | 21006493 | 21006493 | Missense                       | SNP | G | T   | BRC26 | NM_003760.3     | p.P1555H  |
| EIF4G3                          | 1 | 21085280 | 21085280 | Splice_Site                    | SNP | C | A   | BRC21 | NM_003760.3     | e12+1     |
| EPHA8                           | 1 | 22775857 | 22775857 | Silent                         | SNP | G | T   | BRC29 | NM_020526.1     | p.R240    |
| EPHB2                           | 1 | 22983964 | 22983964 | Missense                       | SNP | T | A   | BRC16 | NM_004442.6     | p.F207I   |
| LUZP1                           | 1 | 23291091 | 23291091 | Missense                       | SNP | G | A   | BRC7  | NM_033631.1     | p.R751W   |
| HTR1D                           | 1 | 23393159 | 23393159 | Silent                         | SNP | G | A   | BRC50 | NM_000864.4     | p.V47     |
| HNRNPR                          | 1 | 23517576 | 23517576 | Missense                       | SNP | T | C   | BRC47 | NM_001102398.1  | p.E338G   |
| LDLRAP1                         | 1 | 25764282 | 25764282 | Nonsense                       | SNP | C | A   | CSB28 | NM_015627.2     | p.S260*   |
| LDLRAP1                         | 1 | 25765939 | 25765939 | Missense                       | SNP | C | G   | BRC24 | NM_015627.2     | p.R266G   |
| AIM1L                           | 1 | 26536429 | 26536429 | Missense<br>Frame Shift<br>Ins | SNP | G | A   | CSB3  | NM_001039775.2  | p.R180W   |
| ARID1A                          | 1 | 26967041 | 26967041 |                                | INS |   | 0 T | CSB8  | NM_006015.4     | p.Y1054fs |
| ARID1A                          | 1 | 26972065 | 26972065 | Missense                       | SNP | G | A   | BRC11 | NM_006015.4     | p.A1239T  |
| ARID1A                          | 1 | 26978941 | 26978941 | Nonsense                       | SNP | C | T   | BRC18 | NM_006015.4     | p.R1989*  |
| ARID1A                          | 1 | 26979538 | 26979538 | Nonsense                       | SNP | C | T   | CSB23 | NM_006015.4     | p.Q2188*  |
| EYA3                            | 1 | 28234758 | 28234758 | Missense                       | SNP | G | A   | CSB1  | NM_001990.2     | p.S82L    |
| DNAJC8                          | 1 | 28428047 | 28428047 | Silent                         | SNP | G | A   | BRC50 | NM_014280.2     | p.S51     |
| PHACTR4                         | 1 | 28688279 | 28688279 | Missense                       | SNP | C | G   | BRC39 | NM_023923.1     | p.Q601E   |
| RCC1                            | 1 | 28734379 | 28734379 | Silent                         | SNP | G | A   | CSB1  | NM_001048194.1  | p.L218    |
| PTPRU                           | 1 | 29478622 | 29478622 | Missense                       | SNP | C | G   | CSB1  | NM_005704.3     | p.S544C   |
| PTPRU                           | 1 | 29509880 | 29509880 | Splice_Site                    | SNP | G | C   | CSB10 | NM_005704.3     | e20+1     |
| PEF1                            | 1 | 31869024 | 31869024 | Missense                       | SNP | G | A   | BRC15 | NM_012392.2     | p.S211F   |
| KPNA6                           | 1 | 32392775 | 32392775 | Splice_Site                    | SNP | G | C   | BRC50 | NM_012316.4     | e2-1      |
| KPNA6                           | 1 | 32392899 | 32392899 | Missense                       | SNP | G | A   | BRC50 | NM_012316.4     | p.R43Q    |
| EIF3I                           | 1 | 32466924 | 32466924 | Missense                       | SNP | T | A   | CSB10 | NM_003757.2     | p.S217T   |
| FAM167B                         | 1 | 32485734 | 32485734 | Missense                       | SNP | C | T   | BRC16 | NM_032648.2     | p.S42L    |
| SYNC                            | 1 | 32934109 | 32934109 | Silent                         | SNP | G | A   | CSB1  | ENST00000409190 | p.L59     |

|           |   |          |          |                    |     |       |   |        |                 |          |
|-----------|---|----------|----------|--------------------|-----|-------|---|--------|-----------------|----------|
| KIAA1522  | 1 | 33008802 | 33008802 | Missense           | SNP | C     | T | BRC39  | NM_020888.2     | p.R479W  |
| S100BPB   | 1 | 33091299 | 33091299 | Missense           | SNP | C     | G | BRC47  | NM_022753.1     | p.Q353E  |
| RNF19B    | 1 | 33186511 | 33186511 | Silent             | SNP | G     | A | BRC11  | NM_153341.1     | p.I104   |
| PHC2      | 1 | 33592689 | 33592693 | Frame Shift<br>Del | DEL | CGTCT |   | 0 CSB2 | NM_198040.3     | p.E484fs |
| CSMD2     | 1 | 33810747 | 33810747 | Missense           | SNP | C     | T | BRC39  | NM_052896.3     | p.E2572K |
| GJB4      | 1 | 34999629 | 34999629 | Missense           | SNP | G     | A | BRC22  | NM_153212.1     | p.V63I   |
| ZMYM6     | 1 | 35226008 | 35226008 | Missense           | SNP | C     | T | BRC39  | NM_007167.3     | p.E1088K |
| ZMYM1     | 1 | 35351259 | 35351259 | Missense           | SNP | A     | T | BRC23  | NM_024772.3     | p.Q414L  |
| SFPQ      | 1 | 35427248 | 35427248 | Missense           | SNP | C     | G | CSB1   | NM_005066.2     | p.R547T  |
| KIAA0319L | 1 | 35717168 | 35717168 | Missense           | SNP | G     | A | CSB30  | NM_024874.3     | p.S300L  |
| NCDN      | 1 | 35799309 | 35799309 | Missense           | SNP | G     | A | BRC8   | NM_001014839.1  | p.E324K  |
| GNL2      | 1 | 37828989 | 37828989 | Missense           | SNP | C     | G | CSB1   | NM_013285.2     | p.E97Q   |
| CDCA8     | 1 | 37946612 | 37946612 | Missense           | SNP | G     | A | CSB15  | NM_018101.2     | p.R277Q  |
| MACF1     | 1 | 39322506 | 39322506 | Missense           | SNP | G     | A | BRC51  | NM_012090.3     | p.S10N   |
| MACF1     | 1 | 39620367 | 39620367 | Missense           | SNP | T     | A | CSB13  | NM_033044.3     | p.S3042T |
| MACF1     | 1 | 39698993 | 39698993 | Missense           | SNP | G     | C | CSB1   | NM_033044.3     | p.D5598H |
| EDN2      | 1 | 41722365 | 41722365 | Missense           | SNP | C     | G | CSB16  | NM_001956.3     | p.W54S   |
| C1orf84   | 1 | 43661054 | 43661054 | Frame Shift<br>Del | DEL | C     |   | 0 BRC8 | ENST00000406439 | p.Y651fs |
| PTPRF     | 1 | 43836104 | 43836104 | Missense           | SNP | G     | A | CSB10  | NM_002840.3     | p.V638I  |
| PTPRF     | 1 | 43837045 | 43837045 | Nonsense           | SNP | G     | A | BRC31  | NM_002840.3     | p.W729*  |
| PTPRF     | 1 | 43837148 | 43837148 | Missense           | SNP | G     | T | BRC31  | NM_002840.3     | p.D764Y  |
| JMJD2A    | 1 | 43929104 | 43929104 | Missense           | SNP | T     | C | BRC5   | NM_014663.2     | p.V680A  |
| ATP6V0B   | 1 | 44214636 | 44214636 | Silent             | SNP | C     | T | BRC13  | NM_004047.1     | p.V92    |
| ATP6V0B   | 1 | 44214856 | 44214856 | Missense           | SNP | T     | A | BRC29  | NM_004047.1     | p.F96I   |
| C1orf228  | 1 | 44936444 | 44936444 | Missense           | SNP | C     | T | BRC39  | ENST00000357508 | p.A133V  |
| SNORD38A  | 1 | 45016103 | 45016103 | RNA                | SNP | C     | T | BRC18  | NR_001456.1     | NULL     |
| PTCH2     | 1 | 45064581 | 45064581 | Silent             | SNP | C     | G | BRC39  | NM_003738.3     | p.L1014  |
| GPBP1L1   | 1 | 45892822 | 45892822 | Missense           | SNP | G     | C | CSB28  | NM_021639.4     | p.Q153E  |
| TAL1      | 1 | 47458412 | 47458412 | Missense           | SNP | C     | T | BRC37  | NM_003189.2     | p.R188Q  |
| SPATA6    | 1 | 48691373 | 48691373 | Silent             | SNP | G     | T | CSB21  | NM_019073.1     | p.V23    |
| FAF1      | 1 | 50822971 | 50822971 | Missense           | SNP | G     | A | CSB1   | NM_007051.2     | p.S314L  |
| OSBPL9    | 1 | 52022832 | 52022832 | Missense           | SNP | G     | C | CSB15  | NM_148909.3     | p.A617P  |
| NRD1      | 1 | 52029222 | 52029222 | Missense           | SNP | C     | G | BRC39  | NM_002525.1     | p.E1065Q |
| PRPF38A   | 1 | 52643956 | 52643956 | Silent             | SNP | T     | C | CSB28  | NM_032864.3     | p.D49    |



|                 |   |          |          |             |     |   |   |         |                 |          |
|-----------------|---|----------|----------|-------------|-----|---|---|---------|-----------------|----------|
| ZYG11B          | 1 | 53009576 | 53009576 | Nonsense    | SNP | C | T | CSB30   | NM_024646.2     | p.R165*  |
| ZYG11A          | 1 | 53125268 | 53125268 | Nonsense    | SNP | C | T | CSB1    | XM_001133615.1  | p.Q687*  |
| TMEM48          | 1 | 54066378 | 54066378 | Missense    | SNP | G | C | BRC39   | NM_018087.3     | p.Q113E  |
| ENSG00000212670 | 1 | 54342901 | 54342901 | Missense    | SNP | C | T | BRC50   | ENST00000391366 | p.S58L   |
| ENSG00000212670 | 1 | 54343117 | 54343117 | Missense    | SNP | T | C | BRC16   | ENST00000391366 | p.L130S  |
| C1orf175        | 1 | 54924629 | 54924629 | Silent      | SNP | C | T | BRC39   | NM_001039464.2  | p.I877   |
| PARS2           | 1 | 54997200 | 54997200 | Silent      | SNP | G | A | CSB31   | NM_152268.2     | p.L75    |
| USP24           | 1 | 55372652 | 55372652 | Missense    | SNP | A | T | CSB3    | NM_015306.1     | p.V915E  |
| C1orf168        | 1 | 56982417 | 56982417 | Missense    | SNP | C | G | BRC39   | NM_001004303.4  | p.E500Q  |
| C8B             | 1 | 57187831 | 57187831 | Silent      | SNP | T | C | BRC29   | NM_000066.2     | p.K283   |
| OMA1            | 1 | 58744375 | 58744375 | Missense    | SNP | G | A | CSB1    | NM_145243.3     | p.S437F  |
| JUN             | 1 | 59020997 | 59020997 | Missense    | SNP | C | T | CSB1    | NM_002228.3     | p.E112K  |
| JUN             | 1 | 59021055 | 59021055 | Silent      | SNP | C | T | BRC39   | NM_002228.3     | p.P92    |
| JUN             | 1 | 59021223 | 59021223 | Missense    | SNP | C | G | BRC39   | NM_002228.3     | p.Q36H   |
| FGGY            | 1 | 59846152 | 59846152 | Missense    | SNP | G | C | CSB1    | NM_018291.1     | p.Q219H  |
| CYP2J2          | 1 | 60149961 | 60149961 | Silent      | SNP | G | A | CSB8    | NM_000775.2     | p.F197   |
| DOCK7           | 1 | 62731037 | 62731037 | Missense    | SNP | T | C | CSB31   | NM_033407.2     | p.I1732V |
| IL23R           | 1 | 67406362 | 67406362 | Splice_Site | SNP | G | C | CSB1    | NM_144701.2     | e1-1     |
| LRRC40          | 1 | 70417260 | 70417260 | Silent      | SNP | C | T | CSB1    | NM_017768.3     | p.L222   |
| SFRS11          | 1 | 70482996 | 70482996 | Missense    | SNP | C | G | CSB31   | NM_004768.2     | p.S281C  |
| FPGT            | 1 | 74443109 | 74443109 | Missense    | SNP | G | A | CSB1    | NM_003838.2     | p.D264N  |
| C1orf173        | 1 | 74810913 | 74810913 | Silent      | SNP | G | A | CSB1    | NM_001002912.3  | p.F1023  |
| NEXN            | 1 | 78171747 | 78171747 | Missense    | SNP | G | A | CSB2    | NM_144573.3     | p.G416R  |
| IFI44L          | 1 | 78875403 | 78875403 | Missense    | SNP | C | G | CSB1    | NM_006820.2     | p.I286M  |
| TTLL7           | 1 | 84149543 | 84149543 | Missense    | SNP | G | A | CSB1    | NM_024686.4     | p.S560L  |
| SYDE2           | 1 | 85407357 | 85407357 | Missense    | SNP | C | A | CSB2    | NM_032184.1     | p.K937N  |
| SYDE2           | 1 | 85421434 | 85421434 | Silent      | SNP | C | T | BRC42   | NM_032184.1     | p.L493   |
| SH3GLB1         | 1 | 86972912 | 86972912 | Del         | DEL | C |   | 0 CSB26 | NM_016009.3     | p.R204fs |
| CCBL2           | 1 | 89221334 | 89221334 | Missense    | SNP | T | C | BRC23   | NM_019610.1     | p.Y255C  |
| GBP1            | 1 | 89294451 | 89294451 | Missense    | SNP | C | T | CSB34   | NM_002053.2     | p.A402T  |
| LRRC8D          | 1 | 90171639 | 90171639 | Missense    | SNP | G | T | BRC16   | NM_018103.1     | p.D142Y  |
| ZNF644          | 1 | 91177652 | 91177652 | Nonsense    | SNP | G | C | CSB33   | NM_201269.2     | p.S616*  |
| HFM1            | 1 | 91561250 | 91561250 | Missense    | SNP | C | T | BRC20   | NM_001017975.3  | p.R841Q  |

|                 |   |           |           |             |     |   |   |       |                 |          |
|-----------------|---|-----------|-----------|-------------|-----|---|---|-------|-----------------|----------|
| CDC7            | 1 | 91739955  | 91739955  | Missense    | SNP | G | A | BRC18 | NM_003503.1     | p.E32K   |
| GFI1            | 1 | 92714312  | 92714312  | Missense    | SNP | G | C | BRC7  | NM_005263.1     | p.F377L  |
| CCDC18          | 1 | 93474459  | 93474459  | Missense    | SNP | G | A | BRC18 | NM_206886.2     | p.E961K  |
| CCDC18          | 1 | 93477902  | 93477902  | Missense    | SNP | G | C | CSB1  | NM_206886.2     | p.E1066Q |
| DNTTIP2         | 1 | 94115426  | 94115426  | Missense    | SNP | T | C | CSB15 | NM_014597.3     | p.D218G  |
| ABCA4           | 1 | 94234293  | 94234293  | Missense    | SNP | G | A | BRC39 | NM_000350.2     | p.P2259L |
| ABCA4           | 1 | 94298714  | 94298714  | Silent      | SNP | C | A | BRC42 | NM_000350.2     | p.S709   |
| DPYD            | 1 | 97688211  | 97688211  | Missense    | SNP | G | A | BRC39 | NM_000110.3     | p.P633S  |
| CCDC76          | 1 | 100386082 | 100386082 | Missense    | SNP | G | A | BRC39 | NM_019083.1     | p.E288K  |
| S1PR1           | 1 | 101477779 | 101477779 | Silent      | SNP | C | A | BRC35 | NM_001400.4     | p.I217   |
| LOC100129138    | 1 | 104417624 | 104417624 | RNA         | SNP | G | A | BRC22 | XR_036957.1     | NULL     |
| PRMT6           | 1 | 107401027 | 107401027 | Missense    | SNP | T | C | CSB34 | ENST00000370078 | p.V56A   |
| NTNG1           | 1 | 107774894 | 107774894 | Splice_Site | SNP | G | A | BRC39 | ENST00000370068 | e5-1     |
| VAV3            | 1 | 108093174 | 108093174 | Missense    | SNP | C | G | CSB1  | NM_006113.1     | p.E481Q  |
| NBPF4           | 1 | 108570881 | 108570881 | Silent      | SNP | C | T | CSB2  | ENST00000370038 | p.P606   |
| ATXN7L2         | 1 | 109831223 | 109831223 | Nonsense    | SNP | C | T | CSB1  | NM_153340.4     | p.Q124*  |
| AMIGO1          | 1 | 109851628 | 109851628 | Missense    | SNP | G | A | CSB8  | NM_020703.2     | p.S477L  |
| AMIGO1          | 1 | 109851696 | 109851696 | Missense    | SNP | G | C | BRC41 | NM_020703.2     | p.N454K  |
| RBM15           | 1 | 110685517 | 110685517 | Missense    | SNP | C | A | CSB1  | NM_022768.4     | p.S656Y  |
| HBXIP           | 1 | 110751860 | 110751860 | Missense    | SNP | C | T | CSB22 | NM_006402.2     | p.R51Q   |
| KCNA2           | 1 | 110948683 | 110948683 | Missense    | SNP | C | A | BRC21 | NM_004974.2     | p.R82L   |
| TMEM77          | 1 | 111464792 | 111464792 | Missense    | SNP | A | C | BRC28 | NM_178454.4     | p.F129C  |
| WNT2B           | 1 | 112859117 | 112859117 | Missense    | SNP | G | A | CSB14 | NM_024494.3     | p.R94H   |
| LRIG2           | 1 | 113458886 | 113458886 | Nonsense    | SNP | G | T | BRC11 | NM_014813.1     | p.E799*  |
| PTPN22          | 1 | 114196217 | 114196217 | Missense    | SNP | C | G | CSB1  | NM_015967.3     | p.L261F  |
| C1orf178        | 1 | 114225250 | 114225250 | Nonsense    | SNP | G | A | CSB28 | ENST00000393320 | p.R55*   |
| DENND2C         | 1 | 114966182 | 114966182 | Missense    | SNP | G | A | BRC47 | ENST00000369539 | p.R362W  |
| LOC401131       | 1 | 142051337 | 142051337 | RNA         | SNP | C | T | CSB7  | XR_017704.1     | NULL     |
| LOC727820       | 1 | 142534670 | 142534670 | RNA         | SNP | A | G | CSB24 | XR_041980.1     | NULL     |
| NBPF8           | 1 | 144035013 | 144035013 | Missense    | SNP | A | T | CSB24 | ENST00000369330 | p.I301F  |
| PRKAB2          | 1 | 145106134 | 145106134 | Silent      | SNP | G | A | BRC35 | NM_005399.3     | p.L53    |
| ENSG00000199879 | 1 | 146202453 | 146202453 | RNA         | SNP | C | T | BRC18 | ENST00000363009 | NULL     |
| HIST2H2AC       | 1 | 148125193 | 148125193 | Silent      | SNP | C | G | CSB19 | NM_003517.2     | p.A15    |
| OTUD7B          | 1 | 148188702 | 148188702 | Missense    | SNP | G | A | CSB1  | NM_020205.2     | p.H298Y  |

|          |   |           |           |             |     |   |   |       |                 |          |
|----------|---|-----------|-----------|-------------|-----|---|---|-------|-----------------|----------|
| C1orf51  | 1 | 148525918 | 148525918 | Missense    | SNP | G | A | CSB1  | NM_144697.2     | p.M362I  |
| ADAMTSL4 | 1 | 148793198 | 148793198 | Missense    | SNP | A | C | BRC29 | NM_019032.4     | p.E369D  |
| ADAMTSL4 | 1 | 148796364 | 148796364 | Missense    | SNP | C | G | CSB25 | NM_019032.4     | p.T659R  |
| CTSK     | 1 | 149045894 | 149045894 | Silent      | SNP | G | C | CSB1  | NM_000396.2     | p.L4     |
| BNIP1    | 1 | 149276692 | 149276692 | Missense    | SNP | G | C | BRC18 | NM_138278.2     | p.E23Q   |
| THEM5    | 1 | 150090198 | 150090198 | Missense    | SNP | G | A | BRC32 | NM_182578.2     | p.S140L  |
| TCHH     | 1 | 150353084 | 150353084 | Silent      | SNP | G | A | BRC19 | NM_007113.2     | p.L33    |
| RPTN     | 1 | 150395664 | 150395664 | Missense    | SNP | C | T | BRC32 | ENST00000316073 | p.D179N  |
| FLG      | 1 | 150547627 | 150547627 | Missense    | SNP | T | A | CSB29 | NM_002016.1     | p.D2120V |
| FLG      | 1 | 150548655 | 150548655 | Silent      | SNP | G | A | CSB14 | NM_002016.1     | p.S1777  |
| FLG2     | 1 | 150590405 | 150590405 | Missense    | SNP | C | A | CSB22 | NM_001014342.2  | p.G2161C |
| FLG2     | 1 | 150596266 | 150596266 | Missense    | SNP | C | G | BRC39 | NM_001014342.2  | p.R207T  |
| LCE1C    | 1 | 151044335 | 151044335 | Missense    | SNP | G | A | CSB1  | NM_178351.3     | p.R82C   |
| PGLYRP4  | 1 | 151584452 | 151584452 | Missense    | SNP | G | A | CSB1  | NM_020393.2     | p.S57F   |
| DENND4B  | 1 | 152176602 | 152176602 | Missense    | SNP | G | A | BRC31 | NM_014856.2     | p.R740C  |
| CRTC2    | 1 | 152187259 | 152187259 | Silent      | SNP | G | A | BRC29 | NM_181715.1     | p.L678   |
| CRTC2    | 1 | 152188220 | 152188220 | Missense    | SNP | C | T | BRC44 | NM_181715.1     | p.G557R  |
| CREB3L4  | 1 | 152208130 | 152208130 | Missense    | SNP | C | T | BRC16 | NM_130898.2     | p.S92F   |
| TPM3     | 1 | 152411204 | 152411204 | Missense    | SNP | G | T | BRC41 | ENST00000368545 | p.S137R  |
| SHE      | 1 | 152740602 | 152740602 | Silent      | SNP | C | A | CSB19 | NM_001010846.1  | p.A175   |
| KCNN3    | 1 | 153011131 | 153011131 | Silent      | SNP | G | C | CSB1  | NM_002249.4     | p.L464   |
| PBXIP1   | 1 | 153184713 | 153184713 | Silent      | SNP | G | A | BRC31 | NM_020524.2     | p.F687   |
| PYGO2    | 1 | 153197900 | 153197900 | Silent      | SNP | C | G | BRC41 | NM_138300.3     | p.L400   |
| GBA      | 1 | 153473853 | 153473853 | Missense    | SNP | C | T | BRC8  | NM_000157.2     | p.R301H  |
| C1orf2   | 1 | 153490547 | 153490547 | Silent      | SNP | G | C | BRC18 | NM_006589.2     | p.L115   |
| ASH1L    | 1 | 153675245 | 153675245 | Silent      | SNP | G | A | CSB16 | NM_018489.2     | p.C1775  |
| SYT11    | 1 | 154117657 | 154117657 | Missense    | SNP | G | A | BRC31 | NM_152280.3     | p.A344T  |
| UBQLN4   | 1 | 154280567 | 154280567 | Missense    | SNP | C | G | CSB1  | NM_020131.3     | p.E324D  |
| MEF2D    | 1 | 154713464 | 154713464 | Silent      | SNP | G | T | BRC18 | NM_005920.2     | p.I273   |
| SH2D2A   | 1 | 155043683 | 155043683 | Missense    | SNP | C | T | BRC47 | NM_003975.2     | p.A361T  |
| INSRR    | 1 | 155078688 | 155078688 | Splice_Site | SNP | C | G | CSB1  | NM_014215.1     | e19-1    |
| INSRR    | 1 | 155082153 | 155082153 | Missense    | SNP | C | A | BRC13 | NM_014215.1     | p.D686Y  |
| INSRR    | 1 | 155083100 | 155083100 | Missense    | SNP | C | G | BRC50 | NM_014215.1     | p.E549Q  |
| NTRK1    | 1 | 155111420 | 155111420 | Silent      | SNP | C | T | CSB1  | NM_002529.1     | p.I450   |
| ETV3L    | 1 | 155334357 | 155334357 | Silent      | SNP | C | T | BRC39 | NM_001004341.1  | p.L178   |

|           |   |           |           |              |     |                                |   |       |                 |             |                             |
|-----------|---|-----------|-----------|--------------|-----|--------------------------------|---|-------|-----------------|-------------|-----------------------------|
| FCRL4     | 1 | 155825684 | 155825684 | Nonsense     | SNP | C                              | A | CSB7  | NM_031282.1     | p.G81*      |                             |
| FCRL2     | 1 | 155984998 | 155984998 | Missense     | SNP | C                              | G | CSB24 | NM_138738.2     | p.Q223H     |                             |
| FCRL1     | 1 | 156036476 | 156036476 | Missense     | SNP | G                              | A | BRC26 | NM_052938.3     | p.L343F     |                             |
| LOC649203 | 1 | 156103939 | 156103939 | Missense     | SNP | A                              | T | BRC35 | XM_001725511.1  | p.K160N     |                             |
| CD1D      | 1 | 156418068 | 156418068 | Silent       | SNP | A                              | C | CSB2  | NM_001766.3     | p.I87       |                             |
| CD1E      | 1 | 156592937 | 156592937 | Missense     | SNP | G                              | C | CSB1  | NM_001042584.1  | p.D276H     |                             |
| SPTA1     | 1 | 156885048 | 156885048 | Missense     | SNP | C                              | G | CSB5  | NM_003126.2     | p.E1197Q    |                             |
| SPTA1     | 1 | 156914151 | 156914151 | Missense     | SNP | G                              | A | BRC50 | NM_003126.2     | p.H304Y     |                             |
| OR6K6     | 1 | 156991268 | 156991268 | Silent       | SNP | T                              | C | BRC11 | NM_001005184.1  | p.Y13       |                             |
| OR6N1     | 1 | 157002998 | 157002998 | Silent       | SNP | G                              | A | CSB24 | NM_001005185.1  | p.L33       |                             |
| MNDA      | 1 | 157080469 | 157080469 | Missense     | SNP | C                              | G | BRC16 | NM_002432.1     | p.A168G     |                             |
| OR10J1    | 1 | 157676265 | 157676265 | Silent       | SNP | C                              | T | CSB6  | NM_012351.1     | p.F31       |                             |
| KCNJ10    | 1 | 158277964 | 158277964 | Missense     | SNP | C                              | G | BRC7  | NM_002241.3     | p.S328T     |                             |
| IGSF8     | 1 | 158331315 | 158331315 | Missense     | SNP | A                              | C | BRC11 | NM_052868.2     | p.L137R     |                             |
| ATP1A2    | 1 | 158372668 | 158372668 | Missense     | SNP | C                              | A | CSB3  | NM_000702.3     | p.A816D     |                             |
| NCSTN     | 1 | 158593111 | 158593111 | Silent       | SNP | C                              | T | BRC39 | NM_015331.2     | p.V579      |                             |
| CD84      | 1 | 158787439 | 158787439 | Silent       | SNP | T                              | C | BRC16 | NM_003874.2     | p.S257      |                             |
| NIT1      | 1 | 159355666 | 159355666 | Missense     | SNP | G                              | C | BRC18 | NM_005600.1     | p.E73Q      |                             |
| NR1I3     | 1 | 159469743 | 159469743 | Missense     | SNP | G                              | A | BRC48 | NM_001077482.1  | p.S83L      |                             |
| DDR2      | 1 | 161009903 | 161009903 | Missense     | SNP | G                              | T | CSB22 | NM_001014796.1  | p.E583D     |                             |
| LMX1A     | 1 | 163449606 | 163449606 | Missense     | SNP | C                              | G | BRC5  | NM_177398.1     | p.G189R     |                             |
| RXRG      | 1 | 163637140 | 163637140 | Missense     | SNP | G                              | A | BRC31 | NM_006917.1     | p.P459L     |                             |
| FAM78B    | 1 | 164306265 | 164306265 | Missense     | SNP | C                              | T | BRC32 | NM_001017961.2  | p.R208Q     |                             |
| ILDR2     | 1 | 165171240 | 165171240 | Missense     | SNP | G                              | C | CSB25 | NM_199351.1     | p.P268A     |                             |
| MAEL      | 1 | 165252131 | 165252131 | Silent       | SNP | T                              | C | CSB9  | NM_032858.1     | p.V298      |                             |
| ADCY10    | 1 | 166065273 | 166065273 | Silent       | SNP | C                              | A | BRC21 | NM_018417.3     | p.L1202     |                             |
| BLZF1     | 1 | 167612580 | 167612580 | Silent       | SNP | C                              | T | BRC30 | NM_003666.2     | p.L69       |                             |
| BLZF1     | 1 | 167618062 | 167618062 | Silent       | SNP | A                              | C | BRC23 | NM_003666.2     | p.G312      |                             |
| F5        | 1 | 167786540 | 167786557 | In Frame Del | DEL | GAGAAG<br>GTC<br>ACTCCAT<br>GA |   | 0     | CSB31           | NM_000130.4 | p.HGVTF544<br>8in Frame del |
| C1orf112  | 1 | 168041825 | 168041825 | Missense     | SNP | C                              | T | BRC51 | NM_018186.2     | p.H179Y     |                             |
| LOC646804 | 1 | 169319434 | 169319434 | Missense     | SNP | C                              | A | CSB27 | XM_929761.1     | p.P60T      |                             |
| BAT2D1    | 1 | 169771979 | 169771979 | Missense     | SNP | C                              | T | CSB1  | ENST00000392080 | p.S742F     |                             |
| BAT2D1    | 1 | 169793633 | 169793633 | Missense     | SNP | C                              | A | BRC44 | ENST00000392080 | p.P1918T    |                             |

|          |   |           |           |                    |     |   |     |       |                 |           |
|----------|---|-----------|-----------|--------------------|-----|---|-----|-------|-----------------|-----------|
| C1orf9   | 1 | 170806444 | 170806444 | Missense           | SNP | A | T   | BRC42 | NM_016227.3     | p.I492L   |
| C1orf9   | 1 | 170825149 | 170825149 | Missense           | SNP | C | T   | BRC48 | NM_016227.3     | p.S913L   |
| C1orf9   | 1 | 170825670 | 170825670 | Silent             | SNP | C | T   | CSB1  | NM_016227.3     | p.L1087   |
| KLHL20   | 1 | 171989049 | 171989049 | Silent             | SNP | C | T   | CSB1  | NM_014458.3     | p.I277    |
| TNN      | 1 | 173364412 | 173364412 | Silent             | SNP | C | T   | CSB33 | NM_022093.1     | p.A1079   |
| TNR      | 1 | 173600998 | 173600998 | Silent             | SNP | G | A   | BRC41 | NM_003285.2     | p.T786    |
| PAPPA2   | 1 | 175005505 | 175005505 | Missense           | SNP | G | A   | CSB16 | NM_020318.2     | p.R1488H  |
| ASTN1    | 1 | 175268400 | 175268400 | Missense           | SNP | G | C   | CSB1  | NM_004319.1     | p.S227C   |
| ASTN1    | 1 | 175268533 | 175268533 | Missense           | SNP | G | A   | CSB3  | NM_004319.1     | p.R183C   |
| FAM5B    | 1 | 175493127 | 175493127 | Missense           | SNP | C | T   | BRC29 | NM_021165.2     | p.A218V   |
| RASAL2   | 1 | 176677383 | 176677383 | Missense           | SNP | G | A   | CSB10 | NM_170692.2     | p.R284H   |
| RASAL2   | 1 | 176694250 | 176694250 | Missense           | SNP | G | A   | BRC39 | NM_170692.2     | p.R1056K  |
| TDRD5    | 1 | 177871622 | 177871622 | Silent             | SNP | C | T   | CSB1  | NM_173533.2     | p.L499    |
| CEP350   | 1 | 178250157 | 178250157 | Missense           | SNP | C | T   | BRC11 | NM_014810.4     | p.S648F   |
| CEP350   | 1 | 178256179 | 178256179 | Missense           | SNP | G | C   | CSB1  | NM_014810.4     | p.D882H   |
| IER5     | 1 | 179324712 | 179324712 | Silent             | SNP | G | A   | BRC18 | NM_016545.4     | p.K17     |
| CACNA1E  | 1 | 179816366 | 179816366 | Missense           | SNP | G | C   | CSB1  | NM_000721.2     | p.G261A   |
| CACNA1E  | 1 | 180011958 | 180011958 | Silent             | SNP | C | T   | CSB3  | NM_000721.2     | p.R1746   |
| ZNF648   | 1 | 180292762 | 180292762 | Missense           | SNP | G | C   | BRC41 | NM_001009992.1  | p.P336R   |
| DHX9     | 1 | 181117312 | 181117312 | Missense           | SNP | G | A   | BRC39 | NM_001357.3     | p.E941K   |
| DHX9     | 1 | 181122878 | 181122878 | Frame Shift<br>Ins | INS |   | 0 A | CSB20 | NM_001357.3     | p.Y1167fs |
| LAMC1    | 1 | 181376261 | 181376261 | Missense           | SNP | G | A   | CSB15 | NM_002293.3     | p.G1525R  |
| LAMC2    | 1 | 181479081 | 181479081 | Missense           | SNP | G | A   | BRC39 | NM_005562.2     | p.D1169N  |
| EDEM3    | 1 | 182943947 | 182943947 | Missense           | SNP | G | A   | CSB16 | NM_025191.3     | p.P624L   |
| IVNS1ABP | 1 | 183535829 | 183535829 | Missense           | SNP | G | C   | BRC18 | NM_006469.4     | p.Q476E   |
| IVNS1ABP | 1 | 183536856 | 183536856 | Missense           | SNP | G | A   | CSB13 | NM_006469.4     | p.P331S   |
| HMCN1    | 1 | 184387095 | 184387095 | Missense           | SNP | C | T   | CSB1  | NM_031935.2     | p.R4917C  |
| PLA2G4A  | 1 | 185213476 | 185213476 | Silent             | SNP | G | A   | BRC50 | NM_024420.2     | p.E631    |
| RGS1     | 1 | 190814911 | 190814911 | Nonsense           | SNP | C | T   | CSB9  | NM_002922.3     | p.R156*   |
| KCNT2    | 1 | 194562469 | 194562469 | Splice_Site        | SNP | C | T   | BRC9  | NM_198503.2     | e19+1     |
| CFH      | 1 | 194915529 | 194915529 | Missense           | SNP | C | T   | CSB7  | NM_000186.3     | p.P258L   |
| CFHR5    | 1 | 195213401 | 195213401 | Missense           | SNP | G | A   | BRC47 | ENST00000367414 | p.R19Q    |
| ASPM     | 1 | 195327742 | 195327742 | Missense           | SNP | G | A   | CSB16 | NM_018136.4     | p.A3121V  |
| ASPM     | 1 | 195336587 | 195336587 | Missense           | SNP | G | A   | CSB1  | NM_018136.4     | p.S2806L  |

|          |   |           |           |                    |     |    |   |       |                 |          |
|----------|---|-----------|-----------|--------------------|-----|----|---|-------|-----------------|----------|
| ASPM     | 1 | 195378966 | 195378967 | Frame Shift<br>Del | DEL | TA | 0 | CSB1  | NM_018136.4     | p.D346fs |
| CRB1     | 1 | 195670722 | 195670722 | Missense           | SNP | G  | A | CSB1  | NM_201253.1     | p.E1036K |
| NEK7     | 1 | 196498385 | 196498385 | Missense           | SNP | C  | G | BRC13 | NM_133494.2     | p.L86V   |
| PTPRC    | 1 | 196935355 | 196935355 | Missense           | SNP | C  | T | BRC47 | NM_002838.3     | p.A111V  |
| KIF14    | 1 | 198800999 | 198800999 | Missense           | SNP | A  | G | CSB14 | NM_014875.2     | p.S1298P |
| PPP1R12B | 1 | 200676456 | 200676456 | Splice_Site        | SNP | G  | A | BRC35 | NM_032105.2     | e11-1    |
| SYT2     | 1 | 200838284 | 200838284 | Missense           | SNP | C  | T | BRC17 | NM_177402.1     | p.V160I  |
| JARID1B  | 1 | 200965597 | 200965597 | Missense           | SNP | C  | T | BRC13 | NM_006618.3     | p.R1453K |
| JARID1B  | 1 | 201044110 | 201044110 | Missense           | SNP | G  | T | BRC11 | ENST00000235790 | p.R119S  |
| CHI3L1   | 1 | 201416316 | 201416316 | Missense           | SNP | G  | C | CSB1  | NM_001276.2     | p.L267V  |
| CHIT1    | 1 | 201461560 | 201461560 | Silent             | SNP | A  | T | BRC41 | NM_003465.2     | p.A39    |
| OPTC     | 1 | 201735500 | 201735500 | Missense           | SNP | G  | C | BRC18 | NM_014359.3     | p.E210D  |
| REN      | 1 | 202391978 | 202391978 | Missense           | SNP | G  | A | BRC31 | NM_000537.3     | p.S304F  |
| PLEKHA6  | 1 | 202503271 | 202503271 | Nonsense           | SNP | T  | A | CSB29 | NM_014935.2     | p.K79*   |
| CNTN2    | 1 | 203295366 | 203295366 | Missense           | SNP | C  | T | CSB10 | NM_005076.2     | p.R244W  |
| TMCC2    | 1 | 203492159 | 203492159 | Missense           | SNP | G  | A | BRC11 | ENST00000367159 | p.E7K    |
| TMCC2    | 1 | 203507603 | 203507603 | Missense           | SNP | G  | C | CSB1  | NM_014858.2     | p.E620Q  |
| DYRK3    | 1 | 204888754 | 204888754 | Missense           | SNP | C  | G | BRC50 | NM_003582.1     | p.L530V  |
| C1orf116 | 1 | 205267472 | 205267472 | Missense           | SNP | C  | G | CSB32 | NM_023938.1     | p.R32P   |
| CR1      | 1 | 205766766 | 205766766 | Frame Shift<br>Del | DEL | G  | 0 | BRC16 | NM_000651.3     | p.D312fs |
| PLXNA2   | 1 | 206300653 | 206300653 | Splice_Site        | SNP | C  | T | CSB22 | NM_025179.3     | e12+1    |
| PLXNA2   | 1 | 206457695 | 206457695 | Missense           | SNP | C  | T | BRC38 | NM_025179.3     | p.A66T   |
| TRAF3IP3 | 1 | 208012939 | 208012939 | Silent             | SNP | G  | A | CSB1  | NM_025228.1     | p.L222   |
| C1orf97  | 1 | 209631906 | 209631906 | Missense           | SNP | C  | G | BRC15 | ENST00000367003 | p.S58W   |
| SMYD2    | 1 | 212558106 | 212558106 | Splice_Site        | SNP | G  | A | BRC40 | NM_020197.2     | e4+1     |
| PTPN14   | 1 | 212651687 | 212651687 | Missense           | SNP | G  | A | CSB1  | NM_005401.3     | p.S158F  |
| CENPF    | 1 | 212880170 | 212880170 | Nonsense           | SNP | G  | A | CSB22 | NM_016343.3     | p.W622*  |
| KCTD3    | 1 | 213826567 | 213826567 | Missense           | SNP | G  | C | BRC31 | NM_016121.3     | p.D245H  |
| SPATA17  | 1 | 215981967 | 215981967 | Missense           | SNP | G  | A | BRC39 | NM_138796.2     | p.M141I  |
| TGFB2    | 1 | 216674305 | 216674305 | Silent             | SNP | A  | C | CSB34 | NM_003238.1     | p.R216   |
| DUSP10   | 1 | 219979492 | 219979492 | Missense           | SNP | C  | A | BRC26 | NM_007207.3     | p.C73F   |
| HHIPL2   | 1 | 220763608 | 220763608 | Missense           | SNP | C  | G | BRC50 | NM_024746.3     | p.K619N  |
| HHIPL2   | 1 | 220766967 | 220766967 | Missense           | SNP | C  | T | BRC8  | NM_024746.3     | p.R591H  |
| MIA3     | 1 | 220868308 | 220868308 | Missense           | SNP | G  | C | BRC18 | NM_198551.2     | p.D375H  |

|                     |   |           |           |                    |     |                       |       |       |                 |                                  |
|---------------------|---|-----------|-----------|--------------------|-----|-----------------------|-------|-------|-----------------|----------------------------------|
| DISP1               | 1 | 221234883 | 221234883 | Missense           | SNP | C                     | A     | CSB2  | NM_032890.2     | p.S308Y                          |
| DISP1               | 1 | 221242949 | 221242949 | Silent             | SNP | G                     | A     | CSB1  | NM_032890.2     | p.L529                           |
| LBR                 | 1 | 223672336 | 223672336 | Silent             | SNP | G                     | C     | BRC51 | NM_002296.2     | p.V270                           |
| LEFTY1              | 1 | 224141763 | 224141763 | Missense           | SNP | C                     | A     | BRC30 | NM_020997.2     | p.E232D                          |
| MIXL1               | 1 | 224480043 | 224480043 | Silent             | SNP | G                     | A     | BRC18 | NM_031944.1     | p.Q202                           |
| ITPKB               | 1 | 224990644 | 224990644 | Missense           | SNP | C                     | G     | BRC29 | NM_002221.3     | p.G380A                          |
| CABC1               | 1 | 225240827 | 225240827 | Silent             | SNP | C                     | T     | CSB1  | NM_020247.4     | p.F570                           |
| ZNF678              | 1 | 225909839 | 225909839 | Missense           | SNP | G                     | T     | BRC29 | NM_178549.2     | p.S422I                          |
| OBSCN               | 1 | 226560801 | 226560801 | Nonsense           | SNP | G                     | A     | CSB1  | NM_001098623.1  | p.W3922*                         |
| OBSCN               | 1 | 226573579 | 226573579 | Splice_Site        | SNP | G                     | A     | BRC22 | NM_001098623.1  | e54+1                            |
| OBSCN               | 1 | 226615000 | 226615000 | Missense           | SNP | T                     | C     | BRC21 | NM_052843.1     | p.V6595A                         |
| ABCB10              | 1 | 227728343 | 227728343 | Silent             | SNP | G                     | A     | BRC7  | NM_012089.2     | p.F623                           |
| URB2                | 1 | 227838385 | 227838385 | Missense           | SNP | C                     | T     | CSB24 | NM_014777.2     | p.R468W                          |
| LOC100129238        | 1 | 228201806 | 228201806 | Missense           | SNP | G                     | C     | BRC39 | XM_001716016.1  | p.E295Q<br>p.105in<br>Frame insS |
| AGT                 | 1 | 228912907 | 228912907 | In Frame Ins       | INS |                       | 0 TGC | BRC40 | NM_000029.3     |                                  |
| TTC13               | 1 | 229118654 | 229118654 | Silent             | SNP | C                     | T     | CSB1  | NM_024525.1     | p.T667                           |
| C1orf124            | 1 | 229553931 | 229553931 | Missense           | SNP | G                     | C     | CSB1  | NM_032018.1     | p.E237Q                          |
| EGLN1               | 1 | 229568776 | 229568788 | Frame Shift<br>Del | DEL | GGCTCT<br>A<br>GAAGAC | 0     | BRC35 | NM_022051.1     | p.V425fs                         |
| DISC1               | 1 | 230228879 | 230228879 | Missense           | SNP | C                     | G     | BRC31 | NM_018662.1     | p.Q795E                          |
| GGPS1               | 1 | 233572236 | 233572236 | Missense           | SNP | A                     | T     | BRC12 | NM_001037277.1  | p.E143D                          |
| LYST                | 1 | 233927115 | 233927115 | Silent             | SNP | G                     | A     | CSB1  | NM_000081.2     | p.F3485                          |
| LYST                | 1 | 234039168 | 234039168 | Nonsense           | SNP | T                     | A     | BRC41 | NM_000081.2     | p.K525*                          |
| HEATR1              | 1 | 234788383 | 234788383 | Missense           | SNP | C                     | G     | CSB1  | NM_018072.4     | p.E1661Q                         |
| RYR2                | 1 | 235675412 | 235675412 | Missense           | SNP | G                     | A     | BRC8  | NM_001035.2     | p.R420Q                          |
| RYR2                | 1 | 235840889 | 235840889 | Missense           | SNP | C                     | T     | CSB1  | NM_001035.2     | p.L1630F                         |
| RYR2                | 1 | 236021390 | 236021390 | Silent             | SNP | A                     | G     | BRC12 | NM_001035.2     | p.L4505                          |
| CHRM3               | 1 | 238138255 | 238138255 | Missense           | SNP | A                     | G     | CSB14 | NM_000740.2     | p.E294G                          |
| WDR64               | 1 | 239890574 | 239890574 | Missense           | SNP | G                     | A     | BRC18 | ENST00000366552 | p.D89N                           |
| PLD5                | 1 | 240449954 | 240449954 | Missense           | SNP | A                     | C     | CSB19 | NM_152666.1     | p.Y140D                          |
| C1orf71             | 1 | 244877699 | 244877699 | Missense           | SNP | G                     | A     | BRC11 | NM_152609.1     | p.E525K                          |
| ENSG0000020207<br>9 | 1 | 245524842 | 245524842 | RNA                | SNP | C                     | G     | BRC39 | ENST00000365209 | NULL                             |
| LOC644852           | 1 | 245749914 | 245749914 | RNA                | SNP | C                     | G     | BRC39 | XR_040316.1     | NULL                             |
| OR2C3               | 1 | 245761483 | 245761483 | Silent             | SNP | C                     | T     | BRC13 | NM_198074.4     | p.A317                           |



|                     |   |           |           |                    |     |   |   |        |                 |          |
|---------------------|---|-----------|-----------|--------------------|-----|---|---|--------|-----------------|----------|
| OR2L8               | 1 | 246179665 | 246179665 | Missense           | SNP | G | A | BRC33  | NM_001001963.1  | p.E295K  |
| OR2L2               | 1 | 246268445 | 246268445 | Missense           | SNP | C | G | BRC39  | NM_001004686.2  | p.L85V   |
| OR2L2               | 1 | 246268664 | 246268664 | Missense           | SNP | C | T | BRC13  | NM_001004686.2  | p.H158Y  |
| OR2M2               | 1 | 246410114 | 246410114 | Silent             | SNP | C | T | BRC11  | NM_001004688.1  | p.L68    |
| OR2T12              | 1 | 246524825 | 246524825 | Missense           | SNP | G | T | CSB25  | NM_001004692.1  | p.R227S  |
| FAM150B             | 2 | 273152    | 273152    | Missense           | SNP | G | C | CSB24  | NM_001002919.2  | p.L138V  |
| MYT1L               | 2 | 1925842   | 1925842   | Missense           | SNP | C | T | BRC49  | NM_015025.2     | p.D142N  |
| ADI1                | 2 | 3496678   | 3496678   | Silent             | SNP | G | A | BRC39  | NM_018269.2     | p.I66    |
| COLEC11             | 2 | 3668971   | 3668971   | Nonsense           | SNP | C | T | CSB1   | NM_024027.3     | p.Q131*  |
| CPSF3               | 2 | 9490155   | 9490155   | Missense           | SNP | G | C | CSB1   | NM_016207.2     | p.E136Q  |
| TAF1B               | 2 | 9909570   | 9909570   | Missense           | SNP | C | G | BRC41  | ENST00000404869 | p.T109R  |
| ATP6V1C2            | 2 | 10821976  | 10821976  | Missense           | SNP | G | A | BRC51  | NM_001039362.1  | p.V118M  |
| ROCK2               | 2 | 11269351  | 11269351  | Nonsense           | SNP | C | A | CSB15  | NM_004850.3     | p.E704*  |
| KCNS3               | 2 | 17976455  | 17976455  | Silent             | SNP | C | T | BRC15  | NM_002252.3     | p.F233   |
| ENSG0000022227<br>9 | 2 | 20238635  | 20238635  | RNA                | SNP | G | C | BRC18  | ENST00000410347 | NULL     |
| APOB                | 2 | 21083079  | 21083079  | Missense           | SNP | C | G | CSB1   | NM_000384.2     | p.R3389T |
| APOB                | 2 | 21083771  | 21083771  | Missense           | SNP | C | G | CSB1   | NM_000384.2     | p.L3158F |
| APOB                | 2 | 21091841  | 21091841  | Silent             | SNP | G | A | CSB30  | NM_000384.2     | p.L1138  |
| APOB                | 2 | 21099255  | 21099255  | Missense           | SNP | C | A | CSB34  | NM_000384.2     | p.K923N  |
| LOC100129278        | 2 | 21218142  | 21218142  | Missense           | SNP | A | C | BRC44  | XM_001717344.1  | p.K1579T |
| LOC100129278        | 2 | 21219314  | 21219314  | Missense           | SNP | C | T | BRC31  | XM_001717344.1  | p.R1970C |
| ATAD2B              | 2 | 23941231  | 23941231  | Missense           | SNP | G | T | BRC39  | NM_017552.1     | p.P419Q  |
| ATAD2B              | 2 | 23957034  | 23957034  | Nonsense           | SNP | G | A | CSB29  | NM_017552.1     | p.R294*  |
| C2orf44             | 2 | 24115310  | 24115310  | Missense           | SNP | C | G | BRC6   | NM_025203.1     | p.A187P  |
| DNMT3A              | 2 | 25322626  | 25322626  | Missense           | SNP | C | G | BRC44  | NM_022552.3     | p.A446P  |
| RAB10               | 2 | 26204311  | 26204311  | Missense           | SNP | A | G | BRC31  | NM_016131.3     | p.D169G  |
| HADHB               | 2 | 26355537  | 26355537  | Missense           | SNP | G | A | BRC51  | NM_000183.2     | p.E221K  |
| DPYSL5              | 2 | 27011051  | 27011051  | Frame Shift<br>Del | DEL | C |   | 0 CSB2 | NM_020134.3     | p.P298fs |
| AGBL5               | 2 | 27133016  | 27133016  | Nonsense           | SNP | A | T | CSB14  | NM_021831.2     | p.K463*  |
| NRBP1               | 2 | 27510053  | 27510053  | Missense           | SNP | C | T | CSB14  | NM_013392.2     | p.R74W   |
| IFT172              | 2 | 27530484  | 27530484  | Missense           | SNP | G | T | CSB1   | NM_015662.1     | p.H1194N |
| SUPT7L              | 2 | 27729871  | 27729871  | Silent             | SNP | C | T | BRC52  | NM_014860.1     | p.R410   |
| SUPT7L              | 2 | 27737762  | 27737762  | Missense           | SNP | C | G | CSB1   | ENST00000405491 | p.L2F    |
| SLC4A1AP            | 2 | 27754145  | 27754145  | Missense           | SNP | C | T | BRC50  | NM_018158.2     | p.A538V  |



|                 |   |          |          |             |     |   |   |       |                 |          |
|-----------------|---|----------|----------|-------------|-----|---|---|-------|-----------------|----------|
| PLB1            | 2 | 28605767 | 28605767 | Silent      | SNP | C | T | BRC20 | NM_153021.3     | p.H135   |
| PLB1            | 2 | 28682252 | 28682252 | Missense    | SNP | C | G | BRC50 | NM_153021.3     | p.A997G  |
| PLB1            | 2 | 28706992 | 28706992 | Missense    | SNP | C | A | CSB21 | NM_153021.3     | p.S1285Y |
| C2orf71         | 2 | 29147607 | 29147607 | Missense    | SNP | G | A | BRC47 | NM_001029883.1  | p.R1009C |
| C2orf71         | 2 | 29150235 | 29150235 | Nonsense    | SNP | C | A | BRC39 | NM_001029883.1  | p.E133*  |
| LBH             | 2 | 30310842 | 30310842 | Missense    | SNP | G | C | BRC15 | NM_030915.3     | p.G32R   |
| LCLAT1          | 2 | 30644429 | 30644429 | Splice_Site | SNP | G | C | BRC50 | NM_182551.1     | e5-1     |
| LCLAT1          | 2 | 30644486 | 30644486 | Nonsense    | SNP | G | T | BRC50 | NM_182551.1     | p.E228*  |
| BIRC6           | 2 | 32494483 | 32494483 | Missense    | SNP | T | G | BRC5  | NM_016252.3     | p.C874G  |
| BIRC6           | 2 | 32519971 | 32519971 | Missense    | SNP | A | G | BRC42 | NM_016252.3     | p.D1294G |
| BIRC6           | 2 | 32524103 | 32524103 | Silent      | SNP | T | C | BRC12 | NM_016252.3     | p.Y1449  |
| BIRC6           | 2 | 32581365 | 32581365 | Splice_Site | SNP | G | A | BRC15 | NM_016252.3     | e48-1    |
| BIRC6           | 2 | 32591596 | 32591596 | Nonsense    | SNP | C | G | BRC51 | NM_016252.3     | p.S3480* |
| PRKD3           | 2 | 37396937 | 37396937 | Missense    | SNP | C | T | BRC38 | NM_005813.3     | p.E79K   |
| CDC42EP3        | 2 | 37727175 | 37727175 | Missense    | SNP | A | C | BRC39 | NM_006449.3     | p.F20L   |
| HNRPLL          | 2 | 38654047 | 38654047 | Missense    | SNP | G | A | BRC50 | NM_138394.1     | p.P301S  |
| SFRS7           | 2 | 38827373 | 38827373 | Nonsense    | SNP | G | C | BRC39 | NM_001031684.2  | p.S198*  |
| ENSG00000214694 | 2 | 39009587 | 39009587 | Missense    | SNP | C | G | CSB1  | ENST00000409978 | p.F37L   |
| SOS1            | 2 | 39137352 | 39137352 | Missense    | SNP | C | G | BRC47 | NM_005633.3     | p.D169H  |
| MAP4K3          | 2 | 39373428 | 39373428 | Nonsense    | SNP | C | A | CSB9  | NM_003618.2     | p.E421*  |
| EML4            | 2 | 42410471 | 42410471 | Missense    | SNP | G | T | BRC13 | NM_019063.1     | p.D856Y  |
| DYNC2LI1        | 2 | 43885831 | 43885831 | Missense    | SNP | C | T | CSB30 | NM_016008.1     | p.A312V  |
| ABCG8           | 2 | 43952729 | 43952729 | Missense    | SNP | T | C | BRC31 | NM_022437.2     | p.F359L  |
| PRKCE           | 2 | 46082106 | 46082106 | Missense    | SNP | G | T | CSB13 | NM_005400.2     | p.D295Y  |
| MSH6            | 2 | 47884308 | 47884308 | Nonsense    | SNP | A | T | BRC15 | NM_000179.2     | p.K1140* |
| FBXO11          | 2 | 47919529 | 47919529 | Missense    | SNP | C | A | BRC11 | NM_025133.1     | p.S103I  |
| CHAC2           | 2 | 53855101 | 53855101 | Missense    | SNP | C | G | CSB1  | NM_001008708.2  | p.L164V  |
| SPTBN1          | 2 | 54729688 | 54729688 | Missense    | SNP | G | A | BRC8  | NM_003128.2     | p.A1687T |
| EML6            | 2 | 54947510 | 54947510 | Missense    | SNP | T | C | BRC48 | XM_001725001.2  | p.L679P  |
| EML6            | 2 | 54997408 | 54997408 | Missense    | SNP | G | C | CSB1  | XM_001725001.2  | p.K1169N |
| CCDC88A         | 2 | 55413213 | 55413213 | Missense    | SNP | C | T | CSB1  | NM_018084.1     | p.D950N  |
| SMEK2           | 2 | 55679625 | 55679625 | Missense    | SNP | C | T | BRC31 | NM_020463.1     | p.E118K  |
| LOC730134       | 2 | 59330525 | 59330525 | Missense    | SNP | C | A | BRC18 | XM_001132580.1  | p.R9M    |
| ENSG00000222030 | 2 | 59335877 | 59335877 | Missense    | SNP | G | T | BRC50 | ENST00000409590 | p.D17Y   |

|            |   |          |          |                    |     |   |   |         |                 |          |
|------------|---|----------|----------|--------------------|-----|---|---|---------|-----------------|----------|
| REL        | 2 | 60999236 | 60999236 | Missense           | SNP | G | C | BRC50   | NM_002908.2     | p.D282H  |
| XPO1       | 2 | 61573047 | 61573047 | Missense           | SNP | A | G | CSB15   | NM_003400.3     | p.I547T  |
| XPO1       | 2 | 61574594 | 61574594 | Missense           | SNP | G | A | CSB1    | NM_003400.3     | p.S395F  |
| FAM161A    | 2 | 61922777 | 61922777 | Missense           | SNP | G | C | BRC44   | NM_032180.2     | p.L27V   |
| SLC1A4     | 2 | 65091328 | 65091328 | Missense           | SNP | G | A | BRC5    | NM_003038.1     | p.E243K  |
| MEIS1      | 2 | 66651934 | 66651934 | Silent             | SNP | G | A | BRC39   | ENST00000398506 | p.V387   |
| WDR92      | 2 | 68211936 | 68211936 | Missense           | SNP | C | T | BRC18   | NM_138458.2     | p.V338I  |
| SNRNP27    | 2 | 69975784 | 69975784 | Missense           | SNP | G | T | CSB6    | NM_006857.1     | p.R30M   |
| TGFA       | 2 | 70546319 | 70546319 | Frame Shift<br>Del | DEL | T |   | 0 BRC33 | NM_003236.1     | p.H51fs  |
| CLEC4F     | 2 | 70896690 | 70896690 | Missense           | SNP | C | T | BRC17   | NM_173535.2     | p.R444H  |
| CD207      | 2 | 70914646 | 70914646 | Missense           | SNP | C | A | BRC41   | NM_015717.2     | p.M68I   |
| ZNF638     | 2 | 71476824 | 71476824 | Missense           | SNP | C | T | CSB1    | NM_001014972.1  | p.S808F  |
| ZNF638     | 2 | 71507981 | 71507981 | Missense           | SNP | C | T | CSB9    | NM_001014972.1  | p.S1825F |
| DYSF       | 2 | 71644722 | 71644722 | Silent             | SNP | C | T | BRC10   | NM_003494.1     | p.V794   |
| DYSF       | 2 | 71749410 | 71749410 | Missense           | SNP | G | T | BRC3    | NM_003494.1     | p.V1787F |
| ALMS1      | 2 | 73512878 | 73512878 | Missense           | SNP | G | C | BRC39   | NM_015120.4     | p.L461F  |
| ACTG2      | 2 | 73981974 | 73981974 | Missense           | SNP | G | A | BRC6    | NM_001615.3     | p.V10M   |
| DCTN1      | 2 | 74451851 | 74451851 | Silent             | SNP | C | T | BRC26   | ENST00000407639 | p.R27    |
| GCS1       | 2 | 74542416 | 74542416 | Nonsense           | SNP | G | A | CSB1    | NM_006302.2     | p.Q670*  |
| GCS1       | 2 | 74543448 | 74543448 | Missense           | SNP | G | C | CSB1    | NM_006302.2     | p.L326V  |
| TTC31      | 2 | 74573777 | 74573777 | Missense           | SNP | C | G | BRC39   | NM_022492.3     | p.P495R  |
| C2orf3     | 2 | 75754112 | 75754112 | Missense           | SNP | C | G | BRC50   | NM_003203.3     | p.E619Q  |
| REG3A      | 2 | 79239342 | 79239342 | Silent             | SNP | G | C | BRC36   | NM_002580.1     | p.A46    |
| LRRTM1     | 2 | 80383498 | 80383498 | Missense           | SNP | G | A | BRC44   | NM_178839.4     | p.R320C  |
| DNHL1      | 2 | 84624968 | 84624968 | Missense           | SNP | G | C | BRC11   | ENST00000237449 | p.D255H  |
| TCF7L1     | 2 | 85388293 | 85388293 | Silent             | SNP | G | A | BRC39   | NM_031283.1     | p.R425   |
| ELMOD3     | 2 | 85458000 | 85458000 | Silent             | SNP | G | A | CSB8    | NM_032213.1     | p.L210   |
| MAT2A      | 2 | 85622897 | 85622897 | Missense           | SNP | G | C | CSB1    | NM_005911.4     | p.D220H  |
| RNF103     | 2 | 86685495 | 86685495 | Missense           | SNP | C | T | BRC5    | NM_005667.2     | p.G347E  |
| EIF2AK3    | 2 | 88656059 | 88656059 | Missense           | SNP | G | A | CSB1    | NM_004836.4     | p.S686F  |
| LOC647597  | 2 | 91300398 | 91300398 | Silent             | SNP | G | A | CSB24   | XM_001715151.1  | p.D10    |
| CIAO1      | 2 | 96300731 | 96300731 | Missense           | SNP | A | T | CSB15   | NM_004804.2     | p.N312I  |
| uc002swr.2 | 2 | 96681436 | 96681436 | Missense           | SNP | G | C | BRC35   | ENST00000342152 | p.Q125H  |
| FER1L5     | 2 | 96733680 | 96733680 | Missense           | SNP | C | T | BRC26   | NM_001077400.1  | p.R680C  |

|              |   |           |           |                  |     |   |      |       |                 |          |
|--------------|---|-----------|-----------|------------------|-----|---|------|-------|-----------------|----------|
| CNGA3        | 2 | 98379872  | 98379872  | Missense         | SNP | C | T    | BRC50 | NM_001298.1     | p.R603W  |
| INPP4A       | 2 | 98570474  | 98570474  | Missense         | SNP | G | A    | CSB1  | NM_004027.1     | p.E930K  |
| C2orf55      | 2 | 98804827  | 98804827  | Missense         | SNP | C | T    | BRC50 | NM_207362.2     | p.D781N  |
| AFF3         | 2 | 99565845  | 99565845  | Missense         | SNP | G | C    | BRC11 | NM_001025108.1  | p.I905M  |
| LONRF2       | 2 | 100267193 | 100267193 | Nonstop Mutation | SNP | C | G    | BRC39 | NM_198461.3     | p.*755S  |
| LONRF2       | 2 | 100269919 | 100269919 | Silent           | SNP | G | A    | BRC5  | NM_198461.3     | p.H653   |
| uc002tbb.1   | 2 | 101385384 | 101385384 | Silent           | SNP | G | A    | BRC51 | ENST00000376826 | p.S97    |
| MAP4K4       | 2 | 101870151 | 101870151 | Missense         | SNP | C | G    | BRC39 | NM_004834.3     | p.S1038C |
| IL1R2        | 2 | 101992463 | 101992463 | Silent           | SNP | C | A    | BRC16 | NM_004633.3     | p.A25    |
| IL1R2        | 2 | 101998801 | 101998801 | Silent           | SNP | C | T    | BRC39 | NM_004633.3     | p.L123   |
| LOC100131131 | 2 | 102104034 | 102104034 | Silent           | SNP | C | T    | BRC24 | XM_001720712.1  | p.V15    |
| SLC9A4       | 2 | 102488211 | 102488211 | Silent           | SNP | G | A    | BRC18 | NM_001011552.3  | p.T349   |
| MFSD9        | 2 | 102702069 | 102702069 | Missense         | SNP | C | A    | BRC42 | NM_032718.3     | p.A223S  |
| C2orf49      | 2 | 105328244 | 105328244 | Missense         | SNP | A | T    | BRC23 | NM_024093.1     | p.H228L  |
| LIMS1        | 2 | 108655261 | 108655261 | Missense         | SNP | A | G    | CSB34 | NM_004987.3     | p.H91R   |
| RANBP2       | 2 | 108749170 | 108749170 | Missense         | SNP | C | T    | CSB1  | NM_006267.4     | p.P1915S |
| CCDC138      | 2 | 108771758 | 108771758 | Missense         | SNP | C | T    | CSB1  | NM_144978.1     | p.S57F   |
| NPHP1        | 2 | 110284848 | 110284848 | Nonsense         | SNP | C | A    | CSB21 | NM_000272.3     | p.E116*  |
| BUB1         | 2 | 111143510 | 111143510 | Silent           | SNP | A | C    | BRC15 | NM_004336.3     | p.S186   |
| ACOXL        | 2 | 111258783 | 111258783 | Missense         | SNP | G | C    | CSB1  | NM_001105516.2  | p.E27Q   |
| TMEM87B      | 2 | 112572651 | 112572651 | Missense         | SNP | G | T    | BRC8  | NM_032824.2     | p.M427I  |
| TTL          | 2 | 112968364 | 112968364 | Missense         | SNP | G | C    | CSB1  | NM_153712.4     | p.R137T  |
| LOC100130100 | 2 | 113880455 | 113880455 | Missense         | SNP | G | C    | CSB33 | XM_001716615.1  | p.V5L    |
| SLC35F5      | 2 | 114229521 | 114229521 | Silent           | SNP | G | C    | BRC44 | NM_025181.2     | p.L37    |
| CCDC93       | 2 | 118432509 | 118432509 | Missense         | SNP | C | T    | BRC13 | NM_019044.3     | p.E303K  |
| MARCO        | 2 | 119448418 | 119448418 | Missense         | SNP | C | T    | BRC17 | NM_006770.3     | p.A167V  |
| PTPN4        | 2 | 120434936 | 120434936 | Missense         | SNP | G | C    | BRC44 | NM_002830.2     | p.Q739H  |
| CNTNAP5      | 2 | 124891639 | 124891639 | Splice_Site      | SNP | T | C    | BRC35 | NM_130773.2     | e4+2     |
| CNTNAP5      | 2 | 125238172 | 125238172 | Silent           | SNP | C | T    | CSB2  | NM_130773.2     | p.D836   |
| LOC339760    | 2 | 127374001 | 127374001 | Silent           | SNP | G | A    | BRC18 | XM_295058.1     | p.K411   |
| IWS1         | 2 | 127979042 | 127979042 | Frame Shift Ins  | INS |   | 0 AA | BRC7  | NM_017969.2     | p.E303fs |
| MYO7B        | 2 | 128055988 | 128055988 | Missense         | SNP | G | A    | BRC39 | NM_001080527.1  | p.R378Q  |
| WDR33        | 2 | 128194139 | 128194139 | Missense         | SNP | G | C    | BRC13 | NM_018383.1     | p.Q644E  |
| SAP130       | 2 | 128490583 | 128490583 | Silent           | SNP | C | T    | CSB13 | NM_024545.1     | p.P145   |

|                     |   |           |           |                    |     |   |   |         |                 |          |
|---------------------|---|-----------|-----------|--------------------|-----|---|---|---------|-----------------|----------|
| LOC653781           | 2 | 131106662 | 131106662 | Nonsense           | SNP | C | T | CSB1    | XM_929706.3     | p.Q421*  |
| LOC730032           | 2 | 131389155 | 131389155 | Missense           | SNP | C | T | BRC40   | XM_001132160.2  | p.P389L  |
| uc002tsy.2          | 2 | 131995028 | 131995028 | Missense           | SNP | A | T | BRC14   | ENST00000356430 | p.Q216L  |
| NAP5                | 2 | 133206014 | 133206014 | Missense           | SNP | G | A | CSB30   | NM_207363.2     | p.R1737C |
| NAP5                | 2 | 133257650 | 133257650 | Silent             | SNP | G | A | BRC31   | NM_207363.2     | p.I1068  |
| CCNT2               | 2 | 135410980 | 135410986 | Frame Shift<br>Del | DEL | C |   | 0 BRC39 | NM_058241.2     | p.L114fs |
| DARS                | 2 | 136396834 | 136396834 | Frame Shift<br>Del | DEL | A |   | 0 BRC15 | NM_001349.2     | p.I268fs |
| ENSG0000021608<br>1 | 2 | 137018450 | 137018450 | RNA                | SNP | G | T | BRC47   | ENST00000401262 | NULL     |
| THSD7B              | 2 | 138046567 | 138046567 | Missense           | SNP | G | C | CSB1    | NM_001080427.1  | p.E1103Q |
| LRP1B               | 2 | 141250216 | 141250216 | Silent             | SNP | G | A | BRC17   | NM_018557.2     | p.D1807  |
| LRP1B               | 2 | 141382099 | 141382099 | Missense           | SNP | C | A | BRC7    | NM_018557.2     | p.A1113S |
| LRP1B               | 2 | 141721388 | 141721388 | Missense           | SNP | C | G | BRC51   | NM_018557.2     | p.D157H  |
| ORC4L               | 2 | 148426459 | 148426459 | Nonsense           | SNP | G | A | BRC39   | NM_002552.2     | p.Q181*  |
| MBD5                | 2 | 148943342 | 148943342 | Missense           | SNP | G | C | BRC39   | NM_018328.3     | p.E454Q  |
| RIF1                | 2 | 152028956 | 152028956 | Missense           | SNP | C | T | BRC39   | NM_018151.3     | p.A1559V |
| NEB                 | 2 | 152079190 | 152079190 | Splice_Site        | SNP | T | C | BRC36   | NM_004543.3     | e130-2   |
| NEB                 | 2 | 152222800 | 152222800 | Silent             | SNP | G | A | BRC39   | NM_004543.3     | p.L2042  |
| FMNL2               | 2 | 153183775 | 153183775 | Missense           | SNP | C | A | CSB3    | NM_052905.3     | p.P495Q  |
| GALNT13             | 2 | 154807660 | 154807660 | Missense           | SNP | G | A | CSB34   | NM_052917.2     | p.D228N  |
| GALNT13             | 2 | 154810642 | 154810642 | Missense           | SNP | T | A | BRC28   | NM_052917.2     | p.M253K  |
| KCNJ3               | 2 | 155264183 | 155264183 | Missense           | SNP | A | G | CSB7    | NM_002239.2     | p.N217S  |
| ACVR1               | 2 | 158325645 | 158325645 | Silent             | SNP | C | T | CSB1    | NM_001105.4     | p.V419   |
| LY75                | 2 | 160425623 | 160425623 | Missense           | SNP | A | C | BRC48   | NM_002349.2     | p.N741K  |
| SLC4A10             | 2 | 162443929 | 162443929 | Missense           | SNP | G | A | BRC38   | NM_022058.3     | p.A301T  |
| KCNH7               | 2 | 163082528 | 163082528 | Missense           | SNP | C | T | BRC50   | NM_033272.2     | p.V284I  |
| SCN3A               | 2 | 165656007 | 165656007 | Silent             | SNP | C | G | BRC39   | NM_006922.1     | p.L1634  |
| SCN2A               | 2 | 165953677 | 165953677 | Silent             | SNP | C | T | CSB1    | NM_001040142.1  | p.I1705  |
| SCN1A               | 2 | 166560783 | 166560783 | Missense           | SNP | T | C | CSB1    | NM_006920.4     | p.I1512V |
| SCN1A               | 2 | 166567243 | 166567243 | Silent             | SNP | G | A | BRC39   | NM_006920.4     | p.L1412  |
| SCN1A               | 2 | 166567350 | 166567350 | Missense           | SNP | C | T | CSB6    | NM_006920.4     | p.E1377K |
| SCN7A               | 2 | 166981630 | 166981630 | Missense           | SNP | T | C | BRC30   | NM_002976.2     | p.R1083G |
| SCN7A               | 2 | 167042347 | 167042347 | Missense           | SNP | C | T | CSB1    | NM_002976.2     | p.E36K   |
| XIRP2               | 2 | 167818879 | 167818879 | Missense           | SNP | A | G | BRC20   | NM_001079810.2  | p.H423R  |

|          |   |           |           |                         |     |   |       |       |                 |                      |
|----------|---|-----------|-----------|-------------------------|-----|---|-------|-------|-----------------|----------------------|
| LRP2     | 2 | 169704034 | 169704034 | Missense                | SNP | A | G     | BRC23 | NM_004525.2     | p.L4454P             |
| LRP2     | 2 | 169771306 | 169771306 | Silent                  | SNP | G | A     | BRC13 | NM_004525.2     | p.L2390              |
| LRP2     | 2 | 169771369 | 169771369 | Silent                  | SNP | G | A     | CSB2  | NM_004525.2     | p.D2369              |
| LRP2     | 2 | 169774389 | 169774389 | Missense<br>Frame Shift | SNP | C | T     | BRC29 | NM_004525.2     | p.A2097T             |
| PPIG     | 2 | 170179438 | 170179438 | Ins                     | INS |   | 0 T   | BRC35 | NM_004792.2     | p.R170fs             |
| PHOSPHO2 | 2 | 170265988 | 170265988 | Missense                | SNP | G | C     | BRC11 | NM_001008489.2  | p.K87N               |
| DLX2     | 2 | 172673662 | 172673662 | Missense                | SNP | G | C     | BRC50 | NM_004405.3     | p.P281R              |
| DLX2     | 2 | 172675399 | 172675399 | Silent                  | SNP | A | C     | CSB15 | NM_004405.3     | p.G38                |
| SP3      | 2 | 174528157 | 174528157 | Silent                  | SNP | C | G     | CSB1  | NM_003111.3     | p.L443               |
| NFE2L2   | 2 | 177804156 | 177804156 | Missense                | SNP | A | C     | CSB21 | NM_006164.1     | p.I474S              |
| PDE11A   | 2 | 178253812 | 178253812 | Missense                | SNP | C | T     | BRC40 | NM_016953.1     | p.R804H              |
| TTN      | 2 | 179136954 | 179136954 | Missense                | SNP | G | A     | BRC37 | ENST00000375038 | p.A23365V            |
| TTN      | 2 | 179148663 | 179148663 | Missense                | SNP | G | C     | BRC39 | ENST00000375038 | p.S19462C            |
| TTN      | 2 | 179151115 | 179151115 | Missense                | SNP | C | G     | CSB1  | ENST00000375038 | p.K18772N            |
| TTN      | 2 | 179163706 | 179163706 | Missense                | SNP | C | G     | CSB1  | ENST00000375038 | p.R16312T            |
| TTN      | 2 | 179186199 | 179186199 | Missense                | SNP | C | T     | BRC50 | ENST00000375038 | p.E12510K            |
| TTN      | 2 | 179191373 | 179191373 | Missense                | SNP | C | T     | CSB10 | ENST00000375038 | p.G11668E            |
| TTN      | 2 | 179277122 | 179277122 | Missense                | SNP | C | T     | BRC16 | ENST00000375038 | p.E8830K             |
| TTN      | 2 | 179348472 | 179348472 | Missense                | SNP | C | T     | CSB1  | NM_133379.3     | p.D2122N<br>p.A736in |
| CCDC141  | 2 | 179410260 | 179410260 | In Frame Ins            | INS |   | 0 AGT | CSB21 | NM_173648.2     | Frame insDS          |
| CWC22    | 2 | 180546203 | 180546203 | Missense                | SNP | C | T     | BRC50 | NM_020943.2     | p.A256T              |
| CERKL    | 2 | 182121702 | 182121702 | Silent                  | SNP | G | A     | BRC50 | NM_201548.1     | p.S341               |
| NEUROD1  | 2 | 182251123 | 182251123 | Missense                | SNP | G | C     | CSB1  | NM_002500.2     | p.S237C              |
| NEUROD1  | 2 | 182251241 | 182251241 | Missense                | SNP | C | G     | BRC47 | NM_002500.2     | p.E198Q              |
| ZNF804A  | 2 | 185509680 | 185509680 | Missense                | SNP | C | G     | BRC18 | NM_194250.1     | p.Q438E              |
| FLJ44048 | 2 | 186378962 | 186378962 | Missense                | SNP | A | T     | BRC51 | NM_207482.2     | p.N260Y              |
| COL3A1   | 2 | 189567040 | 189567040 | Missense                | SNP | G | C     | BRC4  | NM_000090.3     | p.G394A              |
| COL3A1   | 2 | 189580517 | 189580517 | Missense                | SNP | G | C     | BRC5  | NM_000090.3     | p.G1101A             |
| MSTN     | 2 | 190630276 | 190630276 | Missense                | SNP | A | G     | CSB15 | NM_005259.2     | p.Y361H              |
| STAT4    | 2 | 191719705 | 191719705 | Missense                | SNP | G | C     | BRC31 | NM_003151.2     | p.T51S               |
| DNAH7    | 2 | 196459207 | 196459207 | Missense                | SNP | C | A     | BRC38 | NM_018897.2     | p.R1814L             |
| HECW2    | 2 | 196902591 | 196902591 | Missense                | SNP | G | A     | BRC9  | NM_020760.1     | p.A175V              |
| HECW2    | 2 | 197006281 | 197006281 | Missense                | SNP | G | A     | CSB22 | NM_020760.1     | p.P38S               |
| SF3B1    | 2 | 197975079 | 197975079 | Missense                | SNP | T | C     | CSB13 | NM_012433.1     | p.K700E              |

|                     |   |           |           |                         |     |   |   |        |                 |          |
|---------------------|---|-----------|-----------|-------------------------|-----|---|---|--------|-----------------|----------|
| SF3B1               | 2 | 197975079 | 197975079 | Missense                | SNP | T | C | CSB21  | NM_012433.1     | p.K700E  |
| SF3B1               | 2 | 197975606 | 197975606 | Missense                | SNP | T | G | BRC32  | NM_012433.1     | p.K666Q  |
| HSPD1               | 2 | 198071643 | 198071643 | Splice_Site             | SNP | C | T | BRC26  | NM_002156.4     | e1+1     |
| SGOL2               | 2 | 201109047 | 201109047 | Silent                  | SNP | A | T | BRC51  | NM_152524.4     | p.I108   |
| SGOL2               | 2 | 201145298 | 201145298 | Missense                | SNP | G | A | BRC31  | NM_152524.4     | p.E662K  |
| AOX1                | 2 | 201215769 | 201215769 | Silent                  | SNP | G | A | BRC20  | NM_001159.3     | p.K949   |
| ALS2CR11            | 2 | 202174757 | 202174757 | Missense                | SNP | C | T | BRC39  | NM_152525.4     | p.E156K  |
| FZD7                | 2 | 202608568 | 202608568 | Missense                | SNP | G | A | CSB1   | NM_003507.1     | p.R318H  |
| ZDBF2               | 2 | 206881620 | 206881620 | Missense                | SNP | C | G | CSB1   | NM_020923.1     | p.Q1375E |
| DYTN                | 2 | 207236055 | 207236055 | Missense                | SNP | G | C | BRC39  | NM_001093730.1  | p.Q484E  |
| FZD5                | 2 | 208340734 | 208340734 | Silent                  | SNP | G | A | CSB1   | NM_003468.3     | p.F325   |
| PIP5K3              | 2 | 208898413 | 208898413 | Missense                | SNP | C | T | CSB14  | NM_015040.3     | p.A878V  |
| uc002vdl.1          | 2 | 210549219 | 210549219 | Missense                | SNP | G | A | BRC34  | ENST00000333907 | p.V307M  |
| ACADL               | 2 | 210791061 | 210791061 | Missense                | SNP | C | T | BRC11  | NM_001608.3     | p.A82T   |
| BARD1               | 2 | 215318760 | 215318760 | Missense                | SNP | G | T | BRC20  | NM_000465.2     | p.Q581K  |
| ENSG0000021205<br>5 | 2 | 216451862 | 216451862 | RNA                     | SNP | G | A | BRC31  | ENST00000390766 | NULL     |
| VIL1                | 2 | 219004846 | 219004846 | Silent                  | SNP | C | T | CSB19  | NM_007127.2     | p.F375   |
| CYP27A1             | 2 | 219385261 | 219385261 | Silent                  | SNP | C | G | CSB1   | NM_000784.3     | p.L173   |
| NHEJ1               | 2 | 219730485 | 219730485 | Missense                | SNP | G | T | CSB3   | NM_024782.2     | p.L1151  |
| ABCB6               | 2 | 219783252 | 219783252 | Silent                  | SNP | C | A | CSB19  | NM_005689.1     | p.V788   |
| DES                 | 2 | 219996744 | 219996744 | Missense                | SNP | A | G | CSB16  | NM_001927.3     | p.I416V  |
| CHPF                | 2 | 220112745 | 220112745 | Missense                | SNP | G | T | BRC36  | NM_024536.5     | p.F644L  |
| STK11IP             | 2 | 220184992 | 220184992 | Missense                | SNP | G | A | BRC44  | ENST00000295641 | p.D803N  |
| PAX3                | 2 | 222794281 | 222794281 | Missense                | SNP | G | A | BRC13  | NM_181459.4     | p.H288Y  |
| SGPP2               | 2 | 223131563 | 223131563 | Missense                | SNP | C | T | BRC41  | NM_152386.2     | p.S301F  |
| COL4A4              | 2 | 227632523 | 227632523 | Missense                | SNP | C | T | BRC41  | NM_000092.4     | p.G742E  |
| PID1                | 2 | 229835723 | 229835723 | Missense                | SNP | T | A | CSB22  | NM_017933.1     | p.R15W   |
| DNER                | 2 | 230164756 | 230164756 | Nonsense<br>Frame Shift | SNP | G | T | CSB13  | NM_139072.3     | p.C123*  |
| TRIP12              | 2 | 230432024 | 230432024 | Del                     | DEL | G |   | 0 CSB7 | NM_004238.1     | p.S204fs |
| SP110               | 2 | 230785824 | 230785824 | Missense                | SNP | C | T | CSB1   | NM_080424.3     | p.G160E  |
| SP140               | 2 | 230884533 | 230884533 | Missense                | SNP | G | C | CSB1   | NM_007237.2     | p.Q828H  |
| SP140L              | 2 | 230974367 | 230974367 | Missense                | SNP | A | T | CSB29  | NM_138402.4     | p.S489C  |
| ITM2C               | 2 | 231448739 | 231448739 | Missense                | SNP | C | A | BRC41  | NM_030926.1     | p.P141H  |
| PSMD1               | 2 | 231648517 | 231648517 | Missense                | SNP | G | C | BRC39  | NM_002807.2     | p.K310N  |

|              |   |           |           |                    |     |   |   |       |                 |          |
|--------------|---|-----------|-----------|--------------------|-----|---|---|-------|-----------------|----------|
| ARMC9        | 2 | 231835287 | 231835287 | Missense           | SNP | G | C | CSB1  | NM_025139.3     | p.E351Q  |
| NCL          | 2 | 232036229 | 232036229 | Missense           | SNP | G | A | CSB1  | NM_005381.2     | p.P21S   |
| DIS3L2       | 2 | 232873062 | 232873062 | Silent             | SNP | C | T | BRC33 | NM_152383.4     | p.R576   |
| LOC100131009 | 2 | 233017737 | 233017737 | Missense           | SNP | T | A | BRC41 | XM_001718359.1  | p.D15V   |
| COL6A3       | 2 | 237914288 | 237914288 | Silent             | SNP | C | T | BRC49 | NM_004369.3     | p.A2670  |
| COL6A3       | 2 | 237940159 | 237940159 | Missense           | SNP | C | T | BRC3  | NM_004369.3     | p.E1804K |
| COL6A3       | 2 | 237952567 | 237952567 | Missense           | SNP | C | T | CSB7  | NM_004369.3     | p.V650I  |
| LRRFIP1      | 2 | 238336786 | 238336786 | Nonsense           | SNP | C | G | BRC51 | NM_004735.1     | p.S540*  |
| PER2         | 2 | 238835669 | 238835669 | Missense           | SNP | C | T | CSB1  | ENST00000254658 | p.E368K  |
| FLJ43879     | 2 | 239512258 | 239512258 | RNA                | SNP | G | A | BRC50 | XR_041560.1     | NULL     |
| uc002vym.1   | 2 | 240169670 | 240169670 | Missense           | SNP | A | G | BRC4  | ENST00000358775 | p.S174G  |
| GPR35        | 2 | 241218733 | 241218733 | Silent             | SNP | C | T | CSB1  | NM_005301.2     | p.L231   |
| KIF1A        | 2 | 241325197 | 241325197 | Silent             | SNP | G | A | CSB1  | NM_004321.4     | p.L1220  |
| SNED1        | 2 | 241675520 | 241675520 | Nonsense           | SNP | A | T | BRC28 | NM_001080437.1  | p.K1388* |
| HDLBP        | 2 | 241827854 | 241827854 | Missense           | SNP | C | T | BRC14 | NM_005336.3     | p.V816I  |
| HDLBP        | 2 | 241836399 | 241836399 | Missense           | SNP | C | G | CSB1  | NM_005336.3     | p.R517T  |
| LRRN1        | 3 | 3862773   | 3862773   | Missense           | SNP | C | A | CSB23 | NM_020873.5     | p.T483N  |
| BHLHE40      | 3 | 5000350   | 5000350   | Silent             | SNP | C | T | CSB23 | NM_003670.2     | p.P404   |
| EDEM1        | 3 | 5204526   | 5204526   | Silent             | SNP | C | T | BRC33 | NM_014674.2     | p.L12    |
| THUMPD3      | 3 | 9400954   | 9400954   | Missense           | SNP | C | A | CSB12 | NM_015453.1     | p.R432S  |
| SETD5        | 3 | 9490137   | 9490137   | Missense           | SNP | C | T | CSB31 | NM_001080517.1  | p.S1138F |
| IL17RC       | 3 | 9940679   | 9940679   | Missense           | SNP | C | G | BRC30 | NM_153461.4     | p.P317R  |
| LOC100129929 | 3 | 11901972  | 11901972  | Silent             | SNP | C | G | BRC18 | XM_001716291.1  | p.L374   |
| SYN2         | 3 | 12157170  | 12157170  | Frame Shift<br>Del | DEL | A |   | CSB14 | ENST00000341648 | p.V66fs  |
| PPARG        | 3 | 12422406  | 12422406  | Silent             | SNP | G | A | BRC29 | NM_015869.5     | p.Q215   |
| RAF1         | 3 | 12601636  | 12601636  | Silent             | SNP | G | A | BRC41 | NM_002880.3     | p.I551   |
| NUP210       | 3 | 13345319  | 13345319  | Missense           | SNP | C | T | CSB1  | NM_024923.2     | p.G1413E |
| NUP210       | 3 | 13359727  | 13359727  | Missense           | SNP | G | C | BRC14 | NM_024923.2     | p.A971G  |
| NUP210       | 3 | 13392828  | 13392828  | Missense           | SNP | G | A | CSB28 | NM_024923.2     | p.T419M  |
| CHCHD4       | 3 | 14133020  | 14133020  | Missense           | SNP | C | T | CSB15 | NM_144636.1     | p.D23N   |
| XPC          | 3 | 14181947  | 14181947  | Missense           | SNP | G | A | CSB26 | ENST00000285021 | p.S255L  |
| GRIP2        | 3 | 14523351  | 14523351  | Missense           | SNP | C | G | CSB1  | NM_001080423.1  | p.W885S  |
| LOC344875    | 3 | 15181697  | 15181697  | Missense           | SNP | A | G | BRC30 | XM_497913.1     | p.S925P  |
| CAPN7        | 3 | 15240062  | 15240062  | Missense           | SNP | A | G | BRC31 | NM_014296.2     | p.M239V  |



|          |   |          |          |                    |     |               |   |   |       |                |                         |
|----------|---|----------|----------|--------------------|-----|---------------|---|---|-------|----------------|-------------------------|
| METTL6   | 3 | 15432435 | 15432439 | Frame Shift<br>Del | DEL | TATCA         |   | 0 | BRC41 | NM_152396.2    | p.D126fs                |
| COLQ     | 3 | 15538086 | 15538086 | Silent             | SNP | G             | A |   | BRC50 | NM_005677.3    | p.F17                   |
| SATB1    | 3 | 18365903 | 18365903 | Silent             | SNP | G             | A |   | CSB12 | NM_002971.1    | p.P685                  |
| SATB1    | 3 | 18437347 | 18437347 | Silent             | SNP | C             | G |   | CSB20 | NM_002971.1    | p.P39                   |
| EFHB     | 3 | 19901034 | 19901034 | Missense           | SNP | C             | A |   | BRC16 | NM_144715.3    | p.D671Y                 |
| EFHB     | 3 | 19950292 | 19950292 | Missense           | SNP | C             | T |   | CSB27 | NM_144715.3    | p.E75K                  |
| KAT2B    | 3 | 20117790 | 20117790 | Missense           | SNP | A             | T |   | CSB25 | NM_003884.4    | p.N226I                 |
| SGOL1    | 3 | 20200523 | 20200523 | Missense           | SNP | T             | A |   | BRC17 | NM_001012410.1 | p.M1L                   |
| UBE2E1   | 3 | 23905618 | 23905618 | Silent             | SNP | G             | A |   | BRC18 | NM_003341.3    | p.R116                  |
| OXSM     | 3 | 25808017 | 25808017 | Nonsense           | SNP | C             | T |   | CSB1  | NM_017897.1    | p.Q168*                 |
| TRIM71   | 3 | 32834598 | 32834598 | Missense           | SNP | G             | A |   | CSB10 | NM_001039111.1 | p.D8N                   |
| ARPP-21  | 3 | 35810402 | 35810402 | Missense           | SNP | G             | A |   | BRC38 | NM_016300.1    | p.C796Y                 |
| DCLK3    | 3 | 36754022 | 36754022 | Missense           | SNP | G             | A |   | BRC49 | NM_033403.1    | p.T378I                 |
| DCLK3    | 3 | 36754254 | 36754254 | Missense           | SNP | T             | C |   | BRC18 | NM_033403.1    | p.K301E                 |
| LBA1     | 3 | 36849061 | 36849061 | Silent             | SNP | G             | C |   | BRC48 | NM_014831.1    | p.L1745                 |
| ITGA9    | 3 | 37700429 | 37700429 | Silent             | SNP | C             | A |   | CSB22 | NM_002207.2    | p.S662                  |
| OXSRI    | 3 | 38207250 | 38207250 | Missense           | SNP | T             | C |   | BRC24 | NM_005109.2    | p.C70R                  |
| SLC22A14 | 3 | 38322621 | 38322621 | Silent             | SNP | C             | T |   | BRC50 | NM_004803.3    | p.L34                   |
| SCN5A    | 3 | 38582993 | 38582993 | Missense           | SNP | C             | T |   | CSB22 | NM_001099404.4 | p.V1251M                |
| SCN10A   | 3 | 38730576 | 38730576 | Splice_Site        | SNP | C             | G |   | BRC50 | NM_006514.2    | e21-1                   |
| SCN10A   | 3 | 38773518 | 38773518 | Missense           | SNP | G             | T |   | CSB19 | NM_006514.2    | p.Q363K                 |
| SCN11A   | 3 | 38911069 | 38911069 | Missense           | SNP | C             | G |   | BRC39 | NM_014139.2    | p.D932H                 |
| WDR48    | 3 | 39096304 | 39096304 | Splice_Site        | INS |               | T | 0 | CSB19 | NM_020839.2    | e11+1                   |
| ULK4     | 3 | 41914930 | 41914930 | Missense           | SNP | G             | A |   | CSB1  | NM_017886.2    | p.S449L                 |
| ULK4     | 3 | 41952357 | 41952365 | In Frame Del       | DEL | AATCAG<br>GTC |   | 0 | BRC41 | NM_017886.2    | p.DLI104in<br>Frame del |
| TRAK1    | 3 | 42208092 | 42208092 | Silent             | SNP | G             | A |   | BRC8  | NM_001042646.1 | p.E243                  |
| CYP8B1   | 3 | 42891053 | 42891053 | Missense           | SNP | G             | T |   | BRC41 | NM_004391.2    | p.F420L                 |
| TGM4     | 3 | 44904184 | 44904184 | Splice_Site        | SNP | G             | A |   | BRC30 | NM_003241.3    | e3-1                    |
| TGM4     | 3 | 44907221 | 44907221 | Nonsense           | SNP | G             | A |   | BRC44 | NM_003241.3    | p.W141*                 |
| NBEAL2   | 3 | 47011567 | 47011567 | Missense           | SNP | C             | G |   | BRC11 | NM_015175.1    | p.I446M                 |
| SMARCC1  | 3 | 47727250 | 47727253 | Frame Shift<br>Del | DEL | TCAT          |   | 0 | BRC29 | NM_003074.3    | p.N281fs                |
| MAP4     | 3 | 47932951 | 47932951 | Missense           | SNP | T             | G |   | BRC32 | NM_002375.1    | p.N457T                 |
| COL7A1   | 3 | 48585116 | 48585116 | Missense           | SNP | G             | T |   | CSB2  | NM_000094.3    | p.P2298T                |



|          |   |           |           |                  |     |    |     |         |                 |          |
|----------|---|-----------|-----------|------------------|-----|----|-----|---------|-----------------|----------|
| CELSR3   | 3 | 48658072  | 48658072  | Silent           | SNP | G  | A   | CSB15   | NM_001407.2     | p.D2535  |
| CELSR3   | 3 | 48684968  | 48684968  | Missense         | SNP | C  | G   | BRC11   | ENST00000383733 | p.K6N    |
| WDR6     | 3 | 49026671  | 49026671  | Silent           | SNP | A  | G   | BRC41   | NM_018031.3     | p.E869   |
| CCDC71   | 3 | 49175841  | 49175841  | Nonsense         | SNP | G  | A   | CSB33   | NM_022903.3     | p.R269*  |
| AMIGO3   | 3 | 49730699  | 49730699  | Silent           | SNP | G  | A   | BRC5    | NM_198722.2     | p.L402   |
| HYAL2    | 3 | 50330824  | 50330824  | Missense         | SNP | G  | T   | CSB12   | NM_003773.3     | p.H388N  |
| MAPKAPK3 | 3 | 50659592  | 50659592  | Missense         | SNP | C  | T   | CSB6    | NM_004635.3     | p.T317M  |
| IQCF1    | 3 | 51912103  | 51912103  | Missense         | SNP | C  | A   | CSB6    | NM_152397.1     | p.D16Y   |
| BAP1     | 3 | 52415946  | 52415946  | Missense         | SNP | C  | T   | BRC13   | NM_004656.2     | p.E200K  |
| PBRM1    | 3 | 52573122  | 52573122  | Missense         | SNP | C  | T   | CSB1    | NM_018165.4     | p.E1255K |
| ITIH1    | 3 | 52794214  | 52794214  | Missense         | SNP | G  | A   | BRC18   | NM_002215.2     | p.E508K  |
| DCP1A    | 3 | 53313338  | 53313339  | Del              | DEL | AT |     | 0 BRC51 | NM_018403.4     | p.I178fs |
| CACNA1D  | 3 | 53819103  | 53819103  | Nonsense         | SNP | C  | A   | BRC18   | NM_000720.2     | p.S1997* |
| WNT5A    | 3 | 55488394  | 55488394  | Missense         | SNP | C  | A   | BRC24   | NM_003392.3     | p.V127L  |
| ERC2     | 3 | 56305476  | 56305476  | Nonsense         | SNP | G  | A   | BRC39   | NM_015576.1     | p.Q229*  |
| C3orf63  | 3 | 56655883  | 56655883  | Missense         | SNP | T  | C   | BRC31   | NM_015224.1     | p.Q245R  |
| DNAH12L  | 3 | 57469968  | 57469968  | Missense         | SNP | G  | C   | CSB1    | ENST00000311202 | p.L161V  |
| FAM116A  | 3 | 57624473  | 57624473  | Missense         | SNP | G  | A   | BRC41   | NM_152678.2     | p.A148V  |
| KCTD6    | 3 | 58462296  | 58462296  | Missense         | SNP | C  | T   | CSB20   | NM_153331.1     | p.T204M  |
| PRICKLE2 | 3 | 64059960  | 64059960  | Missense         | SNP | G  | A   | CSB1    | NM_198859.3     | p.S781F  |
| ADAMTS9  | 3 | 64522382  | 64522382  | Missense         | SNP | C  | T   | BRC21   | NM_182920.1     | p.C1537Y |
| KBTBD8   | 3 | 67132162  | 67132162  | Missense         | SNP | C  | A   | BRC29   | NM_032505.1     | p.D2E    |
| FAM19A4  | 3 | 68864988  | 68864988  | Missense         | SNP | G  | A   | BRC8    | NM_001005527.1  | p.R140W  |
| CNTN3    | 3 | 74493859  | 74493859  | Missense         | SNP | C  | G   | CSB1    | NM_020872.1     | p.K412N  |
| GBE1     | 3 | 81781662  | 81781662  | Missense         | SNP | T  | G   | CSB34   | NM_000158.3     | p.H177P  |
| CADM2    | 3 | 85934032  | 85934032  | Ins              | INS |    | 0 A | BRC15   | NM_153184.2     | p.A72fs  |
| VGLL3    | 3 | 87094883  | 87094883  | Nonstop Mutation | SNP | C  | A   | BRC5    | ENST00000383698 | p.*321L  |
| PROS1    | 3 | 95107425  | 95107425  | Missense         | SNP | G  | A   | BRC39   | NM_000313.3     | p.S165L  |
| DHFRL1   | 3 | 95262629  | 95262629  | Silent           | SNP | G  | A   | BRC18   | NM_176815.3     | p.I139   |
| OR5H14   | 3 | 99351346  | 99351346  | Missense         | SNP | C  | T   | CSB23   | NM_001005514.1  | p.R143W  |
| OR5H2    | 3 | 99485015  | 99485015  | Silent           | SNP | T  | C   | BRC39   | NM_001005482.1  | p.S198   |
| TBC1D23  | 3 | 101525150 | 101525150 | Missense         | SNP | C  | G   | BRC20   | NM_018309.2     | p.T668S  |
| TOMM70A  | 3 | 101588474 | 101588474 | Silent           | SNP | G  | A   | CSB2    | NM_014820.3     | p.G121   |

|          |   |           |           |                         |     |   |     |       |                |          |
|----------|---|-----------|-----------|-------------------------|-----|---|-----|-------|----------------|----------|
| SENP7    | 3 | 102533590 | 102533590 | Missense                | SNP | T | C   | BRC8  | NM_020654.1    | p.Y876C  |
| SENP7    | 3 | 102568045 | 102568045 | Missense                | SNP | C | T   | BRC39 | NM_020654.1    | p.E413K  |
| CEP97    | 3 | 102958616 | 102958616 | Missense                | SNP | A | G   | BRC4  | NM_024548.2    | p.M305V  |
| FAM55C   | 3 | 103002781 | 103002781 | Missense<br>Frame Shift | SNP | G | A   | CSB1  | NM_145037.1    | p.E36K   |
| NFKBIZ   | 3 | 103054957 | 103054957 | Ins                     | INS |   | 0 C | CSB25 | NM_031419.1    | p.H300fs |
| MYH15    | 3 | 109646293 | 109646293 | Missense                | SNP | C | T   | BRC39 | NM_014981.1    | p.E867K  |
| MORC1    | 3 | 110186308 | 110186308 | Silent                  | SNP | G | A   | CSB25 | NM_014429.3    | p.L757   |
| PVRL3    | 3 | 112335564 | 112335564 | Nonsense                | SNP | G | T   | CSB13 | NM_015480.1    | p.E488*  |
| PHLDB2   | 3 | 113120618 | 113120618 | Missense                | SNP | G | T   | CSB15 | NM_145753.1    | p.G577C  |
| PHLDB2   | 3 | 113141027 | 113141027 | Missense                | SNP | G | C   | BRC51 | NM_145753.1    | p.D673H  |
| SLC35A5  | 3 | 113782416 | 113782416 | Silent                  | SNP | G | T   | BRC31 | NM_017945.2    | p.L254   |
| WDR52    | 3 | 114580871 | 114580871 | Missense                | SNP | G | A   | CSB1  | NM_018338.2    | p.S757L  |
| WDR52    | 3 | 114598181 | 114598181 | Silent                  | SNP | G | T   | BRC39 | NM_018338.2    | p.L551   |
| CCDC52   | 3 | 114655004 | 114655004 | Missense                | SNP | G | T   | BRC11 | NM_144718.3    | p.S714Y  |
| SIDT1    | 3 | 114794565 | 114794565 | Missense                | SNP | G | A   | CSB1  | NM_017699.2    | p.G342E  |
| KIAA2018 | 3 | 114859403 | 114859403 | Silent                  | SNP | C | A   | CSB10 | NM_001009899.2 | p.T1272  |
| ZDHHC23  | 3 | 115157907 | 115157907 | Missense                | SNP | C | G   | BRC39 | NM_173570.3    | p.Q302E  |
| ZNF80    | 3 | 115438024 | 115438024 | Missense                | SNP | C | A   | BRC51 | NM_007136.2    | p.K196N  |
| B4GALT4  | 3 | 120425671 | 120425671 | Missense                | SNP | C | T   | CSB22 | NM_003778.3    | p.E200K  |
| PLA1A    | 3 | 120799511 | 120799511 | Missense                | SNP | G | A   | BRC37 | NM_015900.2    | p.V21I   |
| POPDC2   | 3 | 120856107 | 120856107 | Missense                | SNP | G | C   | BRC39 | NM_022135.2    | p.P179A  |
| C3orf15  | 3 | 120908354 | 120908354 | Missense                | SNP | T | C   | BRC29 | NM_033364.3    | p.F45L   |
| RABL3    | 3 | 121911411 | 121911411 | Silent                  | SNP | C | T   | BRC50 | NM_173825.3    | p.K58    |
| STXBP5L  | 3 | 122609089 | 122609089 | Missense                | SNP | G | C   | CSB22 | NM_014980.2    | p.S990T  |
| STXBP5L  | 3 | 122614807 | 122614807 | Missense                | SNP | C | G   | BRC31 | NM_014980.2    | p.P1045A |
| POLQ     | 3 | 122731297 | 122731297 | Silent                  | SNP | A | G   | BRC32 | NM_199420.3    | p.Y331   |
| GOLGB1   | 3 | 122898170 | 122898170 | Missense                | SNP | G | C   | CSB8  | NM_004487.3    | p.S1292C |
| SLC15A2  | 3 | 123133255 | 123133255 | Missense                | SNP | C | A   | CSB1  | NM_021082.2    | p.L582M  |
| CASR     | 3 | 123463231 | 123463231 | Missense                | SNP | G | A   | BRC20 | NM_000388.3    | p.R220Q  |
| CASR     | 3 | 123477394 | 123477394 | Missense                | SNP | G | A   | BRC50 | NM_000388.3    | p.E475K  |
| CASR     | 3 | 123486099 | 123486099 | Missense                | SNP | G | A   | BRC51 | NM_000388.3    | p.E870K  |
| PARP14   | 3 | 123920080 | 123920080 | Silent                  | SNP | C | T   | CSB1  | NM_017554.2    | p.I1464  |
| MYLK     | 3 | 124953937 | 124953937 | Missense                | SNP | C | T   | CSB33 | NM_053025.3    | p.G102R  |
| KALRN    | 3 | 125429588 | 125429588 | Silent                  | SNP | G | A   | BRC41 | NM_001024660.2 | p.V43    |

|                     |   |           |           |          |     |   |   |       |                 |          |
|---------------------|---|-----------|-----------|----------|-----|---|---|-------|-----------------|----------|
| KALRN               | 3 | 125835457 | 125835457 | Missense | SNP | G | T | CSB22 | NM_001024660.2  | p.K1844N |
| HEG1                | 3 | 126230761 | 126230761 | Missense | SNP | G | T | CSB6  | NM_020733.1     | p.A193E  |
| SLC12A8             | 3 | 126388841 | 126388841 | Missense | SNP | T | G | CSB22 | NM_024628.5     | p.Y107S  |
| OSBPL11             | 3 | 126761999 | 126761999 | Missense | SNP | C | G | BRC5  | NM_022776.4     | p.E357Q  |
| SLC41A3             | 3 | 127218314 | 127218314 | Silent   | SNP | C | T | BRC13 | NM_001008485.1  | p.K280   |
| TR2IT1              | 3 | 127773844 | 127773844 | Missense | SNP | C | T | BRC11 | NM_001039783.1  | p.R78K   |
| IFT122              | 3 | 130716021 | 130716021 | Silent   | SNP | C | G | BRC7  | NM_052985.2     | p.A1080  |
| COL6A6              | 3 | 131795839 | 131795839 | Missense | SNP | C | G | CSB1  | NM_001102608.1  | p.P1499A |
| ENSG0000022278<br>3 | 3 | 132013453 | 132013453 | RNA      | SNP | C | G | BRC41 | ENST00000410851 | NULL     |
| NPHP3               | 3 | 133890184 | 133890184 | Missense | SNP | T | G | BRC44 | NM_153240.3     | p.K1042T |
| C3orf36             | 3 | 135130121 | 135130121 | Missense | SNP | C | G | BRC39 | NM_025041.2     | p.E73Q   |
| C3orf36             | 3 | 135130328 | 135130328 | Missense | SNP | C | T | BRC39 | NM_025041.2     | p.E4K    |
| SLCO2A1             | 3 | 135150466 | 135150466 | Nonsense | SNP | C | A | BRC39 | NM_005630.2     | p.E301*  |
| EPHB1               | 3 | 136394135 | 136394135 | Missense | SNP | G | A | BRC47 | NM_004441.3     | p.R637H  |
| STAG1               | 3 | 137542985 | 137542985 | Missense | SNP | A | T | CSB9  | NM_005862.2     | p.V1182E |
| STAG1               | 3 | 137675131 | 137675131 | Missense | SNP | C | G | BRC39 | NM_005862.2     | p.Q355H  |
| IL20RB              | 3 | 138183753 | 138183753 | Missense | SNP | G | A | BRC51 | NM_144717.2     | p.E93K   |
| COPB2               | 3 | 140576117 | 140576117 | Missense | SNP | T | C | BRC5  | NM_004766.2     | p.K219E  |
| GK5                 | 3 | 143415113 | 143415113 | Missense | SNP | G | C | BRC18 | NM_001039547.1  | p.Q88E   |
| XRN1                | 3 | 143572091 | 143572091 | Missense | SNP | G | A | CSB9  | NM_019001.1     | p.R1044C |
| ATR                 | 3 | 143659257 | 143659257 | Missense | SNP | G | T | BRC39 | NM_001184.3     | p.P2512T |
| ATR                 | 3 | 143659266 | 143659266 | Missense | SNP | C | G | BRC39 | NM_001184.3     | p.E2509Q |
| ATR                 | 3 | 143659284 | 143659284 | Missense | SNP | C | G | BRC47 | NM_001184.3     | p.E2503Q |
| ATR                 | 3 | 143659286 | 143659286 | Missense | SNP | C | A | BRC16 | NM_001184.3     | p.G2502V |
| ATR                 | 3 | 143670941 | 143670941 | Missense | SNP | C | G | BRC42 | NM_001184.3     | p.L2160F |
| ATR                 | 3 | 143760825 | 143760825 | Missense | SNP | C | G | CSB1  | NM_001184.3     | p.D564H  |
| SR140               | 3 | 144238735 | 144238735 | Missense | SNP | G | T | BRC41 | NM_001080415.1  | p.A697S  |
| CHST2               | 3 | 144323516 | 144323516 | Missense | SNP | C | A | CSB22 | NM_004267.3     | p.H390N  |
| SLC9A9              | 3 | 144696874 | 144696874 | Missense | SNP | C | G | CSB21 | NM_173653.2     | p.G399A  |
| SLC9A9              | 3 | 144780207 | 144780207 | Silent   | SNP | G | A | BRC9  | NM_173653.2     | p.A268   |
| CP                  | 3 | 150407868 | 150407868 | Silent   | SNP | G | C | BRC39 | NM_000096.3     | p.L336   |
| TM4SF18             | 3 | 150525394 | 150525394 | Missense | SNP | C | A | BRC39 | NM_138786.2     | p.D125Y  |
| EIF2A               | 3 | 151772972 | 151772972 | Missense | SNP | C | T | BRC52 | NM_032025.3     | p.A450V  |
| P2RY14              | 3 | 152414773 | 152414773 | Missense | SNP | G | C | CSB16 | NM_001081455.1  | p.Q8E    |

|         |   |           |           |              |     |               |   |         |                |                         |
|---------|---|-----------|-----------|--------------|-----|---------------|---|---------|----------------|-------------------------|
| MED12L  | 3 | 152595218 | 152595218 | Missense     | SNP | G             | A | CSB22   | NM_053002.3    | p.G1863D                |
| IGSF10  | 3 | 152647942 | 152647942 | Silent       | SNP | G             | A | BRC51   | NM_178822.3    | p.G839                  |
| IGSF10  | 3 | 152648685 | 152648685 | Missense     | SNP | C             | G | CSB1    | NM_178822.3    | p.D592H                 |
| IGSF10  | 3 | 152649485 | 152649485 | Missense     | SNP | C             | G | BRC44   | NM_178822.3    | p.G325A                 |
| AADACL2 | 3 | 152957890 | 152957890 | Missense     | SNP | C             | G | BRC39   | NM_207365.3    | p.L320V                 |
| AADAC   | 3 | 153028618 | 153028618 | Nonsense     | SNP | C             | T | BRC39   | NM_001086.2    | p.Q390*                 |
| SCHIP1  | 3 | 161088383 | 161088383 | Missense     | SNP | G             | A | BRC31   | NM_014575.2    | p.D397N                 |
| SMC4    | 3 | 161613976 | 161613976 | Missense     | SNP | T             | G | CSB1    | NM_001002800.1 | p.I334M                 |
| SLITRK3 | 3 | 166388502 | 166388502 | Silent       | SNP | G             | A | BRC11   | NM_014926.2    | p.F937                  |
| SLITRK3 | 3 | 166390981 | 166390981 | Missense     | SNP | T             | C | BRC20   | NM_014926.2    | p.N111S                 |
| SLITRK3 | 3 | 166391129 | 166391129 | Missense     | SNP | C             | G | CSB1    | NM_014926.2    | p.D62H                  |
| ZBBX    | 3 | 168560400 | 168560400 | Silent       | SNP | C             | T | BRC44   | NM_024687.2    | p.K128                  |
| GOLIM4  | 3 | 169225514 | 169225514 | Missense     | SNP | C             | T | BRC39   | NM_014498.3    | p.E563K                 |
| PHC3    | 3 | 171297724 | 171297724 | Silent       | SNP | C             | T | BRC39   | NM_024947.3    | p.L992                  |
| ZMAT3   | 3 | 180268004 | 180268004 | Silent       | SNP | G             | A | BRC50   | NM_022470.2    | p.V77                   |
| PIK3CA  | 3 | 180399618 | 180399618 | Missense     | SNP | C             | G | BRC39   | NM_006218.2    | p.P104R                 |
| PIK3CA  | 3 | 180399618 | 180399618 | Missense     | SNP | C             | T | CSB1    | NM_006218.2    | p.P104L                 |
| PIK3CA  | 3 | 180399623 | 180399631 | In Frame Del | DEL | GGCAAC<br>CGT |   | 0 CSB19 | NM_006218.2    | p.GNR106in<br>Frame del |
| PIK3CA  | 3 | 180400172 | 180400172 | Missense     | SNP | G             | A | BRC9    | NM_006218.2    | p.G118D                 |
| PIK3CA  | 3 | 180404247 | 180404247 | Missense     | SNP | T             | A | BRC52   | NM_006218.2    | p.N345K                 |
| PIK3CA  | 3 | 180404247 | 180404247 | Missense     | SNP | T             | A | CSB26   | NM_006218.2    | p.N345K                 |
| PIK3CA  | 3 | 180410674 | 180410674 | Missense     | SNP | T             | C | CSB15   | NM_006218.2    | p.C420R                 |
| PIK3CA  | 3 | 180410761 | 180410761 | Missense     | SNP | C             | A | BRC36   | NM_006218.2    | p.P449T                 |
| PIK3CA  | 3 | 180410773 | 180410773 | Missense     | SNP | G             | A | BRC13   | NM_006218.2    | p.E453K                 |
| PIK3CA  | 3 | 180418776 | 180418776 | Missense     | SNP | G             | A | BRC5    | NM_006218.2    | p.E542K                 |
| PIK3CA  | 3 | 180418776 | 180418776 | Missense     | SNP | G             | A | BRC47   | NM_006218.2    | p.E542K                 |
| PIK3CA  | 3 | 180418777 | 180418777 | Missense     | SNP | A             | T | CSB3    | NM_006218.2    | p.E542V                 |
| PIK3CA  | 3 | 180418785 | 180418785 | Missense     | SNP | G             | A | BRC3    | NM_006218.2    | p.E545K                 |
| PIK3CA  | 3 | 180418785 | 180418785 | Missense     | SNP | G             | A | BRC4    | NM_006218.2    | p.E545K                 |
| PIK3CA  | 3 | 180418785 | 180418785 | Missense     | SNP | G             | A | BRC7    | NM_006218.2    | p.E545K                 |
| PIK3CA  | 3 | 180418785 | 180418785 | Missense     | SNP | G             | A | BRC28   | NM_006218.2    | p.E545K                 |
| PIK3CA  | 3 | 180418785 | 180418785 | Missense     | SNP | G             | A | BRC33   | NM_006218.2    | p.E545K                 |
| PIK3CA  | 3 | 180418788 | 180418788 | Missense     | SNP | C             | G | CSB6    | NM_006218.2    | p.Q546E                 |
| PIK3CA  | 3 | 180421628 | 180421628 | Missense     | SNP | G             | A | BRC5    | NM_006218.2    | p.E726K                 |

|        |   |           |           |          |     |   |   |       |             |          |
|--------|---|-----------|-----------|----------|-----|---|---|-------|-------------|----------|
| PIK3CA | 3 | 180421628 | 180421628 | Missense | SNP | G | A | BRC33 | NM_006218.2 | p.E726K  |
| PIK3CA | 3 | 180434771 | 180434771 | Missense | SNP | T | A | BRC39 | NM_006218.2 | p.N1044K |
| PIK3CA | 3 | 180434779 | 180434779 | Missense | SNP | A | G | BRC9  | NM_006218.2 | p.H1047R |
| PIK3CA | 3 | 180434779 | 180434779 | Missense | SNP | A | G | BRC10 | NM_006218.2 | p.H1047R |
| PIK3CA | 3 | 180434779 | 180434779 | Missense | SNP | A | G | BRC11 | NM_006218.2 | p.H1047R |
| PIK3CA | 3 | 180434779 | 180434779 | Missense | SNP | A | G | BRC13 | NM_006218.2 | p.H1047R |
| PIK3CA | 3 | 180434779 | 180434779 | Missense | SNP | A | G | BRC15 | NM_006218.2 | p.H1047R |
| PIK3CA | 3 | 180434779 | 180434779 | Missense | SNP | A | G | BRC18 | NM_006218.2 | p.H1047R |
| PIK3CA | 3 | 180434779 | 180434779 | Missense | SNP | A | G | BRC20 | NM_006218.2 | p.H1047R |
| PIK3CA | 3 | 180434779 | 180434779 | Missense | SNP | A | G | BRC24 | NM_006218.2 | p.H1047R |
| PIK3CA | 3 | 180434779 | 180434779 | Missense | SNP | A | G | BRC31 | NM_006218.2 | p.H1047R |
| PIK3CA | 3 | 180434779 | 180434779 | Missense | SNP | A | G | BRC37 | NM_006218.2 | p.H1047R |
| PIK3CA | 3 | 180434779 | 180434779 | Missense | SNP | A | G | BRC40 | NM_006218.2 | p.H1047R |
| PIK3CA | 3 | 180434779 | 180434779 | Missense | SNP | A | G | BRC51 | NM_006218.2 | p.H1047R |
| PIK3CA | 3 | 180434779 | 180434779 | Missense | SNP | A | G | CSB13 | NM_006218.2 | p.H1047R |
| PIK3CA | 3 | 180434779 | 180434779 | Missense | SNP | A | G | CSB17 | NM_006218.2 | p.H1047R |
| PIK3CA | 3 | 180434779 | 180434779 | Missense | SNP | A | G | CSB21 | NM_006218.2 | p.H1047R |
| PIK3CA | 3 | 180434779 | 180434779 | Missense | SNP | A | G | CSB24 | NM_006218.2 | p.H1047R |
| PIK3CA | 3 | 180434779 | 180434779 | Missense | SNP | A | G | CSB27 | NM_006218.2 | p.H1047R |
| PIK3CA | 3 | 180434779 | 180434779 | Missense | SNP | A | G | CSB30 | NM_006218.2 | p.H1047R |
| PIK3CA | 3 | 180434779 | 180434779 | Missense | SNP | A | T | BRC8  | NM_006218.2 | p.H1047L |
| PIK3CA | 3 | 180434779 | 180434779 | Missense | SNP | A | T | BRC50 | NM_006218.2 | p.H1047L |
| PIK3CA | 3 | 180434779 | 180434779 | Missense | SNP | A | T | CSB1  | NM_006218.2 | p.H1047L |
| PIK3CA | 3 | 180434780 | 180434780 | Missense | SNP | T | A | CSB3  | NM_006218.2 | p.H1047Q |
| PIK3CA | 3 | 180434784 | 180434784 | Missense | SNP | G | C | BRC36 | NM_006218.2 | p.G1049R |
| PIK3CA | 3 | 180434784 | 180434784 | Missense | SNP | G | C | CSB12 | NM_006218.2 | p.G1049R |
| ACTL6A | 3 | 180777360 | 180777360 | Nonsense | SNP | C | T | BRC50 | NM_004301.3 | p.Q245*  |
| TTC14  | 3 | 181806744 | 181806744 | Silent   | SNP | C | T | CSB8  | NM_133462.2 | p.I313   |
| B3GNT5 | 3 | 184470770 | 184470770 | Missense | SNP | T | A | CSB22 | NM_032047.4 | p.S164T  |
| YEATS2 | 3 | 184974223 | 184974223 | Missense | SNP | G | A | BRC52 | NM_018023.3 | p.G772E  |
| PARL   | 3 | 185041112 | 185041112 | Silent   | SNP | G | C | BRC31 | NM_018622.1 | p.S256   |
| DVL3   | 3 | 185368131 | 185368131 | Missense | SNP | A | G | BRC32 | NM_004423.3 | p.E423G  |
| ALG3   | 3 | 185444076 | 185444076 | Silent   | SNP | G | A | BRC35 | NM_005787.2 | p.P323   |
| ECE2   | 3 | 185457976 | 185457976 | Missense | SNP | G | T | BRC18 | NM_014693.2 | p.S73I   |
| EIF4G1 | 3 | 185532012 | 185532012 | Missense | SNP | C | T | CSB1  | NM_182917.3 | p.S1440F |

|              |   |           |           |                    |     |   |      |       |                 |         |
|--------------|---|-----------|-----------|--------------------|-----|---|------|-------|-----------------|---------|
| POLR2H       | 3 | 185565627 | 185565627 | Missense           | SNP | G | C    | CSB22 | NM_006232.2     | p.R57P  |
| MAGEF1       | 3 | 185911428 | 185911428 | Silent             | SNP | G | A    | CSB16 | NM_022149.4     | p.A292  |
| LIPH         | 3 | 186727969 | 186727969 | Missense           | SNP | C | T    | BRC50 | NM_139248.2     | p.D209N |
| EIF4A2       | 3 | 187985078 | 187985078 | Missense           | SNP | A | C    | BRC41 | NM_001967.3     | p.D36A  |
| EIF4A2       | 3 | 187985160 | 187985160 | Frame Shift<br>Ins | INS |   | 0 TA | CSB9  | NM_001967.3     | p.I63fs |
| RFC4         | 3 | 187993040 | 187993040 | Missense           | SNP | G | A    | BRC5  | NM_002916.3     | p.S203L |
| MASP1        | 3 | 188436984 | 188436984 | Missense           | SNP | C | G    | BRC11 | NM_139125.1     | p.E457Q |
| TP63         | 3 | 191094894 | 191094894 | Missense           | SNP | C | G    | CSB1  | NM_003722.1     | p.S651C |
| LOC100130481 | 3 | 192010377 | 192010377 | Silent             | SNP | C | T    | BRC31 | XM_001726752.1  | p.L234  |
| CCDC50       | 3 | 192589997 | 192589997 | Missense           | SNP | G | A    | BRC11 | NM_178335.3     | p.M447I |
| PYDC2        | 3 | 192661723 | 192661723 | Silent             | SNP | C | T    | BRC52 | NM_001083308.1  | p.F26   |
| HES1         | 3 | 195338184 | 195338184 | Missense           | SNP | C | G    | CSB3  | NM_005524.2     | p.P104R |
| ATP13A3      | 3 | 195646764 | 195646764 | Missense           | SNP | A | C    | CSB19 | NM_024524.3     | p.I513S |
| TMEM44       | 3 | 195819672 | 195819672 | Missense           | SNP | C | G    | BRC51 | ENST00000392432 | p.Q245H |
| LSG1         | 3 | 195861015 | 195861015 | Nonsense           | SNP | G | T    | BRC21 | NM_018385.2     | p.S240* |
| PAK2         | 3 | 198024075 | 198024075 | Silent             | SNP | G | T    | BRC50 | NM_002577.4     | p.V297  |
| FYTTD1       | 3 | 198979732 | 198979732 | Frame Shift<br>Ins | INS |   | 0 A  | BRC32 | NM_032288.1     | p.R87fs |
| LMLN         | 3 | 199171572 | 199171572 | Missense           | SNP | G | A    | CSB1  | NM_033029.2     | p.R28Q  |
| DGKQ         | 4 | 946245    | 946245    | Missense           | SNP | G | A    | BRC4  | NM_001347.2     | p.T731M |
| WHSC1        | 4 | 1890127   | 1890127   | Missense           | SNP | C | G    | CSB1  | NM_001042424.2  | p.F463L |
| C4orf15      | 4 | 2210238   | 2210238   | Nonsense           | SNP | G | A    | BRC39 | NM_024511.5     | p.Q414* |
| C4orf8       | 4 | 2668029   | 2668029   | Missense           | SNP | G | A    | BRC35 | NM_003704.3     | p.E849K |
| ZNF509       | 4 | 4355337   | 4355337   | Silent             | SNP | C | T    | CSB12 | NM_145291.3     | p.D291  |
| JAKMIP1      | 4 | 6078867   | 6078867   | Silent             | SNP | G | A    | BRC31 | NM_001099433.1  | p.L829  |
| JAKMIP1      | 4 | 6132803   | 6132803   | Silent             | SNP | T | C    | BRC10 | NM_001099433.1  | p.S413  |
| JAKMIP1      | 4 | 6165462   | 6165462   | Missense           | SNP | C | T    | BRC5  | NM_001099433.1  | p.R6Q   |
| MAN2B2       | 4 | 6629206   | 6629206   | Missense           | SNP | G | A    | BRC16 | NM_015274.1     | p.E47K  |
| FBXL5        | 4 | 15247398  | 15247398  | Splice_Site        | SNP | C | T    | BRC35 | NM_012161.2     | e5-1    |
| PROM1        | 4 | 15617272  | 15617272  | Missense           | SNP | C | T    | CSB14 | NM_006017.1     | p.V481I |
| NCRNA00099   | 4 | 21460064  | 21460064  | RNA                | SNP | C | T    | BRC11 | NR_002813.1     | NULL    |
| LOC100131836 | 4 | 21467470  | 21467470  | Nonsense           | SNP | C | T    | BRC24 | XM_001721969.1  | p.Q103* |
| PPARGC1A     | 4 | 23424979  | 23424979  | Missense           | SNP | G | T    | BRC38 | NM_013261.3     | p.Q409K |
| DHX15        | 4 | 24138671  | 24138671  | Nonsense           | SNP | G | A    | BRC41 | NM_001358.2     | p.Q788* |
| ZCCHC4       | 4 | 24923653  | 24923653  | Missense           | SNP | C | G    | CSB1  | NM_024936.2     | p.H42D  |

|                     |   |          |          |          |     |   |   |       |                 |          |
|---------------------|---|----------|----------|----------|-----|---|---|-------|-----------------|----------|
| KIAA0746            | 4 | 25430627 | 25430627 | Missense | SNP | C | T | BRC39 | NM_015187.3     | p.E442K  |
| PCDH7               | 4 | 30332479 | 30332479 | Missense | SNP | G | C | CSB1  | NM_032457.2     | p.E113Q  |
| ARAP2               | 4 | 35888647 | 35888647 | Nonsense | SNP | G | C | BRC31 | NM_015230.2     | p.S416*  |
| C4orf19             | 4 | 37268650 | 37268650 | Missense | SNP | G | T | CSB34 | NM_001104629.1  | p.G193V  |
| TBC1D1              | 4 | 37815254 | 37815254 | Missense | SNP | C | T | CSB1  | NM_015173.2     | p.S1137L |
| TLR1                | 4 | 38474631 | 38474631 | Silent   | SNP | A | G | BRC38 | NM_003263.3     | p.I739   |
| TLR1                | 4 | 38475771 | 38475771 | Silent   | SNP | G | A | BRC39 | NM_003263.3     | p.L359   |
| N4BP2               | 4 | 39799735 | 39799735 | Silent   | SNP | G | A | CSB5  | NM_018177.3     | p.Q1203  |
| N4BP2               | 4 | 39802190 | 39802190 | Missense | SNP | G | C | BRC39 | NM_018177.3     | p.E1434Q |
| CHRNA9              | 4 | 40032303 | 40032303 | Missense | SNP | G | A | BRC13 | NM_017581.2     | p.R21K   |
| SLC30A9             | 4 | 41732093 | 41732093 | Silent   | SNP | T | C | CSB14 | NM_006345.3     | p.L219   |
| GUF1                | 4 | 44392416 | 44392416 | Silent   | SNP | C | T | CSB2  | NM_021927.2     | p.A581   |
| GABRA2              | 4 | 45947260 | 45947260 | Missense | SNP | G | A | CSB8  | NM_000807.2     | p.T393M  |
| GABRA2              | 4 | 46082935 | 46082935 | Missense | SNP | C | T | BRC18 | NM_000807.2     | p.E34K   |
| SPATA18             | 4 | 52632969 | 52632969 | Missense | SNP | G | C | CSB1  | NM_145263.2     | p.Q216H  |
| PDGFRA              | 4 | 54828288 | 54828288 | Missense | SNP | G | A | BRC50 | NM_006206.4     | p.E279K  |
| PDGFRA              | 4 | 54849818 | 54849818 | Missense | SNP | G | A | BRC31 | NM_006206.4     | p.E924K  |
| KIT                 | 4 | 55259324 | 55259324 | Missense | SNP | A | T | BRC33 | NM_000222.2     | p.Q152L  |
| KIT                 | 4 | 55264732 | 55264732 | Missense | SNP | G | A | BRC39 | NM_000222.2     | p.R281K  |
| KIT                 | 4 | 55268031 | 55268031 | Silent   | SNP | C | T | BRC13 | NM_000222.2     | p.F312   |
| CLOCK               | 4 | 56011078 | 56011078 | Missense | SNP | T | C | CSB25 | NM_004898.2     | p.T429A  |
| REST                | 4 | 57472170 | 57472170 | Missense | SNP | T | C | CSB7  | NM_005612.3     | p.S204fs |
| ENSG0000020568<br>2 | 4 | 61975771 | 61975771 | Del      | DEL | T | 0 | CSB7  | NM_005612.3     | p.S204fs |
| SRD5A2L2            | 4 | 61975771 | 61975771 | Missense | SNP | C | T | BRC39 | ENST00000381217 | p.E250K  |
| CENPC1              | 4 | 64862995 | 64862995 | Nonsense | SNP | C | A | CSB2  | NM_001010874.4  | p.E173*  |
| STAP1               | 4 | 68038377 | 68038377 | Missense | SNP | A | G | BRC3  | NM_001812.2     | p.V858A  |
| ENSG0000020742<br>8 | 4 | 68119450 | 68119450 | Silent   | SNP | C | T | BRC50 | NM_012108.2     | p.T58    |
| UGT2B28             | 4 | 68552228 | 68552228 | RNA      | SNP | T | C | BRC15 | ENST00000384697 | NULL     |
| SULT1B1             | 4 | 70191003 | 70191003 | Nonsense | SNP | C | T | BRC50 | NM_053039.1     | p.Q399*  |
| C4orf35             | 4 | 70655515 | 70655515 | Missense | SNP | G | C | BRC49 | NM_014465.3     | p.P4A    |
| AMBN                | 4 | 71236213 | 71236213 | Missense | SNP | G | C | CSB1  | NM_033122.3     | p.E290Q  |
| RUFY3               | 4 | 71506824 | 71506824 | Missense | SNP | G | A | BRC32 | NM_016519.4     | p.V378I  |
| NPFRR2              | 4 | 71874132 | 71874132 | Missense | SNP | G | C | CSB1  | NM_001037442.2  | p.K432N  |
| NPFRR2              | 4 | 73232095 | 73232095 | Missense | SNP | C | T | CSB26 | NM_004885.1     | p.A424V  |



|                     |   |           |           |                       |     |      |   |         |                 |          |
|---------------------|---|-----------|-----------|-----------------------|-----|------|---|---------|-----------------|----------|
| ENSG0000021083<br>9 | 4 | 74111448  | 74111448  | RNA                   | SNP | G    | A | BRC51   | ENST00000388104 | NULL     |
| ANKRD17             | 4 | 74175407  | 74175407  | Missense              | SNP | A    | C | CSB24   | NM_032217.3     | p.F2268V |
| RASSF6              | 4 | 74700489  | 74700489  | Missense              | SNP | G    | C | BRC39   | ENST00000335049 | p.L31V   |
| CXCL9               | 4 | 77146447  | 77146447  | Silent<br>Frame Shift | SNP | G    | C | BRC30   | NM_002416.1     | p.T23    |
| SHROOM3             | 4 | 77881026  | 77881026  | Del                   | DEL | C    |   | 0 BRC3  | NM_020859.3     | p.Q892fs |
| FRAS1               | 4 | 79457558  | 79457558  | Nonsense              | SNP | C    | G | CSB1    | ENST00000380674 | p.S611*  |
| BMP2K               | 4 | 79991223  | 79991223  | Missense              | SNP | A    | G | BRC6    | NM_198892.3     | p.H291R  |
| ARD1B               | 4 | 80465815  | 80465815  | Missense              | SNP | G    | A | BRC48   | NM_032693.2     | p.H81Y   |
| GK2                 | 4 | 80546878  | 80546878  | Missense              | SNP | C    | T | BRC41   | NM_033214.2     | p.A501T  |
| FGF5                | 4 | 81407185  | 81407185  | Silent                | SNP | C    | T | BRC18   | NM_004464.3     | p.S61    |
| BMP3                | 4 | 82186649  | 82186649  | Silent                | SNP | A    | G | BRC16   | NM_001201.2     | p.Q350   |
| RASGEF1B            | 4 | 82574856  | 82574856  | Silent                | SNP | A    | G | CSB16   | NM_152545.1     | p.G387   |
| FLJ12993            | 4 | 83636289  | 83636289  | Missense              | SNP | G    | C | CSB1    | NM_001080506.1  | p.L107V  |
| SEC31A              | 4 | 83997168  | 83997168  | Missense              | SNP | C    | A | CSB1    | NM_001077207.1  | p.Q614H  |
| SEC31A              | 4 | 84007436  | 84007436  | Nonsense              | SNP | G    | A | BRC13   | NM_001077207.1  | p.R314*  |
| COQ2                | 4 | 84407882  | 84407882  | Missense              | SNP | A    | T | CSB21   | NM_015697.6     | p.W291R  |
| HPSE                | 4 | 84450909  | 84450909  | Missense              | SNP | T    | C | CSB26   | NM_001098540.1  | p.M278V  |
| PTPN13              | 4 | 87857219  | 87857219  | Missense              | SNP | C    | T | CSB1    | NM_080685.2     | p.S437L  |
| SLC10A6             | 4 | 87973516  | 87973516  | Nonsense              | SNP | G    | A | CSB1    | NM_197965.2     | p.Q155*  |
| AFF1                | 4 | 88187315  | 88187315  | Missense              | SNP | G    | C | BRC39   | NM_005935.2     | p.E195Q  |
| KLHL8               | 4 | 88335706  | 88335706  | Missense              | SNP | C    | T | BRC11   | NM_020803.3     | p.D4N    |
| SPARCL1             | 4 | 88635246  | 88635246  | Missense              | SNP | C    | T | BRC51   | NM_004684.1     | p.D38N   |
| FAM13A              | 4 | 89889990  | 89889990  | Silent                | SNP | C    | T | CSB22   | NM_014883.1     | p.K678   |
| TIGD2               | 4 | 90253232  | 90253232  | Missense              | SNP | C    | G | BRC18   | NM_145715.2     | p.F28L   |
| MMRN1               | 4 | 91035683  | 91035683  | Missense              | SNP | C    | G | CSB16   | NM_007351.2     | p.R180G  |
| GRID2               | 4 | 94595842  | 94595842  | Missense              | SNP | G    | T | CSB6    | NM_001510.2     | p.D518Y  |
| PDLIM5              | 4 | 95717598  | 95717598  | Splice_Site           | SNP | G    | A | BRC51   | ENST00000318007 | e5+1     |
| C4orf17             | 4 | 100653284 | 100653284 | Missense              | SNP | C    | T | CSB24   | NM_032149.1     | p.S8F    |
| LOC285556           | 4 | 100789763 | 100789763 | Missense              | SNP | G    | A | BRC35   | XM_373030.1     | p.T1722I |
| LOC285556           | 4 | 100793413 | 100793413 | Silent                | SNP | G    | T | BRC35   | XM_373030.1     | p.G505   |
| LOC256880           | 4 | 101091505 | 101091505 | RNA                   | SNP | A    | T | BRC19   | NR_002799.1     | NULL     |
| CISD2               | 4 | 104009736 | 104009736 | Silent<br>Frame Shift | SNP | G    | A | CSB1    | NM_001008388.3  | p.L18    |
| TBCKL               | 4 | 107236187 | 107236190 | Del                   | DEL | TGCA |   | 0 BRC18 | NM_033115.2     | p.A761fs |



|                     |   |           |           |                    |     |   |   |        |                 |          |
|---------------------|---|-----------|-----------|--------------------|-----|---|---|--------|-----------------|----------|
| AGXT2L1             | 4 | 109900906 | 109900906 | Missense           | SNP | G | A | BRC39  | NM_031279.2     | p.S21L   |
| ELOVL6              | 4 | 111192269 | 111192269 | Missense           | SNP | C | G | BRC52  | NM_024090.1     | p.D158H  |
| NEUROG2             | 4 | 113655576 | 113655576 | Missense           | SNP | G | A | CSB19  | NM_024019.2     | p.R169C  |
| LOC91431            | 4 | 113703880 | 113703880 | Splice_Site        | SNP | C | G | CSB1   | NM_001099776.1  | e6-1     |
| C4orf21             | 4 | 113760747 | 113760747 | Missense           | SNP | C | T | BRC50  | NM_018392.3     | p.E71K   |
| LARP7               | 4 | 113791145 | 113791145 | Missense           | SNP | G | T | BRC10  | NM_015454.1     | p.K458N  |
| ANK2                | 4 | 114497225 | 114497225 | Missense           | SNP | C | T | CSB15  | NM_001148.1     | p.P2668S |
| CEP170L             | 4 | 119694622 | 119694622 | Silent             | SNP | T | C | CSB19  | ENST00000336415 | p.A267   |
| PDE5A               | 4 | 120646506 | 120646506 | Frame Shift<br>Del | DEL | C |   | 0 CSB3 | NM_001083.3     | p.R740fs |
| PDE5A               | 4 | 120693241 | 120693241 | Splice_Site        | SNP | C | G | CSB33  | NM_001083.3     | e9-1     |
| ENSG0000022300<br>6 | 4 | 122201939 | 122201939 | RNA                | SNP | C | G | BRC39  | ENST00000411074 | NULL     |
| QRFR                | 4 | 122470038 | 122470038 | Missense           | SNP | C | T | CSB1   | NM_198179.2     | p.D393N  |
| TRPC3               | 4 | 123073144 | 123073144 | Missense           | SNP | G | A | BRC14  | NM_003305.1     | p.A167V  |
| KIAA1109            | 4 | 123367372 | 123367372 | Missense           | SNP | G | A | CSB1   | NM_015312.2     | p.E952K  |
| KIAA1109            | 4 | 123458847 | 123458847 | Missense           | SNP | G | C | BRC41  | NM_015312.2     | p.R3589P |
| ANKRD50             | 4 | 125811049 | 125811049 | Missense           | SNP | C | T | CSB1   | NM_020337.1     | p.D945N  |
| ANKRD50             | 4 | 125811642 | 125811642 | Missense           | SNP | T | C | BRC7   | NM_020337.1     | p.D747G  |
| FAT4                | 4 | 126609182 | 126609182 | Missense           | SNP | C | A | BRC11  | NM_024582.4     | p.P3954T |
| PLK4                | 4 | 129035685 | 129035685 | Missense           | SNP | G | A | BRC50  | NM_014264.3     | p.G897D  |
| LARP2               | 4 | 129319058 | 129319058 | Silent             | SNP | G | A | CSB31  | NM_018078.2     | p.Q569   |
| PCDH10              | 4 | 134291482 | 134291482 | Missense           | SNP | A | T | BRC15  | NM_032961.1     | p.N246I  |
| PCDH10              | 4 | 134295520 | 134295520 | Splice_Site        | SNP | A | G | BRC32  | NM_032961.1     | e3-2     |
| ELF2                | 4 | 140199956 | 140199956 | Silent             | SNP | T | C | BRC41  | NM_201999.2     | p.Q459   |
| NARG1               | 4 | 140501161 | 140501161 | Missense           | SNP | G | A | CSB1   | NM_057175.3     | p.E490K  |
| SMARCA5             | 4 | 144679490 | 144679490 | Silent             | SNP | A | G | BRC49  | NM_003601.2     | p.V573   |
| EDNRA               | 4 | 148626626 | 148626626 | Missense           | SNP | C | T | BRC31  | NM_001957.2     | p.P115S  |
| ARHGAP10            | 4 | 149163946 | 149163946 | Missense           | SNP | C | G | CSB3   | NM_024605.3     | p.S600W  |
| LRBA                | 4 | 151577382 | 151577382 | Missense           | SNP | G | A | CSB24  | NM_006726.2     | p.H2300Y |
| LRBA                | 4 | 151875896 | 151875896 | Silent             | SNP | C | T | BRC31  | NM_006726.2     | p.Q1906  |
| FAM160A1            | 4 | 152718448 | 152718448 | Nonsense           | SNP | C | T | CSB1   | XM_001718535.1  | p.Q167*  |
| FAM160A1            | 4 | 152796923 | 152796923 | Missense           | SNP | C | G | CSB1   | XM_001718535.1  | p.Q907E  |
| DCHS2               | 4 | 155377576 | 155377576 | Missense           | SNP | C | T | CSB20  | NM_017639.1     | p.E2105K |
| DCHS2               | 4 | 155473737 | 155473737 | Missense           | SNP | C | T | CSB22  | NM_017639.1     | p.V526I  |
| NPY2R               | 4 | 156355248 | 156355248 | Missense           | SNP | C | T | BRC44  | NM_000910.2     | p.S236L  |

|          |   |           |           |             |     |   |   |       |                |          |
|----------|---|-----------|-----------|-------------|-----|---|---|-------|----------------|----------|
| MAP9     | 4 | 156513810 | 156513810 | Missense    | SNP | C | T | BRC50 | NM_001039580.1 | p.E137K  |
| ACCN5    | 4 | 156972510 | 156972510 | Missense    | SNP | G | A | BRC7  | NM_017419.2    | p.L415F  |
| GLRB     | 4 | 158277215 | 158277215 | Missense    | SNP | G | C | BRC31 | NM_000824.3    | p.E148Q  |
| C4orf46  | 4 | 159810333 | 159810333 | Missense    | SNP | G | C | BRC3  | NM_001008393.2 | p.S75C   |
| ETFDH    | 4 | 159836150 | 159836150 | Missense    | SNP | G | A | BRC18 | NM_004453.2    | p.E246K  |
| FSTL5    | 4 | 162526429 | 162526429 | Missense    | SNP | C | G | BRC50 | NM_020116.1    | p.D822H  |
| FSTL5    | 4 | 162595712 | 162595712 | Missense    | SNP | C | T | BRC38 | NM_020116.1    | p.G579R  |
| FSTL5    | 4 | 162900082 | 162900082 | Missense    | SNP | C | T | BRC34 | NM_020116.1    | p.V220I  |
| KLHL2    | 4 | 166458466 | 166458466 | Missense    | SNP | G | A | CSB24 | NM_007246.2    | p.G550R  |
| NEK1     | 4 | 170595986 | 170595986 | Splice_Site | SNP | C | G | BRC50 | NM_012224.1    | e25-1    |
| CLCN3    | 4 | 170855303 | 170855303 | Missense    | SNP | C | G | BRC39 | NM_173872.2    | p.S469C  |
| FBXO8    | 4 | 175417476 | 175417476 | Silent      | SNP | C | T | BRC16 | NM_012180.2    | p.L135   |
| ODZ3     | 4 | 183910115 | 183910115 | Silent      | SNP | G | C | BRC15 | NM_001080477.1 | p.P1266  |
| STOX2    | 4 | 185168140 | 185168140 | Silent      | SNP | C | T | BRC31 | NM_020225.1    | p.D385   |
| SNX25    | 4 | 186497612 | 186497612 | Missense    | SNP | G | T | CSB15 | NM_031953.2    | p.W503L  |
| SORBS2   | 4 | 186782453 | 186782453 | Missense    | SNP | G | A | BRC47 | NM_021069.1    | p.T371M  |
| TLR3     | 4 | 187240510 | 187240510 | Missense    | SNP | C | A | BRC51 | NM_003265.2    | p.L226I  |
| FAT1     | 4 | 187778113 | 187778113 | Silent      | SNP | G | A | CSB13 | NM_005245.3    | p.N2207  |
| FAT1     | 4 | 187794769 | 187794769 | Missense    | SNP | C | A | CSB16 | NM_005245.3    | p.K1312N |
| ZFP42    | 4 | 189161460 | 189161460 | Missense    | SNP | G | A | BRC9  | NM_174900.3    | p.A169T  |
| PLEKHG4B | 5 | 214960    | 214960    | Silent      | SNP | C | G | CSB31 | NM_052909.3    | p.V494   |
| PLEKHG4B | 5 | 216038    | 216038    | Missense    | SNP | C | T | CSB9  | NM_052909.3    | p.R595W  |
| AHRR     | 5 | 475903    | 475903    | Silent      | SNP | C | T | CSB1  | NM_020731.3    | p.F171   |
| SLC9A3   | 5 | 535669    | 535669    | Silent      | SNP | G | A | BRC18 | NM_004174.2    | p.I450   |
| TPPP     | 5 | 730968    | 730968    | Missense    | SNP | C | G | CSB15 | NM_007030.2    | p.E70Q   |
| ZDHHC11B | 5 | 819884    | 819884    | Missense    | SNP | C | G | CSB7  | XM_926053.1    | p.G51R   |
| SLC12A7  | 5 | 1110642   | 1110642   | Silent      | SNP | C | T | CSB19 | NM_006598.2    | p.K990   |
| TERT     | 5 | 1346454   | 1346454   | Missense    | SNP | T | C | CSB30 | NM_198253.2    | p.D516G  |
| KIAA0947 | 5 | 5542291   | 5542291   | Missense    | SNP | G | A | BRC17 | NM_015325.1    | p.V2217M |
| SRD5A1   | 5 | 6709275   | 6709275   | Missense    | SNP | G | T | BRC3  | NM_001047.2    | p.G182V  |
| FASTKD3  | 5 | 7920914   | 7920914   | Nonsense    | SNP | T | A | CSB25 | NM_024091.2    | p.K95*   |
| SEMA5A   | 5 | 9103557   | 9103557   | Missense    | SNP | G | T | BRC26 | NM_003966.2    | p.A953E  |
| CTNND2   | 5 | 11170644  | 11170644  | Missense    | SNP | C | G | BRC39 | NM_001332.2    | p.R732T  |
| DNAH5    | 5 | 13806628  | 13806628  | Missense    | SNP | G | C | CSB1  | NM_001369.2    | p.S3529C |
| DNAH5    | 5 | 13936091  | 13936091  | Missense    | SNP | C | A | BRC51 | NM_001369.2    | p.Q1032H |

|                 |   |          |          |              |     |     |   |       |                 |                     |
|-----------------|---|----------|----------|--------------|-----|-----|---|-------|-----------------|---------------------|
| DNAH5           | 5 | 13939228 | 13939228 | Missense     | SNP | A   | G | BRC32 | NM_001369.2     | p.V863A             |
| TRIO            | 5 | 14524537 | 14524537 | Missense     | SNP | G   | C | BRC50 | NM_007118.2     | p.E1958D            |
| MARCH11         | 5 | 16120720 | 16120720 | Missense     | SNP | C   | T | CSB29 | NM_001102562.1  | p.V357I             |
| ENSG00000201715 | 5 | 17398838 | 17398838 | RNA          | SNP | C   | T | BRC38 | ENST00000364845 | NULL                |
| LOC340096       | 5 | 17544872 | 17544872 | Silent       | SNP | C   | T | BRC32 | XM_293943.2     | p.A47               |
| CDH18           | 5 | 19757273 | 19757273 | Missense     | SNP | C   | T | BRC44 | NM_004934.2     | p.A195T             |
| CDH12           | 5 | 21800879 | 21800879 | Missense     | SNP | C   | T | BRC39 | NM_004061.3     | p.E494K<br>p.K174in |
| PRDM9           | 5 | 23558177 | 23558179 | In Frame Del | DEL | GAA | 0 | BRC32 | NM_020227.2     | Frame del           |
| CDH10           | 5 | 24629183 | 24629183 | Missense     | SNP | C   | G | CSB1  | NM_006727.2     | p.W58C              |
| CDH9            | 5 | 26917203 | 26917203 | Silent       | SNP | G   | A | BRC37 | NM_016279.3     | p.N723              |
| LOC391774       | 5 | 31089723 | 31089723 | RNA          | SNP | G   | A | BRC31 | XR_017200.1     | NULL                |
| CDH6            | 5 | 31353717 | 31353717 | Missense     | SNP | C   | T | BRC51 | NM_004932.2     | p.A604V             |
| RNASEN          | 5 | 31562340 | 31562340 | Missense     | SNP | G   | A | BRC39 | NM_013235.1     | p.H153Y             |
| PDZD2           | 5 | 32125603 | 32125603 | Missense     | SNP | G   | A | BRC39 | NM_178140.2     | p.E2098K            |
| PDZD2           | 5 | 32136781 | 32136781 | Silent       | SNP | A   | C | BRC41 | ENST00000397559 | p.R23               |
| PDZD2           | 5 | 32136808 | 32136808 | Missense     | SNP | G   | C | BRC36 | ENST00000397559 | p.G32R              |
| RXFP3           | 5 | 33973710 | 33973710 | Missense     | SNP | G   | A | CSB12 | NM_016568.2     | p.A370T             |
| PRLR            | 5 | 35101895 | 35101895 | Missense     | SNP | C   | T | BRC39 | NM_000949.4     | p.E308K             |
| SLC1A3          | 5 | 36722003 | 36722003 | Missense     | SNP | C   | A | BRC33 | NM_004172.4     | p.L502M             |
| C5orf42         | 5 | 37174642 | 37174642 | Missense     | SNP | A   | G | CSB27 | NM_023073.2     | p.I1754T            |
| WDR70           | 5 | 37758745 | 37758745 | Missense     | SNP | C   | T | BRC15 | NM_018034.2     | p.R517W             |
| RICTOR          | 5 | 39026846 | 39026846 | Missense     | SNP | C   | G | CSB1  | NM_152756.3     | p.R182T             |
| FYB             | 5 | 39170828 | 39170828 | Missense     | SNP | C   | T | CSB1  | NM_001465.3     | p.D521N             |
| FYB             | 5 | 39237816 | 39237816 | Missense     | SNP | C   | T | BRC44 | NM_001465.3     | p.G335E             |
| C9              | 5 | 39347135 | 39347135 | Silent       | SNP | T   | C | BRC5  | NM_001737.3     | p.K324              |
| CARD6           | 5 | 40895926 | 40895926 | Missense     | SNP | G   | A | BRC49 | ENST00000381677 | p.R304H             |
| HEATR7B2        | 5 | 41102979 | 41102979 | Missense     | SNP | C   | G | CSB1  | NM_173489.4     | p.M63I              |
| PLCXD3          | 5 | 41418351 | 41418351 | Missense     | SNP | G   | T | BRC51 | NM_001005473.2  | p.P49Q              |
| NNT             | 5 | 43692560 | 43692560 | Missense     | SNP | A   | C | BRC42 | NM_012343.3     | p.N781T             |
| EMB             | 5 | 49734966 | 49734966 | Missense     | SNP | A   | T | BRC39 | NM_198449.2     | p.L227H             |
| PARP8           | 5 | 50147095 | 50147095 | Missense     | SNP | G   | A | BRC39 | NM_024615.2     | p.E550K             |
| LOC642366       | 5 | 50710182 | 50710182 | RNA          | SNP | C   | T | BRC50 | XR_041353.1     | NULL                |
| SNX18           | 5 | 53850050 | 53850050 | Silent       | SNP | C   | T | BRC32 | NM_052870.1     | p.L171              |
| PPAP2A          | 5 | 54757495 | 54757495 | Missense     | SNP | C   | G | CSB22 | NM_176895.2     | p.D228H             |

|              |   |          |          |              |     |                  |      |         |                 |                                    |
|--------------|---|----------|----------|--------------|-----|------------------|------|---------|-----------------|------------------------------------|
| MAP3K1       | 5 | 56196978 | 56196978 | Missense     | SNP | C                | G    | BRC8    | NM_005921.1     | p.R364G                            |
| MAP3K1       | 5 | 56197437 | 56197437 | Ins          | INS |                  | 0 A  | BRC18   | NM_005921.1     | p.H393fs                           |
| MAP3K1       | 5 | 56197437 | 56197437 | Frame Shift  | INS |                  | 0 TA | CSB14   | NM_005921.1     | p.H393fs                           |
| MAP3K1       | 5 | 56197439 | 56197439 | Ins          | INS |                  |      | CSB14   | NM_005921.1     | p.H393Q                            |
| MAP3K1       | 5 | 56197551 | 56197552 | Missense     | SNP | C                | G    | CSB14   | NM_005921.1     | p.H393Q                            |
| MAP3K1       | 5 | 56197551 | 56197552 | Frame Shift  | DEL | TC               |      | 0 BRC23 | NM_005921.1     | p.S431fs                           |
| MAP3K1       | 5 | 56213653 | 56213653 | Del          | DEL | C                | T    | CSB1    | NM_005921.1     | p.Q957*                            |
| MAP3K1       | 5 | 56213820 | 56213820 | Nonsense     | SNP | C                | T    | CSB1    | NM_005921.1     | p.Q957*                            |
| MAP3K1       | 5 | 56213820 | 56213820 | Frame Shift  | INS |                  | 0 A  | CSB26   | NM_005921.1     | p.R1012fs                          |
| MAP3K1       | 5 | 56213935 | 56213935 | Ins          | INS |                  | 0 A  | CSB26   | NM_005921.1     | p.R1012fs                          |
| MAP3K1       | 5 | 56213935 | 56213935 | Frame Shift  | DEL | C                |      | 0 CSB27 | NM_005921.1     | p.L1052fs                          |
| MAP3K1       | 5 | 56215247 | 56215247 | Del          | DEL | C                |      | 0 CSB27 | NM_005921.1     | p.L1052fs                          |
| MAP3K1       | 5 | 56215247 | 56215247 | Ins          | INS |                  | 0 A  | BRC8    | NM_005921.1     | p.M1269fs                          |
| MAP3K1       | 5 | 56216279 | 56216281 | In Frame Del | DEL | AAG              |      | 0 CSB1  | NM_005921.1     | p.E1286in<br>Frame del             |
| MAP3K1       | 5 | 56217564 | 56217564 | Nonsense     | SNP | C                | A    | BRC33   | NM_005921.1     | p.S1344*<br>p.V1346in<br>Frame del |
| MAP3K1       | 5 | 56217565 | 56217567 | In Frame Del | DEL | AGT              |      | 0 CSB17 | NM_005921.1     | p.Q1494*                           |
| MAP3K1       | 5 | 56225205 | 56225205 | Nonsense     | SNP | C                | T    | BRC18   | NM_005921.1     | p.Q1494*                           |
| MIER3        | 5 | 56255030 | 56255030 | Silent       | SNP | G                | T    | BRC38   | NM_152622.3     | p.P444                             |
| PLK2         | 5 | 57788168 | 57788169 | Frame Shift  | SNP | G                | T    | BRC38   | NM_152622.3     | p.P444                             |
| PLK2         | 5 | 57788168 | 57788169 | Del          | DEL | CT               |      | 0 BRC35 | NM_006622.2     | p.R387fs                           |
| GAPT         | 5 | 57826341 | 57826341 | Missense     | SNP | C                | T    | BRC11   | NM_152687.2     | p.S74L                             |
| ERCC8        | 5 | 60276518 | 60276518 | Silent       | SNP | C                | T    | CSB1    | NM_000082.3     | p.R25                              |
| IPO11        | 5 | 61868289 | 61868289 | Missense     | SNP | T                | A    | CSB7    | ENST00000409296 | p.L738Q                            |
| HTR1A        | 5 | 63292432 | 63292432 | Missense     | SNP | C                | T    | BRC15   | NM_000524.2     | p.E291K                            |
| HTR1A        | 5 | 63292913 | 63292913 | Silent       | SNP | G                | A    | BRC7    | NM_000524.2     | p.I130                             |
| RGS7BP       | 5 | 63839334 | 63839334 | Missense     | SNP | A                | G    | BRC22   | NM_001029875.1  | p.E69G                             |
| ADAMTS6      | 5 | 64592195 | 64592195 | Silent       | SNP | G                | A    | BRC50   | NM_197941.2     | p.S606                             |
| MAST4        | 5 | 66468196 | 66468196 | Silent       | SNP | G                | A    | BRC12   | NM_015183.1     | p.Q625<br>p.KPDL567in<br>Frame del |
| PIK3R1       | 5 | 67626860 | 67626871 | In Frame Del | DEL | TTAAAC<br>CAGACC |      | 0 BRC44 | NM_181523.2     | p.N581S<br>p.E118in<br>Frame del   |
| BDP1         | 5 | 70826934 | 70826934 | Missense     | SNP | A                | G    | BRC26   | NM_018429.2     | p.N581S<br>p.E118in<br>Frame del   |
| FCHO2        | 5 | 72322299 | 72322301 | In Frame Del | DEL | AAG              |      | 0 CSB19 | NM_138782.1     | p.D666N                            |
| LOC100131794 | 5 | 74412203 | 74412203 | Missense     | SNP | C                | T    | BRC21   | XM_001722188.1  | p.D666N                            |
| SV2C         | 5 | 75463423 | 75463423 | Missense     | SNP | A                | G    | BRC52   | NM_014979.1     | p.N31S                             |
| SV2C         | 5 | 75656968 | 75656968 | Missense     | SNP | A                | G    | CSB9    | NM_014979.1     | p.N675S                            |
| PDE8B        | 5 | 76657213 | 76657213 | Missense     | SNP | C                | T    | CSB1    | NM_003719.1     | p.P165S                            |

|           |   |           |           |                         |     |   |      |       |                |           |
|-----------|---|-----------|-----------|-------------------------|-----|---|------|-------|----------------|-----------|
| TBCA      | 5 | 77039918  | 77039918  | Missense                | SNP | C | G    | CSB1  | NM_004607.2    | p.E22Q    |
| AP3B1     | 5 | 77547721  | 77547721  | Missense                | SNP | C | G    | BRC50 | NM_003664.3    | p.V234L   |
| DMGDH     | 5 | 78336875  | 78336875  | Missense                | SNP | C | T    | CSB1  | NM_013391.2    | p.E788K   |
| BHMT2     | 5 | 78412319  | 78412319  | Missense                | SNP | A | C    | BRC29 | NM_017614.3    | p.K104N   |
| CMYA5     | 5 | 79062875  | 79062875  | Missense                | SNP | C | G    | BRC11 | NM_153610.3    | p.S844C   |
| CMYA5     | 5 | 79070743  | 79070743  | Missense                | SNP | G | T    | BRC12 | NM_153610.3    | p.A3467S  |
| THBS4     | 5 | 79408479  | 79408479  | Silent                  | SNP | C | T    | CSB1  | NM_003248.3    | p.V646    |
| ACOT12    | 5 | 80667477  | 80667477  | Splice_Site             | SNP | C | G    | BRC31 | NM_130767.2    | e12-1     |
| ATP6AP1L  | 5 | 81649731  | 81649731  | Missense                | SNP | C | A    | BRC41 | NM_001017971.1 | p.D177E   |
| ERAP2     | 5 | 96241472  | 96241472  | Missense                | SNP | C | G    | BRC39 | NM_022350.1    | p.I109M   |
| FLJ43080  | 5 | 110030895 | 110030895 | Missense                | SNP | G | T    | BRC35 | XM_001719018.2 | p.P18T    |
| SLC25A46  | 5 | 110102757 | 110102757 | Missense                | SNP | G | C    | CSB7  | NM_138773.1    | p.G13A    |
| APC       | 5 | 112185506 | 112185506 | Missense                | SNP | G | A    | BRC39 | NM_000038.4    | p.E443K   |
| CCDC112   | 5 | 114633392 | 114633392 | Silent                  | SNP | A | G    | BRC15 | NM_001040440.2 | p.D445    |
| CCDC112   | 5 | 114635209 | 114635209 | Nonsense                | SNP | C | T    | BRC51 | NM_001040440.2 | p.W311*   |
| TMED7     | 5 | 114980039 | 114980039 | Missense                | SNP | C | T    | BRC50 | NM_181836.4    | p.M147I   |
| LVRN      | 5 | 115326839 | 115326839 | Missense<br>Frame Shift | SNP | C | T    | BRC39 | NM_173800.4    | p.S209L   |
| DMXL1     | 5 | 118513201 | 118513201 | Ins                     | INS |   | 0 TC | CSB16 | NM_005509.4    | p.I1261fs |
| SNCAIP    | 5 | 121804316 | 121804316 | Missense                | SNP | G | A    | CSB20 | NM_005460.2    | p.A464T   |
| CEP120    | 5 | 122736339 | 122736339 | Missense                | SNP | C | G    | BRC50 | NM_153223.2    | p.K795N   |
| MEGF10    | 5 | 126799012 | 126799012 | Missense                | SNP | G | A    | BRC39 | NM_032446.2    | p.G679E   |
| FBN2      | 5 | 127664420 | 127664420 | Missense                | SNP | C | G    | CSB21 | NM_001999.3    | p.E2052Q  |
| FBN2      | 5 | 127728257 | 127728257 | Missense                | SNP | C | T    | BRC23 | NM_001999.3    | p.R788H   |
| RAPGEF6   | 5 | 130862144 | 130862144 | Missense                | SNP | G | A    | CSB2  | NM_016340.4    | p.P437L   |
| ACSL6     | 5 | 131340282 | 131340282 | Silent                  | SNP | C | A    | BRC30 | NM_001009185.1 | p.G316    |
| RAD50     | 5 | 131943654 | 131943654 | Missense                | SNP | G | T    | CSB1  | NM_005732.2    | p.L251F   |
| RAD50     | 5 | 132004337 | 132004337 | Missense                | SNP | T | A    | BRC4  | NM_005732.2    | p.D1231E  |
| AFF4      | 5 | 132260547 | 132260547 | Missense                | SNP | C | G    | BRC50 | NM_014423.3    | p.Q558H   |
| ZCCHC10   | 5 | 132370394 | 132370394 | Silent                  | SNP | C | T    | BRC13 | NM_017665.1    | p.K53     |
| PHF15     | 5 | 133924351 | 133924351 | Silent                  | SNP | C | T    | CSB21 | NM_015288.4    | p.D163    |
| SEC24A    | 5 | 134038792 | 134038792 | Silent                  | SNP | C | G    | CSB1  | NM_021982.1    | p.L379    |
| SEC24A    | 5 | 134084656 | 134084656 | Missense                | SNP | T | C    | CSB21 | NM_021982.1    | p.Y1014H  |
| LOC153328 | 5 | 135216377 | 135216377 | Missense                | SNP | G | A    | BRC13 | NM_145282.4    | p.R130Q   |
| LOC153328 | 5 | 135235293 | 135235293 | Silent                  | SNP | G | A    | CSB15 | NM_145282.4    | p.A222    |

|                     |   |           |           |              |     |     |   |         |                 |                                  |
|---------------------|---|-----------|-----------|--------------|-----|-----|---|---------|-----------------|----------------------------------|
| ETF1                | 5 | 137877275 | 137877275 | Missense     | SNP | G   | A | CSB1    | NM_004730.2     | p.S141L                          |
| SLC23A1             | 5 | 138735714 | 138735714 | Silent       | SNP | C   | A | BRC18   | NM_152685.4     | p.L563                           |
| DNAJC18             | 5 | 138789852 | 138789852 | Missense     | SNP | C   | T | BRC50   | NM_152686.2     | p.R156Q                          |
| CD14                | 5 | 139991639 | 139991639 | Silent       | SNP | G   | T | BRC29   | NM_000591.2     | p.R372                           |
| PCDHA1              | 5 | 140147957 | 140147957 | Missense     | SNP | C   | T | CSB19   | NM_018900.2     | p.T633M                          |
| PCDHA3              | 5 | 140162833 | 140162833 | Missense     | SNP | C   | T | CSB1    | NM_018906.2     | p.R623C<br>p.E187in<br>Frame del |
| PCDHA5              | 5 | 140182097 | 140182099 | In Frame Del | DEL | GAA |   | 0 CSB28 | NM_018908.2     |                                  |
| PCDHA5              | 5 | 140182631 | 140182631 | Missense     | SNP | C   | G | CSB1    | NM_018908.2     | p.P363A                          |
| PCDHA5              | 5 | 140183325 | 140183325 | Missense     | SNP | G   | A | BRC49   | NM_018908.2     | p.R594H                          |
| PCDHA8              | 5 | 140202820 | 140202820 | Missense     | SNP | C   | T | CSB22   | NM_018911.2     | p.A577V                          |
| PCDHA9              | 5 | 140208397 | 140208397 | Missense     | SNP | G   | A | CSB14   | NM_031857.3     | p.V45M                           |
| PCDHA9              | 5 | 140209913 | 140209913 | Missense     | SNP | C   | T | CSB28   | NM_031857.3     | p.T550M                          |
| PCDHB1              | 5 | 140411741 | 140411741 | Missense     | SNP | C   | A | BRC35   | NM_013340.2     | p.Q168K                          |
| PCDHB1              | 5 | 140413401 | 140413401 | Missense     | SNP | G   | C | BRC50   | NM_013340.2     | p.R721T                          |
| PCDHB16             | 5 | 140543210 | 140543210 | Missense     | SNP | A   | T | CSB34   | NM_020957.1     | p.T298S                          |
| PCDHGA2             | 5 | 140700397 | 140700397 | Missense     | SNP | G   | A | BRC42   | NM_018915.2     | p.A559T                          |
| PCDHGA4             | 5 | 140715176 | 140715176 | Silent       | SNP | C   | T | CSB31   | NM_018917.2     | p.F75                            |
| PCDHGA6             | 5 | 140735544 | 140735544 | Silent       | SNP | C   | T | CSB30   | NM_018919.2     | p.D570                           |
| PCDHGA7             | 5 | 140743107 | 140743107 | Missense     | SNP | C   | T | BRC51   | NM_018920.2     | p.P153S                          |
| PCDHGC3             | 5 | 140837831 | 140837831 | Missense     | SNP | C   | G | CSB3    | NM_002588.2     | p.S655W                          |
| DIAPH1              | 5 | 140946896 | 140946896 | Missense     | SNP | G   | A | CSB1    | NM_005219.2     | p.S66F                           |
| HDAC3               | 5 | 140985480 | 140985480 | Missense     | SNP | G   | T | CSB1    | NM_003883.3     | p.H339N                          |
| PCDH12              | 5 | 141315208 | 141315208 | Missense     | SNP | A   | G | BRC8    | NM_016580.2     | p.V798A                          |
| PCDH12              | 5 | 141315495 | 141315495 | Silent       | SNP | C   | G | BRC39   | NM_016580.2     | p.L702                           |
| PCDH12              | 5 | 141316192 | 141316192 | Missense     | SNP | C   | T | CSB15   | NM_016580.2     | p.R470Q                          |
| KCTD16              | 5 | 143833704 | 143833704 | Missense     | SNP | G   | A | BRC6    | NM_020768.3     | p.R374K                          |
| KCTD16              | 5 | 143833731 | 143833731 | Missense     | SNP | A   | C | CSB22   | NM_020768.3     | p.K383T                          |
| RBM27               | 5 | 145589610 | 145589610 | Missense     | SNP | G   | A | CSB21   | ENST00000265271 | p.R178H                          |
| TCERG1              | 5 | 145842436 | 145842436 | Missense     | SNP | C   | G | CSB1    | NM_006706.1     | p.L659V                          |
| ENSG0000022327<br>0 | 5 | 146016436 | 146016436 | RNA          | SNP | G   | T | BRC47   | ENST00000411338 | NULL                             |
| LOC153469           | 5 | 146955213 | 146955213 | Missense     | SNP | C   | T | BRC3    | XM_001724056.1  | p.R86C                           |
| SCGB3A2             | 5 | 147238586 | 147238586 | Silent       | SNP | G   | A | CSB1    | NM_054023.3     | p.L9                             |
| FBXO38              | 5 | 147775778 | 147775778 | Silent       | SNP | C   | A | CSB1    | NM_205836.3     | p.P453                           |
| FLJ41603            | 5 | 148983800 | 148983800 | Missense     | SNP | C   | G | CSB1    | NM_001001669.2  | p.F456L                          |

|            |   |           |           |                         |     |   |     |       |                 |          |
|------------|---|-----------|-----------|-------------------------|-----|---|-----|-------|-----------------|----------|
| PDE6A      | 5 | 149304114 | 149304114 | Missense                | SNP | C | T   | BRC18 | NM_000440.2     | p.A106T  |
| CSF1R      | 5 | 149417278 | 149417278 | Missense                | SNP | C | G   | BRC13 | NM_005211.3     | p.D735H  |
| CAMK2A     | 5 | 149649345 | 149649345 | Missense                | SNP | A | G   | BRC33 | NM_015981.3     | p.Y13H   |
| TCOF1      | 5 | 149739395 | 149739395 | Silent                  | SNP | G | A   | BRC20 | NM_001008656.3  | p.S922   |
| TNIP1      | 5 | 150409623 | 150409623 | Silent                  | SNP | C | T   | BRC47 | NM_006058.3     | p.P267   |
| CCDC69     | 5 | 150544141 | 150544141 | Missense                | SNP | C | T   | CSB1  | NM_015621.2     | p.E224K  |
| FAT2       | 5 | 150865463 | 150865463 | Silent                  | SNP | G | A   | BRC11 | NM_001447.2     | p.L4302  |
| FAT2       | 5 | 150865737 | 150865737 | Nonsense                | SNP | G | C   | BRC5  | NM_001447.2     | p.S4211* |
| LARP1      | 5 | 154165686 | 154165686 | Nonsense                | SNP | C | T   | BRC31 | NM_033551.3     | p.Q867*  |
| CNOT8      | 5 | 154223121 | 154223121 | Silent                  | SNP | C | T   | BRC7  | NM_004779.4     | p.I30    |
| CNOT8      | 5 | 154230469 | 154230469 | Missense                | SNP | T | C   | BRC31 | NM_004779.4     | p.F123L  |
| FAM71B     | 5 | 156522587 | 156522587 | Missense                | SNP | C | T   | BRC50 | NM_130899.2     | p.E423K  |
| EBF1       | 5 | 158067597 | 158067597 | Missense                | SNP | G | A   | BRC35 | NM_024007.3     | p.T571I  |
| HMMR       | 5 | 162833754 | 162833754 | Missense                | SNP | G | C   | BRC47 | NM_012484.1     | p.E339Q  |
| ODZ2       | 5 | 167550031 | 167550031 | Missense                | SNP | C | T   | BRC32 | ENST00000388903 | p.T894M  |
| SLIT3      | 5 | 168176979 | 168176979 | Nonsense                | SNP | G | A   | CSB22 | NM_003062.2     | p.R233*  |
| LOC728095  | 5 | 168372862 | 168372862 | RNA                     | SNP | C | T   | BRC22 | XR_040697.1     | NULL     |
| uc003mag.2 | 5 | 169223919 | 169223919 | Missense                | SNP | G | A   | CSB14 | ENST00000377365 | p.P515L  |
| uc003mag.2 | 5 | 169242207 | 169242207 | Missense                | SNP | G | C   | BRC39 | ENST00000377365 | p.S425W  |
| LCP2       | 5 | 169620719 | 169620719 | Missense<br>Frame Shift | SNP | C | A   | CSB2  | NM_005565.3     | p.K309N  |
| RANBP17    | 5 | 170542787 | 170542787 | Ins                     | INS |   | 0 A | CSB22 | NM_022897.2     | p.L629fs |
| RANBP17    | 5 | 170600671 | 170600671 | Silent                  | SNP | T | C   | BRC18 | NM_022897.2     | p.L853   |
| DUSP1      | 5 | 172129202 | 172129202 | Missense                | SNP | C | T   | BRC50 | NM_004417.2     | p.E239K  |
| BNIP1      | 5 | 172523474 | 172523474 | Missense                | SNP | C | G   | BRC31 | NM_013979.2     | p.L254V  |
| PCDH24     | 5 | 175955269 | 175955269 | Missense                | SNP | C | T   | CSB9  | NM_017675.3     | p.T1308M |
| HK3        | 5 | 176241618 | 176241618 | Missense                | SNP | G | C   | BRC11 | NM_002115.2     | p.L724V  |
| NSD1       | 5 | 176571787 | 176571787 | Missense                | SNP | G | A   | CSB1  | NM_022455.4     | p.E1261K |
| RGS14      | 5 | 176728353 | 176728353 | Missense                | SNP | G | C   | CSB12 | NM_006480.4     | p.E293D  |
| DOK3       | 5 | 176864698 | 176864698 | Missense                | SNP | G | A   | BRC39 | NM_024872.1     | p.S187L  |
| HNRNPAB    | 5 | 177570185 | 177570185 | Missense                | SNP | G | C   | BRC13 | NM_031266.3     | p.K318N  |
| GRM6       | 5 | 178342800 | 178342800 | Missense                | SNP | G | A   | CSB22 | NM_000843.3     | p.A718V  |
| CNOT6      | 5 | 179927585 | 179927585 | Missense                | SNP | C | T   | CSB34 | NM_015455.3     | p.R335W  |
| BTNL9      | 5 | 180409739 | 180409739 | Missense                | SNP | G | A   | CSB1  | NM_152547.4     | p.G167E  |
| TRIM41     | 5 | 180583964 | 180583964 | Missense                | SNP | T | A   | CSB16 | NM_033549.3     | p.M120K  |



|              |   |          |          |                    |     |       |   |       |                 |          |
|--------------|---|----------|----------|--------------------|-----|-------|---|-------|-----------------|----------|
| RIPK1        | 6 | 3051066  | 3051066  | Missense           | SNP | C     | T | BRC31 | NM_003804.3     | p.S453L  |
| F13A1        | 6 | 6211938  | 6211942  | Del<br>Frame Shift | DEL | CCTGT | 0 | BRC41 | NM_000129.3     | p.D140fs |
| RREB1        | 6 | 7156887  | 7156887  | Del                | DEL | T     | 0 | CSB23 | NM_001003699.2  | p.C219fs |
| RREB1        | 6 | 7156926  | 7156926  | Nonsense           | SNP | C     | G | BRC47 | NM_001003699.2  | p.S231*  |
| SSR1         | 6 | 7248841  | 7248841  | Missense           | SNP | G     | A | CSB1  | NM_003144.3     | p.S74F   |
| CAGE1        | 6 | 7301341  | 7301341  | Silent             | SNP | G     | T | BRC50 | ENST00000379918 | p.L746   |
| DSP          | 6 | 7528796  | 7528796  | Missense           | SNP | C     | T | BRC39 | NM_004415.1     | p.S2101L |
| TXNDC5       | 6 | 7833983  | 7833983  | Missense           | SNP | G     | A | CSB16 | NM_030810.1     | p.T306M  |
| GCNT6        | 6 | 10742884 | 10742884 | Silent             | SNP | C     | T | BRC39 | XM_927529.1     | p.F314   |
| NHLRC1       | 6 | 18230765 | 18230765 | Missense           | SNP | C     | G | BRC11 | NM_198586.2     | p.E18Q   |
| NRSN1        | 6 | 24249354 | 24249354 | Missense           | SNP | G     | A | BRC39 | ENST00000378475 | p.R138Q  |
| LOC100129474 | 6 | 25840270 | 25840270 | Missense           | SNP | C     | T | BRC40 | XM_001717559.1  | p.A132V  |
| HIST1H1E     | 6 | 26265164 | 26265164 | Silent             | SNP | G     | A | BRC18 | NM_005321.2     | p.A189   |
| HIST1H2BD    | 6 | 26266387 | 26266387 | Missense           | SNP | C     | A | BRC41 | NM_021063.2     | p.P4H    |
| HIST1H2BE    | 6 | 26292287 | 26292287 | Missense           | SNP | C     | G | CSB8  | NM_003523.2     | p.I95M   |
| HIST1H2BF    | 6 | 26307970 | 26307970 | Missense           | SNP | G     | A | CSB1  | NM_003522.3     | p.D69N   |
| HIST1H2BG    | 6 | 26324779 | 26324779 | Missense           | SNP | C     | G | BRC39 | NM_003518.3     | p.K24N   |
| HIST1H1D     | 6 | 26342993 | 26342993 | Missense           | SNP | C     | A | CSB29 | NM_005320.2     | p.A50S   |
| LOC100132361 | 6 | 26430313 | 26430313 | Silent             | SNP | C     | T | BRC34 | XM_001717606.1  | p.S54    |
| BTN3A1       | 6 | 26514140 | 26514140 | Missense           | SNP | C     | T | CSB1  | NM_007048.1     | p.S37F   |
| POM121L2     | 6 | 27385344 | 27385344 | Missense           | SNP | G     | T | CSB29 | ENST00000377451 | p.T798K  |
| ZNF184       | 6 | 27528701 | 27528701 | Missense           | SNP | T     | C | BRC3  | NM_007149.2     | p.K206E  |
| HIST1H2AI    | 6 | 27884174 | 27884174 | Missense           | SNP | G     | A | CSB23 | NM_003509.2     | p.A70T   |
| OR2B6        | 6 | 28033691 | 28033691 | Missense           | SNP | G     | A | BRC30 | NM_012367.1     | p.E232K  |
| NKAPL        | 6 | 28335372 | 28335372 | Missense           | SNP | G     | A | CSB31 | NM_001007531.1  | p.A82T   |
| OR10C1       | 6 | 29516587 | 29516587 | Silent             | SNP | G     | T | BRC29 | NM_013941.2     | p.L272   |
| PPP1R10      | 6 | 30679372 | 30679372 | Silent             | SNP | C     | T | BRC9  | NM_002714.2     | p.G541   |
| DDR1         | 6 | 30974660 | 30974660 | Missense           | SNP | C     | T | BRC20 | NM_013994.4     | p.A829V  |
| DPCR1        | 6 | 31027816 | 31027816 | Missense           | SNP | G     | A | BRC24 | NM_080870.2     | p.G41E   |
| LOC729792    | 6 | 31105298 | 31105298 | Missense           | SNP | G     | A | BRC39 | XM_001131329.1  | p.E1119K |
| CCHCR1       | 6 | 31224237 | 31224237 | Nonsense           | SNP | C     | A | BRC39 | NM_001105564.1  | p.E502*  |
| CCHCR1       | 6 | 31226507 | 31226507 | Nonsense           | SNP | G     | A | BRC9  | NM_001105564.1  | p.R359*  |
| POU5F1       | 6 | 31240988 | 31240988 | Missense           | SNP | C     | T | BRC36 | NM_002701.4     | p.E238K  |
| AIF1         | 6 | 31691982 | 31691982 | Missense           | SNP | C     | T | BRC39 | ENST00000376051 | p.H39Y   |



|              |   |          |          |             |     |   |   |       |                |          |
|--------------|---|----------|----------|-------------|-----|---|---|-------|----------------|----------|
| BAT4         | 6 | 31739678 | 31739678 | Missense    | SNP | T | G | BRC51 | NM_033177.2    | p.E186A  |
| VARS         | 6 | 31855820 | 31855820 | Silent      | SNP | G | A | BRC35 | NM_006295.2    | p.Y1005  |
| EGFL8        | 6 | 32241962 | 32241962 | Missense    | SNP | C | G | CSB1  | NM_030652.2    | p.F14L   |
| PSMB8        | 6 | 32920125 | 32920125 | Missense    | SNP | G | A | CSB9  | NM_004159.4    | p.S15F   |
| BRD2         | 6 | 33053911 | 33053911 | Missense    | SNP | C | G | BRC31 | NM_005104.1    | p.L537V  |
| COL11A2      | 6 | 33264187 | 33264187 | Missense    | SNP | G | A | BRC18 | NM_080680.2    | p.A179V  |
| RGL2         | 6 | 33372200 | 33372200 | Missense    | SNP | G | A | CSB1  | NM_004761.2    | p.H147Y  |
| TAPBP        | 6 | 33380284 | 33380284 | Silent      | SNP | C | T | BRC4  | NM_003190.3    | p.L326   |
| ITPR3        | 6 | 33740721 | 33740721 | Silent      | SNP | C | G | CSB1  | NM_002224.2    | p.L415   |
| HMGA1        | 6 | 34316646 | 34316646 | Silent      | SNP | C | T | CSB19 | NM_145899.3    | p.P37    |
| TAF11        | 6 | 34963619 | 34963619 | Missense    | SNP | C | G | BRC7  | NM_005643.2    | p.D32H   |
| TCP11        | 6 | 35194234 | 35194234 | Silent      | SNP | G | C | CSB1  | NM_001093728.1 | p.L447   |
| SCUBE3       | 6 | 35320404 | 35320404 | Splice_Site | SNP | G | C | CSB5  | NM_152753.2    | e18-1    |
| SRPK1        | 6 | 35946136 | 35946136 | Silent      | SNP | G | T | CSB10 | NM_003137.3    | p.G297   |
| LOC100131043 | 6 | 36831425 | 36831425 | Missense    | SNP | G | C | BRC51 | XM_001725057.1 | p.R149G  |
| PPIL1        | 6 | 36931614 | 36931614 | Missense    | SNP | G | A | BRC22 | NM_016059.4    | p.R152C  |
| DNAH8        | 6 | 38878968 | 38878968 | Missense    | SNP | C | A | CSB3  | NM_001371.2    | p.H762Q  |
| DNAH8        | 6 | 38918574 | 38918574 | Missense    | SNP | A | G | CSB6  | NM_001371.2    | p.T1371A |
| GLP1R        | 6 | 39148739 | 39148739 | Silent      | SNP | G | A | BRC52 | NM_002062.3    | p.Q211   |
| DAAM2        | 6 | 39936772 | 39936772 | Splice_Site | SNP | G | T | CSB27 | NM_015345.2    | e2+1     |
| USP49        | 6 | 41881700 | 41881700 | Missense    | SNP | C | T | CSB13 | NM_018561.3    | p.G334S  |
| TRERF1       | 6 | 42332502 | 42332502 | Missense    | SNP | C | T | CSB1  | NM_033502.2    | p.G841E  |
| C6orf153     | 6 | 43104932 | 43104932 | Missense    | SNP | G | C | BRC39 | NM_033112.2    | p.L256F  |
| CUL7         | 6 | 43113599 | 43113599 | Silent      | SNP | C | T | CSB1  | NM_014780.3    | p.L1634  |
| CUL7         | 6 | 43128103 | 43128103 | Silent      | SNP | A | G | BRC32 | NM_014780.3    | p.P134   |
| PTK7         | 6 | 43220217 | 43220217 | Missense    | SNP | G | T | CSB28 | NM_002821.3    | p.A768S  |
| CUL9         | 6 | 43274517 | 43274517 | Missense    | SNP | T | G | BRC5  | NM_015089.2    | p.L999R  |
| CUL9         | 6 | 43289624 | 43289624 | Missense    | SNP | G | C | CSB2  | NM_015089.2    | p.C1895S |
| ZNF318       | 6 | 43431363 | 43431363 | Missense    | SNP | T | A | BRC5  | NM_014345.2    | p.M563L  |
| CAPN11       | 6 | 44249089 | 44249089 | Silent      | SNP | T | C | BRC47 | NM_007058.3    | p.G236   |
| CAPN11       | 6 | 44255679 | 44255679 | Nonsense    | SNP | C | T | CSB1  | NM_007058.3    | p.Q444*  |
| SLC29A1      | 6 | 44308564 | 44308564 | Missense    | SNP | C | T | BRC9  | NM_001078174.1 | p.R368W  |
| SPATS1       | 6 | 44452082 | 44452082 | Missense    | SNP | C | G | BRC39 | NM_145026.2    | p.F256L  |
| TDRD6        | 6 | 46769663 | 46769663 | Missense    | SNP | G | C | CSB2  | NM_001010870.1 | p.E1947Q |
| GPR115       | 6 | 47790293 | 47790293 | Silent      | SNP | G | T | CSB6  | NM_153838.3    | p.L451   |

|              |   |          |          |             |     |         |   |       |                 |          |
|--------------|---|----------|----------|-------------|-----|---------|---|-------|-----------------|----------|
| GPR115       | 6 | 47792529 | 47792529 | Missense    | SNP | T       | C | CSB2  | NM_153838.3     | p.I654T  |
| OPN5         | 6 | 47871047 | 47871047 | Missense    | SNP | C       | T | BRC31 | NM_181744.1     | p.S182L  |
| RPS17P5      | 6 | 50933069 | 50933069 | Missense    | SNP | G       | A | CSB1  | ENST00000331146 | p.S89L   |
| PKHD1        | 6 | 51879039 | 51879039 | Silent      | SNP | G       | A | CSB10 | NM_138694.3     | p.C2247  |
| PAQR8        | 6 | 52376495 | 52376495 | Silent      | SNP | C       | T | CSB1  | NM_133367.4     | p.F175   |
| GSTA5        | 6 | 52806987 | 52806987 | Missense    | SNP | G       | C | BRC41 | NM_153699.1     | p.L109V  |
| FBXO9        | 6 | 53053741 | 53053741 | Missense    | SNP | G       | T | BRC29 | ENST00000244426 | p.D152Y  |
| DST          | 6 | 56465038 | 56465038 | Silent      | SNP | T       | C | BRC21 | NM_183380.1     | p.Q460A  |
| DST          | 6 | 56490044 | 56490044 | Missense    | SNP | A       | T | BRC37 | NM_183380.1     | p.L3793M |
| DST          | 6 | 56589710 | 56589710 | Missense    | SNP | C       | T | BRC39 | NM_001723.1     | p.E2172K |
| DST          | 6 | 56591259 | 56591259 | Missense    | SNP | G       | T | CSB1  | NM_001723.1     | p.N1844K |
| DST          | 6 | 56623892 | 56623892 | Missense    | SNP | C       | T | BRC50 | NM_183380.1     | p.E231K  |
| BEND6        | 6 | 56987941 | 56987941 | Missense    | SNP | C       | T | BRC32 | NM_152731.2     | p.A117V  |
| LOC100132588 | 6 | 58378242 | 58378242 | Missense    | SNP | C       | G | BRC47 | XM_001714205.1  | p.R106T  |
| COL19A1      | 6 | 70694520 | 70694520 | Splice_Site | SNP | A       | G | CSB19 | NM_001858.4     | e4-2     |
| COL9A1       | 6 | 71020950 | 71020950 | Nonsense    | SNP | C       | A | BRC5  | NM_001851.4     | p.E557*  |
| FAM135A      | 6 | 71247323 | 71247323 | Splice_Site | SNP | A       | C | BRC20 | NM_001105531.1  | e6-2     |
| C6orf57      | 6 | 71333369 | 71333369 | Missense    | SNP | C       | G | CSB24 | NM_145267.2     | p.T2S    |
| SMAP1        | 6 | 71521403 | 71521403 | Splice_Site | SNP | G       | C | CSB33 | NM_001044305.1  | e3-1     |
| RIMS1        | 6 | 73100037 | 73100037 | Missense    | SNP | A       | C | BRC42 | NM_014989.3     | p.K1382Q |
| COL12A1      | 6 | 75855574 | 75855574 | Missense    | SNP | G       | A | BRC39 | NM_004370.5     | p.S2993F |
| COL12A1      | 6 | 75880167 | 75880167 | Missense    | SNP | T       | G | BRC13 | NM_004370.5     | p.N2571H |
| TMEM30A      | 6 | 76022712 | 76022712 | Missense    | SNP | A       | T | BRC6  | NM_018247.1     | p.F304L  |
| ELOVL4       | 6 | 80688233 | 80688233 | Splice_Site | SNP | C       | G | BRC39 | NM_022726.3     | e4-1     |
| ME1          | 6 | 84112734 | 84112734 | Missense    | SNP | C       | G | CSB1  | NM_002395.3     | p.L159F  |
| KIAA1009     | 6 | 84952925 | 84952925 | Silent      | SNP | T       | C | BRC15 | NM_014895.2     | p.L415   |
| LOC643926    | 6 | 87198690 | 87198690 | Nonsense    | SNP | A       | T | BRC34 | XM_927187.1     | p.K3*    |
| CGA          | 6 | 87854608 | 87854608 | Missense    | SNP | G       | C | CSB1  | NM_000735.2     | p.I10M   |
| ZNF292       | 6 | 88022203 | 88022203 | Missense    | SNP | C       | T | BRC32 | NM_015021.1     | p.R713C  |
| ZNF292       | 6 | 88027946 | 88027946 | Nonsense    | SNP | C       | G | BRC47 | NM_015021.1     | p.S2627* |
| MDN1         | 6 | 90416487 | 90416487 | Missense    | SNP | T       | A | CSB21 | NM_014611.1     | p.M5395L |
| EPHA7        | 6 | 94009970 | 94009970 | Missense    | SNP | C       | G | BRC20 | NM_004440.3     | p.M964I  |
| KIAA0776     | 6 | 97102828 | 97102828 | Missense    | SNP | A       | G | BRC26 | NM_015323.4     | p.I490M  |
| FBXL4        | 6 | 99428959 | 99428959 | Missense    | SNP | G       | C | CSB1  | NM_012160.3     | p.F594L  |
| SFRS18       | 6 | 99965552 | 99965579 | Frame Shift | DEL | ATTCCCC | 0 | CSB34 | NM_015491.1     | p.E93fs  |

|          |   |           |           |                                |     | Del            | AT<br>TCTATTT<br>AAG<br>ATTTAGG<br>CA |         |                |  |          |  |
|----------|---|-----------|-----------|--------------------------------|-----|----------------|---------------------------------------|---------|----------------|--|----------|--|
| SIM1     | 6 | 101003156 | 101003156 | Silent                         | SNP | G              | A                                     | CSB20   | NM_005068.2    |  | p.A221   |  |
| HACE1    | 6 | 105387699 | 105387699 | Missense                       | SNP | C              | T                                     | BRC39   | NM_020771.3    |  | p.D149N  |  |
| PRDM1    | 6 | 106660148 | 106660148 | Missense                       | SNP | G              | A                                     | BRC18   | NM_001198.3    |  | p.G438R  |  |
| PRDM1    | 6 | 106660498 | 106660498 | Silent                         | SNP | G              | A                                     | BRC18   | NM_001198.3    |  | p.L554   |  |
| BEND3    | 6 | 107496832 | 107496832 | Silent                         | SNP | G              | A                                     | BRC11   | NM_001080450.1 |  | p.F752   |  |
| BEND3    | 6 | 107496938 | 107496938 | Missense                       | SNP | G              | A                                     | BRC11   | NM_001080450.1 |  | p.S717F  |  |
| CDC40    | 6 | 110640983 | 110640983 | Missense                       | SNP | G              | A                                     | BRC30   | NM_015891.2    |  | p.G290D  |  |
| TRAF3IP2 | 6 | 112019923 | 112019923 | Silent                         | SNP | C              | T                                     | BRC13   | NM_147200.1    |  | p.L29    |  |
| TSPYL1   | 6 | 116707110 | 116707110 | Missense                       | SNP | C              | T                                     | CSB1    | NM_003309.2    |  | p.E193K  |  |
| ZUFSP    | 6 | 117094935 | 117094935 | Silent                         | SNP | A              | T                                     | BRC3    | NM_145062.1    |  | p.G38    |  |
| GPRC6A   | 6 | 117234474 | 117234474 | Missense                       | SNP | C              | A                                     | BRC41   | NM_148963.2    |  | p.A363S  |  |
| C6orf204 | 6 | 118909715 | 118909715 | Missense                       | SNP | G              | C                                     | BRC39   | NM_001042475.1 |  | p.I555M  |  |
| MAN1A1   | 6 | 119556652 | 119556652 | Missense                       | SNP | C              | G                                     | BRC39   | NM_005907.2    |  | p.D439H  |  |
| MAN1A1   | 6 | 119711492 | 119711492 | Silent                         | SNP | G              | A                                     | CSB1    | NM_005907.2    |  | p.I146   |  |
| C6orf170 | 6 | 121494537 | 121494537 | Missense                       | SNP | A              | G                                     | BRC33   | NM_152730.4    |  | p.I945T  |  |
| KIAA0408 | 6 | 127810509 | 127810509 | Silent                         | SNP | G              | T                                     | BRC11   | NM_014702.3    |  | p.I216   |  |
| LAMA2    | 6 | 129712147 | 129712147 | Missense                       | SNP | C              | G                                     | CSB1    | NM_000426.3    |  | p.S1483C |  |
| EPB41L2  | 6 | 131253263 | 131253263 | Missense                       | SNP | G              | C                                     | BRC18   | NM_001431.1    |  | p.F508L  |  |
| MED23    | 6 | 131956964 | 131956964 | Missense                       | SNP | T              | C                                     | CSB34   | NM_004830.2    |  | p.Y1067C |  |
| MED23    | 6 | 131972919 | 131972919 | Missense                       | SNP | A              | G                                     | CSB20   | NM_004830.2    |  | p.F346S  |  |
| TAAR1    | 6 | 133008478 | 133008478 | Missense                       | SNP | C              | G                                     | CSB1    | NM_138327.1    |  | p.D120H  |  |
| SLC2A12  | 6 | 134369725 | 134369725 | Silent                         | SNP | G              | A                                     | BRC39   | NM_145176.2    |  | p.I495   |  |
| SLC2A12  | 6 | 134392467 | 134392467 | Silent                         | SNP | C              | T                                     | CSB5    | NM_145176.2    |  | p.G63    |  |
| MAP7     | 6 | 136728718 | 136728718 | Missense                       | SNP | C              | T                                     | BRC15   | NM_003980.3    |  | p.R374K  |  |
| MAP3K5   | 6 | 137005362 | 137005362 | Silent                         | SNP | G              | A                                     | BRC22   | NM_005923.3    |  | p.V609   |  |
| GPR126   | 6 | 142774215 | 142774215 | Missense                       | SNP | C              | A                                     | BRC11   | NM_198569.2    |  | p.H839N  |  |
| HIVEP2   | 6 | 143116672 | 143116672 | Silent                         | SNP | G              | A                                     | BRC47   | NM_006734.3    |  | p.F2202  |  |
| HIVEP2   | 6 | 143123249 | 143123249 | Missense                       | SNP | C              | A                                     | BRC41   | NM_006734.3    |  | p.V1957F |  |
| HIVEP2   | 6 | 143135403 | 143135412 | Missense<br>Frame Shift<br>Del | DEL | GCCCAC<br>AGGA |                                       | 0 BRC14 | NM_006734.3    |  | p.P720fs |  |
| PEX3     | 6 | 143841907 | 143841907 | Missense                       | SNP | C              | T                                     | BRC18   | NM_003630.2    |  | p.P274S  |  |
| FAM164B  | 6 | 144261507 | 144261507 | Missense                       | SNP | G              | A                                     | CSB34   | XM_928657.2    |  | p.A159T  |  |

|            |   |           |           |              |     |        |   |       |                 |                                  |
|------------|---|-----------|-----------|--------------|-----|--------|---|-------|-----------------|----------------------------------|
| STX11      | 6 | 144550103 | 144550103 | Missense     | SNP | C      | T | BRC17 | NM_003764.3     | p.R216C                          |
| GRM1       | 6 | 146392952 | 146392952 | Silent       | SNP | G      | A | CSB1  | NM_000838.3     | p.L202                           |
| MAP3K7IP2  | 6 | 149742141 | 149742141 | Missense     | SNP | T      | C | BRC35 | NM_015093.3     | p.I466T                          |
| SYNE1      | 6 | 152574344 | 152574344 | Missense     | SNP | C      | G | BRC13 | NM_182961.2     | p.E7523Q                         |
| SYNE1      | 6 | 152692997 | 152692997 | Missense     | SNP | A      | G | BRC5  | NM_182961.2     | p.L4839P                         |
| SYNE1      | 6 | 152750043 | 152750043 | Missense     | SNP | C      | T | BRC18 | NM_182961.2     | p.E2782K                         |
| SYNE1      | 6 | 152754153 | 152754153 | Missense     | SNP | G      | T | BRC14 | NM_182961.2     | p.S2652R                         |
| SYNE1      | 6 | 152791155 | 152791155 | Missense     | SNP | C      | G | BRC24 | NM_182961.2     | p.K1618N                         |
| SYNE1      | 6 | 152851280 | 152851280 | Missense     | SNP | C      | G | BRC11 | NM_182961.2     | p.E331Q                          |
| FBXO5      | 6 | 153337916 | 153337916 | Missense     | SNP | G      | A | CSB1  | NM_012177.1     | p.P213S                          |
| LOC729436  | 6 | 155324026 | 155324026 | Nonsense     | SNP | C      | G | BRC9  | XM_001133246.1  | p.S101*                          |
| TULP4      | 6 | 158655230 | 158655230 | Missense     | SNP | G      | T | BRC16 | NM_020245.1     | p.R65L<br>p.RS168in<br>Frame del |
| SYTL3      | 6 | 159049392 | 159049397 | In Frame Del | DEL | GCAGCC | 0 | CSB2  | NM_001009991.2  |                                  |
| FNDC1      | 6 | 159538515 | 159538515 | Silent       | SNP | G      | A | BRC4  | NM_032532.2     | p.T58                            |
| IGF2R      | 6 | 160370658 | 160370658 | Missense     | SNP | G      | A | BRC38 | NM_000876.2     | p.C288Y                          |
| MAP3K4     | 6 | 161450922 | 161450922 | Missense     | SNP | A      | G | BRC14 | NM_005922.2     | p.H1461R                         |
| PDE10A     | 6 | 165672811 | 165672811 | Silent       | SNP | T      | A | CSB6  | NM_006661.1     | p.I698                           |
| TLL2       | 6 | 167674941 | 167674941 | Silent       | SNP | C      | G | BRC31 | NM_031949.4     | p.L521                           |
| TCTE3      | 6 | 169886137 | 169886137 | Missense     | SNP | C      | G | BRC39 | NM_174910.1     | p.K93N                           |
| DLL1       | 6 | 170439325 | 170439325 | Silent       | SNP | G      | A | CSB15 | NM_005618.3     | p.F199                           |
| FAM120B    | 6 | 170468721 | 170468721 | Silent       | SNP | C      | G | BRC39 | NM_032448.1     | p.L106                           |
| C7orf20    | 7 | 892250    | 892250    | Missense     | SNP | C      | T | CSB20 | NM_015949.2     | p.R63W                           |
| INTS1      | 7 | 1492834   | 1492834   | Missense     | SNP | G      | A | CSB22 | NM_001080453.2  | p.R1107W                         |
| uc003slc.1 | 7 | 1699783   | 1699783   | Missense     | SNP | C      | T | BRC11 | ENST00000382528 | p.R92Q                           |
| C7orf27    | 7 | 2549426   | 2549426   | Silent       | SNP | C      | T | BRC47 | NM_152743.2     | p.L287                           |
| TNRC18     | 7 | 5315430   | 5315430   | Silent       | SNP | G      | C | BRC31 | NM_001080495.2  | p.L1547                          |
| COL28A1    | 7 | 7364908   | 7364908   | Nonsense     | SNP | G      | A | BRC39 | NM_001037763.2  | p.R1087*                         |
| COL28A1    | 7 | 7379637   | 7379637   | Missense     | SNP | C      | T | CSB14 | NM_001037763.2  | p.V809M                          |
| COL28A1    | 7 | 7459623   | 7459623   | Silent       | SNP | G      | A | CSB16 | NM_001037763.2  | p.P471                           |
| MIOS       | 7 | 7579155   | 7579155   | Missense     | SNP | C      | T | CSB13 | NM_019005.3     | p.T175I                          |
| GLCC11     | 7 | 8092591   | 8092591   | Silent       | SNP | C      | T | CSB1  | NM_138426.2     | p.G514                           |
| ETV1       | 7 | 13906928  | 13906928  | Missense     | SNP | C      | T | CSB29 | ENST00000405358 | p.R405H                          |
| ANKMY2     | 7 | 16633306  | 16633306  | Missense     | SNP | T      | C | BRC19 | NM_020319.1     | p.H52R                           |
| BZW2       | 7 | 16710795  | 16710795  | Missense     | SNP | G      | C | CSB22 | NM_014038.1     | p.E403Q                          |

|              |   |          |          |                         |     |   |   |         |                 |          |
|--------------|---|----------|----------|-------------------------|-----|---|---|---------|-----------------|----------|
| HDAC9        | 7 | 18635583 | 18635583 | Silent                  | SNP | T | C | CSB1    | NM_178425.1     | p.D250   |
| MACC1        | 7 | 20166046 | 20166046 | Nonsense                | SNP | G | A | CSB1    | NM_182762.3     | p.Q155*  |
| ITGB8        | 7 | 20385315 | 20385315 | Missense                | SNP | G | A | BRC3    | NM_002214.2     | p.V169I  |
| ABCB5        | 7 | 20651923 | 20651923 | Missense                | SNP | G | C | CSB31   | ENST00000404938 | p.S233T  |
| DNAH11       | 7 | 21549515 | 21549515 | Missense                | SNP | G | A | CSB1    | ENST00000328843 | p.E43K   |
| DNAH11       | 7 | 21607002 | 21607002 | Missense                | SNP | G | A | CSB1    | ENST00000328843 | p.D1062N |
| DNAH11       | 7 | 21741813 | 21741813 | Missense                | SNP | C | T | CSB1    | ENST00000328843 | p.R2498C |
| DNAH11       | 7 | 21900928 | 21900928 | Missense                | SNP | C | A | BRC33   | ENST00000328843 | p.Q4312K |
| KLHL7        | 7 | 23129984 | 23129984 | Missense                | SNP | C | T | BRC47   | NM_001031710.2  | p.L62F   |
| KLHL7        | 7 | 23146938 | 23146938 | Silent                  | SNP | A | G | CSB22   | NM_001031710.2  | p.L156   |
| KIAA0087     | 7 | 26542937 | 26542937 | Missense                | SNP | G | A | BRC31   | ENST00000242109 | p.T126I  |
| uc003syb.1   | 7 | 26645308 | 26645308 | Missense<br>Frame Shift | SNP | C | G | BRC52   | ENST00000409974 | p.A7G    |
| HOXA2        | 7 | 27107604 | 27107604 | Del                     | DEL | G |   | 0 BRC31 | NM_006735.3     | p.L133fs |
| EVX1         | 7 | 27252565 | 27252565 | Missense                | SNP | G | C | BRC7    | NM_001989.3     | p.R407T  |
| CREB5        | 7 | 28730371 | 28730371 | Missense                | SNP | G | A | CSB9    | NM_182898.1     | p.R200Q  |
| CREB5        | 7 | 28730475 | 28730475 | Splice_Site             | SNP | G | T | BRC10   | NM_182898.1     | e7+1     |
| CPVL         | 7 | 29098777 | 29098777 | Missense                | SNP | G | A | BRC21   | NM_019029.2     | p.R177W  |
| CPVL         | 7 | 29098829 | 29098829 | Missense                | SNP | G | T | CSB1    | NM_019029.2     | p.F159L  |
| C7orf16      | 7 | 31701700 | 31701700 | Missense                | SNP | G | A | CSB10   | NM_006658.1     | p.D59N   |
| KBTBD2       | 7 | 32875867 | 32875867 | Missense                | SNP | G | A | CSB1    | NM_015483.2     | p.S496L  |
| KBTBD2       | 7 | 32876299 | 32876299 | Nonsense                | SNP | C | T | BRC3    | NM_015483.2     | p.W352*  |
| NT5C3        | 7 | 33023699 | 33023699 | Silent                  | SNP | A | G | BRC42   | NM_001002010.1  | p.H195   |
| EEPD1        | 7 | 36303312 | 36303312 | Missense                | SNP | G | T | BRC41   | NM_030636.2     | p.V501F  |
| ANLN         | 7 | 36412386 | 36412386 | Missense                | SNP | C | G | BRC39   | NM_018685.2     | p.L187V  |
| TXNDC3       | 7 | 37856842 | 37856842 | Missense                | SNP | G | A | BRC13   | NM_016616.3     | p.E60K   |
| TXNDC3       | 7 | 37873946 | 37873946 | Missense                | SNP | G | A | BRC29   | NM_016616.3     | p.E247K  |
| INHBA        | 7 | 41706374 | 41706374 | Missense                | SNP | C | T | BRC5    | NM_002192.2     | p.A42T   |
| GLI3         | 7 | 42054731 | 42054731 | Missense                | SNP | G | A | CSB1    | NM_000168.5     | p.S188F  |
| URG4         | 7 | 43883996 | 43883996 | Missense                | SNP | G | A | CSB21   | NM_001077663.1  | p.R531W  |
| GCK          | 7 | 44153777 | 44153777 | Missense                | SNP | T | A | CSB8    | NM_033507.3     | p.Q288L  |
| NPC1L1       | 7 | 44545366 | 44545366 | Silent                  | SNP | G | A | CSB9    | NM_013389.1     | p.A385   |
| NPC1L1       | 7 | 44546100 | 44546100 | Missense                | SNP | G | A | CSB19   | NM_013389.1     | p.R141C  |
| DDX56        | 7 | 44579789 | 44579789 | Missense                | SNP | A | C | BRC29   | NM_019082.2     | p.L47R   |
| LOC100128364 | 7 | 45084616 | 45084616 | Missense                | SNP | C | T | BRC26   | XM_001725500.1  | p.R429H  |

|                     |   |          |          |                         |     |   |   |         |                 |          |
|---------------------|---|----------|----------|-------------------------|-----|---|---|---------|-----------------|----------|
| PKD1L1              | 7 | 47891927 | 47891927 | Silent                  | SNP | C | T | CSB25   | NM_138295.2     | p.G1029  |
| LOC100130988        | 7 | 50146259 | 50146259 | Missense                | SNP | A | T | BRC44   | XM_001713888.1  | p.D256V  |
| COBL                | 7 | 51060527 | 51060527 | Nonsense<br>Frame Shift | SNP | G | A | BRC8    | NM_015198.3     | p.R1181* |
| ECOP                | 7 | 55527564 | 55527564 | Del                     | DEL | C |   | 0 CSB7  | NM_030796.3     | p.G78fs  |
| ZNF713              | 7 | 55974212 | 55974212 | Missense                | SNP | G | C | BRC13   | NM_182633.1     | p.Q104H  |
| uc003tsb.2          | 7 | 56151330 | 56151330 | Missense                | SNP | G | T | CSB31   | ENST00000329309 | p.L58M   |
| LOC730382           | 7 | 56722486 | 56722486 | Silent                  | SNP | C | G | BRC50   | XM_001714509.2  | p.V48    |
| ENSG0000019923<br>1 | 7 | 62273806 | 62273806 | RNA                     | SNP | C | T | BRC31   | ENST00000362361 | NULL     |
| AUTS2               | 7 | 69866264 | 69866264 | Splice_Site             | SNP | G | T | BRC29   | NM_015570.1     | e7+1     |
| BAZ1B               | 7 | 72494539 | 72494539 | Missense                | SNP | C | G | CSB1    | NM_032408.2     | p.D1459H |
| CLIP2               | 7 | 73428320 | 73428320 | Silent                  | SNP | G | T | CSB31   | NM_003388.4     | p.S551   |
| GTF2I               | 7 | 73811070 | 73811070 | Missense                | SNP | C | G | CSB2    | NM_032999.3     | p.S988C  |
| WBSCR16             | 7 | 74124456 | 74124456 | Missense                | SNP | T | C | CSB13   | NM_030798.3     | p.K130E  |
| HIP1                | 7 | 75059629 | 75059629 | Silent                  | SNP | C | T | BRC21   | NM_005338.4     | p.P108   |
| ENSG0000021657<br>5 | 7 | 75200876 | 75200876 | Missense                | SNP | G | C | BRC32   | ENST00000404944 | p.S42C   |
| STYXL1              | 7 | 75472637 | 75472637 | Missense                | SNP | A | G | CSB27   | NM_016086.2     | p.Y159H  |
| FGL2                | 7 | 76664200 | 76664200 | Missense                | SNP | C | T | BRC33   | NM_006682.2     | p.A218T  |
| MAGI2               | 7 | 77627524 | 77627524 | Missense                | SNP | C | G | CSB1    | NM_012301.3     | p.E867Q  |
| LOC100131944        | 7 | 78644251 | 78644251 | Missense                | SNP | C | G | BRC47   | XM_001723309.1  | p.Q31E   |
| PCLO                | 7 | 82289861 | 82289861 | Missense                | SNP | G | A | BRC5    | NM_033026.2     | p.H4893Y |
| SEMA3E              | 7 | 82872737 | 82872737 | Silent                  | SNP | C | T | BRC11   | NM_012431.1     | p.K321   |
| SEMA3E              | 7 | 83115716 | 83115716 | Missense                | SNP | C | G | CSB1    | NM_012431.1     | p.D27H   |
| ABCB1               | 7 | 87016707 | 87016707 | Missense                | SNP | C | T | BRC31   | NM_000927.3     | p.A540T  |
| ENSG0000021151<br>8 | 7 | 88107799 | 88107799 | RNA                     | DEL | A |   | 0 BRC21 | ENST00000390184 | NULL     |
| PFTK1               | 7 | 90451424 | 90451424 | Missense                | SNP | A | C | BRC47   | NM_012395.2     | p.M307L  |
| AKAP9               | 7 | 91574587 | 91574587 | Missense                | SNP | G | C | CSB1    | NM_005751.4     | p.E3821Q |
| FAM133B             | 7 | 92044419 | 92044419 | Silent                  | SNP | C | T | BRC13   | NM_152789.1     | p.K133   |
| SAMD9               | 7 | 92570331 | 92570331 | Nonsense                | SNP | G | A | BRC39   | NM_017654.2     | p.Q1006* |
| SAMD9               | 7 | 92570978 | 92570978 | Missense                | SNP | T | C | CSB15   | NM_017654.2     | p.E790G  |
| SAMD9               | 7 | 92571945 | 92571945 | Missense                | SNP | C | G | CSB5    | NM_017654.2     | p.V468L  |
| FLJ42280            | 7 | 95950220 | 95950220 | RNA                     | SNP | C | A | BRC7    | XR_040255.1     | NULL     |
| DLX5                | 7 | 96489575 | 96489575 | Missense                | SNP | T | G | BRC39   | NM_005221.5     | p.K133T  |
| ACN9                | 7 | 96585091 | 96585091 | Silent                  | SNP | G | A | BRC13   | NM_020186.2     | p.R40    |

|         |   |           |           |                    |     |   |   |        |                |          |
|---------|---|-----------|-----------|--------------------|-----|---|---|--------|----------------|----------|
| TMEM130 | 7 | 98295746  | 98295746  | Silent             | SNP | G | A | CSB19  | NM_152913.1    | p.F181   |
| PTCD1   | 7 | 98859412  | 98859412  | Missense           | SNP | C | A | CSB15  | NM_015545.2    | p.K614N  |
| ZKSCAN1 | 7 | 99459082  | 99459082  | Missense           | SNP | C | T | CSB24  | NM_003439.1    | p.S6L    |
| PVRIG   | 7 | 99656572  | 99656572  | Missense           | SNP | C | A | BRC29  | NM_024070.3    | p.A248D  |
| EPO     | 7 | 100158238 | 100158238 | Missense           | SNP | G | A | BRC12  | NM_000799.2    | p.V88I   |
| EPHB4   | 7 | 100248680 | 100248680 | Missense           | SNP | C | T | BRC20  | NM_004444.4    | p.V615I  |
| MUC17   | 7 | 100465370 | 100465370 | Missense           | SNP | C | T | CSB1   | NM_001040105.1 | p.S1318F |
| MUC17   | 7 | 100466732 | 100466732 | Missense           | SNP | C | T | BRC42  | NM_001040105.1 | p.T1772I |
| MUC17   | 7 | 100473204 | 100473204 | Silent             | SNP | C | T | BRC39  | NM_001040105.1 | p.I3929  |
| PLOD3   | 7 | 100640376 | 100640376 | Nonsense           | SNP | C | A | BRC30  | NM_001084.4    | p.E524*  |
| PRKRIP1 | 7 | 101825105 | 101825105 | Missense           | SNP | G | A | CSB1   | NM_024653.3    | p.E54K   |
| LRWD1   | 7 | 101897026 | 101897026 | Missense           | SNP | C | T | CSB22  | NM_152892.1    | p.T410M  |
| DNAJC2  | 7 | 102769460 | 102769460 | Missense           | SNP | G | A | CSB14  | NM_014377.1    | p.P81L   |
| RELN    | 7 | 102925795 | 102925795 | Missense           | SNP | T | G | BRC17  | NM_005045.3    | p.Q2936H |
| RELN    | 7 | 102930701 | 102930701 | Silent             | SNP | T | G | BRC29  | NM_005045.3    | p.G2829  |
| RELN    | 7 | 102993990 | 102993990 | Missense           | SNP | G | C | BRC41  | NM_005045.3    | p.A1618G |
| MLL5    | 7 | 104535463 | 104535463 | Missense           | SNP | T | C | BRC9   | NM_018682.3    | p.M1108T |
| SRPK2   | 7 | 104588290 | 104588290 | Missense           | SNP | C | A | BRC8   | NM_182692.1    | p.C174F  |
| PIK3CG  | 7 | 106295294 | 106295294 | Nonsense           | SNP | C | T | CSB28  | NM_002649.2    | p.R18*   |
| LAMB1   | 7 | 107357276 | 107357276 | Missense           | SNP | A | G | CSB21  | NM_002291.2    | p.I1521T |
| LAMB4   | 7 | 107497506 | 107497506 | Missense           | SNP | C | T | BRC39  | NM_007356.2    | p.E729K  |
| NRCAM   | 7 | 107607959 | 107607959 | Missense           | SNP | T | C | CSB22  | NM_001037132.1 | p.N932S  |
| DOCK4   | 7 | 111155611 | 111155611 | Silent             | SNP | G | A | BRC51  | NM_014705.3    | p.P1952  |
| DOCK4   | 7 | 111174722 | 111174722 | Missense           | SNP | G | C | CSB31  | NM_014705.3    | p.P1468R |
| C7orf60 | 7 | 112366922 | 112366922 | Silent             | SNP | C | G | BRC24  | NM_152556.2    | p.V40    |
| MET     | 7 | 116127162 | 116127162 | Missense           | SNP | C | T | BRC20  | NM_000245.2    | p.T263M  |
| CAPZA2  | 7 | 116333610 | 116333610 | Nonsense           | SNP | C | T | CSB1   | NM_006136.2    | p.Q162*  |
| CTTNBP2 | 7 | 117204908 | 117204908 | Missense           | SNP | C | G | BRC39  | NM_033427.2    | p.E891Q  |
| PTPRZ1  | 7 | 121437752 | 121437752 | Silent             | SNP | G | C | CSB6   | NM_002851.2    | p.T472   |
| CADPS2  | 7 | 121878761 | 121878761 | Missense           | SNP | C | A | BRC31  | NM_017954.2    | p.D731Y  |
| SLC13A1 | 7 | 122574556 | 122574556 | Silent             | SNP | C | G | BRC39  | NM_022444.3    | p.V235   |
| PAX4    | 7 | 127038484 | 127038484 | Frame Shift<br>Del | DEL | G |   | 0 BRC6 | NM_006193.2    | p.P301fs |
| SND1    | 7 | 127132144 | 127132144 | Missense           | SNP | G | A | BRC37  | NM_014390.2    | p.E286K  |
| IMPDH1  | 7 | 127828371 | 127828371 | Silent             | SNP | C | T | BRC51  | NM_000883.3    | p.L146   |



|                     |   |           |           |             |     |   |   |       |                 |          |
|---------------------|---|-----------|-----------|-------------|-----|---|---|-------|-----------------|----------|
| METTL2B             | 7 | 127906591 | 127906591 | Missense    | SNP | T | A | CSB23 | NM_018396.2     | p.F116I  |
| FAM71F1             | 7 | 128157269 | 128157269 | Missense    | SNP | T | C | BRC29 | NM_032599.2     | p.W311R  |
| CALU                | 7 | 128181684 | 128181684 | Silent      | SNP | C | T | BRC31 | NM_001219.1     | p.L118   |
| CCDC136             | 7 | 128245110 | 128245110 | Silent      | SNP | G | A | CSB27 | NM_022742.3     | p.S1142  |
| KCP                 | 7 | 128334397 | 128334397 | Missense    | SNP | C | T | BRC19 | ENST00000257704 | p.R159H  |
| CPA4                | 7 | 129732917 | 129732917 | Missense    | SNP | G | A | BRC23 | NM_016352.3     | p.R171Q  |
| CPA5                | 7 | 129789554 | 129789554 | Missense    | SNP | G | A | CSB20 | NM_080385.1     | p.D192N  |
| CPA5                | 7 | 129794513 | 129794513 | Silent      | SNP | G | A | BRC7  | NM_080385.1     | p.P301   |
| PLXNA4              | 7 | 131468405 | 131468405 | Missense    | SNP | G | C | CSB1  | NM_020911.1     | p.F1844L |
| PLXNA4              | 7 | 131842825 | 131842825 | Missense    | SNP | C | T | BRC18 | NM_020911.1     | p.D390N  |
| PLXNA4              | 7 | 131843852 | 131843852 | Silent      | SNP | G | A | BRC22 | NM_020911.1     | p.P47    |
| CHRM2               | 7 | 136350455 | 136350455 | Silent      | SNP | C | T | BRC16 | NM_000739.2     | p.A101   |
| CHRM2               | 7 | 136350481 | 136350481 | Missense    | SNP | C | T | BRC39 | NM_000739.2     | p.S110L  |
| TTC26               | 7 | 138470079 | 138470079 | Splice_Site | SNP | G | A | CSB19 | NM_024926.1     | e2+1     |
| KLRG2               | 7 | 138788937 | 138788937 | Missense    | SNP | C | T | CSB19 | NM_198508.2     | p.G389D  |
| BRAF                | 7 | 140099603 | 140099603 | Missense    | SNP | T | C | BRC15 | NM_004333.4     | p.K601E  |
| BRAF                | 7 | 140181072 | 140181072 | Missense    | SNP | C | A | CSB2  | NM_004333.4     | p.G104W  |
| LOC100131199        | 7 | 140817035 | 140817035 | Nonsense    | SNP | G | T | BRC37 | XM_001714428.1  | p.E190*  |
| PRSS1               | 7 | 142170855 | 142170855 | Silent      | SNP | C | T | BRC37 | ENST00000311737 | p.F87    |
| PRSS1               | 7 | 142171043 | 142171043 | Missense    | SNP | C | G | BRC37 | ENST00000311737 | p.S150C  |
| EPHB6               | 7 | 142274838 | 142274838 | Missense    | SNP | T | A | CSB2  | NM_004445.3     | p.V532E  |
| TRPV5               | 7 | 142332792 | 142332792 | Missense    | SNP | C | T | BRC15 | NM_019841.4     | p.R359H  |
| OR6V1               | 7 | 142460240 | 142460240 | Silent      | SNP | C | A | BRC41 | NM_001001667.1  | p.P227   |
| CASP2               | 7 | 142712173 | 142712173 | Missense    | SNP | G | C | CSB1  | NM_032982.2     | p.D416H  |
| FAM131B             | 7 | 142764612 | 142764612 | Missense    | SNP | C | T | CSB1  | NM_001031690.2  | p.E137K  |
| TAS2R41             | 7 | 142885386 | 142885386 | Missense    | SNP | G | T | CSB15 | NM_176883.2     | p.C100F  |
| ENSG0000022214<br>9 | 7 | 148453866 | 148453866 | RNA         | SNP | G | C | BRC50 | ENST00000410217 | NULL     |
| ZNF783              | 7 | 148611865 | 148611865 | RNA         | SNP | C | G | BRC7  | NM_001004302.2  | NULL     |
| SSPO                | 7 | 149153945 | 149153945 | Missense    | SNP | T | A | BRC41 | ENST00000326295 | p.W133R  |
| GIMAP4              | 7 | 149900852 | 149900852 | Missense    | SNP | G | T | BRC16 | NM_018326.2     | p.R254L  |
| GIMAP1              | 7 | 150048548 | 150048548 | Missense    | SNP | C | T | BRC8  | NM_130759.2     | p.R175C  |
| ASB10               | 7 | 150509324 | 150509324 | Missense    | SNP | C | T | BRC31 | NM_080871.1     | p.E247K  |
| ABCF2               | 7 | 150549678 | 150549678 | Silent      | SNP | G | A | BRC33 | NM_005692.3     | p.L280   |
| WDR86               | 7 | 150723909 | 150723909 | Silent      | SNP | G | A | CSB20 | NM_198285.2     | p.P204   |



|              |   |           |           |                         |     |       |   |         |                 |           |
|--------------|---|-----------|-----------|-------------------------|-----|-------|---|---------|-----------------|-----------|
| MLL3         | 7 | 151480834 | 151480834 | Nonsense<br>Frame Shift | SNP | G     | A | BRC6    | NM_170606.2     | p.R4139*  |
| MLL3         | 7 | 151487020 | 151487023 | Del<br>Frame Shift      | DEL | CTTC  | 0 | CSB27   | NM_170606.2     | p.G3843fs |
| MLL3         | 7 | 151508119 | 151508123 | Del<br>Frame Shift      | DEL | AGAAT | 0 | BRC3    | NM_170606.2     | p.I2391fs |
| MLL3         | 7 | 151550670 | 151550670 | Ins                     | INS |       | 0 | T BRC21 | NM_170606.2     | p.T1118fs |
| MLL3         | 7 | 151552526 | 151552526 | Missense                | SNP | C     | T | CSB28   | NM_170606.2     | p.D1029N  |
| FLJ42291     | 7 | 152738587 | 152738587 | RNA                     | SNP | G     | T | BRC51   | XR_040032.1     | NULL      |
| LOC100130228 | 7 | 153052662 | 153052662 | Missense                | SNP | C     | T | BRC39   | XM_001721136.1  | p.S26L    |
| DPP6         | 7 | 154308212 | 154308212 | Silent                  | SNP | G     | A | BRC39   | ENST00000377770 | p.P12     |
| PAXIP1       | 7 | 154369027 | 154369027 | Missense                | SNP | G     | C | CSB9    | NM_007349.3     | p.Q1059E  |
| PAXIP1       | 7 | 154398605 | 154398605 | Missense                | SNP | C     | T | CSB26   | NM_007349.3     | p.E270K   |
| PTPRN2       | 7 | 157677785 | 157677785 | Missense                | SNP | C     | T | CSB14   | NM_002847.3     | p.A182T   |
| FAM62B       | 7 | 158224519 | 158224519 | Silent                  | SNP | G     | A | BRC16   | NM_020728.2     | p.H768    |
| WDR60        | 7 | 158415953 | 158415953 | Missense                | SNP | C     | G | BRC47   | NM_018051.4     | p.I844M   |
| WDR60        | 7 | 158427503 | 158427503 | Missense                | SNP | G     | A | BRC32   | NM_018051.4     | p.V969M   |
| DLGAP2       | 8 | 1603946   | 1603946   | Missense                | SNP | C     | T | BRC5    | NM_004745.3     | p.P539S   |
| ARHGEF10     | 8 | 1812297   | 1812297   | Missense                | SNP | A     | G | BRC11   | NM_014629.2     | p.H278R   |
| MFHAS1       | 8 | 8786122   | 8786122   | Silent                  | SNP | C     | T | BRC50   | NM_004225.2     | p.Q619    |
| RP1L1        | 8 | 10504177  | 10504177  | Missense                | SNP | C     | T | BRC29   | NM_178857.5     | p.R1614Q  |
| DLC1         | 8 | 13401710  | 13401710  | Missense                | SNP | A     | T | BRC20   | NM_182643.3     | p.L81H    |
| DLC1         | 8 | 13401920  | 13401920  | Missense                | SNP | T     | A | BRC47   | NM_182643.3     | p.E11V    |
| TUSC3        | 8 | 15524981  | 15524981  | Missense                | SNP | G     | A | CSB1    | NM_006765.2     | p.E54K    |
| EFHA2        | 8 | 16983590  | 16983590  | Missense                | SNP | G     | A | BRC50   | NM_181723.1     | p.E222K   |
| PCM1         | 8 | 17841860  | 17841860  | Silent                  | SNP | G     | A | BRC18   | ENST00000325126 | p.R271    |
| PCM1         | 8 | 17854914  | 17854914  | Silent<br>Frame Shift   | SNP | A     | G | BRC15   | NM_006197.3     | p.K409    |
| LPL          | 8 | 19861171  | 19861172  | Del                     | DEL | TG    | 0 | BRC11   | NM_000237.2     | p.L380fs  |
| STC1         | 8 | 23764908  | 23764908  | Missense                | SNP | A     | G | BRC50   | NM_003155.2     | p.S115P   |
| NEFL         | 8 | 24869868  | 24869868  | Missense                | SNP | A     | G | BRC41   | ENST00000221169 | p.S27P    |
| KCTD9        | 8 | 25359683  | 25359683  | Missense                | SNP | C     | T | CSB34   | NM_017634.2     | p.V17M    |
| EBF2         | 8 | 25946585  | 25946585  | Nonsense                | SNP | G     | A | BRC15   | NM_022659.2     | p.R162*   |
| BNIP3L       | 8 | 26321686  | 26321686  | Missense                | SNP | G     | A | BRC50   | NM_004331.2     | p.R163H   |
| LOC100130267 | 8 | 26362105  | 26362105  | Missense                | SNP | A     | C | BRC11   | XM_001723339.1  | p.R18S    |
| SCARA3       | 8 | 27572424  | 27572424  | Missense                | SNP | G     | C | CSB21   | NM_016240.2     | p.G273A   |
| SCARA5       | 8 | 27820596  | 27820596  | Missense                | SNP | G     | A | BRC22   | NM_173833.4     | p.R362C   |

|              |   |          |          |          |     |   |   |       |                |          |
|--------------|---|----------|----------|----------|-----|---|---|-------|----------------|----------|
| C8orf41      | 8 | 33486943 | 33486943 | Missense | SNP | G | C | CSB1  | NM_001102401.1 | p.L233V  |
| UNC5D        | 8 | 35703352 | 35703352 | Missense | SNP | A | G | BRC51 | NM_080872.2    | p.K477E  |
| KCNU1        | 8 | 36761175 | 36761175 | Missense | SNP | C | T | BRC47 | NM_001031836.2 | p.S30F   |
| RAB11FIP1    | 8 | 37854056 | 37854056 | Missense | SNP | A | T | CSB9  | NM_001002814.1 | p.N181K  |
| ADAM9        | 8 | 39067988 | 39067988 | Missense | SNP | G | A | CSB30 | NM_003816.1    | p.R755Q  |
| ADAM2        | 8 | 39726063 | 39726063 | Missense | SNP | G | C | BRC11 | NM_001464.3    | p.Q647E  |
| ADAM2        | 8 | 39813854 | 39813854 | Silent   | SNP | C | T | CSB8  | NM_001464.3    | p.P30    |
| IDO2         | 8 | 39955779 | 39955779 | Missense | SNP | C | T | CSB7  | NM_194294.2    | p.R91W   |
| LOC100129400 | 8 | 41641896 | 41641896 | Silent   | SNP | G | T | BRC33 | XM_001724708.1 | p.L133   |
| DKK4         | 8 | 42350894 | 42350894 | Missense | SNP | G | C | BRC31 | NM_014420.2    | p.Q186E  |
| SLC20A2      | 8 | 42413901 | 42413901 | Missense | SNP | C | T | CSB22 | NM_006749.3    | p.R429H  |
| HOOK3        | 8 | 42940805 | 42940805 | Missense | SNP | G | A | BRC36 | NM_032410.3    | p.R271H  |
| HGSNAT       | 8 | 43173702 | 43173702 | Missense | SNP | C | G | BRC39 | NM_152419.2    | p.L581V  |
| POTEA        | 8 | 43267031 | 43267031 | Missense | SNP | C | T | CSB1  | NM_001005365.1 | p.L83F   |
| PXDNL        | 8 | 52532730 | 52532730 | Missense | SNP | C | A | BRC6  | NM_144651.4    | p.G288V  |
| ST18         | 8 | 53289319 | 53289319 | Missense | SNP | C | G | BRC6  | NM_014682.2    | p.E18Q   |
| RB1CC1       | 8 | 53731514 | 53731514 | Missense | SNP | C | T | BRC39 | NM_014781.1    | p.R1143K |
| RB1CC1       | 8 | 53732391 | 53732391 | Missense | SNP | C | G | BRC29 | NM_014781.1    | p.V851L  |
| RB1CC1       | 8 | 53743173 | 53743173 | Silent   | SNP | G | A | BRC41 | NM_014781.1    | p.S378   |
| LYN          | 8 | 57073516 | 57073516 | Missense | SNP | G | A | BRC44 | NM_002350.1    | p.A370T  |
| SDCBP        | 8 | 59653206 | 59653206 | Missense | SNP | G | A | BRC16 | NM_001007067.1 | p.G155R  |
| SDCBP        | 8 | 59654817 | 59654817 | Silent   | SNP | C | G | CSB1  | NM_001007067.1 | p.S220   |
| CHD7         | 8 | 61875512 | 61875512 | Silent   | SNP | C | T | CSB34 | NM_017780.2    | p.S750   |
| CHD7         | 8 | 61897163 | 61897163 | Silent   | SNP | G | A | BRC18 | NM_017780.2    | p.K954   |
| CHD7         | 8 | 61940408 | 61940408 | Missense | SNP | G | A | CSB1  | NM_017780.2    | p.G2786R |
| MYBL1        | 8 | 67654945 | 67654945 | Missense | SNP | C | T | BRC31 | NM_001080416.2 | p.E360K  |
| SGK3         | 8 | 67910567 | 67910567 | Missense | SNP | C | T | BRC44 | NM_001033578.1 | p.R181W  |
| COPS5        | 8 | 68131378 | 68131378 | Missense | SNP | C | G | BRC5  | NM_006837.2    | p.D197H  |
| CSPP1        | 8 | 68238552 | 68238552 | Missense | SNP | C | T | CSB22 | NM_001077204.1 | p.P922L  |
| SULF1        | 8 | 70661203 | 70661203 | Missense | SNP | G | A | CSB2  | NM_015170.1    | p.R157Q  |
| XKR9         | 8 | 71809147 | 71809147 | Silent   | SNP | A | G | BRC49 | NM_001011720.1 | p.K352   |
| TRPA1        | 8 | 73097809 | 73097809 | Silent   | SNP | A | G | CSB19 | NM_007332.2    | p.D1082  |
| CRISPLD1     | 8 | 76087255 | 76087255 | Missense | SNP | A | T | BRC16 | NM_031461.4    | p.E97D   |
| ZFHX4        | 8 | 77779962 | 77779962 | Missense | SNP | G | A | BRC32 | NM_024721.3    | p.G362S  |
| FAM164A      | 8 | 79761292 | 79761292 | Silent   | SNP | G | A | BRC50 | NM_016010.2    | p.R82    |

|          |   |           |           |                    |     |       |   |   |       |                 |                                  |
|----------|---|-----------|-----------|--------------------|-----|-------|---|---|-------|-----------------|----------------------------------|
| STMN2    | 8 | 80711613  | 80711613  | Frame Shift<br>Del | DEL | A     |   | 0 | CSB14 | NM_007029.2     | p.E14fs                          |
| STMN2    | 8 | 80711634  | 80711634  | Missense           | SNP | T     | C |   | BRC51 | NM_007029.2     | p.I21T                           |
| HEY1     | 8 | 80840453  | 80840453  | Missense           | SNP | G     | C |   | BRC47 | NM_001040708.1  | p.S151C                          |
| NBN      | 8 | 91064211  | 91064211  | Missense           | SNP | T     | C |   | CSB16 | NM_002485.4     | p.K29R                           |
| DECR1    | 8 | 91126283  | 91126283  | Missense           | SNP | A     | G |   | BRC38 | NM_001359.1     | p.T257A                          |
| LRRC69   | 8 | 92282051  | 92282051  | Missense           | SNP | C     | T |   | BRC32 | ENST00000343709 | p.A107V                          |
| TMEM67   | 8 | 94863061  | 94863061  | Splice_Site        | SNP | G     | A |   | BRC13 | NM_153704.1     | e10-1                            |
| INTS8    | 8 | 95946940  | 95946940  | Nonsense           | SNP | G     | T |   | CSB1  | NM_017864.2     | p.E703*<br>p.E973in<br>Frame del |
| INTS8    | 8 | 95961563  | 95961563  | In Frame Del       | DEL | AGA   |   | 0 | CSB3  | NM_017864.2     |                                  |
| CCNE2    | 8 | 95966898  | 95966898  | Missense           | SNP | T     | C |   | BRC33 | NM_057749.1     | p.D222G                          |
| PTDSS1   | 8 | 97365517  | 97365517  | Silent             | SNP | G     | A |   | CSB19 | NM_014754.1     | p.P92                            |
| PGCP     | 8 | 97866601  | 97866601  | Silent             | SNP | G     | A |   | CSB22 | NM_016134.2     | p.L100                           |
| MATN2    | 8 | 99111979  | 99111983  | Frame Shift<br>Del | DEL | GATGA |   | 0 | BRC39 | NM_002380.3     | p.E825fs                         |
| C8orf47  | 8 | 99170572  | 99170572  | Missense           | SNP | G     | C |   | BRC39 | NM_173549.1     | p.D51H                           |
| C8orf47  | 8 | 99174719  | 99174719  | Missense           | SNP | C     | A |   | CSB20 | NM_173549.1     | p.D369E                          |
| NIPAL2   | 8 | 99293833  | 99293833  | Missense           | SNP | G     | T |   | BRC19 | NM_024759.1     | p.L211M                          |
| PABPC1   | 8 | 101788101 | 101788101 | Missense           | SNP | T     | C |   | BRC22 | NM_002568.3     | p.N519S                          |
| GRHL2    | 8 | 102640125 | 102640125 | Missense           | SNP | C     | T |   | CSB1  | NM_024915.3     | p.S196L                          |
| FZD6     | 8 | 104406806 | 104406806 | Silent             | SNP | C     | T |   | BRC5  | NM_003506.2     | p.L432                           |
| TMEM74   | 8 | 109865816 | 109865816 | Missense           | SNP | G     | A |   | CSB9  | NM_153015.1     | p.R230C                          |
| PKHD1L1  | 8 | 110571415 | 110571415 | Silent             | SNP | T     | C |   | CSB22 | NM_177531.4     | p.D3313                          |
| GOLSYN   | 8 | 110657322 | 110657322 | Silent             | SNP | G     | A |   | BRC18 | NM_001099744.1  | p.L327                           |
| CSMD3    | 8 | 113763973 | 113763973 | Nonsense           | SNP | G     | A |   | BRC39 | NM_198123.2     | p.Q851*                          |
| TRPS1    | 8 | 116496381 | 116496381 | Missense           | SNP | G     | T |   | BRC26 | NM_014112.2     | p.N977K                          |
| TRPS1    | 8 | 116701262 | 116701262 | Missense           | SNP | G     | A |   | CSB20 | NM_014112.2     | p.P80S                           |
| HAS2AS   | 8 | 122725856 | 122725856 | RNA                | SNP | C     | T |   | BRC52 | NR_002835.1     | NULL                             |
| ATAD2    | 8 | 124419208 | 124419208 | Silent             | SNP | T     | C |   | CSB20 | NM_014109.3     | p.P963                           |
| KLHL38   | 8 | 124734097 | 124734097 | Missense           | SNP | G     | A |   | CSB24 | NM_001081675.2  | p.T84I                           |
| FER1L6   | 8 | 125176447 | 125176447 | Missense           | SNP | C     | G |   | BRC41 | NM_001039112.2  | p.P1561R                         |
| ZNF572   | 8 | 126059038 | 126059038 | Missense           | SNP | C     | A |   | BRC39 | NM_152412.2     | p.F449L                          |
| KIAA0196 | 8 | 126140936 | 126140936 | Missense           | SNP | G     | C |   | CSB1  | NM_014846.3     | p.L518V                          |
| KCNQ3    | 8 | 133267554 | 133267554 | Missense           | SNP | T     | C |   | BRC19 | NM_004519.2     | p.Y148C                          |
| TMEM71   | 8 | 133795602 | 133795602 | Nonsense           | SNP | G     | C |   | BRC50 | NM_144649.1     | p.S246*                          |

|           |   |           |           |          |     |   |   |       |                |          |
|-----------|---|-----------|-----------|----------|-----|---|---|-------|----------------|----------|
| TG        | 8 | 133963394 | 133963394 | Missense | SNP | C | A | CSB2  | NM_003235.4    | p.T248K  |
| ZFATAS    | 8 | 135679858 | 135679858 | RNA      | SNP | G | C | BRC18 | NR_002438.1    | NULL     |
| KHDRBS3   | 8 | 136688401 | 136688401 | Missense | SNP | A | T | BRC32 | NM_006558.1    | p.T277S  |
| FAM135B   | 8 | 139234390 | 139234390 | Missense | SNP | T | C | BRC22 | NM_015912.3    | p.I504V  |
| COL22A1   | 8 | 139737362 | 139737362 | Missense | SNP | G | C | BRC11 | NM_152888.1    | p.S1098C |
| TRAPPC9   | 8 | 141505920 | 141505920 | Missense | SNP | C | G | BRC9  | NM_031466.4    | p.A386P  |
| DENND3    | 8 | 142231005 | 142231005 | Nonsense | SNP | C | T | BRC18 | NM_014957.2    | p.Q241*  |
| LY6K      | 8 | 143780022 | 143780022 | Missense | SNP | G | A | BRC10 | NM_017527.2    | p.E94K   |
| TOP1MT    | 8 | 144482989 | 144482989 | Missense | SNP | G | A | CSB28 | NM_052963.1    | p.A89V   |
| MAPK15    | 8 | 144874916 | 144874916 | Missense | SNP | G | C | CSB20 | NM_139021.2    | p.D279H  |
| SCRIB     | 8 | 144957978 | 144957978 | Missense | SNP | G | T | BRC18 | NM_182706.3    | p.P1081T |
| PUF60     | 8 | 144972604 | 144972604 | Missense | SNP | C | T | BRC21 | NM_078480.1    | p.R146H  |
| NRBP2     | 8 | 144992872 | 144992872 | Missense | SNP | C | T | BRC38 | NM_178564.2    | p.A27T   |
| PLEC1     | 8 | 145065644 | 145065644 | Missense | SNP | T | C | CSB24 | NM_201380.2    | p.I3582V |
| PLEC1     | 8 | 145080804 | 145080804 | Missense | SNP | T | A | CSB3  | NM_201380.2    | p.Y480F  |
| PLEC1     | 8 | 145080997 | 145080997 | Missense | SNP | C | T | CSB15 | NM_201380.2    | p.R442H  |
| LOC392275 | 8 | 145177308 | 145177308 | Missense | SNP | G | T | BRC47 | XM_001714032.1 | p.V313L  |
| CYC1      | 8 | 145222865 | 145222865 | Missense | SNP | C | T | CSB5  | NM_001916.3    | p.P91S   |
| SLC39A4   | 8 | 145611471 | 145611471 | Silent   | SNP | G | A | CSB1  | NM_130849.2    | p.F205   |
| SLC39A4   | 8 | 145612910 | 145612910 | Silent   | SNP | C | T | CSB14 | NM_130849.2    | p.P24    |
| KIFC2     | 8 | 145663508 | 145663508 | Missense | SNP | C | T | BRC51 | NM_145754.2    | p.R149W  |
| MFSD3     | 8 | 145707298 | 145707298 | Silent   | SNP | C | T | CSB1  | NM_138431.1    | p.L394   |
| ZNF251    | 8 | 145949966 | 145949966 | Missense | SNP | C | G | BRC11 | NM_138367.1    | p.E62Q   |
| SMARCA2   | 9 | 2113881   | 2113881   | Missense | SNP | C | T | CSB22 | NM_003070.3    | p.R1309C |
| RFX3      | 9 | 3247062   | 3247062   | Silent   | SNP | C | T | BRC13 | NM_134428.2    | p.L581   |
| SLC1A1    | 9 | 4551493   | 4551493   | Missense | SNP | C | T | CSB25 | NM_004170.4    | p.R93C   |
| PDCD1LG2  | 9 | 5539492   | 5539492   | Silent   | SNP | C | G | BRC51 | NM_025239.3    | p.L173   |
| ERMP1     | 9 | 5795058   | 5795058   | Missense | SNP | G | A | CSB14 | NM_024896.2    | p.A628V  |
| GLDC      | 9 | 6578669   | 6578669   | Missense | SNP | C | G | CSB1  | NM_000170.2    | p.M538I  |
| PTPRD     | 9 | 8508269   | 8508269   | Silent   | SNP | C | A | CSB21 | NM_002839.1    | p.A374   |
| PTPRD     | 9 | 8511518   | 8511518   | Silent   | SNP | G | T | BRC18 | NM_002839.1    | p.I240   |
| PTPRD     | 9 | 8723783   | 8723783   | Missense | SNP | C | T | CSB1  | NM_002839.1    | p.E21K   |
| TYRP1     | 9 | 12688602  | 12688602  | Missense | SNP | G | A | BRC11 | NM_000550.2    | p.R287Q  |
| MPDZ      | 9 | 13116716  | 13116716  | Missense | SNP | A | G | BRC15 | NM_003829.3    | p.I1507T |
| MPDZ      | 9 | 13212308  | 13212308  | Missense | SNP | G | A | BRC50 | NM_003829.3    | p.S224L  |

|                 |   |          |          |                                |     |   |   |         |                 |          |
|-----------------|---|----------|----------|--------------------------------|-----|---|---|---------|-----------------|----------|
| NFIB            | 9 | 14140237 | 14140237 | Missense                       | SNP | T | C | BRC30   | NM_005596.2     | p.N238S  |
| ZDHHC21         | 9 | 14680384 | 14680384 | Splice_Site                    | SNP | C | G | BRC11   | NM_178566.3     | e1-1     |
| FREM1           | 9 | 14802998 | 14802998 | Nonsense                       | SNP | G | C | CSB1    | NM_144966.4     | p.S902*  |
| TTC39B          | 9 | 15179623 | 15179623 | Silent                         | SNP | G | A | CSB12   | NM_152574.1     | p.L328   |
| SNAPC3          | 9 | 15437146 | 15437146 | Silent                         | SNP | C | G | BRC51   | NM_001039697.1  | p.L212   |
| PSIP1           | 9 | 15459328 | 15459328 | Missense                       | SNP | G | A | CSB31   | NM_033222.1     | p.S347L  |
| C9orf93         | 9 | 15656202 | 15656202 | Silent                         | SNP | G | A | CSB28   | NM_173550.2     | p.K319   |
| ADAMTSL1        | 9 | 18767806 | 18767806 | Silent                         | SNP | C | T | CSB20   | NM_001040272.4  | p.S1193  |
| IFNA1           | 9 | 21431033 | 21431033 | Missense                       | SNP | C | T | BRC44   | NM_024013.1     | p.S176F  |
| MTAP            | 9 | 21849395 | 21849395 | Missense                       | SNP | G | C | CSB1    | NM_002451.3     | p.E262Q  |
| ENSG00000222693 | 9 | 25079077 | 25079077 | RNA                            | SNP | C | T | BRC30   | ENST00000410761 | NULL     |
| PLAA            | 9 | 26895515 | 26895515 | Silent                         | SNP | C | T | BRC16   | NM_001031689.2  | p.L794   |
| TAF1L           | 9 | 32621395 | 32621395 | Nonsense                       | SNP | G | A | BRC52   | NM_153809.2     | p.R1395* |
| TAF1L           | 9 | 32621994 | 32621994 | Missense                       | SNP | C | A | BRC3    | NM_153809.2     | p.G1195V |
| DNAJA1          | 9 | 33016607 | 33016607 | Missense                       | SNP | G | A | BRC39   | NM_001539.2     | p.G42E   |
| B4GALT1         | 9 | 33106008 | 33106008 | Missense                       | SNP | C | A | CSB7    | NM_001497.3     | p.D314Y  |
| GALT            | 9 | 34639008 | 34639008 | Missense                       | SNP | C | G | BRC51   | NM_000155.2     | p.I278M  |
| STOML2          | 9 | 35090607 | 35090607 | Silent                         | SNP | G | A | BRC41   | NM_013442.1     | p.S307   |
| UNC13B          | 9 | 35390417 | 35390417 | Missense                       | SNP | T | G | BRC44   | NM_006377.3     | p.F1405C |
| FAM166B         | 9 | 35552658 | 35552658 | Missense                       | SNP | A | C | CSB27   | NM_001099951.1  | p.F178V  |
| TLN1            | 9 | 35702914 | 35702914 | Missense                       | SNP | T | A | BRC16   | NM_006289.3     | p.D1160V |
| NPR2            | 9 | 35792255 | 35792255 | Missense                       | SNP | G | A | BRC36   | NM_003995.3     | p.R562Q  |
| RECK            | 9 | 36111586 | 36111586 | Silent                         | SNP | C | T | BRC44   | NM_021111.2     | p.H865   |
| RNF38           | 9 | 36346321 | 36346321 | Missense                       | SNP | G | C | CSB1    | NM_022781.4     | p.F296L  |
| ZBTB5           | 9 | 37431928 | 37431928 | Silent                         | SNP | G | C | CSB1    | NM_014872.2     | p.P207   |
| FRMPD1          | 9 | 37697533 | 37697533 | Silent                         | SNP | T | A | BRC41   | NM_014907.1     | p.S74    |
| PRKACG          | 9 | 70818516 | 70818516 | Missense                       | SNP | C | T | BRC23   | NM_002732.3     | p.V105I  |
| TMEM2           | 9 | 73522697 | 73522697 | Missense                       | SNP | C | T | BRC38   | NM_013390.1     | p.V796I  |
| GDA             | 9 | 74032733 | 74032733 | Missense                       | SNP | G | A | BRC13   | NM_004293.3     | p.E293K  |
| ALDH1A1         | 9 | 74721661 | 74721661 | Missense                       | SNP | G | A | BRC51   | NM_000689.3     | p.P344S  |
| PCSK5           | 9 | 77900755 | 77900755 | Missense                       | SNP | G | A | CSB20   | NM_006200.3     | p.G342R  |
| PCSK5           | 9 | 77993865 | 77993865 | Missense                       | SNP | G | A | BRC18   | NM_006200.3     | p.G806S  |
| PRUNE2          | 9 | 78510036 | 78510036 | Missense                       | SNP | G | A | BRC7    | ENST00000376718 | p.S1966F |
| PRUNE2          | 9 | 78514569 | 78514569 | Missense<br>Frame Shift<br>Del | DEL | T |   | 0 CSB29 | ENST00000376718 | p.N455fs |

|                     |   |           |           |          |     |   |   |         |                 |           |
|---------------------|---|-----------|-----------|----------|-----|---|---|---------|-----------------|-----------|
| PRUNE2              | 9 | 78515666  | 78515666  | Silent   | SNP | G | A | BRC16   | ENST00000376718 | p.D89     |
| PRUNE2              | 9 | 78655327  | 78655327  | Silent   | SNP | C | T | BRC13   | ENST00000376713 | p.T72     |
| VPS13A              | 9 | 79006133  | 79006133  | Silent   | SNP | T | C | BRC16   | NM_033305.1     | p.V59     |
| VPS13A              | 9 | 79123107  | 79123107  | Del      | DEL | G |   | 0 CSB34 | NM_033305.1     | p.W1698fs |
| VPS13A              | 9 | 79126436  | 79126436  | Silent   | SNP | C | T | BRC13   | NM_033305.1     | p.F1928   |
| VPS13A              | 9 | 79156119  | 79156119  | Silent   | SNP | G | A | BRC36   | NM_033305.1     | p.P2452   |
| ENSG0000020456<br>2 | 9 | 83722507  | 83722507  | Missense | SNP | C | T | CSB29   | ENST00000376459 | p.S127F   |
| FAM75B              | 9 | 83865976  | 83865976  | Missense | SNP | G | A | BRC4    | NM_001098807.1  | p.P90L    |
| KIF27               | 9 | 85708147  | 85708147  | Missense | SNP | G | C | BRC32   | NM_017576.1     | p.A369G   |
| C9orf79             | 9 | 89690389  | 89690389  | Silent   | SNP | G | T | BRC17   | NM_178828.4     | p.P389    |
| C9orf79             | 9 | 89692916  | 89692916  | Missense | SNP | C | A | BRC49   | NM_178828.4     | p.H1232N  |
| LOC645961           | 9 | 89935654  | 89935654  | RNA      | SNP | G | C | CSB1    | XR_040572.1     | NULL      |
| NXNL2               | 9 | 90340449  | 90340449  | Missense | SNP | C | T | BRC44   | NM_145283.1     | p.P94S    |
| LOC340515           | 9 | 92384781  | 92384781  | RNA      | SNP | C | T | BRC6    | XR_041526.1     | NULL      |
| FAM120A             | 9 | 95366400  | 95366400  | Silent   | SNP | G | A | CSB1    | NM_014612.3     | p.S1038   |
| ZNF169              | 9 | 96103293  | 96103293  | Silent   | SNP | C | T | CSB12   | NM_194320.2     | p.C544    |
| C9orf3              | 9 | 96758027  | 96758027  | Missense | SNP | G | A | CSB25   | NM_032823.3     | p.R495Q   |
| MIRN23B             | 9 | 96887356  | 96887356  | RNA      | SNP | C | T | CSB12   | ENST00000384832 | NULL      |
| HABP4               | 9 | 98292117  | 98292117  | Silent   | SNP | G | A | CSB7    | NM_014282.2     | p.P406    |
| FAM22G              | 9 | 98739364  | 98739364  | Missense | SNP | C | T | CSB1    | NM_001045477.1  | p.H394Y   |
| FAM22G              | 9 | 98740069  | 98740069  | Nonsense | SNP | G | T | CSB1    | NM_001045477.1  | p.E469*   |
| KIAA1529            | 9 | 99127289  | 99127289  | Missense | SNP | G | A | CSB10   | ENST00000395220 | p.R668K   |
| NCBP1               | 9 | 99465094  | 99465094  | Missense | SNP | G | A | BRC44   | NM_002486.4     | p.E581K   |
| GALNT12             | 9 | 100628870 | 100628870 | Missense | SNP | G | A | BRC26   | NM_024642.3     | p.R186H   |
| COL15A1             | 9 | 100787774 | 100787774 | Silent   | SNP | C | T | BRC47   | NM_001855.3     | p.F69     |
| INVS                | 9 | 102055237 | 102055237 | Missense | SNP | G | A | BRC39   | NM_014425.2     | p.E488K   |
| GRIN3A              | 9 | 103472603 | 103472603 | Missense | SNP | G | A | BRC37   | NM_133445.2     | p.R638W   |
| GRIN3A              | 9 | 103539621 | 103539621 | Silent   | SNP | G | A | CSB1    | NM_133445.2     | p.I154    |
| SMC2                | 9 | 105916847 | 105916847 | Silent   | SNP | G | C | CSB1    | NM_001042550.1  | p.L529    |
| OR13C8              | 9 | 106371919 | 106371919 | Missense | SNP | C | G | CSB1    | NM_001004483.1  | p.S217C   |
| OR13C9              | 9 | 106419955 | 106419955 | Missense | SNP | T | G | BRC41   | NM_001001956.1  | p.M118L   |
| TMEM38B             | 9 | 107550217 | 107550217 | Missense | SNP | C | G | BRC11   | NM_018112.1     | p.F195L   |
| ZNF462              | 9 | 108727182 | 108727182 | Missense | SNP | G | A | BRC39   | NM_021224.4     | p.E390K   |
| PALM2               | 9 | 111744850 | 111744850 | Missense | SNP | C | G | BRC39   | NM_053016.1     | p.S189C   |

|           |   |           |           |          |     |   |   |         |                 |          |
|-----------|---|-----------|-----------|----------|-----|---|---|---------|-----------------|----------|
| SVEP1     | 9 | 112189536 | 112189536 | Missense | SNP | C | G | BRC50   | NM_153366.3     | p.E3304Q |
| SVEP1     | 9 | 112273507 | 112273507 | Missense | SNP | G | C | BRC21   | NM_153366.3     | p.P986A  |
| FKBP15    | 9 | 114988395 | 114988395 | Silent   | SNP | G | T | CSB10   | NM_015258.1     | p.R485   |
| C9orf43   | 9 | 115225529 | 115225529 | Missense | SNP | G | A | BRC50   | NM_152786.1     | p.E196K  |
| KIF12     | 9 | 115895429 | 115895429 | Silent   | SNP | C | T | CSB15   | NM_138424.1     | p.L361   |
| TNC       | 9 | 116828730 | 116828730 | Missense | SNP | G | T | CSB2    | NM_002160.2     | p.H2079N |
| DIPAS     | 9 | 118199210 | 118199210 | RNA      | SNP | G | C | BRC39   | XR_041635.1     | NULL     |
| TLR4      | 9 | 119516123 | 119516123 | Silent   | SNP | C | A | BRC44   | NM_138554.3     | p.T632   |
| LOC389787 | 9 | 119885252 | 119885252 | Missense | SNP | T | A | CSB25   | XM_001725747.1  | p.H43L   |
| C5        | 9 | 122755936 | 122755936 | Silent   | SNP | A | G | BRC13   | NM_001735.2     | p.I1598  |
| TLL11     | 9 | 123791343 | 123791343 | Missense | SNP | G | C | BRC39   | NM_194252.1     | p.F497L  |
| OR1N1     | 9 | 124328545 | 124328545 | Missense | SNP | C | G | CSB1    | NM_012363.1     | p.L283F  |
| OR1L4     | 9 | 124526164 | 124526164 | Missense | SNP | G | C | BRC39   | NM_001005235.1  | p.Q25H   |
| RC3H2     | 9 | 124667603 | 124667603 | Missense | SNP | T | C | CSB25   | NM_001100588.1  | p.N494D  |
| ZBTB6     | 9 | 124713114 | 124713114 | Silent   | SNP | G | A | CSB34   | NM_006626.4     | p.P353   |
| RABGAP1   | 9 | 124905222 | 124905222 | Missense | SNP | A | G | CSB29   | NM_012197.3     | p.N968S  |
| NR6A1     | 9 | 126356467 | 126356467 | Missense | SNP | G | A | BRC13   | NM_033334.3     | p.R116C  |
| HSPA5     | 9 | 127041310 | 127041310 | Missense | SNP | C | T | CSB1    | NM_005347.3     | p.E243K  |
| C9orf117  | 9 | 129515162 | 129515162 | Del      | DEL | G |   | 0 BRC38 | NM_001012502.2  | p.Q450fs |
| TTC16     | 9 | 129522183 | 129522183 | Silent   | SNP | A | G | BRC51   | NM_144965.1     | p.Q144   |
| FPGS      | 9 | 129609381 | 129609381 | Missense | SNP | G | C | CSB1    | NM_004957.1     | p.E192Q  |
| AK1       | 9 | 129675155 | 129675155 | Missense | SNP | A | C | CSB22   | NM_000476.2     | p.L5R    |
| ODF2      | 9 | 130296676 | 130296676 | Missense | SNP | G | A | CSB1    | NM_002540.3     | p.E583K  |
| CCBL1     | 9 | 130638145 | 130638145 | Silent   | SNP | G | A | BRC31   | NM_004059.1     | p.T239   |
| FNBP1     | 9 | 131702132 | 131702132 | Silent   | SNP | G | A | CSB21   | NM_015033.2     | p.D540   |
| HMCN2     | 9 | 132264807 | 132264807 | Missense | SNP | G | A | BRC50   | ENST00000277491 | p.E740K  |
| ABL1      | 9 | 132719390 | 132719390 | Silent   | SNP | C | T | BRC50   | NM_007313.3     | p.F85    |
| FIBCD1    | 9 | 132769401 | 132769401 | Silent   | SNP | G | C | CSB1    | NM_032843.1     | p.L419   |
| LAMC3     | 9 | 132906928 | 132906928 | Missense | SNP | G | A | BRC16   | NM_006059.3     | p.G456D  |
| RAPGEF1   | 9 | 133491571 | 133491571 | Missense | SNP | G | T | BRC3    | NM_198679.2     | p.P422T  |
| SETX      | 9 | 134134869 | 134134869 | Missense | SNP | C | T | CSB8    | NM_015046.5     | p.R2414Q |
| TSC1      | 9 | 134761659 | 134761659 | Silent   | SNP | T | C | CSB20   | NM_000368.3     | p.R1093  |
| CEL       | 9 | 134929708 | 134929708 | Missense | SNP | T | A | CSB27   | NM_001807.3     | p.F58I   |
| ADAMTS13  | 9 | 135281234 | 135281234 | Missense | SNP | G | A | BRC11   | NM_139025.3     | p.E212K  |



|              |    |           |           |                            |     |      |         |         |                 |                                  |
|--------------|----|-----------|-----------|----------------------------|-----|------|---------|---------|-----------------|----------------------------------|
| COL5A1       | 9  | 136740445 | 136740445 | Missense                   | SNP | C    | G       | BRC12   | ENST00000371814 | p.Q119E                          |
| EHMT1        | 9  | 139830231 | 139830231 | Silent                     | SNP | C    | G       | BRC39   | NM_024757.1     | p.L1059                          |
| CACNA1B      | 9  | 139931555 | 139931555 | Missense                   | SNP | C    | T       | CSB22   | NM_000718.2     | p.P273S                          |
| ZMYND11      | 10 | 284307    | 284307    | Missense                   | SNP | C    | T       | BRC5    | NM_006624.3     | p.S380F                          |
| LARP5        | 10 | 872396    | 872396    | Missense                   | SNP | G    | T       | BRC35   | NM_015155.1     | p.Q233K                          |
| GTPBP4       | 10 | 1048488   | 1048488   | Missense                   | SNP | G    | C       | CSB1    | NM_012341.2     | p.E476D                          |
| LOC100129894 | 10 | 1324961   | 1324961   | Silent                     | SNP | G    | A       | BRC9    | XM_001718251.1  | p.S35                            |
| LOC728209    | 10 | 2240023   | 2240023   | Missense                   | SNP | C    | G       | BRC18   | XM_001126868.1  | p.I10M                           |
| AKR1CL2      | 10 | 4873992   | 4873992   | Silent                     | SNP | G    | C       | BRC44   | NM_001040177.1  | p.L232                           |
| NET1         | 10 | 5488190   | 5488190   | Silent                     | SNP | G    | C       | CSB1    | NM_001047160.1  | p.V446                           |
| PFKFB3       | 10 | 6285280   | 6285280   | Silent                     | SNP | G    | A       | CSB31   | NM_004566.1     | p.V17                            |
| PRKCQ        | 10 | 6523947   | 6523947   | Missense                   | SNP | C    | T       | CSB1    | NM_006257.2     | p.E584K                          |
| SFMBT2       | 10 | 7449734   | 7449734   | Missense                   | SNP | G    | A       | CSB29   | NM_001029880.1  | p.R107C                          |
| ITIH5        | 10 | 7662007   | 7662007   | Missense                   | SNP | T    | C       | CSB15   | NM_030569.1     | p.R379G                          |
| ATP5C1       | 10 | 7884806   | 7884806   | Missense                   | SNP | C    | G       | BRC5    | NM_001001973.1  | p.I291M                          |
| TAF3         | 10 | 8096665   | 8096665   | Missense                   | SNP | G    | A       | CSB16   | NM_031923.2     | p.C912Y                          |
| GATA3        | 10 | 8146064   | 8146064   | Missense                   | SNP | T    | A       | BRC18   | NM_001002295.1  | p.M294K<br>p.302in<br>Frame insl |
| GATA3        | 10 | 8146086   | 8146087   | In Frame Ins               | INS |      | 0 ATT   | CSB29   | NM_001002295.1  |                                  |
| GATA3        | 10 | 8151439   | 8151440   | Splice_Site                | DEL | CA   |         | 0 CSB7  | NM_001002295.1  | e4-2                             |
| GATA3        | 10 | 8151439   | 8151440   | Splice_Site<br>Frame Shift | DEL | CA   |         | 0 BRC21 | NM_001002295.1  | e4-2                             |
| GATA3        | 10 | 8151512   | 8151513   | Ins                        | INS |      | 0 T     | CSB29   | NM_001002295.1  | p.A333fs                         |
| GATA3        | 10 | 8155707   | 8155707   | Splice_Site<br>Frame Shift | SNP | G    |         | C CSB22 | NM_001002295.1  | e5-1                             |
| GATA3        | 10 | 8155724   | 8155724   | Ins<br>Frame Shift         | INS |      | 0 TATGA | BRC32   | NM_001002295.1  | p.K358fs                         |
| GATA3        | 10 | 8155880   | 8155880   | Ins                        | INS |      | 0 T     | BRC6    | NM_001002295.1  | p.P409fs                         |
| C10orf31     | 10 | 11398884  | 11398884  | RNA<br>Frame Shift         | SNP | G    |         | A BRC39 | XR_041927.1     | NULL                             |
| UPF2         | 10 | 12049411  | 12049411  | Del                        | DEL | G    |         | 0 CSB26 | NM_015542.2     | p.R668fs                         |
| SEC61A2      | 10 | 12239021  | 12239021  | Silent                     | SNP | C    | A       | BRC39   | NM_018144.1     | p.L242                           |
| SEC61A2      | 10 | 12243116  | 12243116  | Missense                   | SNP | C    | T       | BRC18   | NM_018144.1     | p.S386L                          |
| MCM10        | 10 | 13262500  | 13262500  | Missense                   | SNP | C    | A       | CSB2    | NM_182751.3     | p.L274M                          |
| PHYH         | 10 | 13376527  | 13376527  | Silent                     | SNP | C    | T       | CSB1    | NM_006214.1     | p.S107                           |
| FAM171A1     | 10 | 15295260  | 15295260  | Missense                   | SNP | C    | G       | CSB1    | NM_001010924.1  | p.R778P                          |
| LOC729195    | 10 | 19538360  | 19538360  | Silent                     | SNP | C    | T       | BRC50   | XM_001129637.2  | p.L552                           |
| MLLT10       | 10 | 22062023  | 22062026  | Splice_Site                | DEL | GTAA |         | 0 BRC33 | NM_004641.1     | e18+1                            |



|              |    |          |          |                    |     |      |   |         |                 |                     |
|--------------|----|----------|----------|--------------------|-----|------|---|---------|-----------------|---------------------|
| BMI1         | 10 | 22656983 | 22656983 | Missense           | SNP | G    | A | BRC31   | NM_005180.5     | p.D139N             |
| MYO3A        | 10 | 26486445 | 26486445 | Silent             | SNP | A    | T | BRC16   | NM_017433.4     | p.I998              |
| ANKRD26      | 10 | 27395472 | 27395472 | Missense           | SNP | C    | A | BRC35   | NM_014915.2     | p.A407S             |
| MASTL        | 10 | 27494387 | 27494387 | Missense           | SNP | A    | G | BRC33   | NM_032844.2     | p.T242A             |
| LOC220906    | 10 | 28853515 | 28853515 | Missense           | SNP | G    | A | BRC31   | XM_001716412.1  | p.H226Y             |
| WAC          | 10 | 28937273 | 28937273 | Nonsense           | SNP | C    | T | BRC18   | NM_016628.3     | p.Q358*             |
| NRP1         | 10 | 33521353 | 33521353 | Splice_Site        | SNP | C    | G | CSB1    | NM_003873.2     | e13-1               |
| PARD3        | 10 | 34666222 | 34666222 | Silent             | SNP | G    | A | BRC20   | NM_019619.2     | p.S852              |
| CUL2         | 10 | 35383400 | 35383400 | Missense           | SNP | C    | G | BRC44   | NM_003591.2     | p.D131H             |
| ANKRD30A     | 10 | 37473954 | 37473954 | Silent             | SNP | A    | G | CSB16   | NM_052997.2     | p.K417              |
| ANKRD30A     | 10 | 37476373 | 37476376 | Frame Shift<br>Del | DEL | ATAA |   | 0 BRC5  | NM_052997.2     | p.N454fs            |
| ZNF33A       | 10 | 38368420 | 38368420 | Nonsense           | SNP | C    | T | BRC29   | ENST00000265892 | p.Q68*              |
| CSGALNACT2   | 10 | 42991421 | 42991421 | Missense           | SNP | C    | A | CSB15   | NM_018590.3     | p.S424Y             |
| OR13A1       | 10 | 45119126 | 45119126 | Missense           | SNP | C    | G | BRC50   | NM_001004297.2  | p.G251R             |
| LOC100128244 | 10 | 45524271 | 45524271 | Silent             | SNP | C    | G | CSB8    | XM_001717633.1  | p.L72               |
| RBP3         | 10 | 48007873 | 48007873 | Missense           | SNP | G    | T | BRC35   | NM_002900.2     | p.P1004H            |
| GDF2         | 10 | 48034239 | 48034239 | Missense           | SNP | T    | G | CSB15   | NM_016204.1     | p.K212T             |
| WDFY4        | 10 | 49621123 | 49621123 | Silent             | SNP | C    | G | CSB1    | ENST00000325239 | p.L661              |
| WDFY4        | 10 | 49695367 | 49695367 | Silent             | SNP | C    | T | BRC39   | ENST00000374161 | p.L332              |
| LRRC18       | 10 | 49792151 | 49792151 | Missense           | SNP | C    | T | CSB22   | NM_001006939.3  | p.R19K              |
| C10orf53     | 10 | 50571899 | 50571899 | Silent             | SNP | G    | A | BRC50   | NM_182554.1     | p.V57               |
| FAM21A       | 10 | 51499357 | 51499357 | Missense           | SNP | G    | C | BRC11   | NM_001005751.1  | p.R57S              |
| A1CF         | 10 | 52243741 | 52243741 | Missense           | SNP | C    | G | CSB1    | NM_138932.2     | p.G410A             |
| PRKG1        | 10 | 53718720 | 53718720 | Missense           | SNP | G    | C | BRC17   | NM_006258.1     | p.G619A             |
| PCDH15       | 10 | 55251808 | 55251808 | Nonsense           | SNP | G    | T | BRC39   | NM_033056.1     | p.S1895*<br>p.F47in |
| TMEM26       | 10 | 62882705 | 62882707 | In Frame Del       | DEL | GAA  |   | 0 BRC49 | NM_178505.6     | Frame del           |
| ZNF365       | 10 | 63829297 | 63829297 | Nonsense           | SNP | C    | T | BRC33   | NM_014951.2     | p.R323*             |
| LRRTM3       | 10 | 68356885 | 68356885 | Missense           | SNP | C    | T | CSB1    | NM_178011.3     | p.R69C              |
| DNA2         | 10 | 69876061 | 69876061 | Missense           | SNP | C    | T | BRC16   | NM_001080449.1  | p.R438K             |
| CCAR1        | 10 | 70152281 | 70152281 | Missense           | SNP | G    | A | BRC50   | NM_018237.2     | p.G5E               |
| SUPV3L1      | 10 | 70628872 | 70628872 | Missense           | SNP | A    | G | CSB30   | NM_003171.3     | p.K404R             |
| HKDC1        | 10 | 70662838 | 70662838 | Silent             | SNP | G    | A | BRC39   | NM_025130.3     | p.K146              |
| NEUROG3      | 10 | 71002534 | 71002534 | Missense           | SNP | C    | T | CSB14   | NM_020999.2     | p.R91H              |
| H2AFY2       | 10 | 71521552 | 71521552 | Missense           | SNP | G    | A | BRC32   | NM_018649.2     | p.V105I             |

|                 |    |           |           |                    |     |   |   |        |                 |          |
|-----------------|----|-----------|-----------|--------------------|-----|---|---|--------|-----------------|----------|
| CDH23           | 10 | 73131959  | 73131959  | Missense           | SNP | G | A | CSB14  | NM_022124.4     | p.V858I  |
| SPOCK2          | 10 | 73500172  | 73500172  | Silent             | SNP | C | T | BRC31  | NM_014767.1     | p.V126   |
| CBARA1          | 10 | 73963518  | 73963518  | Missense           | SNP | C | G | CSB1   | NM_006077.2     | p.D177H  |
| NUDT13          | 10 | 74544165  | 74544165  | Silent             | SNP | A | G | BRC12  | NM_015901.4     | p.K12    |
| PPP3CB          | 10 | 74904686  | 74904686  | Missense           | SNP | C | G | BRC13  | NM_021132.1     | p.E174Q  |
| NDST2           | 10 | 75237147  | 75237147  | Splice_Site        | SNP | C | T | BRC41  | NM_003635.3     | e1+1     |
| MYST4           | 10 | 76273215  | 76273215  | Silent             | SNP | C | T | BRC20  | NM_012330.2     | p.V198   |
| MYST4           | 10 | 76450952  | 76450952  | Missense           | SNP | C | T | BRC44  | NM_012330.2     | p.S975F  |
| SFTPD           | 10 | 81687695  | 81687695  | Frame Shift<br>Del | DEL | C |   | 0 CSB1 | NM_003019.4     | p.E341fs |
| LRIT2           | 10 | 85972109  | 85972109  | Silent             | SNP | C | A | CSB14  | NM_001017924.2  | p.S400   |
| RGR             | 10 | 86002636  | 86002636  | Silent             | SNP | C | T | CSB1   | NM_002921.1     | p.F138   |
| GRID1           | 10 | 87352163  | 87352163  | Silent             | SNP | C | T | CSB20  | NM_017551.2     | p.A959   |
| LDB3            | 10 | 88429238  | 88429238  | Silent             | SNP | G | A | BRC41  | NM_007078.1     | p.L76    |
| ENSG00000200176 | 10 | 88639342  | 88639342  | RNA                | SNP | A | T | BRC36  | ENST00000363306 | NULL     |
| MMRN2           | 10 | 88693424  | 88693424  | Missense           | SNP | G | A | BRC51  | NM_024756.2     | p.P366L  |
| C10orf59        | 10 | 90112372  | 90112372  | Missense           | SNP | A | C | CSB2   | NM_001031709.1  | p.I206S  |
| ACTA2           | 10 | 90685101  | 90685101  | Silent             | SNP | G | T | BRC38  | NM_001613.1     | p.I331   |
| IFIT1L          | 10 | 91133239  | 91133239  | Silent             | SNP | C | T | CSB34  | NM_001010987.1  | p.H63    |
| KIF20B          | 10 | 91487981  | 91487981  | Missense           | SNP | C | G | BRC39  | NM_016195.2     | p.L1095V |
| KIF20B          | 10 | 91518106  | 91518106  | Missense           | SNP | C | T | CSB1   | NM_016195.2     | p.S1650F |
| RPP30           | 10 | 92624615  | 92624615  | Missense           | SNP | C | T | BRC39  | NM_001104546.1  | p.S31L   |
| IDE             | 10 | 94257869  | 94257869  | Missense           | SNP | G | T | BRC32  | NM_004969.2     | p.D378E  |
| LGI1            | 10 | 95546890  | 95546890  | Missense           | SNP | C | G | BRC13  | NM_005097.2     | p.F338L  |
| NOC3L           | 10 | 96102650  | 96102650  | Missense           | SNP | G | A | BRC39  | NM_022451.9     | p.S284F  |
| CYP2C19         | 10 | 96592682  | 96592682  | Nonsense           | SNP | G | T | BRC39  | NM_000769.1     | p.E354*  |
| C10orf129       | 10 | 96957047  | 96957047  | Missense           | SNP | G | A | BRC39  | NM_207321.2     | p.E11K   |
| SORBS1          | 10 | 97164576  | 97164576  | Missense           | SNP | C | T | BRC15  | NM_001034954.1  | p.V159I  |
| ZNF518          | 10 | 97908210  | 97908210  | Missense           | SNP | C | G | CSB1   | ENST00000371192 | p.S714C  |
| TM9SF3          | 10 | 98315135  | 98315135  | Missense           | SNP | C | T | CSB1   | NM_020123.3     | p.D113N  |
| SLIT1           | 10 | 98752583  | 98752583  | Missense           | SNP | G | C | CSB2   | NM_003061.2     | p.P1341R |
| SLIT1           | 10 | 98768370  | 98768370  | Missense           | SNP | T | G | CSB2   | NM_003061.2     | p.T978P  |
| LOC100128300    | 10 | 99619241  | 99619241  | Silent             | SNP | C | G | BRC47  | XM_001725350.1  | p.L87    |
| CRTAC1          | 10 | 99673094  | 99673094  | Missense           | SNP | C | A | CSB1   | NM_018058.4     | p.D159Y  |
| ABCC2           | 10 | 101546989 | 101546989 | Missense           | SNP | C | T | CSB29  | NM_000392.3     | p.R260W  |

|              |    |           |           |                    |     |   |   |         |                 |          |
|--------------|----|-----------|-----------|--------------------|-----|---|---|---------|-----------------|----------|
| DNMBP        | 10 | 101705356 | 101705356 | Missense           | SNP | G | A | CSB6    | NM_015221.2     | p.S622F  |
| SEC31B       | 10 | 102238694 | 102238694 | Missense           | SNP | C | G | BRC18   | NM_015490.3     | p.E1067Q |
| C10orf2      | 10 | 102740682 | 102740682 | Silent             | SNP | G | C | CSB1    | NM_021830.3     | p.V553   |
| LZTS2        | 10 | 102752562 | 102752562 | Missense           | SNP | G | A | CSB1    | NM_032429.1     | p.E93K   |
| NPM3         | 10 | 103532621 | 103532621 | Missense           | SNP | C | T | BRC50   | NM_006993.2     | p.E57K   |
| GBF1         | 10 | 104101078 | 104101078 | Missense           | SNP | C | T | BRC50   | NM_004193.1     | p.T124M  |
| PSD          | 10 | 104153711 | 104153711 | Missense           | SNP | C | T | BRC38   | NM_002779.3     | p.E908K  |
| PSD          | 10 | 104161898 | 104161898 | Missense           | SNP | G | C | CSB1    | NM_002779.3     | p.L609V  |
| PSD          | 10 | 104166750 | 104166750 | Silent             | SNP | G | A | CSB10   | NM_002779.3     | p.G12    |
| CYP17A1      | 10 | 104582846 | 104582846 | Missense           | SNP | G | A | CSB1    | NM_000102.3     | p.S288L  |
| AS3MT        | 10 | 104619917 | 104619917 | Frame Shift<br>Del | DEL | C |   | 0 BRC31 | NM_020682.3     | p.R44fs  |
| PDCD11       | 10 | 105159489 | 105159489 | Missense           | SNP | C | T | BRC39   | NM_014976.1     | p.T305M  |
| NEURL        | 10 | 105321490 | 105321490 | Missense           | SNP | C | A | BRC41   | NM_004210.4     | p.F190L  |
| SLK          | 10 | 105748961 | 105748961 | Missense           | SNP | A | G | BRC36   | NM_014720.2     | p.M228V  |
| SORCS3       | 10 | 106966794 | 106966794 | Silent             | SNP | G | A | BRC50   | NM_014978.1     | p.A886   |
| LOC100128304 | 10 | 109664761 | 109664761 | Silent             | SNP | G | A | BRC9    | XM_001718321.1  | p.P135   |
| SMC3         | 10 | 112350187 | 112350187 | Missense           | SNP | G | A | CSB1    | NM_005445.3     | p.E810K  |
| GPAM         | 10 | 113927780 | 113927780 | Missense           | SNP | G | A | BRC29   | NM_020918.4     | p.P84L   |
| CASP7        | 10 | 115441768 | 115441768 | Missense           | SNP | G | C | CSB9    | NM_033338.3     | p.K16N   |
| C10orf81     | 10 | 115527282 | 115527282 | Missense           | SNP | G | C | BRC11   | ENST00000369310 | p.D431H  |
| FAM160B1     | 10 | 116611047 | 116611047 | Missense           | SNP | G | A | CSB1    | NM_020940.1     | p.R719K  |
| PNLIPRP1     | 10 | 118341311 | 118341311 | Missense           | SNP | G | A | CSB12   | NM_006229.2     | p.D30N   |
| PNLIPRP1     | 10 | 118344276 | 118344276 | Missense           | SNP | G | C | CSB1    | NM_006229.2     | p.W125C  |
| PNLIPRP2     | 10 | 118394572 | 118394572 | Missense           | SNP | G | A | BRC32   | ENST00000298771 | p.V461I  |
| VAX1         | 10 | 118881785 | 118881785 | Silent             | SNP | C | T | BRC39   | NM_199131.1     | p.K162   |
| PDZD8        | 10 | 119033303 | 119033303 | Silent             | SNP | G | A | BRC18   | NM_173791.3     | p.N977   |
| EIF3A        | 10 | 120800083 | 120800083 | Missense           | SNP | T | C | CSB16   | NM_003750.2     | p.T805A  |
| SFXN4        | 10 | 120915047 | 120915047 | Missense           | SNP | C | T | CSB1    | NM_213649.1     | p.E35K   |
| INPP5F       | 10 | 121500656 | 121500656 | Missense           | SNP | C | T | BRC47   | NM_014937.2     | p.S59L   |
| TACC2        | 10 | 124003532 | 124003532 | Missense           | SNP | G | A | BRC28   | NM_206862.2     | p.E2940K |
| HTRA1        | 10 | 124256240 | 124256240 | Missense           | SNP | G | A | BRC47   | NM_002775.4     | p.R274Q  |
| DMBT1        | 10 | 124349596 | 124349596 | Missense           | SNP | C | G | BRC39   | NM_007329.2     | p.P1103A |
| HMX3         | 10 | 124886608 | 124886608 | Missense           | SNP | A | C | BRC41   | NM_001105574.1  | p.T149P  |
| BUB3         | 10 | 124907318 | 124907318 | Missense           | SNP | G | A | CSB1    | NM_004725.2     | p.D117N  |

|                     |    |           |           |             |     |         |   |       |                 |          |
|---------------------|----|-----------|-----------|-------------|-----|---------|---|-------|-----------------|----------|
| GPR26               | 10 | 125416420 | 125416420 | Silent      | SNP | C       | T | BRC41 | NM_153442.3     | p.F169   |
| OAT                 | 10 | 126087299 | 126087299 | Splice_Site | SNP | C       | T | CSB16 | NM_000274.2     | e2+1     |
| METTL10             | 10 | 126444060 | 126444060 | Missense    | SNP | C       | G | BRC41 | NM_212554.2     | p.K169N  |
| ZRANB1              | 10 | 126652898 | 126652898 | Silent      | SNP | T       | C | BRC28 | NM_017580.2     | p.Y456   |
| LOC728065           | 10 | 128575298 | 128575298 | Silent      | SNP | C       | T | BRC20 | XM_001126459.1  | p.G2     |
| C10orf141           | 10 | 128863607 | 128863607 | Missense    | SNP | C       | T | BRC36 | NM_001039762.2  | p.R348Q  |
| LOC387720           | 10 | 129423948 | 129423948 | RNA         | SNP | C       | T | BRC11 | XR_039803.1     | NULL     |
| MKI67               | 10 | 129797414 | 129797414 | Missense    | SNP | C       | T | BRC31 | NM_002417.1     | p.E894K  |
| DPYSL4              | 10 | 133854282 | 133854282 | Silent      | SNP | C       | T | CSB34 | NM_006426.2     | p.D27    |
| LRRC27              | 10 | 134019312 | 134019312 | Missense    | SNP | G       | C | BRC31 | NM_030626.1     | p.E368Q  |
| INPP5A              | 10 | 134445424 | 134445424 | Missense    | SNP | G       | T | CSB22 | NM_005539.3     | p.V410F  |
| KNDC1               | 10 | 134865315 | 134865315 | Missense    | SNP | G       | A | BRC16 | NM_152643.6     | p.G1104R |
|                     |    |           |           |             |     | GGGTCA  |   |       |                 |          |
|                     |    |           |           |             |     | AC      |   |       |                 |          |
|                     |    |           |           | Frame Shift |     | AACTCTG |   |       |                 |          |
| ATHL1               | 11 | 283193    | 283208    | Del         | DEL | T       | 0 | BRC31 | NM_025092.4     | p.V258fs |
| PHRF1               | 11 | 598188    | 598188    | Missense    | SNP | C       | A | BRC35 | NM_020901.2     | p.A911D  |
| MUPCDH              | 11 | 611194    | 611194    | Silent      | SNP | C       | T | CSB1  | NM_021924.3     | p.L225   |
| DEAF1               | 11 | 674921    | 674921    | Missense    | SNP | C       | T | CSB19 | NM_021008.2     | p.A283T  |
| TSPAN4              | 11 | 852658    | 852658    | Missense    | SNP | A       | G | BRC38 | NM_001025234.1  | p.I58V   |
| MUC5B               | 11 | 1219076   | 1219076   | Missense    | SNP | G       | A | BRC16 | NM_002458.1     | p.E1467K |
| TOLLIP              | 11 | 1268038   | 1268038   | Missense    | SNP | C       | A | CSB21 | NM_019009.2     | p.D121Y  |
| ENSG0000020575<br>1 | 11 | 1954030   | 1954030   | Missense    | SNP | C       | T | BRC31 | ENST00000381512 | p.S212F  |
| KCNQ1               | 11 | 2549182   | 2549182   | Missense    | SNP | G       | C | BRC17 | NM_000218.2     | p.G219A  |
| ZNF195              | 11 | 3337560   | 3337560   | Missense    | SNP | G       | C | BRC7  | NM_007152.1     | p.I346M  |
| ART1                | 11 | 3637426   | 3637426   | Missense    | SNP | C       | G | CSB1  | NM_004314.2     | p.S34C   |
| OR52M1              | 11 | 4523188   | 4523188   | Missense    | SNP | C       | G | CSB2  | NM_001004137.1  | p.F64L   |
| OR51F2              | 11 | 4799316   | 4799316   | Missense    | SNP | C       | G | BRC48 | NM_001004753.1  | p.S42C   |
| OR51G2              | 11 | 4893168   | 4893168   | Missense    | SNP | G       | T | BRC35 | NM_001005238.1  | p.A101D  |
| OR51B5              | 11 | 5320515   | 5320515   | Silent      | SNP | G       | A | CSB1  | NM_001005567.1  | p.L272   |
| OR51B5              | 11 | 5320762   | 5320762   | Missense    | SNP | G       | T | CSB3  | NM_001005567.1  | p.T190N  |
| OR51B5              | 11 | 5321053   | 5321053   | Missense    | SNP | G       | A | CSB1  | NM_001005567.1  | p.A93V   |
| OR51J1              | 11 | 5381061   | 5381061   | Missense    | SNP | A       | T | BRC41 | ENST00000332043 | p.Y220F  |
| OR52H1              | 11 | 5522945   | 5522945   | Missense    | SNP | C       | G | BRC50 | NM_001005289.1  | p.D129H  |
| TRIM6-TRIM34        | 11 | 5610071   | 5610071   | Silent      | SNP | G       | T | BRC29 | NM_001003819.2  | p.G332   |

|                |    |          |          |             |     |   |   |       |                 |          |  |
|----------------|----|----------|----------|-------------|-----|---|---|-------|-----------------|----------|--|
| ENSG0000018090 |    |          |          |             |     |   |   |       |                 |          |  |
| 9              | 11 | 6130340  | 6130340  | Missense    | SNP | G | C | BRC51 | ENST00000316506 | p.L19V   |  |
| CNGA4          | 11 | 6217952  | 6217952  | Missense    | SNP | G | A | CSB1  | NM_001037329.2  | p.D118N  |  |
| APBB1          | 11 | 6381136  | 6381136  | Silent      | SNP | A | T | CSB2  | NM_001164.2     | p.A343   |  |
| DCHS1          | 11 | 6604610  | 6604610  | Missense    | SNP | T | G | BRC44 | NM_003737.2     | p.E2079A |  |
| DCHS1          | 11 | 6610077  | 6610077  | Missense    | SNP | T | A | CSB31 | NM_003737.2     | p.E1081V |  |
| OR10A2         | 11 | 6847815  | 6847815  | Missense    | SNP | C | T | CSB22 | NM_001004460.1  | p.A85V   |  |
| NLRP10         | 11 | 7938805  | 7938805  | Silent      | SNP | G | T | BRC48 | NM_176821.3     | p.V310   |  |
| IPO7           | 11 | 9406722  | 9406722  | Missense    | SNP | C | A | CSB1  | NM_006391.2     | p.F465L  |  |
| IPO7           | 11 | 9407822  | 9407822  | Silent      | SNP | C | T | BRC39 | NM_006391.2     | p.I539   |  |
| DKK3           | 11 | 11976903 | 11976903 | Splice_Site | SNP | C | T | CSB1  | NM_001018057.1  | e3-1     |  |
| INSC           | 11 | 15090598 | 15090598 | Missense    | SNP | C | T | CSB1  | NM_001031853.3  | p.R3W    |  |
| USH1C          | 11 | 17504557 | 17504557 | Missense    | SNP | C | T | BRC31 | NM_153676.3     | p.R196Q  |  |
| OTOG           | 11 | 17613309 | 17613309 | Silent      | SNP | C | T | BRC47 | XM_291816.1     | p.C2576  |  |
| MRGPRX1        | 11 | 18912064 | 18912064 | Missense    | SNP | G | C | BRC39 | NM_147199.3     | p.Q282E  |  |
| NAV2           | 11 | 19912087 | 19912087 | Missense    | SNP | G | C | CSB16 | NM_182964.1     | p.G597A  |  |
| LOC100130160   | 11 | 21262093 | 21262093 | Missense    | SNP | G | A | BRC41 | XM_001722925.1  | p.G66D   |  |
| GAS2           | 11 | 22704457 | 22704457 | Missense    | SNP | C | G | CSB1  | NM_005256.1     | p.S104W  |  |
| ANO3           | 11 | 26638525 | 26638525 | Silent      | SNP | A | G | BRC44 | NM_031418.2     | p.Q968   |  |
| LGR4           | 11 | 27346281 | 27346281 | Silent      | SNP | C | T | BRC47 | NM_018490.2     | p.L855   |  |
| BDNF           | 11 | 27636695 | 27636695 | Missense    | SNP | C | T | BRC36 | NM_170734.1     | p.R13K   |  |
| DCDC1          | 11 | 31306361 | 31306361 | Nonsense    | SNP | G | A | CSB1  | NM_181807.2     | p.Q15*   |  |
| ELP4           | 11 | 31610340 | 31610340 | Missense    | SNP | A | G | BRC8  | NM_019040.3     | p.K247E  |  |
| WT1            | 11 | 32394663 | 32394663 | Splice_Site | SNP | C | G | CSB24 | NM_024426.3     | e5-1     |  |
| TCP11L1        | 11 | 33035358 | 33035358 | Splice_Site | SNP | G | A | BRC47 | NM_018393.1     | e3+1     |  |
| CAPRN1         | 11 | 34067526 | 34067526 | Missense    | SNP | G | C | CSB1  | NM_005898.4     | p.E414Q  |  |
| SLC1A2         | 11 | 35259055 | 35259055 | Silent      | SNP | G | C | CSB1  | NM_004171.3     | p.L452   |  |
| RAG1           | 11 | 36552994 | 36552994 | Missense    | SNP | T | A | CSB22 | NM_000448.2     | p.W522R  |  |
| ACCS           | 11 | 44056034 | 44056034 | Missense    | SNP | G | A | BRC13 | NM_032592.1     | p.E240K  |  |
| ACCS           | 11 | 44056049 | 44056049 | Splice_Site | SNP | G | T | BRC29 | NM_032592.1     | e7+1     |  |
| ALX4           | 11 | 44253635 | 44253635 | Missense    | SNP | C | T | BRC3  | NM_021926.2     | p.D206N  |  |
| CHRM4          | 11 | 46363259 | 46363259 | Silent      | SNP | G | A | BRC41 | NM_000741.2     | p.I475   |  |
| MYBPC3         | 11 | 47327911 | 47327911 | Missense    | SNP | C | T | CSB15 | NM_000256.3     | p.R215H  |  |
| CUGBP1         | 11 | 47460824 | 47460824 | Missense    | SNP | G | A | CSB8  | NM_001025596.1  | p.A229V  |  |
| LOC120824      | 11 | 48953777 | 48953777 | Missense    | SNP | G | C | BRC26 | XM_062300.1     | p.P403R  |  |

|                 |    |          |          |          |     |      |   |       |                 |          |
|-----------------|----|----------|----------|----------|-----|------|---|-------|-----------------|----------|
| OR4C46          | 11 | 51371900 | 51371900 | Missense | SNP | C    | G | BRC24 | NM_001004703.1  | p.L15V   |
| ENSG00000181943 | 11 | 55015876 | 55015876 | Silent   | SNP | C    | T | BRC39 | ENST00000314657 | p.V194   |
| OR4C15          | 11 | 55079295 | 55079295 | Missense | SNP | C    | G | BRC21 | NM_001001920.1  | p.R313G  |
| SPRYD5          | 11 | 55415305 | 55415305 | Missense | SNP | G    | T | BRC37 | NM_032681.3     | p.C168F  |
| OR5I1           | 11 | 55459862 | 55459865 | Del      | DEL | ATTA | 0 | BRC44 | NM_006637.1     | p.I196fs |
| OR7E5P          | 11 | 55503838 | 55503838 | Silent   | SNP | C    | T | BRC44 | ENST00000399170 | p.L65    |
| OR5F1           | 11 | 55518216 | 55518216 | Silent   | SNP | C    | T | BRC39 | NM_003697.1     | p.L154   |
| OR8I2           | 11 | 55617390 | 55617390 | Missense | SNP | G    | A | BRC16 | NM_001003750.1  | p.V11I   |
| OR8H2           | 11 | 55629521 | 55629521 | Missense | SNP | G    | A | BRC7  | NM_001005200.1  | p.A143T  |
| OR8J3           | 11 | 55661114 | 55661114 | Silent   | SNP | G    | A | CSB1  | NM_001004064.1  | p.F219   |
| OR5R1           | 11 | 55941805 | 55941805 | Silent   | SNP | G    | A | BRC12 | NM_001004744.1  | p.T160   |
| TNKS1BP1        | 11 | 56826514 | 56826514 | Missense | SNP | T    | G | BRC15 | NM_033396.2     | p.I1560L |
| SLC43A3         | 11 | 56939136 | 56939136 | Missense | SNP | C    | G | CSB1  | NM_014096.2     | p.Q263H  |
| OR5B2           | 11 | 57946504 | 57946504 | Missense | SNP | G    | T | CSB22 | NM_001005566.1  | p.D269E  |
| ENSG00000204989 | 11 | 59016177 | 59016177 | Missense | SNP | G    | T | CSB21 | ENST00000378245 | p.Q124H  |
| PATL1           | 11 | 59180639 | 59180639 | Missense | SNP | G    | A | BRC35 | NM_152716.2     | p.P68L   |
| VWCE            | 11 | 60789076 | 60789076 | Silent   | SNP | G    | A | CSB1  | NM_152718.2     | p.Y689   |
| SYT7            | 11 | 61042759 | 61042759 | Silent   | SNP | G    | A | BRC26 | NM_004200.2     | p.S376   |
| SYT7            | 11 | 61080243 | 61080243 | Missense | SNP | C    | T | BRC44 | NM_004200.2     | p.R15H   |
| DAGLA           | 11 | 61244257 | 61244257 | Silent   | SNP | C    | T | BRC5  | NM_006133.1     | p.L18    |
| ENSG00000200898 | 11 | 61462019 | 61462019 | RNA      | SNP | A    | C | BRC17 | ENST00000364028 | NULL     |
| INCENP          | 11 | 61654580 | 61654580 | Silent   | SNP | G    | A | CSB1  | NM_001040694.1  | p.A335   |
| AHNAK           | 11 | 62043662 | 62043662 | Missense | SNP | G    | T | BRC16 | NM_001620.1     | p.P4935T |
| AHNAK           | 11 | 62048414 | 62048414 | Missense | SNP | G    | A | CSB1  | NM_001620.1     | p.R3351C |
| AHNAK           | 11 | 62050577 | 62050577 | Missense | SNP | G    | C | CSB1  | NM_001620.1     | p.Q2630E |
| INTS5           | 11 | 62171900 | 62171900 | Missense | SNP | C    | T | BRC50 | NM_030628.1     | p.G743E  |
| INTS5           | 11 | 62172303 | 62172303 | Missense | SNP | C    | G | BRC50 | NM_030628.1     | p.D609H  |
| INTS5           | 11 | 62177220 | 62177220 | Silent   | SNP | G    | A | BRC31 | NM_030628.1     | p.L26    |
| C11orf48        | 11 | 62187302 | 62187302 | Missense | SNP | C    | G | BRC31 | NM_024099.3     | p.R248T  |
| SLC22A10        | 11 | 62828250 | 62828250 | Missense | SNP | C    | G | BRC18 | NM_001039752.3  | p.I460M  |
| FLRT1           | 11 | 63640684 | 63640684 | Silent   | SNP | C    | T | BRC7  | NM_013280.4     | p.I123   |
| NUDT22          | 11 | 63750902 | 63750902 | Missense | SNP | C    | G | BRC39 | NM_032344.1     | p.L68V   |
| SLC22A12        | 11 | 64115780 | 64115780 | Missense | SNP | C    | T | CSB1  | NM_144585.2     | p.A59V   |

|            |    |          |          |              |     |        |   |   |       |                 |            |
|------------|----|----------|----------|--------------|-----|--------|---|---|-------|-----------------|------------|
| C11orf85   | 11 | 64464659 | 64464659 | Missense     | SNP | C      | T |   | BRC31 | NM_001037225.1  | p.R170K    |
| SAC3D1     | 11 | 64568690 | 64568690 | Missense     | SNP | G      | A |   | BRC41 | NM_013299.3     | p.S331N    |
| NCRNA00084 | 11 | 64962411 | 64962414 | RNA          | DEL | TATT   |   | 0 | BRC44 | NR_002802.1     | NULL       |
| MALAT1     | 11 | 65024869 | 65024872 | RNA          | DEL | TTTA   |   | 0 | BRC31 | NR_002819.2     | NULL       |
| MALAT1     | 11 | 65024891 | 65024893 | RNA          | DEL | GGG    |   | 0 | BRC4  | NR_002819.2     | NULL       |
| MALAT1     | 11 | 65025671 | 65025673 | RNA          | DEL | AGA    |   | 0 | BRC5  | NR_002819.2     | NULL       |
| MALAT1     | 11 | 65026021 | 65026021 | RNA          | SNP | A      | C |   | BRC51 | NR_002819.2     | NULL       |
| LTBP3      | 11 | 65076065 | 65076065 | Missense     | SNP | C      | G |   | BRC47 | NM_021070.1     | p.E495D    |
| PCNXL3     | 11 | 65159415 | 65159415 | Missense     | SNP | C      | T |   | BRC19 | NM_032223.2     | p.R1702C   |
|            |    |          |          |              |     | GCGGCG |   |   |       |                 |            |
|            |    |          |          |              |     | CA     |   |   |       |                 |            |
|            |    |          |          |              |     | TGCAGC |   |   |       |                 |            |
|            |    |          |          |              |     | AG     |   |   |       |                 | p.LERLLHAP |
|            |    |          |          |              |     | CCGCTC |   |   |       |                 | 66in Frame |
| FIBP       | 11 | 65412045 | 65412068 | In Frame Del | DEL | GA     |   | 0 | CSB28 | NM_198897.4     | del        |
| SF3B2      | 11 | 65583861 | 65583861 | Silent       | SNP | C      | T |   | BRC37 | NM_006842.2     | p.H478     |
| SLC29A2    | 11 | 65891855 | 65891855 | Silent       | SNP | G      | T |   | BRC13 | NM_001532.2     | p.L204     |
| RBM14      | 11 | 66149377 | 66149377 | Missense     | SNP | C      | T |   | BRC29 | NM_006328.3     | p.S485F    |
| PC         | 11 | 66373006 | 66373006 | Silent       | SNP | C      | T |   | CSB21 | NM_000920.3     | p.K1159    |
| LRFN4      | 11 | 66381948 | 66381948 | Silent       | SNP | C      | T |   | CSB31 | NM_024036.4     | p.L53      |
| LRFN4      | 11 | 66382262 | 66382262 | Silent       | SNP | C      | T |   | CSB31 | NM_024036.4     | p.L157     |
| LRFN4      | 11 | 66383712 | 66383712 | Silent       | SNP | C      | T |   | CSB31 | NM_024036.4     | p.L460     |
| SSH3       | 11 | 66828902 | 66828902 | Missense     | SNP | G      | C |   | BRC39 | NM_017857.2     | p.E63Q     |
|            |    |          |          | Nonstop      |     |        |   |   |       |                 |            |
| SSH3       | 11 | 66835933 | 66835933 | Mutation     | SNP | G      | C |   | BRC31 | NM_017857.2     | p.*660S    |
| RAD9A      | 11 | 66919782 | 66919782 | Silent       | SNP | C      | T |   | CSB1  | NM_004584.2     | p.L157     |
| RAD9A      | 11 | 66920319 | 66920319 | Silent       | SNP | C      | T |   | CSB1  | NM_004584.2     | p.I248     |
| C11orf72   | 11 | 67128782 | 67128782 | Missense     | SNP | A      | C |   | CSB2  | ENST00000333139 | p.I112R    |
| FADD       | 11 | 69730112 | 69730112 | Missense     | SNP | A      | T |   | CSB26 | NM_003824.3     | p.N171I    |
| SHANK2     | 11 | 70011077 | 70011077 | Nonsense     | SNP | G      | C |   | CSB1  | NM_012309.1     | p.S395*    |
| SHANK2     | 11 | 70014128 | 70014128 | Missense     | SNP | G      | A |   | CSB22 | NM_012309.1     | p.R223C    |
| SHANK2     | 11 | 70507681 | 70507681 | Nonsense     | SNP | G      | A |   | BRC39 | ENST00000338508 | p.Q85*     |
| INPPL1     | 11 | 71625968 | 71625968 | Missense     | SNP | C      | T |   | CSB1  | NM_001567.3     | p.S1011F   |
| ARAP1      | 11 | 72084492 | 72084492 | Silent       | SNP | C      | T |   | CSB16 | NM_001040118.2  | p.T1113    |
| RELT       | 11 | 72783369 | 72783369 | Missense     | SNP | C      | T |   | BRC39 | NM_032871.3     | p.P330S    |
|            |    |          |          | Frame Shift  |     |        |   |   |       |                 |            |
| XRRA1      | 11 | 74316096 | 74316097 | Del          | DEL | AA     |   | 0 | CSB19 | NM_182969.1     | p.F162fs   |
| PRKRIR     | 11 | 75740620 | 75740620 | Missense     | SNP | G      | C |   | CSB1  | NM_004705.2     | p.L408V    |



|                     |    |           |           |                     |     |                 |   |         |                 |          |
|---------------------|----|-----------|-----------|---------------------|-----|-----------------|---|---------|-----------------|----------|
| C11orf30            | 11 | 75840639  | 75840639  | Missense            | SNP | A               | G | CSB7    | NM_020193.3     | p.K54E   |
| ACER3               | 11 | 76347670  | 76347670  | Splice_Site         | SNP | G               | A | BRC44   | NM_018367.5     | e3-1     |
| MYO7A               | 11 | 76546996  | 76546996  | Missense            | SNP | G               | A | BRC18   | NM_000260.3     | p.R292Q  |
| KCTD21              | 11 | 77562864  | 77562864  | Missense            | SNP | C               | T | CSB1    | NM_001029859.1  | p.E129K  |
| GAB2                | 11 | 77610397  | 77610397  | Missense            | SNP | C               | G | BRC44   | NM_080491.2     | p.D579H  |
| ODZ4                | 11 | 78058842  | 78058842  | Nonsense            | SNP | G               | A | BRC47   | NM_001098816.2  | p.R1404* |
| ODZ4                | 11 | 78292128  | 78292128  | Silent              | SNP | C               | T | BRC8    | ENST00000278550 | p.A194   |
| PRCP                | 11 | 82227202  | 82227202  | Missense            | SNP | G               | C | CSB1    | NM_199418.2     | p.H404Q  |
| DLG2                | 11 | 84543283  | 84543283  | Missense            | SNP | G               | C | BRC39   | ENST00000376104 | p.Q83E   |
| SYTL2               | 11 | 85113138  | 85113138  | Missense            | SNP | T               | G | CSB16   | NM_206927.3     | p.K670N  |
| CCDC83              | 11 | 85301348  | 85301358  | Frame Shift<br>Del  | DEL | TGCTACA<br>TTCC |   | 0 BRC41 | NM_173556.3     | p.L269fs |
| PRSS23              | 11 | 86196541  | 86196541  | Missense            | SNP | C               | G | BRC44   | NM_007173.4     | p.H70D   |
| TMEM135             | 11 | 86460290  | 86460290  | Missense            | SNP | T               | C | CSB3    | NM_022918.2     | p.I116T  |
| TYR                 | 11 | 88551015  | 88551015  | Silent              | SNP | C               | T | BRC36   | NM_000372.4     | p.S82    |
| FAT3                | 11 | 91725470  | 91725470  | Missense            | SNP | G               | T | BRC44   | NM_001008781.2  | p.A182S  |
| KIAA1731            | 11 | 93102306  | 93102306  | Missense            | SNP | C               | T | BRC39   | ENST00000344196 | p.S634L  |
| MRE11A              | 11 | 93802760  | 93802760  | Missense            | SNP | G               | C | CSB1    | NM_005591.3     | p.Q679E  |
| ENSG0000020114<br>9 | 11 | 94896900  | 94896900  | RNA                 | SNP | G               | A | BRC20   | ENST00000364279 | NULL     |
| CCDC82              | 11 | 95756837  | 95756837  | Missense<br>Nonstop | SNP | C               | G | BRC50   | NM_024725.3     | p.Q241H  |
| YAP1                | 11 | 101605881 | 101605881 | Mutation            | SNP | G               | C | CSB1    | NM_006106.1     | p.*455Y  |
| MMP20               | 11 | 101992936 | 101992936 | Missense            | SNP | C               | T | BRC50   | NM_004771.3     | p.G64E   |
| MMP10               | 11 | 102148852 | 102148852 | Missense            | SNP | C               | T | BRC47   | NM_002425.1     | p.D388N  |
| DYNC2H1             | 11 | 102490090 | 102490090 | Missense            | SNP | A               | T | BRC20   | NM_001080463.1  | p.S139C  |
| DYNC2H1             | 11 | 102490166 | 102490166 | Missense            | SNP | A               | G | BRC30   | NM_001080463.1  | p.D164G  |
| DYNC2H1             | 11 | 102560955 | 102560955 | Missense            | SNP | C               | G | BRC30   | NM_001080463.1  | p.L2200V |
| CASP1               | 11 | 104410366 | 104410366 | Missense            | SNP | C               | G | CSB1    | NM_033292.3     | p.G18A   |
| GRIA4               | 11 | 105128987 | 105128987 | Missense            | SNP | G               | C | CSB1    | NM_000829.3     | p.L106F  |
| GRIA4               | 11 | 105300447 | 105300447 | Missense            | SNP | A               | T | BRC7    | NM_000829.3     | p.Q530L  |
| KIAA1826            | 11 | 105385516 | 105385516 | Missense            | SNP | C               | G | BRC13   | NM_032424.1     | p.E332Q  |
| CUL5                | 11 | 107454155 | 107454155 | Missense            | SNP | G               | C | BRC11   | NM_003478.3     | p.E386Q  |
| ENSG0000020016<br>8 | 11 | 110416119 | 110416119 | RNA                 | SNP | G               | A | BRC44   | ENST00000363298 | NULL     |
| C11orf53            | 11 | 110661915 | 110661915 | Missense            | SNP | C               | T | CSB7    | NM_198498.1     | p.H213Y  |
| TTC12               | 11 | 112699930 | 112699930 | Missense            | SNP | C               | A | BRC41   | NM_017868.3     | p.A76E   |



|              |    |           |           |             |     |   |   |       |                |          |
|--------------|----|-----------|-----------|-------------|-----|---|---|-------|----------------|----------|
| USP28        | 11 | 113180909 | 113180909 | Nonsense    | SNP | G | A | BRC18 | NM_020886.2    | p.R824*  |
| HTR3B        | 11 | 113308944 | 113308944 | Silent      | SNP | T | C | BRC21 | NM_006028.3    | p.S205   |
| SIDT2        | 11 | 116569110 | 116569110 | Missense    | SNP | G | A | BRC18 | NM_001040455.1 | p.D713N  |
| CEP164       | 11 | 116786792 | 116786792 | Nonsense    | SNP | G | T | BRC8  | NM_014956.4    | p.E1379* |
| DSCAML1      | 11 | 116879942 | 116879942 | Silent      | SNP | G | A | BRC30 | NM_020693.2    | p.S789   |
| TMPRSS4      | 11 | 117487746 | 117487746 | Missense    | SNP | A | G | BRC47 | NM_019894.1    | p.I222V  |
| UBE4A        | 11 | 117751124 | 117751124 | Nonsense    | SNP | G | T | CSB8  | NM_004788.2    | p.E481*  |
| MLL          | 11 | 117881697 | 117881697 | Missense    | SNP | T | C | CSB34 | NM_005933.2    | p.S3291P |
| PHLDB1       | 11 | 118004149 | 118004149 | Missense    | SNP | G | A | BRC20 | NM_015157.1    | p.R467Q  |
| HYOU1        | 11 | 118423921 | 118423921 | Missense    | SNP | C | T | CSB1  | NM_006389.1    | p.E820K  |
| DPAGT1       | 11 | 118474397 | 118474397 | Silent      | SNP | C | T | CSB24 | NM_001382.3    | p.R218   |
| CBL          | 11 | 118653723 | 118653723 | Missense    | SNP | T | G | BRC7  | NM_005188.2    | p.L352V  |
| PVRL1        | 11 | 119014083 | 119014083 | Missense    | SNP | G | T | CSB6  | NM_203285.4    | p.L438M  |
| LOC729173    | 11 | 119545045 | 119545045 | Missense    | SNP | G | A | BRC32 | XM_001129552.2 | p.D28N   |
| POU2F3       | 11 | 119622394 | 119622394 | Missense    | SNP | G | A | BRC39 | NM_014352.2    | p.D19N   |
| TECTA        | 11 | 120489057 | 120489057 | Missense    | SNP | G | A | BRC9  | NM_005422.2    | p.E185K  |
| HSPA8        | 11 | 122436176 | 122436176 | Missense    | SNP | T | C | CSB23 | NM_006597.3    | p.N141S  |
| OR10G8       | 11 | 123406199 | 123406199 | Silent      | SNP | C | T | BRC13 | NM_001004464.1 | p.I220   |
| OR8G2        | 11 | 123601404 | 123601404 | Missense    | SNP | G | C | CSB1  | NM_001007249.1 | p.G266A  |
| SIAE         | 11 | 124014971 | 124014971 | Missense    | SNP | T | A | BRC51 | NM_170601.3    | p.L323F  |
| ROBO3        | 11 | 124253748 | 124253748 | Missense    | SNP | A | G | BRC32 | NM_022370.2    | p.S1127G |
| ROBO4        | 11 | 124261843 | 124261843 | Missense    | SNP | C | A | BRC39 | NM_019055.5    | p.D841Y  |
| HEPACAM      | 11 | 124297507 | 124297507 | Missense    | SNP | A | T | CSB2  | NM_152722.4    | p.I312N  |
| KIRREL3      | 11 | 125820155 | 125820155 | Missense    | SNP | C | A | BRC51 | NM_032531.2    | p.G394V  |
| KIRREL3      | 11 | 125838410 | 125838410 | Silent      | SNP | G | A | CSB31 | NM_032531.2    | p.T198   |
| KCNJ5        | 11 | 128291753 | 128291753 | Missense    | SNP | G | C | BRC31 | NM_000890.3    | p.G393R  |
| LOC100131487 | 11 | 128312226 | 128312226 | Missense    | SNP | A | G | BRC49 | XM_001726592.1 | p.M10V   |
| LOC399978    | 11 | 130221984 | 130221984 | RNA         | SNP | C | A | BRC39 | XR_041554.1    | NULL     |
| LOC646522    | 11 | 133159485 | 133159485 | RNA         | SNP | A | G | BRC40 | XR_040074.1    | NULL     |
| LOC646522    | 11 | 133185512 | 133185512 | RNA         | SNP | C | T | BRC24 | XR_040074.1    | NULL     |
| NCAPD3       | 11 | 133532202 | 133532202 | Splice_Site | SNP | T | C | BRC44 | NM_015261.2    | e32-2    |
| GLB1L3       | 11 | 133689442 | 133689442 | Missense    | SNP | C | G | BRC39 | NM_001080407.2 | p.S600C  |
| ADIPOR2      | 12 | 1765374   | 1765374   | Missense    | SNP | C | T | BRC5  | NM_024551.2    | p.H346Y  |
| DCP1B        | 12 | 1945052   | 1945052   | Missense    | SNP | T | C | BRC47 | NM_152640.3    | p.N152S  |
| FGF23        | 12 | 4350048   | 4350048   | Missense    | SNP | G | A | CSB9  | NM_020638.2    | p.R160W  |

|           |    |          |          |             |     |         |   |       |                 |                |          |
|-----------|----|----------|----------|-------------|-----|---------|---|-------|-----------------|----------------|----------|
| FGF6      | 12 | 4424816  | 4424816  | Missense    | SNP | G       | C | BRC7  | NM_020996.1     | p.S61C         |          |
| KCNA1     | 12 | 4891482  | 4891482  | Missense    | SNP | C       | T | CSB13 | NM_000217.2     | p.T226M        |          |
| NTF3      | 12 | 5474132  | 5474132  | Missense    | SNP | C       | T | BRC24 | NM_001102654.1  | p.S177L        |          |
| ANO2      | 12 | 5578918  | 5578918  | Missense    | SNP | C       | T | BRC51 | NM_020373.2     | p.M743I        |          |
| NCAPD2    | 12 | 6507214  | 6507214  | Missense    | SNP | C       | G | BRC39 | NM_014865.3     | p.S973C        |          |
| CHD4      | 12 | 6567358  | 6567358  | Missense    | SNP | G       | A | BRC32 | NM_001273.2     | p.R1162W       |          |
| CHD4      | 12 | 6567743  | 6567743  | Missense    | SNP | G       | T | CSB1  | NM_001273.2     | p.N1149K       |          |
| CD4       | 12 | 6795510  | 6795510  | Missense    | SNP | A       | G | CSB30 | NM_000616.3     | p.Y212C        |          |
| PHB2      | 12 | 6947853  | 6947853  | Silent      | SNP | C       | T | BRC39 | NM_007273.1     | p.L153         |          |
| CD163L1   | 12 | 7417227  | 7417227  | Missense    | SNP | C       | T | BRC52 | NM_174941.4     | p.R1229Q       |          |
| SLC2A14   | 12 | 7872580  | 7872580  | Missense    | SNP | C       | G | BRC50 | NM_153449.2     | p.E244D        |          |
| ZNF705A   | 12 | 8221060  | 8221060  | Missense    | SNP | C       | A | CSB1  | NM_001004328.2  | p.Q173K        |          |
| M6PR      | 12 | 8986307  | 8986307  | Missense    | SNP | A       | T | BRC24 | NM_002355.2     | p.F228Y        |          |
| C12orf33  | 12 | 9101523  | 9101523  | RNA         | SNP | C       | T | BRC7  | XR_041988.1     | NULL           |          |
| A2M       | 12 | 9116519  | 9116519  | Silent      | SNP | G       | C | CSB1  | NM_000014.4     | p.L1324        |          |
| CLEC7A    | 12 | 10173939 | 10173939 | Missense    | SNP | G       | A | BRC39 | NM_197947.4     | p.H4Y          |          |
| KLRC2     | 12 | 10479670 | 10479670 | Nonsense    | SNP | G       | T | BRC31 | NM_002260.3     | p.C61*         |          |
| CSDA      | 12 | 10753880 | 10753880 | Missense    | SNP | C       | A | CSB2  | NM_003651.1     | p.R225L        |          |
| TAS2R8    | 12 | 10849947 | 10849947 | Silent      | SNP | C       | T | BRC50 | NM_023918.1     | p.L300         |          |
| TAS2R14   | 12 | 10983040 | 10983040 | Missense    | SNP | C       | G | CSB16 | NM_023922.1     | p.V12L         |          |
| PRB1      | 12 | 11397916 | 11397916 | Nonsense    | SNP | G       | A | CSB7  | ENST00000381832 | p.Q253*        |          |
| DUSP16    | 12 | 12521828 | 12521828 | Missense    | SNP | G       | C | BRC44 | NM_030640.1     | p.L402V        |          |
| CDKN1B    | 12 | 12762252 | 12762252 | Ins         | INS |         | 0 | G     | BRC20           | NM_004064.3    | p.K73fs  |
| CDKN1B    | 12 | 12763037 | 12763037 | Nonsense    | SNP | C       | T | BRC18 | NM_004064.3     | p.Q163*        |          |
| DDX47     | 12 | 12865928 | 12865928 | Splice_Site | SNP | G       | A | CSB24 | NM_016355.3     | e4+1           |          |
| GPRC5A    | 12 | 12952642 | 12952642 | Missense    | SNP | G       | A | CSB15 | NM_003979.3     | p.M64I         |          |
| WBP11     | 12 | 14835428 | 14835428 | Missense    | SNP | C       | A | BRC31 | NM_016312.2     | p.K319N        |          |
|           |    |          |          |             |     | AGTTGCA |   |       |                 |                |          |
|           |    |          |          |             |     | T       |   |       |                 |                |          |
|           |    |          |          | Frame Shift |     | TTAGGTT |   |       |                 |                |          |
| LOC729025 | 12 | 16302041 | 16302056 | Del         | DEL |         |   | 0     | CSB25           | XM_001129090.1 | p.M200fs |
| PIK3C2G   | 12 | 18638746 | 18638746 | Missense    | SNP | G       | C | CSB1  | ENST00000266497 | p.E1314Q       |          |
| PLCZ1     | 12 | 18739278 | 18739278 | Missense    | SNP | C       | T | BRC16 | NM_033123.2     | p.A432T        |          |
| PDE3A     | 12 | 20691080 | 20691080 | Missense    | SNP | G       | T | CSB2  | NM_000921.3     | p.A832S        |          |
| GYS2      | 12 | 21602509 | 21602509 | Silent      | SNP | C       | T | BRC20 | NM_021957.3     | p.Q438         |          |

|                     |    |          |          |                         |     |    |   |         |                 |           |
|---------------------|----|----------|----------|-------------------------|-----|----|---|---------|-----------------|-----------|
| GYS2                | 12 | 21603857 | 21603857 | Missense                | SNP | T  | A | CSB16   | NM_021957.3     | p.L408F   |
| ABCC9               | 12 | 21908676 | 21908676 | Missense                | SNP | A  | G | CSB1    | NM_005691.2     | p.V734A   |
| ABCC9               | 12 | 21970173 | 21970173 | Missense                | SNP | C  | T | BRC47   | NM_005691.2     | p.E126K   |
| CASC1               | 12 | 25239236 | 25239236 | Missense                | SNP | T  | C | BRC15   | NM_001082972.1  | p.T10A    |
| KRAS                | 12 | 25289551 | 25289551 | Missense                | SNP | C  | T | CSB1    | NM_033360.3     | p.G12D    |
| SSPN                | 12 | 26274973 | 26274973 | Silent                  | SNP | C  | T | CSB2    | NM_005086.1     | p.A143    |
| TMTC1               | 12 | 29561698 | 29561698 | Missense                | SNP | C  | T | CSB1    | NM_175861.2     | p.E592K   |
| TMTC1               | 12 | 29580469 | 29580469 | Missense                | SNP | G  | C | BRC52   | NM_175861.2     | p.I467M   |
| TMTC1               | 12 | 29601123 | 29601123 | Missense                | SNP | T  | C | CSB28   | NM_175861.2     | p.Y429C   |
| C12orf35            | 12 | 32029657 | 32029657 | Missense                | SNP | G  | A | CSB9    | NM_018169.2     | p.G1501S  |
| DNM1L               | 12 | 32764902 | 32764902 | Missense                | SNP | G  | A | CSB1    | NM_012062.3     | p.D260N   |
| LRRK2               | 12 | 38973667 | 38973667 | Missense                | SNP | G  | A | CSB1    | NM_198578.3     | p.E915K   |
| LRRK2               | 12 | 38989280 | 38989280 | Missense                | SNP | A  | G | CSB19   | NM_198578.3     | p.K1432R  |
| PDZRN4              | 12 | 40252517 | 40252517 | Missense                | SNP | C  | T | BRC48   | NM_013377.3     | p.R299C   |
| ZCRB1               | 12 | 40993986 | 40993986 | Missense                | SNP | C  | G | CSB1    | NM_033114.3     | p.E135Q   |
| PRICKLE1            | 12 | 41144790 | 41144790 | Missense                | SNP | C  | T | CSB19   | NM_153026.1     | p.R438Q   |
| ADAMTS20            | 12 | 42119987 | 42119987 | Missense<br>Frame Shift | SNP | C  | T | BRC13   | NM_025003.3     | p.E815K   |
| ARID2               | 12 | 44530397 | 44530398 | Del                     | DEL | TC |   | 0 BRC15 | NM_152641.2     | p.S742fs  |
| AMIGO2              | 12 | 45758946 | 45758946 | Missense                | SNP | C  | T | CSB7    | NM_181847.1     | p.G36D    |
| COL2A1              | 12 | 46660629 | 46660629 | Missense                | SNP | C  | A | BRC38   | NM_001844.4     | p.G867V   |
| COL2A1              | 12 | 46661874 | 46661874 | Silent                  | SNP | C  | T | CSB1    | NM_001844.4     | p.L787    |
| PFKM                | 12 | 46825644 | 46825644 | Silent                  | SNP | G  | A | BRC40   | NM_000289.4     | p.L743    |
| H1FNT               | 12 | 47009605 | 47009605 | Silent                  | SNP | C  | T | CSB22   | NM_181788.1     | p.Y88     |
| C12orf54            | 12 | 47170884 | 47170884 | Missense<br>Frame Shift | SNP | G  | A | CSB1    | NM_152319.2     | p.R64Q    |
| MLL2                | 12 | 47711616 | 47711616 | Del                     | DEL | G  |   | 0 BRC32 | NM_003482.3     | p.P4380fs |
| MLL2                | 12 | 47713099 | 47713099 | Nonsense                | SNP | G  | A | CSB7    | NM_003482.3     | p.Q3886*  |
| MLL2                | 12 | 47733011 | 47733011 | Nonsense                | SNP | G  | A | BRC19   | NM_003482.3     | p.Q356*   |
| ENSG0000020258<br>2 | 12 | 48557808 | 48557808 | Missense                | SNP | G  | A | BRC4    | ENST00000365712 | p.H387Y   |
| LARP4               | 12 | 49110619 | 49110619 | Nonsense                | SNP | C  | T | BRC15   | NM_199188.3     | p.R139*   |
| DIP2B               | 12 | 49320891 | 49320891 | Missense                | SNP | G  | A | CSB29   | NM_173602.2     | p.R97Q    |
| DIP2B               | 12 | 49411439 | 49411439 | Missense                | SNP | C  | G | BRC40   | NM_173602.2     | p.S1221C  |
| LETMD1              | 12 | 49728417 | 49728417 | Missense                | SNP | C  | G | CSB1    | NM_015416.1     | p.S4C     |
| LETMD1              | 12 | 49732243 | 49732243 | Missense                | SNP | G  | A | CSB31   | NM_015416.1     | p.E126K   |

|           |    |          |          |                         |     |                |   |         |                 |           |
|-----------|----|----------|----------|-------------------------|-----|----------------|---|---------|-----------------|-----------|
| SLC4A8    | 12 | 50169989 | 50169989 | Missense                | SNP | C              | T | BRC44   | NM_001039960.1  | p.T896M   |
| C12orf44  | 12 | 50753789 | 50753789 | Silent                  | SNP | C              | T | CSB1    | NM_001098673.1  | p.L30     |
| KRT79     | 12 | 51514065 | 51514065 | Missense                | SNP | G              | A | CSB10   | NM_175834.2     | p.R83W    |
| TENC1     | 12 | 51740935 | 51740944 | Frame Shift<br>Del      | DEL | GGGGCC<br>ACTC |   | 0 CSB3  | NM_015319.2     | p.G1003fs |
| CSAD      | 12 | 51852437 | 51852437 | Missense                | SNP | G              | C | BRC39   | NM_015989.4     | p.L102V   |
| MFSD5     | 12 | 51933814 | 51933814 | Nonsense<br>Frame Shift | SNP | C              | T | BRC39   | NM_032889.3     | p.Q310*   |
| PCBP2     | 12 | 52148868 | 52148869 | Del<br>Frame Shift      | DEL | CA             |   | 0 BRC52 | NM_005016.2     | p.T294fs  |
| MAP3K12   | 12 | 52167053 | 52167054 | Del                     | DEL | AG             |   | 0 BRC38 | NM_006301.2     | p.P97fs   |
| HOXC10    | 12 | 52669329 | 52669329 | Missense                | SNP | T              | A | CSB1    | NM_017409.3     | p.F287L   |
| HOXC5     | 12 | 52697090 | 52697090 | RNA                     | SNP | G              | C | BRC41   | NR_003084.2     | NULL      |
| LOC644222 | 12 | 52843019 | 52843019 | Missense                | SNP | G              | C | BRC39   | XM_932052.1     | p.E5Q     |
| CBX5      | 12 | 52926248 | 52926248 | Missense                | SNP | G              | A | BRC31   | NM_012117.1     | p.R115W   |
| PDE1B     | 12 | 53255265 | 53255265 | Missense                | SNP | G              | C | CSB22   | NM_000924.2     | p.R394P   |
| KIAA0748  | 12 | 53642797 | 53642797 | Silent                  | SNP | C              | T | CSB10   | NM_001098815.1  | p.S384    |
| PHC1B     | 12 | 54094358 | 54094358 | Nonsense                | SNP | G              | A | CSB15   | ENST00000326184 | p.Q144*   |
| SLC39A5   | 12 | 54915617 | 54915617 | Missense                | SNP | G              | A | BRC50   | NM_173596.1     | p.E270K   |
| COQ10A    | 12 | 54949534 | 54949534 | Silent                  | SNP | C              | G | BRC41   | NM_144576.1     | p.L166    |
| STAT2     | 12 | 55036219 | 55036219 | Silent                  | SNP | C              | T | BRC50   | NM_005419.2     | p.L83     |
| LRP1      | 12 | 55856065 | 55856065 | Missense                | SNP | C              | G | BRC39   | NM_002332.2     | p.I1300M  |
| LRP1      | 12 | 55884741 | 55884741 | Silent                  | SNP | C              | T | BRC50   | NM_002332.2     | p.I3712   |
| R3HDM2    | 12 | 55963942 | 55963942 | Missense                | SNP | G              | C | CSB1    | NM_014925.3     | p.S15C    |
| R3HDM2    | 12 | 55978219 | 55978219 | Splice_Site             | SNP | C              | G | BRC18   | ENST00000403821 | e5-1      |
| INHBE     | 12 | 56135863 | 56135863 | Missense                | SNP | A              | T | BRC14   | NM_031479.3     | p.I93F    |
| ARHGAP9   | 12 | 56157634 | 56157634 | Missense                | SNP | G              | T | CSB22   | NM_032496.1     | p.P211T   |
| OS9       | 12 | 56400181 | 56400181 | Missense                | SNP | G              | A | BRC51   | NM_006812.1     | p.V545I   |
| MON2      | 12 | 61181707 | 61181707 | Missense                | SNP | G              | C | BRC50   | NM_015026.2     | p.E251Q   |
| MON2      | 12 | 61240912 | 61240912 | Missense                | SNP | G              | C | BRC39   | NM_015026.2     | p.D1262H  |
| DPY19L2   | 12 | 62240636 | 62240636 | Missense                | SNP | C              | T | CSB33   | NM_173812.4     | p.V734I   |
| TBK1      | 12 | 63146963 | 63146963 | Missense                | SNP | A              | G | CSB23   | NM_013254.2     | p.H125R   |
| TBK1      | 12 | 63181396 | 63181396 | Missense                | SNP | G              | T | CSB15   | NM_013254.2     | p.D720Y   |
| KIAA0984  | 12 | 63516598 | 63516598 | Missense                | SNP | C              | T | BRC40   | XM_037557.1     | p.A382V   |
| WIF1      | 12 | 63748879 | 63748879 | Missense                | SNP | A              | G | BRC8    | NM_007191.3     | p.M157T   |
| MSRB3     | 12 | 64049047 | 64049047 | Missense                | SNP | C              | T | BRC39   | NM_198080.1     | p.S96L    |

|                 |    |           |           |                         |     |   |   |       |                 |          |
|-----------------|----|-----------|-----------|-------------------------|-----|---|---|-------|-----------------|----------|
| HMGA2           | 12 | 64595174  | 64595174  | Silent                  | SNP | C | T | CSB1  | NM_003484.4     | p.H106   |
| IRAK3           | 12 | 64925266  | 64925266  | Missense                | SNP | G | A | BRC31 | NM_007199.1     | p.R424Q  |
| DYRK2           | 12 | 66337629  | 66337629  | Silent                  | SNP | C | G | BRC39 | NM_006482.3     | p.L225   |
| ENSG00000206650 | 12 | 67307332  | 67307332  | RNA                     | SNP | G | A | BRC39 | ENST00000383923 | NULL     |
| NAV3            | 12 | 76884180  | 76884180  | Missense                | SNP | G | C | CSB1  | NM_014903.4     | p.R152T  |
| PPP1R12A        | 12 | 78723581  | 78723581  | Missense                | SNP | G | C | BRC32 | NM_002480.1     | p.A641G  |
| PPP1R12A        | 12 | 78726489  | 78726489  | Splice_Site             | INS |   | T | CSB22 | NM_002480.1     | e11-1    |
| PPP1R12A        | 12 | 78750381  | 78750381  | Missense                | SNP | C | T | BRC13 | NM_002480.1     | p.R170Q  |
| ACSS3           | 12 | 80061105  | 80061105  | Nonsense                | SNP | C | G | CSB1  | NM_024560.2     | p.S290*  |
| SLC6A15         | 12 | 83791129  | 83791129  | Missense                | SNP | C | G | BRC41 | NM_182767.5     | p.R326T  |
| LRRIQ1          | 12 | 83973765  | 83973765  | Nonsense<br>Frame Shift | SNP | G | T | CSB2  | NM_001079910.1  | p.E355*  |
| GALNT4          | 12 | 88442277  | 88442277  | Del                     | DEL | G |   | CSB33 | NM_003774.3     | p.R61fs  |
| ATP2B1          | 12 | 88542195  | 88542195  | Nonsense                | SNP | G | A | BRC38 | NM_001682.1     | p.Q414*  |
| LOC643153       | 12 | 88628064  | 88628064  | Silent                  | SNP | C | T | BRC50 | XM_931367.1     | p.A5     |
| C12orf63        | 12 | 95609088  | 95609088  | Missense                | SNP | C | A | CSB1  | NM_198520.2     | p.Q470K  |
| LOC121456       | 12 | 97373685  | 97373685  | RNA                     | SNP | C | T | BRC7  | XR_016411.1     | NULL     |
| APAF1           | 12 | 97566680  | 97566680  | Missense                | SNP | C | G | BRC39 | NM_181861.2     | p.S95C   |
| ANKS1B          | 12 | 98724371  | 98724371  | Missense                | SNP | T | C | BRC3  | NM_152788.2     | p.N204S  |
| UHRF1BP1L       | 12 | 98976764  | 98976764  | Missense                | SNP | G | C | CSB7  | NM_015054.1     | p.L808V  |
| GAS2L3          | 12 | 99541525  | 99541525  | Missense                | SNP | C | A | BRC39 | NM_174942.1     | p.Q271K  |
| UTP20           | 12 | 100208661 | 100208661 | Missense                | SNP | G | A | BRC13 | NM_014503.2     | p.R252Q  |
| UTP20           | 12 | 100274943 | 100274943 | Silent                  | SNP | C | G | BRC39 | NM_014503.2     | p.L1881  |
| GNPTAB          | 12 | 100679106 | 100679106 | Missense                | SNP | G | T | BRC28 | NM_024312.3     | p.S1022Y |
| IGF1            | 12 | 101337437 | 101337437 | Missense                | SNP | C | T | CSB16 | NM_000618.3     | p.D128N  |
| STAB2           | 12 | 102655583 | 102655583 | Silent                  | SNP | G | A | BRC51 | NM_017564.9     | p.Q1864  |
| NT5DC3          | 12 | 102732916 | 102732916 | Missense                | SNP | C | T | BRC29 | NM_001031701.2  | p.V108M  |
| ENSG00000214198 | 12 | 102833546 | 102833546 | Missense                | SNP | G | C | BRC41 | ENST00000388789 | p.P77R   |
| TXNRD1          | 12 | 103229281 | 103229281 | Silent                  | SNP | C | T | BRC41 | ENST00000354940 | p.I16    |
| TXNRD1          | 12 | 103236856 | 103236856 | Nonsense                | SNP | C | T | CSB24 | ENST00000354940 | p.Q106*  |
| SLC41A2         | 12 | 103827630 | 103827630 | Nonsense                | SNP | A | C | BRC16 | NM_032148.3     | p.L116*  |
| NUAK1           | 12 | 105004681 | 105004681 | Silent                  | SNP | G | A | BRC39 | NM_014840.2     | p.F158   |
| LOC341378       | 12 | 105090077 | 105090077 | Nonsense                | SNP | C | A | BRC33 | XM_001715424.1  | p.S264*  |
| RFX4            | 12 | 105633435 | 105633435 | Missense                | SNP | G | T | BRC41 | NM_213594.3     | p.R374L  |

|              |    |           |           |                             |     |     |     |         |                 |                    |
|--------------|----|-----------|-----------|-----------------------------|-----|-----|-----|---------|-----------------|--------------------|
| CRY1         | 12 | 105917540 | 105917540 | Nonsense                    | SNP | C   | T   | CSB22   | NM_004075.3     | p.W352*            |
| CORO1C       | 12 | 107619135 | 107619135 | Missense                    | SNP | G   | C   | BRC7    | NM_014325.2     | p.S30C             |
| DAO          | 12 | 107817315 | 107817315 | Missense                    | SNP | C   | T   | BRC31   | NM_001917.4     | p.R283W            |
| ACACB        | 12 | 108128972 | 108128972 | Silent                      | SNP | C   | T   | BRC13   | NM_001093.3     | p.F996             |
| ACACB        | 12 | 108182762 | 108182762 | Silent                      | SNP | G   | A   | CSB1    | NM_001093.3     | p.A2197            |
| GIT2         | 12 | 108883513 | 108883513 | Missense                    | SNP | C   | T   | BRC30   | NM_057169.1     | p.V314I            |
| ANKRD13A     | 12 | 108959592 | 108959592 | Silent                      | SNP | C   | T   | CSB15   | NM_033121.1     | p.P541             |
| ANAPC7       | 12 | 109305095 | 109305095 | Missense                    | SNP | C   | T   | CSB1    | NM_016238.1     | p.E291K            |
| MYL2         | 12 | 109835500 | 109835500 | Missense                    | SNP | C   | T   | CSB1    | NM_000432.3     | p.E96K             |
| PTPN11       | 12 | 111372593 | 111372593 | Missense                    | SNP | G   | A   | BRC50   | NM_002834.3     | p.E76K             |
| TBX3         | 12 | 113596584 | 113596584 | Silent                      | SNP | G   | A   | BRC7    | NM_016569.3     | p.F513<br>p.N212in |
| TBX3         | 12 | 113603087 | 113603089 | In Frame Del<br>Frame Shift | DEL | TGT |     | 0 BRC24 | NM_016569.3     | Frame del          |
| TBX3         | 12 | 113603113 | 113603113 | Del<br>Frame Shift          | DEL | A   |     | 0 CSB30 | NM_016569.3     | p.F204fs           |
| TBX3         | 12 | 113605185 | 113605185 | Ins                         | INS |     | 0 A | CSB34   | NM_016569.3     | p.V68fs            |
| MED13L       | 12 | 114928073 | 114928073 | Missense                    | SNP | T   | A   | CSB19   | NM_015335.3     | p.D818V            |
| MED13L       | 12 | 114931040 | 114931040 | Missense                    | SNP | T   | A   | BRC44   | NM_015335.3     | p.S521C            |
| RFC5         | 12 | 116947079 | 116947079 | Missense                    | SNP | C   | G   | BRC11   | NM_007370.1     | p.I154M            |
| LOC100128895 | 12 | 116962573 | 116962573 | Nonsense                    | SNP | C   | T   | BRC44   | XM_001723671.1  | p.Q47*             |
| TAOK3        | 12 | 117094815 | 117094815 | Missense<br>Nonstop         | SNP | C   | T   | CSB1    | NM_016281.3     | p.E577K            |
| HSPB8        | 12 | 118116045 | 118116045 | Mutation                    | SNP | G   | C   | CSB1    | NM_014365.2     | p.*197S            |
| CCDC60       | 12 | 118427440 | 118427440 | Missense                    | SNP | G   | A   | BRC31   | NM_178499.3     | p.E278K            |
| GATC         | 12 | 119379319 | 119379319 | Silent                      | SNP | A   | G   | BRC16   | NM_176818.1     | p.L104             |
| HPD          | 12 | 120778895 | 120778895 | Missense                    | SNP | G   | A   | BRC13   | NM_002150.2     | p.S73L             |
| LRRC43       | 12 | 121253933 | 121253933 | Missense                    | SNP | C   | A   | CSB14   | NM_001098519.1  | p.F654L            |
| KNTC1        | 12 | 121638247 | 121638247 | Missense                    | SNP | C   | T   | CSB1    | NM_014708.4     | p.S1256F           |
| KNTC1        | 12 | 121664200 | 121664200 | Missense                    | SNP | G   | T   | CSB2    | NM_014708.4     | p.C1939F           |
| GPR81        | 12 | 121780333 | 121780333 | Silent                      | SNP | G   | A   | BRC11   | NM_032554.3     | p.I169             |
| DNAH10       | 12 | 122916539 | 122916539 | Missense                    | SNP | A   | G   | CSB19   | ENST00000409039 | p.Y2260C           |
| TMEM132B     | 12 | 124400421 | 124400421 | Missense                    | SNP | C   | T   | BRC36   | NM_052907.2     | p.R175W            |
| TMEM132D     | 12 | 128125372 | 128125372 | Silent                      | SNP | G   | A   | BRC39   | NM_133448.2     | p.V767             |
| PIWIL1       | 12 | 129406054 | 129406054 | Silent                      | SNP | C   | T   | BRC10   | NM_004764.3     | p.N431             |
| PIWIL1       | 12 | 129413557 | 129413557 | Missense                    | SNP | G   | T   | BRC16   | NM_004764.3     | p.V704L            |
| RIMBP2       | 12 | 129487351 | 129487351 | Missense                    | SNP | C   | T   | BRC39   | NM_015347.4     | p.E682K            |

|          |    |           |           |                    |     |   |        |         |                |           |
|----------|----|-----------|-----------|--------------------|-----|---|--------|---------|----------------|-----------|
| GPR133   | 12 | 130064736 | 130064736 | Silent             | SNP | C | T      | BRC22   | NM_198827.3    | p.F457    |
| GPR133   | 12 | 130156313 | 130156313 | Missense           | SNP | C | A      | BRC5    | NM_198827.3    | p.L613M   |
| PUS1     | 12 | 130992448 | 130992448 | Silent             | SNP | C | T      | BRC31   | NM_025215.1    | p.A401    |
| NOC4L    | 12 | 131199392 | 131199392 | Silent             | SNP | C | T      | CSB1    | NM_024078.1    | p.L300    |
| POLE     | 12 | 131719371 | 131719371 | Frame Shift<br>Del | DEL | C |        | 0 BRC17 | NM_006231.2    | p.A2030fs |
| POLE     | 12 | 131724707 | 131724707 | Missense           | SNP | C | G      | CSB1    | NM_006231.2    | p.D1882H  |
| GOLGA3   | 12 | 131882652 | 131882652 | Silent             | SNP | G | A      | CSB27   | NM_005895.3    | p.I776    |
| GOLGA3   | 12 | 131888527 | 131888527 | Nonsense           | SNP | C | A      | CSB10   | NM_005895.3    | p.E567*   |
| ZNF140   | 12 | 132192590 | 132192590 | Missense           | SNP | G | C      | BRC42   | NM_003440.2    | p.E218D   |
| MPHOSPH8 | 13 | 19138645  | 19138645  | Missense           | SNP | G | C      | BRC39   | NM_017520.2    | p.Q700H   |
| C13orf3  | 13 | 20640454  | 20640454  | Missense           | SNP | G | C      | CSB5    | NM_145061.4    | p.S139C   |
| SGCG     | 13 | 22792834  | 22792834  | Missense           | SNP | G | A      | BRC9    | NM_000231.2    | p.A213T   |
| PCOTH    | 13 | 23364043  | 23364043  | Silent             | SNP | G | A      | CSB8    | NM_001014442.2 | p.T99     |
| SPATA13  | 13 | 23766929  | 23766929  | Missense           | SNP | C | G      | BRC18   | NM_153023.1    | p.L420V   |
| ATP12A   | 13 | 24161466  | 24161466  | Missense           | SNP | G | C      | CSB28   | NM_001676.4    | p.A167P   |
| CENPJ    | 13 | 24378378  | 24378378  | Missense           | SNP | T | A      | CSB25   | NM_018451.3    | p.I600F   |
| CENPJ    | 13 | 24385012  | 24385012  | Missense           | SNP | G | C      | CSB1    | NM_018451.3    | p.S51C    |
| MTMR6    | 13 | 24725956  | 24725956  | Missense           | SNP | G | A      | CSB1    | NM_004685.3    | p.S431L   |
| ATP8A2   | 13 | 25015503  | 25015503  | Missense           | SNP | T | C      | BRC20   | NM_016529.4    | p.I285T   |
| RNF6     | 13 | 25691769  | 25691769  | Silent             | SNP | C | A      | BRC18   | NM_005977.3    | p.S6      |
| PAN3     | 13 | 27738983  | 27738983  | Missense           | SNP | G | A      | BRC18   | NM_175854.5    | p.D315N   |
| FRY      | 13 | 31619488  | 31619488  | Nonsense           | SNP | C | T      | CSB1    | NM_023037.2    | p.R417*   |
| FRY      | 13 | 31716220  | 31716220  | Silent             | SNP | C | G      | BRC39   | NM_023037.2    | p.L2243   |
| FRY      | 13 | 31739473  | 31739473  | Missense           | SNP | C | T      | BRC13   | NM_023037.2    | p.H2705Y  |
| FRY      | 13 | 31761860  | 31761860  | Missense           | SNP | G | A      | BRC39   | NM_023037.2    | p.E2854K  |
| BRCA2    | 13 | 31791245  | 31791245  | Silent             | SNP | A | G      | BRC39   | NM_000059.3    | p.E33     |
| BRCA2    | 13 | 31809274  | 31809275  | Frame Shift<br>Ins | INS |   | 0 TTTT | CSB2    | NM_000059.3    | p.L929fs  |
| KL       | 13 | 32532897  | 32532897  | Missense           | SNP | G | A      | BRC39   | NM_004795.3    | p.D561N   |
| SPG20    | 13 | 35807391  | 35807391  | Missense           | SNP | C | T      | BRC38   | NM_015087.1    | p.E193K   |
| TRPC4    | 13 | 37146390  | 37146390  | Missense           | SNP | G | A      | BRC21   | NM_016179.1    | p.S450F   |
| TRPC4    | 13 | 37164459  | 37164459  | Missense           | SNP | G | C      | BRC30   | NM_016179.1    | p.P304R   |
| FREM2    | 13 | 38159912  | 38159912  | Missense           | SNP | G | T      | BRC39   | NM_207361.4    | p.R144L   |
| FREM2    | 13 | 38161045  | 38161045  | Missense           | SNP | G | A      | CSB1    | NM_207361.4    | p.D522N   |
| AKAP11   | 13 | 41771561  | 41771561  | Missense           | SNP | C | G      | BRC16   | NM_016248.2    | p.H227D   |



|                     |    |           |           |             |     |   |   |       |                 |          |
|---------------------|----|-----------|-----------|-------------|-----|---|---|-------|-----------------|----------|
| TSC22D1             | 13 | 43908640  | 43908640  | Missense    | SNP | C | T | BRC31 | NM_006022.2     | p.S42N   |
| SLC25A30            | 13 | 44876501  | 44876501  | Silent      | SNP | G | A | CSB24 | NM_001010875.2  | p.V118   |
| LCP1                | 13 | 45614517  | 45614517  | Silent      | SNP | C | T | CSB1  | NM_002298.4     | p.A471   |
| ITM2B               | 13 | 47728346  | 47728346  | Nonsense    | SNP | C | A | BRC49 | NM_021999.4     | p.Y93*   |
| RB1                 | 13 | 47814760  | 47814760  | Nonsense    | SNP | G | T | BRC41 | NM_000321.2     | p.E97*   |
| RB1                 | 13 | 47853581  | 47853581  | Splice_Site | SNP | G | C | BRC20 | NM_000321.2     | e17+1    |
| RB1                 | 13 | 47931858  | 47931858  | Missense    | SNP | T | G | BRC47 | NM_000321.2     | p.L665R  |
| RB1                 | 13 | 47931965  | 47931965  | Missense    | SNP | G | A | BRC51 | NM_000321.2     | p.D701N  |
| SETDB2              | 13 | 48955642  | 48955642  | Missense    | SNP | C | T | BRC39 | NM_031915.1     | p.S487L  |
| TRIM13              | 13 | 49485223  | 49485223  | Missense    | SNP | C | G | BRC47 | NM_001007278.1  | p.F385L  |
| WDFY2               | 13 | 51199900  | 51199900  | Silent      | SNP | C | T | BRC11 | NM_052950.3     | p.L191   |
| NEK3                | 13 | 51605836  | 51605836  | Missense    | SNP | C | T | BRC47 | ENST00000258597 | p.E477K  |
| VPS36               | 13 | 51887991  | 51887991  | Missense    | SNP | G | C | CSB30 | NM_016075.2     | p.P379R  |
| PCDH17              | 13 | 57106729  | 57106729  | Missense    | SNP | C | T | CSB2  | NM_001040429.2  | p.S683L  |
| DIAPH3              | 13 | 59311559  | 59311559  | Missense    | SNP | T | A | BRC21 | NM_001042517.1  | p.N9211  |
| KLHL1               | 13 | 69173840  | 69173840  | Missense    | SNP | G | A | BRC47 | NM_020866.2     | p.P748S  |
| COMMD6              | 13 | 75009920  | 75009920  | Missense    | SNP | G | A | CSB8  | NM_203497.2     | p.P8L    |
| MYCBP2              | 13 | 76549332  | 76549332  | Silent      | SNP | C | T | BRC39 | NM_015057.3     | p.R3854  |
| MYCBP2              | 13 | 76613014  | 76613014  | Missense    | SNP | C | T | BRC8  | NM_015057.3     | p.V2419I |
| MYCBP2              | 13 | 76733476  | 76733476  | Missense    | SNP | G | C | CSB1  | NM_015057.3     | p.I523M  |
| EDNRB               | 13 | 77390669  | 77390669  | Missense    | SNP | G | A | BRC37 | NM_000115.2     | p.A14V   |
| SLITRK1             | 13 | 83352847  | 83352847  | Missense    | SNP | C | T | CSB2  | NM_052910.1     | p.R266Q  |
| MBNL2               | 13 | 96784568  | 96784568  | Missense    | SNP | C | A | CSB2  | NM_144778.2     | p.P71H   |
| SLC15A1             | 13 | 98156450  | 98156450  | Missense    | SNP | C | A | CSB1  | NM_005073.3     | p.G403V  |
| ENSG0000020179<br>3 | 13 | 98656140  | 98656140  | RNA         | SNP | C | G | BRC18 | ENST00000364923 | NULL     |
| PHGDHL1             | 13 | 98694791  | 98694791  | Missense    | SNP | G | C | BRC8  | ENST00000403766 | p.V101L  |
| FGF14               | 13 | 101851922 | 101851922 | Silent      | SNP | C | A | BRC44 | NM_175929.3     | p.S36    |
| KDELC1              | 13 | 102241696 | 102241696 | Missense    | SNP | A | T | BRC30 | NM_024089.2     | p.I253N  |
| ERCC5               | 13 | 102302591 | 102302591 | Missense    | SNP | C | A | BRC32 | NM_000123.2     | p.R71S   |
| ERCC5               | 13 | 102325815 | 102325815 | Missense    | SNP | T | C | CSB6  | NM_000123.2     | p.M1041T |
| LIG4                | 13 | 107660261 | 107660261 | Missense    | SNP | C | G | CSB27 | NM_001098268.1  | p.E453Q  |
| COL4A2              | 13 | 109875101 | 109875101 | Missense    | SNP | G | A | BRC3  | NM_001846.2     | p.G67D   |
| COL4A2              | 13 | 109936036 | 109936036 | Nonsense    | SNP | C | G | BRC7  | NM_001846.2     | p.S1020* |
| TUBGCP3             | 13 | 112250010 | 112250010 | Missense    | SNP | G | A | BRC50 | NM_006322.4     | p.R365W  |



|              |    |           |           |                    |     |         |        |         |                 |          |
|--------------|----|-----------|-----------|--------------------|-----|---------|--------|---------|-----------------|----------|
| MCF2L        | 13 | 112779373 | 112779373 | Missense           | SNP | G       | A      | BRC9    | NM_024979.1     | p.V501M  |
| PROZ         | 13 | 112860990 | 112860990 | Silent             | SNP | C       | T      | CSB1    | NM_003891.1     | p.V5     |
| CUL4A        | 13 | 112957089 | 112957089 | Missense           | SNP | G       | A      | BRC16   | NM_001008895.1  | p.E612K  |
| ATP4B        | 13 | 113355734 | 113355734 | Silent             | SNP | C       | T      | BRC5    | NM_000705.2     | p.P86    |
| FLJ39632     | 14 | 18960115  | 18960115  | RNA                | INS |         | 0 GCGG | BRC32   | XR_015133.1     | NULL     |
| uc001vwc.2   | 14 | 19072291  | 19072291  | Silent             | SNP | T       | C      | CSB22   | ENST00000356930 | p.Q377   |
| OR4M1        | 14 | 19319250  | 19319250  | Missense           | SNP | G       | A      | BRC39   | NM_001005500.1  | p.C310Y  |
| OR4N2        | 14 | 19365723  | 19365723  | Silent             | SNP | C       | A      | CSB21   | NM_001004723.1  | p.I92    |
| OR4K17       | 14 | 19655948  | 19655948  | Silent             | SNP | C       | A      | CSB23   | NM_001004715.1  | p.L181   |
| OR4K17       | 14 | 19656106  | 19656106  | Missense           | SNP | G       | T      | CSB29   | NM_001004715.1  | p.S234I  |
| KLHL33       | 14 | 19967960  | 19967960  | Missense           | SNP | G       | A      | CSB14   | XM_001716896.1  | p.R525C  |
| OR5AU1       | 14 | 20693500  | 20693500  | Silent             | SNP | G       | A      | CSB9    | NM_001004731.1  | p.A175   |
| SUPT16H      | 14 | 20910016  | 20910017  | Frame Shift<br>Del | DEL | CA      |        | 0 BRC42 | NM_007192.3     | p.D63fs  |
| TOX4         | 14 | 21026668  | 21026668  | Missense           | SNP | C       | G      | BRC47   | NM_014828.2     | p.S133C  |
| MYH7         | 14 | 22968302  | 22968302  | Silent             | SNP | G       | A      | BRC18   | NM_000257.2     | p.V411   |
| CPNE6        | 14 | 23614323  | 23614323  | Missense           | SNP | G       | C      | CSB1    | NM_006032.2     | p.E259Q  |
| NRL          | 14 | 23620599  | 23620599  | Missense           | SNP | C       | T      | BRC39   | NM_006177.3     | p.D134N  |
| RNF31        | 14 | 23694268  | 23694268  | Silent             | SNP | C       | T      | BRC51   | NM_017999.4     | p.T731   |
| TM9SF1       | 14 | 23731819  | 23731819  | Missense           | SNP | T       | C      | BRC10   | NM_006405.1     | p.D281G  |
| CIDEB        | 14 | 23845096  | 23845096  | Missense           | SNP | T       | C      | BRC33   | NM_014430.2     | p.N142D  |
| KIAA1305     | 14 | 23948443  | 23948443  | Missense           | SNP | C       | T      | BRC17   | NM_025081.2     | p.P535S  |
| LOC100129469 | 14 | 23957384  | 23957384  | Missense           | SNP | G       | A      | BRC36   | XM_001720680.1  | p.R66Q   |
| GZMH         | 14 | 24146302  | 24146302  | Missense           | SNP | G       | T      | CSB12   | NM_033423.3     | p.L164M  |
| GZMB         | 14 | 24173212  | 24173212  | Missense           | SNP | C       | G      | CSB1    | ENST00000382542 | p.E33Q   |
| NOVA1        | 14 | 26011390  | 26011390  | Silent             | SNP | G       | A      | BRC44   | NM_002515.2     | p.P165   |
| NOVA1        | 14 | 26134557  | 26134557  | Frame Shift<br>Ins | INS |         | 0 T    | CSB31   | NM_002515.2     | p.A61fs  |
| PRKD1        | 14 | 29116350  | 29116350  | Missense           | SNP | G       | A      | BRC49   | NM_002742.2     | p.H862Y  |
| SCFD1        | 14 | 30239207  | 30239207  | Missense           | SNP | C       | A      | BRC38   | NM_016106.2     | p.P468T  |
| ARHGAP5      | 14 | 31630585  | 31630585  | Missense           | SNP | C       | T      | BRC39   | NM_001030055.1  | p.S320L  |
| ARHGAP5      | 14 | 31630809  | 31630815  | Frame Shift<br>Del | DEL | ATTAATG |        | 0 CSB19 | NM_001030055.1  | p.N396fs |
| ARHGAP5      | 14 | 31632225  | 31632225  | Nonsense           | SNP | C       | T      | CSB7    | NM_001030055.1  | p.R867*  |
| NPAS3        | 14 | 32594951  | 32594951  | Missense           | SNP | A       | G      | CSB6    | ENST00000356141 | p.N47S   |
| PSMA6        | 14 | 34847912  | 34847912  | Missense           | SNP | G       | C      | BRC31   | NM_002791.1     | p.K71N   |

|              |    |          |          |                    |     |       |   |       |                |                |           |
|--------------|----|----------|----------|--------------------|-----|-------|---|-------|----------------|----------------|-----------|
| MBIP         | 14 | 35853793 | 35853793 | Missense           | SNP | C     | T | BRC39 | NM_016586.1    | p.G110E        |           |
| FOXA1        | 14 | 37131440 | 37131440 | Silent             | SNP | G     | A | BRC39 | NM_004496.2    | p.G100         |           |
| MIA2         | 14 | 38786791 | 38786791 | Missense           | SNP | C     | A | BRC41 | NM_054024.3    | p.P421H        |           |
| LRFN5        | 14 | 41425896 | 41425896 | Silent             | SNP | G     | A | BRC39 | NM_152447.3    | p.L106         |           |
| FSCB         | 14 | 44043674 | 44043674 | Missense           | SNP | A     | T | CSB28 | NM_032135.3    | p.V756E        |           |
| FANCM        | 14 | 44715350 | 44715350 | Nonsense           | SNP | A     | T | CSB22 | NM_020937.2    | p.K1215*       |           |
| L2HGDH       | 14 | 49805644 | 49805644 | Missense           | SNP | C     | T | BRC50 | NM_024884.2    | p.G298E        |           |
| ATP5S        | 14 | 49849496 | 49849496 | Missense           | SNP | G     | C | BRC40 | NM_001003803.1 | p.C3S          |           |
| NIN          | 14 | 50293477 | 50293477 | Nonsense           | SNP | G     | A | BRC44 | NM_020921.3    | p.Q1341*       |           |
| PYGL         | 14 | 50457045 | 50457045 | Silent             | SNP | G     | A | CSB31 | NM_002863.3    | p.A273         |           |
| DDHD1        | 14 | 52599544 | 52599544 | Missense           | SNP | C     | T | CSB8  | NM_030637.1    | p.D545N        |           |
| C14orf101    | 14 | 56158061 | 56158061 | Missense           | SNP | C     | G | BRC41 | NM_017799.3    | p.S429C        |           |
| C14orf37     | 14 | 57675163 | 57675163 | Missense           | SNP | C     | T | CSB1  | NM_001001872.2 | p.E223K        |           |
| ARID4A       | 14 | 57864716 | 57864716 | Silent             | SNP | T     | G | BRC28 | NM_002892.3    | p.S197         |           |
| KIAA0586     | 14 | 58076572 | 58076572 | Missense           | SNP | T     | C | CSB23 | NM_014749.3    | p.I1411T       |           |
| C14orf135    | 14 | 59654803 | 59654803 | Missense           | SNP | G     | A | BRC41 | NM_022495.5    | p.G294S        |           |
| SLC38A6      | 14 | 60579642 | 60579642 | Missense           | SNP | C     | G | CSB3  | NM_153811.1    | p.P217A        |           |
| HIF1A        | 14 | 61277454 | 61277454 | Missense           | SNP | G     | C | CSB1  | NM_001530.3    | p.D630H        |           |
| SYT16        | 14 | 61532692 | 61532692 | Missense           | SNP | G     | A | BRC11 | NM_031914.2    | p.E68K         |           |
| LOC100130953 | 14 | 61614111 | 61614111 | Missense           | SNP | A     | T | BRC4  | XM_001718078.1 | p.L117Q        |           |
| SYNE2        | 14 | 63561694 | 63561694 | Missense           | SNP | G     | C | BRC18 | NM_182914.4    | p.L2018F       |           |
| MTHFD1       | 14 | 63937303 | 63937303 | Silent             | SNP | G     | A | CSB1  | NM_005956.3    | p.L27          |           |
| SPTB         | 14 | 64285804 | 64285808 | Frame Shift<br>Del | DEL | TCTCT |   | 0     | CSB2           | NM_001024858.4 | p.K2319fs |
| SPTB         | 14 | 64329798 | 64329798 | Missense           | SNP | C     | T | CSB28 | NM_001024858.4 | p.R779Q        |           |
| SMOC1        | 14 | 69489919 | 69489919 | Missense           | SNP | C     | T | CSB20 | NM_001034852.1 | p.R99W         |           |
| ADAM21       | 14 | 69994792 | 69994792 | Missense           | SNP | G     | T | BRC6  | NM_003813.2    | p.V275F        |           |
| PCNX         | 14 | 70514203 | 70514203 | Missense           | SNP | G     | A | BRC13 | NM_014982.2    | p.E466K        |           |
| WDR21A       | 14 | 72492943 | 72492943 | Missense           | SNP | G     | A | BRC50 | NM_015604.2    | p.E426K        |           |
| PAPLN        | 14 | 72797186 | 72797186 | Missense           | SNP | G     | T | BRC40 | NM_173462.3    | p.D641Y        |           |
| COQ6         | 14 | 73494639 | 73494639 | Missense           | SNP | G     | A | BRC47 | NM_182476.1    | p.R173H        |           |
| TMEM90A      | 14 | 73946120 | 73946120 | Silent             | SNP | C     | T | BRC21 | NM_001105579.1 | p.E27          |           |
| FCF1         | 14 | 74251380 | 74251380 | Missense           | SNP | G     | A | CSB7  | NM_015962.4    | p.A42T         |           |
| MLH3         | 14 | 74568533 | 74568533 | Missense           | SNP | C     | G | BRC50 | NM_001040108.1 | p.R1273T       |           |
| NEK9         | 14 | 74653696 | 74653696 | Silent             | SNP | G     | A | CSB33 | NM_033116.4    | p.C239         |           |

|             |    |           |           |                    |     |    |      |         |                 |           |
|-------------|----|-----------|-----------|--------------------|-----|----|------|---------|-----------------|-----------|
| TLL5        | 14 | 75281599  | 75281599  | Missense           | SNP | G  | A    | BRC38   | NM_015072.3     | p.R470Q   |
| TLL5        | 14 | 75418806  | 75418806  | Missense           | SNP | C  | G    | BRC9    | NM_015072.3     | p.P1183R  |
| ANGEL1      | 14 | 76342649  | 76342649  | Missense           | SNP | C  | G    | BRC47   | NM_015305.3     | p.D415H   |
| TMEM63C     | 14 | 76785394  | 76785394  | Silent             | SNP | C  | A    | BRC51   | NM_020431.2     | p.L626    |
| ISM2        | 14 | 77020550  | 77020550  | Missense           | SNP | C  | T    | BRC13   | NM_199296.3     | p.E166K   |
| ADCK1       | 14 | 77469367  | 77469367  | Silent             | SNP | C  | T    | CSB2    | NM_020421.1     | p.F484    |
| EML5        | 14 | 88276526  | 88276526  | Missense           | SNP | C  | G    | CSB1    | NM_183387.1     | p.W223C   |
| TRIP11      | 14 | 91547873  | 91547873  | Missense           | SNP | C  | T    | BRC18   | NM_004239.2     | p.M402I   |
| CPSF2       | 14 | 91679217  | 91679217  | Silent             | SNP | C  | T    | CSB1    | NM_017437.1     | p.S322    |
| SLC24A4     | 14 | 91985213  | 91985213  | Missense           | SNP | G  | C    | CSB1    | NM_153646.2     | p.K243N   |
| CHGA        | 14 | 92467727  | 92467727  | Silent             | SNP | C  | G    | BRC11   | NM_001275.3     | p.P245    |
| PRIMA1      | 14 | 93273363  | 93273363  | Silent             | SNP | G  | A    | CSB1    | NM_178013.3     | p.I112    |
| SERPINA5    | 14 | 94126375  | 94126375  | Silent             | SNP | G  | A    | BRC17   | NM_000624.4     | p.R288    |
| DICER1      | 14 | 94632740  | 94632740  | Missense           | SNP | C  | G    | CSB1    | NM_030621.3     | p.E1424Q  |
| DICER1      | 14 | 94644495  | 94644495  | Silent             | SNP | G  | C    | CSB1    | NM_030621.3     | p.L785    |
| EVL         | 14 | 99673671  | 99673671  | Missense           | SNP | C  | G    | BRC36   | NM_016337.2     | p.A323G   |
| MIRN136     | 14 | 100420863 | 100420863 | RNA                | SNP | C  | G    | BRC28   | ENST00000385207 | NULL      |
| MIRN329-2   | 14 | 100563226 | 100563226 | RNA                | SNP | C  | T    | BRC31   | ENST00000385029 | NULL      |
| DYNC1H1     | 14 | 101522296 | 101522296 | Frame Shift<br>Ins | INS |    | 0 AC | CSB15   | NM_001376.4     | p.M662fs  |
| DYNC1H1     | 14 | 101551314 | 101551314 | Frame Shift<br>Del | DEL | C  |      | 0 BRC30 | NM_001376.4     | p.L2379fs |
| TECPR2      | 14 | 101912826 | 101912827 | Frame Shift<br>Del | DEL | AG |      | 0 BRC26 | NM_014844.2     | p.E6fs    |
| AKT1        | 14 | 104314098 | 104314098 | Missense           | SNP | C  | A    | CSB25   | NM_001014431.1  | p.C77F    |
| KIAA0284    | 14 | 104422838 | 104422838 | Missense           | SNP | G  | C    | CSB1    | NM_015005.1     | p.D550H   |
| PLD4        | 14 | 104465191 | 104465191 | Missense           | SNP | C  | G    | CSB1    | NM_138790.2     | p.S76C    |
| AHNAK2      | 14 | 104479844 | 104479844 | Missense           | SNP | G  | A    | BRC29   | NM_138420.2     | p.A4330V  |
| OR4N4       | 15 | 19884670  | 19884670  | Missense           | SNP | C  | G    | BRC41   | NM_001005241.1  | p.I278M   |
| CYFIP1      | 15 | 20541623  | 20541623  | Silent             | SNP | G  | A    | BRC38   | NM_014608.1     | p.L934    |
| WHAMML1     | 15 | 20751724  | 20751724  | Missense           | SNP | G  | A    | BRC24   | ENST00000400153 | p.A80V    |
| SNORD116-1  | 15 | 22847781  | 22847781  | RNA                | SNP | C  | G    | BRC31   | NR_003316.1     | NULL      |
| SNORD115-40 | 15 | 23039865  | 23039865  | RNA                | SNP | G  | A    | BRC39   | NR_003355.1     | NULL      |
| ATP10A      | 15 | 23488026  | 23488026  | Missense           | SNP | C  | T    | CSB34   | NM_024490.3     | p.G1032R  |
| GABRB3      | 15 | 24376565  | 24376565  | Missense           | SNP | C  | T    | BRC40   | NM_000814.4     | p.A226T   |
| GABRB3      | 15 | 24417757  | 24417757  | Missense           | SNP | C  | A    | BRC7    | NM_000814.4     | p.M86I    |

|           |    |          |          |             |     |    |     |         |                 |          |
|-----------|----|----------|----------|-------------|-----|----|-----|---------|-----------------|----------|
| OCA2      | 15 | 25946757 | 25946757 | Missense    | SNP | C  | T   | BRC50   | NM_000275.2     | p.E124K  |
| HERC2     | 15 | 26147083 | 26147083 | Missense    | SNP | G  | C   | BRC50   | NM_004667.4     | p.I1780M |
| HERC2     | 15 | 26193172 | 26193172 | Silent      | SNP | G  | A   | BRC39   | NM_004667.4     | p.L220   |
| APBA2     | 15 | 27133389 | 27133389 | Missense    | SNP | C  | T   | BRC47   | NM_005503.1     | p.R4W    |
| APBA2     | 15 | 27181267 | 27181267 | Silent      | SNP | C  | T   | CSB16   | NM_005503.1     | p.F504   |
| TJP1      | 15 | 27783709 | 27783709 | Missense    | SNP | T  | C   | CSB16   | ENST00000400011 | p.M1645V |
| LOC727909 | 15 | 28633304 | 28633304 | Ins         | INS |    | 0 A | BRC40   | XM_001126407.2  | p.N23fs  |
| RYR3      | 15 | 31934374 | 31934374 | Missense    | SNP | T  | C   | BRC44   | NM_001036.3     | p.I4659T |
| LOC441722 | 15 | 33172571 | 33172571 | Missense    | SNP | C  | T   | CSB1    | XM_497450.1     | p.R200C  |
| MEIS2     | 15 | 35163285 | 35163285 | Missense    | SNP | C  | G   | CSB21   | NM_170675.2     | p.G245R  |
| TMCO5A    | 15 | 36016383 | 36016383 | Missense    | SNP | G  | A   | BRC47   | NM_152453.2     | p.E62K   |
| LOC728288 | 15 | 36152652 | 36152652 | Missense    | SNP | A  | C   | BRC15   | XM_001128351.2  | p.D138A  |
| SPRED1    | 15 | 36430589 | 36430589 | Missense    | SNP | G  | A   | BRC44   | NM_152594.2     | p.R256H  |
| THBS1     | 15 | 37672585 | 37672585 | Missense    | SNP | G  | C   | BRC39   | NM_003246.2     | p.E954Q  |
| PLCB2     | 15 | 38376104 | 38376105 | Del         | DEL | CA |     | 0 BRC42 | NM_004573.2     | p.E504fs |
| SPINT1    | 15 | 38932978 | 38932978 | Splice_Site | SNP | G  | C   | CSB1    | NM_181642.1     | e3-1     |
| VPS18     | 15 | 38982187 | 38982187 | Missense    | SNP | G  | T   | CSB14   | NM_020857.2     | p.A760S  |
| VPS18     | 15 | 38982314 | 38982314 | Missense    | SNP | A  | G   | CSB33   | NM_020857.2     | p.K802R  |
| LTK       | 15 | 39587637 | 39587637 | Missense    | SNP | A  | T   | CSB7    | NM_002344.1     | p.W391R  |
| SPTBN5    | 15 | 39959762 | 39959762 | Missense    | SNP | C  | A   | BRC15   | NM_016642.2     | p.G900V  |
| STARD9    | 15 | 40769177 | 40769177 | Missense    | SNP | G  | C   | BRC39   | XM_001129482.2  | p.E2318D |
| CDAN1     | 15 | 40815557 | 40815557 | Missense    | SNP | G  | A   | BRC31   | NM_138477.2     | p.S194F  |
| TTBK2     | 15 | 40856624 | 40856624 | Missense    | SNP | C  | T   | BRC39   | NM_173500.3     | p.D436N  |
| CCNDBP1   | 15 | 41271039 | 41271039 | Missense    | SNP | T  | A   | BRC18   | NM_012142.2     | p.L245H  |
| ZSCAN29   | 15 | 41445748 | 41445748 | Missense    | SNP | C  | G   | CSB1    | NM_152455.3     | p.E358D  |
| STRC      | 15 | 41682827 | 41682827 | Missense    | SNP | C  | G   | BRC18   | NM_153700.2     | p.E1484Q |
| STRC      | 15 | 41697394 | 41697394 | Missense    | SNP | C  | T   | CSB9    | NM_153700.2     | p.A173T  |
| CKMT1A    | 15 | 41778483 | 41778483 | Silent      | SNP | C  | T   | CSB22   | NM_001015001.1  | p.V386   |
| SPG11     | 15 | 42645461 | 42645461 | Silent      | SNP | G  | A   | BRC11   | NM_025137.3     | p.L2294  |
| SPG11     | 15 | 42652292 | 42652292 | Missense    | SNP | T  | A   | CSB5    | NM_025137.3     | p.N2075I |
| TRIM69    | 15 | 42839242 | 42839242 | Missense    | SNP | G  | C   | BRC39   | NM_182985.3     | p.E281Q  |
| C15orf43  | 15 | 43036449 | 43036449 | Missense    | SNP | C  | T   | BRC50   | NM_152448.1     | p.S43L   |
| DUOX1     | 15 | 43230616 | 43230616 | Silent      | SNP | C  | G   | CSB1    | NM_017434.3     | p.P964   |
| SEMA6D    | 15 | 45842554 | 45842554 | Silent      | SNP | C  | T   | CSB15   | NM_153618.1     | p.F236   |

|         |    |          |          |                         |     |        |   |         |                 |                      |
|---------|----|----------|----------|-------------------------|-----|--------|---|---------|-----------------|----------------------|
| MYEF2   | 15 | 46231756 | 46231756 | Missense                | SNP | G      | A | BRC50   | NM_016132.3     | p.P369S              |
| SLC12A1 | 15 | 46347150 | 46347150 | Missense                | SNP | C      | T | BRC8    | NM_000338.2     | p.A752V              |
| ATP8B4  | 15 | 47939961 | 47939961 | Missense                | SNP | G      | A | BRC16   | NM_024837.2     | p.R1101C             |
| HDC     | 15 | 48322481 | 48322481 | Silent                  | SNP | G      | T | BRC11   | NM_002112.2     | p.L419               |
| TRPM7   | 15 | 48693209 | 48693209 | Missense                | SNP | G      | A | BRC39   | NM_017672.3     | p.P586L              |
| DMXL2   | 15 | 49560165 | 49560165 | Nonsense                | SNP | G      | A | BRC16   | NM_015263.2     | p.R2144*             |
| DMXL2   | 15 | 49615729 | 49615729 | Missense                | SNP | C      | G | BRC39   | NM_015263.2     | p.R747P              |
| DMXL2   | 15 | 49617942 | 49617942 | Splice_Site             | SNP | C      | A | CSB17   | NM_015263.2     | e10-1                |
| SCG3    | 15 | 49768753 | 49768753 | Missense                | SNP | G      | A | BRC47   | NM_013243.2     | p.V196I              |
| LEO1    | 15 | 50045990 | 50045990 | Missense                | SNP | G      | A | BRC11   | NM_138792.2     | p.S21F               |
| MYO5A   | 15 | 50396679 | 50396679 | Missense                | SNP | C      | T | BRC50   | NM_000259.3     | p.R1731H             |
| MYO5A   | 15 | 50487553 | 50487553 | Missense                | SNP | C      | G | BRC29   | NM_000259.3     | p.R278P              |
| WDR72   | 15 | 51695332 | 51695332 | Missense                | SNP | G      | T | CSB15   | NM_182758.2     | p.A788D              |
| PYGO1   | 15 | 53626179 | 53626179 | Silent                  | SNP | G      | A | BRC13   | NM_015617.1     | p.P198               |
| PRTG    | 15 | 53703990 | 53703990 | Missense                | SNP | A      | T | CSB28   | NM_173814.4     | p.S979T              |
| NEDD4   | 15 | 53995017 | 53995017 | Missense                | SNP | G      | C | CSB1    | NM_198400.2     | p.I435M              |
| NEDD4   | 15 | 53995887 | 53995887 | Silent                  | SNP | G      | T | BRC20   | NM_198400.2     | p.A145               |
| SLTM    | 15 | 56993187 | 56993187 | Missense                | SNP | C      | A | BRC41   | NM_024755.1     | p.D106Y              |
| MYO1E   | 15 | 57297432 | 57297432 | Missense                | SNP | C      | T | BRC41   | NM_004998.2     | p.D353N              |
| NARG2   | 15 | 58527595 | 58527595 | Nonsense                | SNP | C      | A | CSB9    | NM_024611.1     | p.E721*              |
| TLN2    | 15 | 60919776 | 60919776 | Missense                | SNP | C      | A | BRC18   | NM_015059.2     | p.L2515M             |
| CA12    | 15 | 61425855 | 61425855 | Silent                  | SNP | G      | A | BRC50   | NM_001218.3     | p.L71                |
| HERC1   | 15 | 61774116 | 61774116 | Missense                | SNP | G      | C | BRC39   | NM_003922.3     | p.Q1718E             |
| PPIB    | 15 | 62236038 | 62236038 | Missense<br>Frame Shift | SNP | G      | A | BRC37   | NM_000942.4     | p.T156I              |
| ZNF609  | 15 | 62757545 | 62757546 | Del                     | DEL | CC     |   | 0 BRC41 | NM_015042.1     | p.P1194fs            |
| PDCD7   | 15 | 63212436 | 63212436 | Missense                | SNP | C      | T | BRC28   | NM_005707.1     | p.R246Q              |
| TIPIN   | 15 | 64416361 | 64416361 | Missense                | SNP | C      | T | CSB1    | NM_017858.2     | p.E299K              |
| ITGA11  | 15 | 66410490 | 66410490 | Nonsense                | SNP | G      | C | CSB1    | NM_001004439.1  | p.S595*              |
| UACA    | 15 | 68744130 | 68744130 | Silent                  | SNP | C      | T | BRC18   | NM_018003.1     | p.G1346              |
| NR2E3   | 15 | 69891744 | 69891744 | Missense                | SNP | G      | A | BRC47   | ENST00000326995 | p.D196N              |
| MYO9A   | 15 | 70039308 | 70039308 | Missense                | SNP | G      | A | CSB8    | NM_006901.2     | p.H724Y              |
| HEXA    | 15 | 70428638 | 70428638 | Silent                  | SNP | C      | T | BRC31   | NM_000520.4     | p.L274               |
| CCDC33  | 15 | 72359442 | 72359442 | Nonsense                | SNP | C      | G | CSB1    | NM_025055.3     | p.S282*<br>p.ED246in |
| SEMA7A  | 15 | 72496030 | 72496035 | In Frame Del            | DEL | TCCTCT |   | 0 BRC32 | NM_003612.1     | Frame del            |



|         |    |          |          |          |     |   |   |       |                |          |
|---------|----|----------|----------|----------|-----|---|---|-------|----------------|----------|
| POLR3K  | 16 | 41638    | 41638    | Missense | SNP | T | G | BRC35 | NM_016310.2    | p.N40T   |
| AXIN1   | 16 | 336251   | 336251   | Missense | SNP | C | T | CSB1  | NM_003502.2    | p.R259K  |
| FBXL16  | 16 | 685716   | 685716   | Missense | SNP | G | C | CSB27 | NM_153350.2    | p.T281R  |
| SOX8    | 16 | 975292   | 975292   | Missense | SNP | G | A | CSB9  | NM_014587.3    | p.A416T  |
| CACNA1H | 16 | 1195139  | 1195139  | Missense | SNP | G | C | CSB1  | NM_021098.1    | p.E826Q  |
| UNKL    | 16 | 1404051  | 1404051  | Silent   | SNP | C | T | CSB33 | NM_001037125.1 | p.L28    |
| CRAMP1L | 16 | 1646329  | 1646329  | Missense | SNP | G | A | CSB1  | NM_020825.3    | p.E320K  |
| E4F1    | 16 | 2218477  | 2218477  | Silent   | SNP | G | A | CSB1  | NM_004424.3    | p.P87    |
| E4F1    | 16 | 2223903  | 2223903  | Nonsense | SNP | C | G | BRC11 | NM_004424.3    | p.S429*  |
| RNPS1   | 16 | 2254277  | 2254277  | Nonsense | SNP | G | C | BRC39 | NM_006711.2    | p.S43*   |
| CCNF    | 16 | 2443483  | 2443483  | Silent   | SNP | C | T | CSB1  | NM_001761.2    | p.L553   |
| TBC1D24 | 16 | 2486633  | 2486633  | Silent   | SNP | C | T | BRC18 | NM_020705.1    | p.C161   |
| PRSS27  | 16 | 2702693  | 2702693  | Missense | SNP | G | A | BRC51 | NM_031948.3    | p.H268Y  |
| SRRM2   | 16 | 2752102  | 2752102  | Missense | SNP | A | T | BRC41 | NM_016333.3    | p.R524S  |
| SRRM2   | 16 | 2756708  | 2756708  | Nonsense | SNP | C | T | BRC47 | NM_016333.3    | p.R2060* |
| THOC6   | 16 | 3017201  | 3017201  | Silent   | SNP | C | T | CSB6  | NM_024339.1    | p.L243   |
| IL32    | 16 | 3059298  | 3059298  | Missense | SNP | C | T | BRC9  | NM_001012631.1 | p.R170W  |
| MEFV    | 16 | 3233200  | 3233200  | Missense | SNP | C | T | BRC50 | NM_000243.2    | p.G763E  |
| MEFV    | 16 | 3239584  | 3239584  | Nonsense | SNP | G | A | BRC51 | NM_000243.2    | p.Q370*  |
| ZNF174  | 16 | 3392273  | 3392273  | Missense | SNP | G | A | CSB27 | NM_003450.2    | p.V90M   |
| BTBD12  | 16 | 3587858  | 3587858  | Missense | SNP | G | A | CSB12 | NM_032444.2    | p.A436V  |
| CREBBP  | 16 | 3719616  | 3719616  | Silent   | SNP | C | T | CSB1  | NM_004380.1    | p.K1811  |
| GLIS2   | 16 | 4322446  | 4322446  | Missense | SNP | C | A | BRC29 | NM_032575.2    | p.P55Q   |
| NMRAL1  | 16 | 4456284  | 4456284  | Missense | SNP | C | G | CSB1  | NM_020677.2    | p.G134R  |
| ZNF500  | 16 | 4742911  | 4742911  | Missense | SNP | G | A | CSB29 | NM_021646.1    | p.P304S  |
| N-PAC   | 16 | 4801782  | 4801782  | Missense | SNP | C | G | BRC31 | NM_032569.3    | p.K435N  |
| PPL     | 16 | 4874376  | 4874376  | Silent   | SNP | C | T | CSB10 | NM_002705.4    | p.L1427  |
| SEC14L5 | 16 | 4990903  | 4990903  | Missense | SNP | C | A | CSB5  | NM_014692.1    | p.T369K  |
| SEC14L5 | 16 | 5004916  | 5004916  | Missense | SNP | G | A | CSB3  | NM_014692.1    | p.A679T  |
| NAGPA   | 16 | 5021832  | 5021832  | Silent   | SNP | C | T | BRC13 | NM_016256.2    | p.L199   |
| A2BP1   | 16 | 7508291  | 7508291  | Missense | SNP | A | G | BRC4  | NM_145891.1    | p.T77A   |
| A2BP1   | 16 | 7569799  | 7569799  | Missense | SNP | C | T | CSB12 | NM_145891.1    | p.P117L  |
| GRIN2A  | 16 | 9766019  | 9766019  | Missense | SNP | G | T | CSB26 | NM_000833.3    | p.N961K  |
| TXNDC11 | 16 | 11680639 | 11680639 | Silent   | SNP | G | A | BRC4  | NM_015914.5    | p.T930   |
| SNX29   | 16 | 12526190 | 12526190 | Missense | SNP | C | T | CSB24 | NM_001080530.2 | p.P385L  |



|          |    |          |          |                    |     |     |   |         |                 |                                   |
|----------|----|----------|----------|--------------------|-----|-----|---|---------|-----------------|-----------------------------------|
| NOMO1    | 16 | 14853887 | 14853887 | Missense           | SNP | G   | C | CSB1    | NM_014287.3     | p.E228Q                           |
| KIAA0430 | 16 | 15605614 | 15605614 | Missense           | SNP | T   | C | BRC9    | NM_014647.2     | p.E1442G                          |
| MYH11    | 16 | 15722333 | 15722341 | In Frame Del       | DEL | CT  |   | 0 CSB1  | NM_001040114.1  | p.ELE1557in<br>Frame del          |
| ABCC1    | 16 | 16142611 | 16142611 | Missense           | SNP | G   | T | BRC44   | NM_004996.3     | p.S1523I<br>p.I403in<br>Frame del |
| NOMO3    | 16 | 16257503 | 16257505 | In Frame Del       | DEL | ATT |   | 0 BRC33 | NM_001004067.2  | Frame del                         |
| SMG1     | 16 | 18736175 | 18736175 | Missense           | SNP | G   | A | CSB1    | NM_015092.4     | p.S3338L                          |
| SMG1     | 16 | 18751782 | 18751782 | Missense           | SNP | G   | C | BRC39   | NM_015092.4     | p.H2925D                          |
| SMG1     | 16 | 18757499 | 18757499 | Missense           | SNP | G   | C | CSB2    | NM_015092.4     | p.S2320C                          |
| CP110    | 16 | 19460870 | 19460870 | Missense           | SNP | C   | T | BRC39   | NM_014711.4     | p.S737L                           |
| ACSM2A   | 16 | 20390453 | 20390453 | Missense           | SNP | T   | A | CSB26   | NM_001010845.2  | p.L279I                           |
| ACSM1    | 16 | 20543035 | 20543035 | Missense           | SNP | C   | A | BRC5    | NM_052956.2     | p.V511L                           |
| ACSM3    | 16 | 20688995 | 20688995 | Missense           | SNP | G   | A | CSB24   | NM_005622.3     | p.M46I                            |
| DNAH3    | 16 | 20863462 | 20863462 | Missense           | SNP | G   | C | CSB1    | NM_017539.1     | p.L3790V                          |
| DNAH3    | 16 | 21025336 | 21025336 | Frame Shift<br>Del | DEL | G   |   | 0 CSB3  | NM_017539.1     | p.L754fs                          |
| CRYM     | 16 | 21197061 | 21197061 | Missense           | SNP | G   | T | CSB28   | NM_001888.1     | p.P5T                             |
| POLR3E   | 16 | 22250994 | 22250994 | Missense           | SNP | A   | T | CSB9    | NM_018119.2     | p.D686V                           |
| PALB2    | 16 | 23526814 | 23526814 | Silent             | SNP | C   | A | BRC16   | NM_024675.3     | p.L1074                           |
| PRKCB    | 16 | 24109971 | 24109971 | Missense           | SNP | C   | G | BRC18   | NM_002738.6     | p.I594M                           |
| HS3ST4   | 16 | 26054572 | 26054572 | Silent             | SNP | G   | A | BRC39   | ENST00000331351 | p.V29I                            |
| GTF3C1   | 16 | 27380209 | 27380209 | Missense           | SNP | G   | A | BRC6    | NM_001520.3     | p.P2098L                          |
| GTF3C1   | 16 | 27401904 | 27401904 | Missense           | SNP | C   | A | BRC6    | NM_001520.3     | p.D1349Y                          |
| ATP2A1   | 16 | 28819492 | 28819492 | Silent             | SNP | G   | A | CSB1    | NM_173201.3     | p.G618                            |
| SPN      | 16 | 29582665 | 29582665 | Missense           | SNP | C   | T | BRC23   | NM_001030288.1  | p.P39S                            |
| C16orf53 | 16 | 29736084 | 29736084 | Missense           | SNP | G   | A | BRC48   | NM_024516.3     | p.D179N                           |
| MVP      | 16 | 29763406 | 29763406 | Missense           | SNP | G   | A | BRC7    | NM_005115.3     | p.A576T                           |
| SEZ6L2   | 16 | 29814606 | 29814606 | Silent             | SNP | G   | C | CSB27   | NM_201575.1     | p.T196                            |
| FAM57B   | 16 | 29945473 | 29945473 | Silent             | SNP | G   | C | CSB1    | NM_031478.4     | p.L134                            |
| MAPK3    | 16 | 30037236 | 30037236 | Missense           | SNP | C   | T | CSB25   | NM_002746.1     | p.A160T                           |
| CD2BP2   | 16 | 30273455 | 30273455 | Nonsense           | SNP | C   | A | CSB1    | NM_006110.2     | p.E17*<br>p.E119in<br>Frame del   |
| ZNF785   | 16 | 30502243 | 30502245 | In Frame Del       | DEL | CTC |   | 0 BRC19 | NM_152458.5     | Frame del                         |
| SRCAP    | 16 | 30642754 | 30642754 | Missense           | SNP | C   | T | BRC47   | NM_006662.2     | p.S1503L                          |
| ZNF629   | 16 | 30701433 | 30701433 | Missense           | SNP | C   | A | CSB31   | NM_001080417.1  | p.V573L                           |
| ZNF629   | 16 | 30702709 | 30702709 | Silent             | SNP | C   | T | CSB1    | NM_001080417.1  | p.E147                            |



|                     |    |          |          |                    |     |     |   |         |                 |                                  |
|---------------------|----|----------|----------|--------------------|-----|-----|---|---------|-----------------|----------------------------------|
| SETD1A              | 16 | 30888464 | 30888464 | Missense           | SNP | G   | A | CSB1    | NM_014712.1     | p.R990Q                          |
| STX1B               | 16 | 30912008 | 30912008 | Missense           | SNP | C   | T | BRC12   | NM_052874.3     | p.E244K                          |
| MYST1               | 16 | 31049401 | 31049401 | Missense           | SNP | G   | A | BRC39   | NM_182958.1     | p.R377Q                          |
| LOC100129315        | 16 | 31567479 | 31567479 | Missense           | SNP | C   | T | BRC18   | XM_001717900.1  | p.P117S                          |
| LOC401847           | 16 | 33477678 | 33477678 | Silent             | SNP | C   | T | BRC47   | XM_001718104.1  | p.D105                           |
| ABCC11              | 16 | 46821886 | 46821886 | Missense           | SNP | C   | T | BRC10   | NM_032583.3     | p.A67T                           |
| PAPD5               | 16 | 48814781 | 48814781 | Missense           | SNP | G   | A | CSB1    | NM_001040284.1  | p.E231K                          |
| NOD2                | 16 | 49299280 | 49299280 | Missense           | SNP | T   | G | BRC5    | NM_022162.1     | p.L185R                          |
| NOD2                | 16 | 49303213 | 49303213 | Silent             | SNP | C   | T | CSB31   | NM_022162.1     | p.F630                           |
| RBL2                | 16 | 52030535 | 52030535 | Missense           | SNP | G   | C | BRC44   | NM_005611.3     | p.R116T                          |
| IRX5                | 16 | 53524223 | 53524223 | Missense           | SNP | G   | A | CSB6    | NM_005853.5     | p.E188K                          |
| SLC6A2              | 16 | 54276593 | 54276593 | Missense           | SNP | C   | T | BRC31   | NM_001043.2     | p.H228Y                          |
| SLC6A2              | 16 | 54290968 | 54290968 | Silent             | SNP | A   | T | BRC24   | NM_001043.2     | p.G497                           |
| CES1                | 16 | 54404393 | 54404393 | Nonsense           | SNP | G   | A | BRC50   | NM_001025195.1  | p.Q337*                          |
| GNAO1               | 16 | 54920078 | 54920078 | Missense           | SNP | G   | A | CSB3    | NM_020988.2     | p.R113Q                          |
| NUP93               | 16 | 55339700 | 55339700 | Missense           | SNP | G   | A | BRC34   | NM_014669.3     | p.E14K                           |
| GPR56               | 16 | 56247979 | 56247979 | Missense           | SNP | A   | T | CSB2    | NM_005682.1     | p.E372D                          |
| CCDC135             | 16 | 56298906 | 56298906 | Missense           | SNP | G   | A | BRC22   | NM_032269.5     | p.G298S                          |
| KATNB1              | 16 | 56344635 | 56344635 | Missense           | SNP | G   | A | CSB14   | NM_005886.2     | p.R334Q                          |
| CDH5                | 16 | 64980836 | 64980836 | Missense           | SNP | G   | C | BRC44   | NM_001795.3     | p.D231H                          |
| CBFB                | 16 | 65658114 | 65658114 | Missense           | SNP | A   | G | CSB26   | NM_022845.2     | p.N104S                          |
| CBFB                | 16 | 65673635 | 65673635 | Nonsense           | SNP | C   | T | CSB27   | NM_022845.2     | p.Q140*                          |
| E2F4                | 16 | 65784245 | 65784245 | Missense           | SNP | G   | T | CSB34   | NM_001950.3     | p.E72D                           |
| PLEKHG4             | 16 | 65876556 | 65876556 | Missense           | SNP | C   | A | BRC47   | NM_015432.1     | p.A711D<br>p.S272in<br>Frame del |
| CTCF                | 16 | 66203385 | 66203387 | In Frame Del       | DEL | GCA |   | 0 BRC24 | NM_006565.2     |                                  |
| CTCF                | 16 | 66203447 | 66203447 | Missense           | SNP | A   | G | BRC36   | NM_006565.2     | p.R292G                          |
| NUTF2               | 16 | 66462218 | 66462218 | Silent             | SNP | C   | T | BRC37   | NM_005796.1     | p.P95                            |
| ENSG0000022152<br>6 | 16 | 66469091 | 66469091 | RNA                | SNP | A   | G | CSB25   | ENST00000408599 | NULL                             |
| EDC4                | 16 | 66472773 | 66472773 | Missense           | SNP | C   | T | BRC7    | NM_014329.3     | p.S914F                          |
| ZFP90               | 16 | 67155905 | 67155905 | Missense           | SNP | G   | C | BRC11   | NM_133458.2     | p.E572Q                          |
| CDH3                | 16 | 67283143 | 67283143 | Silent             | SNP | C   | T | BRC7    | NM_001793.4     | p.S605                           |
| CDH1                | 16 | 67393289 | 67393289 | Frame Shift<br>Del | DEL | C   |   | 0 CSB14 | NM_004360.3     | p.H128fs                         |
| CDH1                | 16 | 67399852 | 67399852 | Missense           | SNP | G   | A | BRC39   | NM_004360.3     | p.E138K                          |

|              |    |          |          |                            |     |             |   |   |       |                 |  |            |
|--------------|----|----------|----------|----------------------------|-----|-------------|---|---|-------|-----------------|--|------------|
|              |    |          |          |                            |     | GATCCT<br>G |   |   |       |                 |  |            |
|              |    |          |          |                            |     | AGCTCC      |   |   |       |                 |  |            |
| CDH1         | 16 | 67403177 | 67403190 | Frame Shift<br>Del         | DEL | C           |   | 0 | CSB31 | NM_004360.3     |  | p.D308fs   |
| CDH1         | 16 | 67403226 | 67403230 | Frame Shift<br>Del         | DEL | GAGTC       |   | 0 | CSB12 | NM_004360.3     |  | p.G324fs   |
| CDH1         | 16 | 67403668 | 67403668 | Splice_Site<br>Frame Shift | SNP | G           | A |   | BRC38 | NM_004360.3     |  | e8+1       |
| CDH1         | 16 | 67407118 | 67407118 | Del                        | DEL | C           |   | 0 | CSB30 | NM_004360.3     |  | p.Y508fs   |
| CDH1         | 16 | 67410696 | 67410696 | Nonsense                   | SNP | G           | A |   | CSB1  | NM_004360.3     |  | p.W526*    |
|              |    |          |          |                            |     | ATCCGG      |   |   |       |                 |  |            |
|              |    |          |          |                            |     | A           |   |   |       |                 |  | p.NPDTGA53 |
|              |    |          |          |                            |     | CACTGG      |   |   |       |                 |  | 6in Frame  |
| CDH1         | 16 | 67410725 | 67410739 | In Frame Del               | DEL | TG          |   | 0 | CSB28 | NM_004360.3     |  | delT       |
| CIRH1A       | 16 | 67751845 | 67751845 | Silent                     | SNP | C           | T |   | BRC18 | NM_032830.2     |  | p.V510     |
| VPS4A        | 16 | 67910808 | 67910808 | Missense<br>Frame Shift    | SNP | C           | T |   | BRC4  | NM_013245.2     |  | p.R161W    |
| AARS         | 16 | 68850558 | 68850559 | Del                        | DEL | TG          |   | 0 | CSB9  | NM_001605.2     |  | p.T606fs   |
| ST3GAL2      | 16 | 68973144 | 68973144 | Silent                     | SNP | G           | A |   | BRC5  | NM_006927.3     |  | p.I334     |
| HYDIN        | 16 | 69401406 | 69401406 | Silent                     | SNP | C           | T |   | CSB1  | NM_032821.2     |  | p.T4887    |
| TAT          | 16 | 70167695 | 70167695 | Missense                   | SNP | G           | A |   | CSB1  | NM_000353.2     |  | p.S42F     |
| PKD1L3       | 16 | 70575538 | 70575538 | Silent                     | SNP | G           | A |   | BRC33 | ENST00000335106 |  | p.S288     |
| LOC440386    | 16 | 72958334 | 72958334 | RNA                        | SNP | G           | C |   | BRC50 | XR_040492.1     |  | NULL       |
|              |    |          |          |                            |     |             |   |   |       |                 |  | p.Q192in   |
| NPIPL2       | 16 | 72982901 | 72982903 | In Frame Del               | DEL | CAA         |   | 0 | CSB30 | ENST00000355290 |  | Frame del  |
| WDR59        | 16 | 73515363 | 73515363 | Missense                   | SNP | G           | A |   | BRC18 | NM_030581.3     |  | p.L231F    |
| SDR42E1      | 16 | 80590218 | 80590218 | Silent                     | SNP | C           | T |   | BRC39 | NM_145168.2     |  | p.*394     |
| NECAB2       | 16 | 82569609 | 82569609 | Missense                   | SNP | G           | C |   | BRC39 | NM_019065.2     |  | p.E96Q     |
| LOC100132344 | 16 | 83187209 | 83187209 | Missense                   | SNP | G           | C |   | BRC11 | XM_001726866.1  |  | p.E98Q     |
| FAM92B       | 16 | 83690316 | 83690316 | Silent                     | SNP | G           | A |   | CSB1  | NM_198491.1     |  | p.L297     |
| ACSF3        | 16 | 87694670 | 87694670 | Missense                   | SNP | G           | A |   | BRC13 | NM_174917.1     |  | p.R27K     |
| ANKRD11      | 16 | 87874800 | 87874800 | Nonsense                   | SNP | G           | C |   | BRC44 | NM_013275.4     |  | p.S1884*   |
| ANKRD11      | 16 | 87874972 | 87874972 | Missense                   | SNP | G           | A |   | CSB15 | NM_013275.4     |  | p.P1827S   |
| TUBB3        | 16 | 88528816 | 88528816 | Silent                     | SNP | C           | T |   | BRC39 | NM_006086.2     |  | p.I152     |
| VPS53        | 17 | 477238   | 477238   | Silent                     | SNP | C           | T |   | BRC50 | NM_018289.1     |  | p.E271     |
| SLC43A2      | 17 | 1440976  | 1440976  | Missense                   | SNP | C           | A |   | BRC49 | NM_152346.1     |  | p.M316I    |
| SLC43A2      | 17 | 1441441  | 1441441  | Missense                   | SNP | G           | A |   | BRC35 | NM_152346.1     |  | p.T268M    |
| LOC727910    | 17 | 1557955  | 1557955  | Silent                     | SNP | C           | T |   | BRC18 | XM_001126126.2  |  | p.G396     |
| LOC727910    | 17 | 1558057  | 1558057  | Missense                   | SNP | C           | T |   | BRC18 | XM_001126126.2  |  | p.M362I    |

|          |    |         |         |                    |     |   |   |         |             |          |
|----------|----|---------|---------|--------------------|-----|---|---|---------|-------------|----------|
| RPA1     | 17 | 1730671 | 1730671 | Missense           | SNP | G | T | BRC24   | NM_002945.3 | p.V393L  |
| SMG6     | 17 | 1918876 | 1918876 | Missense           | SNP | T | A | CSB1    | NM_017575.4 | p.S1261C |
| SRR      | 17 | 2168896 | 2168896 | Nonsense           | SNP | C | T | CSB27   | NM_021947.1 | p.Q108*  |
| KIAA0664 | 17 | 2546483 | 2546483 | Missense           | SNP | G | A | BRC39   | NM_015229.3 | p.S723L  |
| SPATA22  | 17 | 3319339 | 3319339 | Missense           | SNP | G | C | BRC39   | NM_032598.3 | p.R11G   |
| ITGAE    | 17 | 3607904 | 3607904 | Splice_Site        | SNP | T | C | BRC39   | NM_002208.4 | e9-2     |
| ITGAE    | 17 | 3611978 | 3611978 | Missense           | SNP | G | A | BRC7    | NM_002208.4 | p.R99W   |
| CYB5D2   | 17 | 4007112 | 4007112 | Missense           | SNP | C | T | CSB1    | NM_144611.3 | p.S261F  |
| ALOX15   | 17 | 4482978 | 4482978 | Silent             | SNP | C | T | BRC20   | NM_001140.3 | p.V489   |
| CAMTA2   | 17 | 4822526 | 4822526 | Missense           | SNP | G | A | BRC39   | NM_015099.2 | p.P588S  |
| KIF1C    | 17 | 4844283 | 4844283 | Silent             | SNP | G | A | CSB1    | NM_006612.4 | p.V6     |
| ZNF594   | 17 | 5026629 | 5026629 | Silent             | SNP | G | A | CSB1    | NM_032530.1 | p.F549   |
| RABEP1   | 17 | 5205301 | 5205301 | Missense           | SNP | C | A | BRC18   | NM_004703.1 | p.F390L  |
| NUP88    | 17 | 5239026 | 5239026 | Splice_Site        | SNP | C | T | BRC40   | NM_002532.3 | e9-1     |
| WSCD1    | 17 | 5939165 | 5939165 | Silent             | SNP | C | T | CSB21   | NM_015253.1 | p.R249   |
| PHF23    | 17 | 7080087 | 7080087 | Missense           | SNP | G | C | BRC50   | NM_024297.2 | p.P295A  |
| GPS2     | 17 | 7157429 | 7157429 | Missense           | SNP | G | C | CSB1    | NM_004489.4 | p.Q240E  |
| MPDU1    | 17 | 7430114 | 7430114 | Missense           | SNP | C | T | CSB24   | NM_004870.3 | p.P99L   |
| TP53     | 17 | 7513676 | 7513676 | Missense           | SNP | C | G | BRC44   | NM_000546.4 | p.K386N  |
| TP53     | 17 | 7514669 | 7514669 | Silent             | SNP | C | A | BRC44   | NM_000546.4 | p.G361   |
| TP53     | 17 | 7514755 | 7514755 | Frame Shift<br>Del | DEL | G |   | 0 BRC37 | NM_000546.4 | p.R333fs |
| TP53     | 17 | 7517580 | 7517580 | Nonsense           | SNP | G | A | CSB24   | NM_000546.4 | p.Q331*  |
| TP53     | 17 | 7517810 | 7517810 | Missense           | SNP | C | T | BRC44   | NM_000546.4 | p.E285K  |
| TP53     | 17 | 7517824 | 7517824 | Missense           | SNP | C | T | BRC4    | NM_000546.4 | p.R280K  |
| TP53     | 17 | 7517833 | 7517833 | Missense           | SNP | C | A | BRC31   | NM_000546.4 | p.C277F  |
| TP53     | 17 | 7517845 | 7517845 | Missense           | SNP | C | A | BRC20   | NM_000546.4 | p.R273L  |
| TP53     | 17 | 7517846 | 7517846 | Missense           | SNP | G | A | CSB33   | NM_000546.4 | p.R273C  |
| TP53     | 17 | 7518264 | 7518264 | Missense           | SNP | G | A | CSB15   | NM_000546.4 | p.R248W  |
| TP53     | 17 | 7518293 | 7518293 | Missense           | SNP | C | T | BRC29   | NM_000546.4 | p.C238Y  |
| TP53     | 17 | 7518928 | 7518928 | Missense           | SNP | C | T | BRC51   | NM_000546.4 | p.V216M  |
| TP53     | 17 | 7518934 | 7518934 | Missense           | SNP | G | C | BRC47   | NM_000546.4 | p.H214D  |
| TP53     | 17 | 7518936 | 7518936 | Missense           | SNP | C | A | BRC13   | NM_000546.4 | p.R213L  |
| TP53     | 17 | 7518948 | 7518948 | Missense           | SNP | C | A | BRC44   | NM_000546.4 | p.R209I  |
| TP53     | 17 | 7519251 | 7519251 | Missense           | SNP | C | A | BRC16   | NM_000546.4 | p.C135F  |

|              |    |          |          |              |     |         |   |       |                 |             |
|--------------|----|----------|----------|--------------|-----|---------|---|-------|-----------------|-------------|
| TP53         | 17 | 7520036  | 7520036  | Splice_Site  | SNP | C       | A | CSB9  | NM_000546.4     | e3+1        |
| TP53         | 17 | 7520112  | 7520112  | Silent       | SNP | C       | T | BRC44 | NM_000546.4     | p.Q100      |
|              |    |          |          |              |     | TCTGC   |   |       |                 | p.RENL672in |
| DNAH2        | 17 | 7601239  | 7601250  | In Frame Del | DEL | GTGAAAA | 0 | BRC39 | NM_020877.2     | Frame del   |
| DNAH2        | 17 | 7642243  | 7642243  | Missense     | SNP | G       | T | BRC7  | NM_020877.2     | p.M2758I    |
| KCNAB3       | 17 | 7767150  | 7767150  | Nonsense     | SNP | T       | A | BRC23 | NM_004732.2     | p.K404*     |
| ALOXE3       | 17 | 7958647  | 7958647  | Missense     | SNP | C       | T | BRC38 | NM_021628.2     | p.G187E     |
| RANGRF       | 17 | 8133077  | 8133077  | Silent       | SNP | C       | G | BRC31 | NM_016492.3     | p.L52       |
| MYH10        | 17 | 8336403  | 8336403  | Silent       | SNP | C       | T | BRC39 | NM_005964.1     | p.Q1505     |
| CCDC42       | 17 | 8585709  | 8585709  | Silent       | SNP | G       | A | CSB8  | NM_144681.1     | p.N100      |
| MYH8         | 17 | 10259420 | 10259420 | Missense     | SNP | G       | C | BRC39 | NM_002472.2     | p.L219V     |
| MYH4         | 17 | 10310595 | 10310595 | Nonsense     | SNP | C       | A | CSB6  | NM_017533.2     | p.E65*      |
| MYH1         | 17 | 10340587 | 10340587 | Missense     | SNP | G       | C | BRC18 | NM_005963.3     | p.S1554C    |
| MYH1         | 17 | 10349909 | 10349909 | Missense     | SNP | G       | A | BRC31 | NM_005963.3     | p.R707C     |
| MYH2         | 17 | 10383363 | 10383363 | Missense     | SNP | C       | T | BRC39 | NM_001100112.1  | p.V434I     |
| DNAH9        | 17 | 11513414 | 11513414 | Silent       | SNP | C       | G | BRC50 | NM_001372.3     | p.V977      |
| DNAH9        | 17 | 11601667 | 11601667 | Missense     | SNP | G       | A | CSB1  | NM_001372.3     | p.E2310K    |
| ZNF18        | 17 | 11822340 | 11822340 | Nonsense     | SNP | G       | A | CSB30 | NM_144680.2     | p.Q437*     |
| MAP2K4       | 17 | 11899036 | 11899036 | Splice_Site  | SNP | G       | T | BRC3  | NM_003010.2     | e2+3        |
| MAP2K4       | 17 | 11951869 | 11951869 | Missense     | SNP | C       | T | BRC50 | NM_003010.2     | p.S184L     |
| LOC100131109 | 17 | 14148096 | 14148096 | Nonsense     | SNP | G       | A | BRC31 | XM_001722018.1  | p.R128*     |
| TEKT3        | 17 | 15175368 | 15175368 | Missense     | SNP | C       | G | CSB1  | NM_031898.2     | p.R87T      |
| NCOR1        | 17 | 15878884 | 15878884 | Nonsense     | SNP | G       | C | BRC24 | NM_006311.2     | p.S2352*    |
| LOC100133337 | 17 | 16226471 | 16226471 | Missense     | SNP | C       | T | CSB1  | XM_001722328.1  | p.D60N      |
| C17orf39     | 17 | 17889210 | 17889210 | Missense     | SNP | C       | T | BRC19 | NM_024052.4     | p.L155F     |
| FLII         | 17 | 18092760 | 18092760 | Missense     | SNP | C       | G | BRC19 | NM_002018.2     | p.R673S     |
| MFAP4        | 17 | 19231013 | 19231013 | Silent       | SNP | C       | G | CSB1  | ENST00000395592 | p.L4        |
| SLC47A2      | 17 | 19546530 | 19546530 | Missense     | SNP | G       | T | BRC39 | NM_152908.1     | p.H418N     |
| ULK2         | 17 | 19645785 | 19645785 | Silent       | SNP | G       | A | BRC50 | NM_014683.1     | p.F446      |
| ULK2         | 17 | 19660670 | 19660670 | Silent       | SNP | G       | A | BRC32 | NM_014683.1     | p.I360      |
| DHRS7B       | 17 | 21027675 | 21027675 | Silent       | SNP | C       | T | CSB1  | NM_015510.3     | p.V162      |
| KIAA0100     | 17 | 23984207 | 23984207 | Missense     | SNP | G       | C | CSB1  | NM_014680.2     | p.L1229V    |
| KIAA0100     | 17 | 23984497 | 23984497 | Missense     | SNP | G       | C | CSB1  | NM_014680.2     | p.S1172C    |
| KIAA0100     | 17 | 23984817 | 23984817 | Silent       | SNP | G       | C | CSB1  | NM_014680.2     | p.L1114     |
| TLCD1        | 17 | 24076655 | 24076655 | Missense     | SNP | G       | C | CSB1  | NM_138463.2     | p.S83C      |

|           |    |          |          |          |     |   |   |         |                |          |
|-----------|----|----------|----------|----------|-----|---|---|---------|----------------|----------|
| MYO18A    | 17 | 24437631 | 24437631 | Missense | SNP | C | T | BRC41   | NM_078471.3    | p.A1935T |
| TAOK1     | 17 | 24853832 | 24853832 | Nonsense | SNP | C | T | BRC51   | NM_020791.1    | p.R435*  |
| SSH2      | 17 | 25006708 | 25006708 | Missense | SNP | C | T | CSB1    | NM_033389.2    | p.R332Q  |
| EFCAB5    | 17 | 25320373 | 25320373 | Missense | SNP | C | G | BRC14   | NM_198529.1    | p.P210R  |
| EFCAB5    | 17 | 25404924 | 25404924 | Missense | SNP | G | A | BRC24   | NM_198529.1    | p.R609H  |
| TMIGD1    | 17 | 25680602 | 25680602 | Missense | SNP | G | C | CSB1    | NM_206832.1    | p.L52V   |
| CPD       | 17 | 25793538 | 25793538 | Missense | SNP | G | C | CSB1    | NM_001304.3    | p.E773Q  |
| ATAD5     | 17 | 26244603 | 26244603 | Missense | SNP | G | A | BRC11   | NM_024857.3    | p.D1536N |
| LOC646021 | 17 | 26359426 | 26359426 | Del      | DEL | C |   | 0 BRC22 | XM_933339.1    | p.I63fs  |
| NF1       | 17 | 26586796 | 26586796 | Silent   | SNP | G | A | CSB31   | NM_001042492.2 | p.R1250  |
| NF1       | 17 | 26587155 | 26587155 | Missense | SNP | G | C | CSB1    | NM_001042492.2 | p.D1322H |
| RHBDL3    | 17 | 27672351 | 27672351 | Missense | SNP | C | A | CSB14   | NM_138328.2    | p.P402H  |
| TMEM98    | 17 | 28290641 | 28290641 | Silent   | SNP | G | A | BRC32   | NM_001033504.1 | p.P149   |
| SPACA3    | 17 | 28343075 | 28343075 | Silent   | SNP | C | G | BRC51   | NM_173847.3    | p.V2     |
| SLFN5     | 17 | 30610003 | 30610003 | Missense | SNP | G | C | CSB1    | NM_144975.3    | p.E61Q   |
| SLFN5     | 17 | 30610110 | 30610110 | Missense | SNP | G | C | CSB1    | NM_144975.3    | p.L96F   |
| MYO19     | 17 | 31931148 | 31931148 | Silent   | SNP | G | A | CSB1    | NM_025109.1    | p.L507   |
| GGNBP2    | 17 | 32016481 | 32016481 | Missense | SNP | G | A | CSB1    | NM_024835.2    | p.E489K  |
| ACACA     | 17 | 32552457 | 32552457 | Silent   | SNP | G | A | BRC41   | NM_198834.1    | p.D2069  |
| DDX52     | 17 | 33066327 | 33066327 | Missense | SNP | G | C | CSB1    | NM_007010.2    | p.Q178E  |
| PIP4K2B   | 17 | 34187468 | 34187468 | Missense | SNP | C | G | CSB1    | NM_003559.4    | p.E269Q  |
| CACNB1    | 17 | 34596323 | 34596323 | Silent   | SNP | G | A | CSB1    | NM_000723.3    | p.L194   |
| FBXL20    | 17 | 34708818 | 34708818 | Nonsense | SNP | G | A | BRC47   | NM_032875.1    | p.R94*   |
| CRKRS     | 17 | 34880670 | 34880670 | Missense | SNP | G | T | BRC29   | NM_016507.1    | p.M353I  |
| CRKRS     | 17 | 34940604 | 34940604 | Missense | SNP | T | A | BRC17   | NM_016507.1    | p.Y1328N |
| STARD3    | 17 | 35070246 | 35070246 | Missense | SNP | G | A | BRC4    | NM_006804.2    | p.E299K  |
| ERBB2     | 17 | 35134526 | 35134526 | Missense | SNP | G | C | BRC14   | NM_004448.1    | p.V777L  |
| ZBP2      | 17 | 35278185 | 35278185 | Missense | SNP | G | A | CSB7    | NM_199321.2    | p.V18I   |
| GSDMB     | 17 | 35315961 | 35315961 | Nonsense | SNP | T | A | CSB31   | NM_001042471.1 | p.R260*  |
| GSDMB     | 17 | 35322248 | 35322248 | Silent   | SNP | A | G | BRC41   | NM_001042471.1 | p.D88    |
| GSDMB     | 17 | 35326965 | 35326965 | Missense | SNP | C | G | CSB1    | NM_001042471.1 | p.R44T   |
| CCR7      | 17 | 35964547 | 35964547 | Silent   | SNP | G | A | CSB14   | NM_001838.2    | p.A370   |
| KRT33A    | 17 | 36760508 | 36760508 | Missense | SNP | C | T | CSB2    | NM_004138.2    | p.R13H   |
| KRT31     | 17 | 36806216 | 36806216 | Silent   | SNP | G | A | CSB30   | NM_002277.2    | p.L190   |

|                 |    |          |          |                  |     |    |    |       |                 |         |
|-----------------|----|----------|----------|------------------|-----|----|----|-------|-----------------|---------|
| KRT9            | 17 | 36977955 | 36977955 | Missense         | SNP | C  | A  | BRC39 | NM_000226.3     | p.G460V |
| KRT9            | 17 | 36978335 | 36978335 | Missense         | SNP | C  | T  | CSB1  | NM_000226.3     | p.R374Q |
| KRT9            | 17 | 36981682 | 36981682 | Missense         | SNP | G  | C  | BRC16 | NM_000226.3     | p.S30C  |
| NT5C3L          | 17 | 37237324 | 37237324 | Missense         | SNP | G  | T  | BRC7  | NM_052935.3     | p.F208L |
| ACLY            | 17 | 37318793 | 37318793 | Silent           | SNP | G  | A  | CSB1  | NM_001096.2     | p.F197  |
| DNAJC7          | 17 | 37393442 | 37393442 | Missense         | SNP | C  | T  | CSB1  | NM_003315.1     | p.D301N |
| DHX58           | 17 | 37514878 | 37514878 | Missense         | SNP | G  | A  | BRC44 | NM_024119.2     | p.P205L |
| GHDC            | 17 | 37597843 | 37597843 | Silent           | SNP | G  | A  | BRC18 | NM_032484.1     | p.L277  |
| STAT3           | 17 | 37739249 | 37739249 | Missense         | SNP | G  | C  | BRC39 | NM_139276.3     | p.I339M |
| CNTNAP1         | 17 | 38097452 | 38097452 | Missense         | SNP | C  | G  | BRC20 | NM_003632.2     | p.S816C |
| BRCA1           | 17 | 38499341 | 38499341 | Missense         | SNP | G  | A  | BRC39 | NM_007294.2     | p.S578F |
| MPP2            | 17 | 39315904 | 39315904 | Missense         | SNP | C  | T  | CSB22 | NM_005374.3     | p.E116K |
| C17orf53        | 17 | 39581354 | 39581354 | Missense         | SNP | A  | C  | CSB21 | NM_024032.2     | p.K219N |
| FAM171A2        | 17 | 39792520 | 39792520 | Missense         | SNP | G  | A  | CSB15 | ENST00000398346 | p.T131M |
| uc002igz.2      | 17 | 40099649 | 40099649 | Missense         | SNP | G  | C  | BRC39 | ENST00000409122 | p.E282Q |
| DBF4B           | 17 | 40142233 | 40142233 | Nonsense         | SNP | G  | T  | CSB1  | NM_145663.2     | p.E19*  |
| DCAKD           | 17 | 40457430 | 40457430 | Missense         | SNP | C  | T  | BRC44 | NM_024819.1     | p.R198H |
| NMT1            | 17 | 40526636 | 40526636 | Missense         | SNP | A  | T  | BRC31 | NM_021079.3     | p.E148V |
| PLEKHM1         | 17 | 40901503 | 40901503 | Missense         | SNP | T  | C  | CSB15 | NM_014798.1     | p.Q388R |
| ENSG00000221016 | 17 | 42550894 | 42550894 | RNA              | SNP | T  | C  | BRC42 | ENST00000408089 | NULL    |
| LOC653479       | 17 | 42923506 | 42923506 | RNA              | SNP | G  | A  | CSB31 | XR_017538.2     | NULL    |
| KPNB1           | 17 | 43091003 | 43091003 | Missense         | SNP | C  | A  | BRC32 | NM_002265.4     | p.T205N |
| KPNB1           | 17 | 43103074 | 43103074 | Missense         | SNP | C  | G  | BRC39 | NM_002265.4     | p.S475C |
| TBX21           | 17 | 43177166 | 43177166 | Missense         | SNP | A  | C  | BRC51 | NM_013351.1     | p.Q348P |
| SCRN2           | 17 | 43272649 | 43272649 | Missense         | SNP | G  | A  | BRC49 | NM_138355.1     | p.A88V  |
| SP2             | 17 | 43349076 | 43349076 | Missense         | SNP | C  | G  | CSB1  | NM_003110.5     | p.L214V |
| ATAD4           | 17 | 43385295 | 43385295 | Missense         | SNP | G  | A  | BRC44 | NM_024320.2     | p.S102L |
| SNX11           | 17 | 43545718 | 43545718 | Silent           | SNP | G  | A  | BRC30 | NM_013323.2     | p.E62   |
| LOC100129841    | 17 | 43576510 | 43576510 | Missense         | SNP | C  | T  | BRC31 | XM_001726539.1  | p.G31R  |
| HOXB3           | 17 | 43982824 | 43982824 | Silent           | SNP | C  | T  | BRC8  | NM_002146.4     | p.A389  |
| SLC35B1         | 17 | 45133819 | 45133819 | Nonstop Mutation | SNP | C  | A  | BRC20 | NM_005827.1     | p.*323Y |
| SAMD14          | 17 | 45546660 | 45546660 | Missense         | SNP | G  | C  | CSB1  | NM_174920.2     | p.L306V |
| WFIKKN2         | 17 | 46268398 | 46268398 | Missense         | SNP | C  | T  | BRC7  | NM_175575.5     | p.A34V  |
| COX11           | 17 | 50400933 | 50400934 | Missense         | DNP | GG | AA | BRC51 | NM_004375.2     | p.P25L  |

|                 |    |          |          |          |     |   |   |       |                 |          |
|-----------------|----|----------|----------|----------|-----|---|---|-------|-----------------|----------|
| NOG             | 17 | 52026993 | 52026993 | Missense | SNP | T | A | BRC44 | NM_005450.4     | p.L137Q  |
| BZRAP1          | 17 | 53740939 | 53740939 | Missense | SNP | G | A | BRC49 | NM_004758.2     | p.R1565C |
| HSF5            | 17 | 53912272 | 53912272 | Silent   | SNP | C | T | BRC37 | NM_001080439.1  | p.S302   |
| TEX14           | 17 | 54005579 | 54005579 | Missense | SNP | T | G | CSB24 | NM_198393.3     | p.N1198T |
| ENSG00000212195 | 17 | 54064142 | 54064142 | RNA      | SNP | C | T | BRC50 | ENST00000390893 | NULL     |
| TEX14           | 17 | 54084306 | 54084306 | Missense | SNP | C | G | BRC50 | NM_198393.3     | p.R19T   |
| RAD51C          | 17 | 54125064 | 54125064 | Missense | SNP | C | G | CSB1  | NM_058216.2     | p.P21A   |
| PRR11           | 17 | 54617227 | 54617227 | Silent   | SNP | A | G | BRC22 | NM_018304.2     | p.Q53    |
| RPS6KB1         | 17 | 55372983 | 55372983 | Missense | SNP | C | T | BRC44 | NM_003161.2     | p.S375F  |
| CA4             | 17 | 55589603 | 55589603 | Missense | SNP | C | T | CSB15 | NM_000717.3     | p.S101F  |
| USP32           | 17 | 55703559 | 55703559 | Nonsense | SNP | C | A | BRC23 | NM_032582.3     | p.G213*  |
| BCAS3           | 17 | 56448032 | 56448032 | Missense | SNP | C | T | BRC50 | NM_001099432.1  | p.T542I  |
| TLK2            | 17 | 58037247 | 58037247 | Silent   | SNP | G | A | CSB29 | NM_006852.1     | p.V628   |
| MARCH10         | 17 | 58167483 | 58167483 | Nonsense | SNP | G | T | BRC50 | NM_001100875.1  | p.S493*  |
| MARCH10         | 17 | 58168259 | 58168259 | Silent   | SNP | G | T | CSB17 | NM_001100875.1  | p.A234   |
| TANC2           | 17 | 58786426 | 58786426 | Missense | SNP | G | A | BRC39 | NM_025185.3     | p.R768Q  |
| GH1             | 17 | 59348871 | 59348871 | Missense | SNP | C | G | BRC51 | NM_000515.3     | p.G146A  |
| ERN1            | 17 | 59488930 | 59488930 | Silent   | SNP | C | T | BRC13 | NM_001433.3     | p.L454   |
| PLEKHM1P        | 17 | 60227336 | 60227336 | Missense | SNP | G | A | BRC11 | ENST00000290422 | p.R56C   |
| LRRC37A3        | 17 | 60295070 | 60295070 | Missense | SNP | G | C | BRC39 | NM_199340.2     | p.L1009V |
| GNA13           | 17 | 60483024 | 60483024 | Missense | SNP | C | G | CSB15 | NM_006572.4     | p.K50N   |
| BPTF            | 17 | 63319972 | 63319972 | Missense | SNP | G | C | BRC22 | NM_182641.6     | p.E694Q  |
| ARSG            | 17 | 63876290 | 63876290 | Silent   | SNP | C | T | BRC22 | NM_014960.3     | p.S237   |
| ABCA6           | 17 | 64620995 | 64620995 | Silent   | SNP | G | A | BRC34 | NM_080284.2     | p.F668   |
| SOX9            | 17 | 67631461 | 67631461 | Missense | SNP | G | A | BRC39 | NM_000346.3     | p.D290N  |
| SDK2            | 17 | 68943204 | 68943204 | Missense | SNP | G | T | CSB9  | ENST00000334543 | p.S71Y   |
| GPR142          | 17 | 69880219 | 69880219 | Missense | SNP | T | A | BRC41 | NM_181790.1     | p.V425D  |
| CD300LD         | 17 | 70087795 | 70087795 | Silent   | SNP | G | A | BRC44 | ENST00000375352 | p.L176   |
| C17orf28        | 17 | 70469965 | 70469965 | Silent   | SNP | G | A | BRC11 | NM_030630.2     | p.F190   |
| SLC16A5         | 17 | 70601479 | 70601479 | Missense | SNP | G | C | CSB1  | NM_004695.2     | p.E51D   |
| HN1             | 17 | 70656315 | 70656315 | Missense | SNP | C | G | BRC39 | NM_001002032.1  | p.D35H   |
| NUP85           | 17 | 70719746 | 70719746 | Missense | SNP | G | A | BRC6  | NM_024844.3     | p.V119I  |
| GGA3            | 17 | 70750780 | 70750780 | Missense | SNP | G | A | CSB1  | NM_138619.2     | p.R163C  |
| FBF1            | 17 | 71425456 | 71425456 | Silent   | SNP | G | T | CSB14 | NM_001080542.1  | p.I804   |



|              |    |          |          |                    |     |     |     |        |                 |                      |
|--------------|----|----------|----------|--------------------|-----|-----|-----|--------|-----------------|----------------------|
| CDK3         | 17 | 71510206 | 71510206 | Missense           | SNP | G   | A   | CSB19  | NM_001258.2     | p.R169H              |
| EVPL         | 17 | 71516869 | 71516869 | Missense           | SNP | G   | A   | CSB30  | NM_001988.2     | p.R1338W             |
| EXOC7        | 17 | 71598071 | 71598071 | Missense           | SNP | G   | A   | CSB1   | ENST00000335146 | p.H330Y              |
| MGAT5B       | 17 | 72412053 | 72412053 | Missense           | SNP | A   | G   | CSB31  | NM_198955.2     | p.N226S              |
| MGAT5B       | 17 | 72456422 | 72456422 | Silent             | SNP | C   | T   | CSB1   | NM_198955.2     | p.F771               |
| C17orf99     | 17 | 73671799 | 73671799 | Silent             | SNP | C   | T   | BRC11  | ENST00000340363 | p.F133               |
| DNAH17       | 17 | 73936853 | 73936853 | Missense           | SNP | C   | T   | CSB1   | ENST00000300671 | p.E4112K             |
| DNAH17       | 17 | 74078687 | 74078687 | Missense           | SNP | C   | T   | BRC23  | ENST00000300671 | p.V286M              |
| CBX4         | 17 | 75423496 | 75423496 | Silent             | SNP | C   | T   | CSB26  | NM_003655.2     | p.A180               |
| CCDC40       | 17 | 75637124 | 75637124 | Missense           | SNP | G   | A   | BRC21  | NM_017950.2     | p.G275E              |
| CCDC40       | 17 | 75647321 | 75647321 | Nonsense           | SNP | C   | T   | CSB21  | NM_017950.2     | p.Q463*              |
| CCDC40       | 17 | 75674451 | 75674451 | Missense           | SNP | G   | A   | CSB1   | NM_017950.2     | p.D764N              |
| RNF213       | 17 | 75958032 | 75958032 | Silent             | SNP | C   | T   | CSB22  | NM_020914.3     | p.F2170              |
| AATK         | 17 | 76722778 | 76722778 | Silent             | SNP | G   | A   | BRC13  | ENST00000326724 | p.G58                |
| BAHCC1       | 17 | 77044540 | 77044540 | Silent             | SNP | C   | T   | CSB1   | NM_001080519.2  | p.V2643              |
| FSCN2        | 17 | 77110900 | 77110900 | Nonsense           | SNP | G   | T   | BRC51  | ENST00000334850 | p.E250*              |
| GPS1         | 17 | 77605050 | 77605050 | Silent             | SNP | G   | A   | BRC35  | NM_212492.4     | p.A88                |
| FASN         | 17 | 77631650 | 77631650 | Missense           | SNP | G   | A   | BRC41  | NM_004104.4     | p.A2311V             |
| FASN         | 17 | 77635873 | 77635873 | Missense           | SNP | C   | G   | CSB1   | NM_004104.4     | p.E1525Q             |
| FASN         | 17 | 77636946 | 77636946 | Missense           | SNP | G   | A   | CSB1   | NM_004104.4     | p.R1275C             |
| FASN         | 17 | 77646574 | 77646576 | In Frame Del       | DEL | AAG |     | 0 BRC5 | NM_004104.4     | p.F65in<br>Frame del |
| HEXDC        | 17 | 77993726 | 77993726 | Missense           | SNP | A   | T   | CSB28  | NM_173620.2     | p.E576V              |
| RAB40B       | 17 | 78210791 | 78210791 | Missense           | SNP | C   | T   | CSB22  | NM_006822.2     | p.R99H               |
| LOC100130247 | 18 | 1166892  | 1166892  | Missense           | SNP | A   | C   | BRC13  | XM_001716684.1  | p.V41G               |
| NDC80        | 18 | 2598807  | 2598807  | Missense           | SNP | G   | A   | BRC39  | NM_006101.2     | p.E556K              |
| SMCHD1       | 18 | 2728476  | 2728476  | Missense           | SNP | G   | C   | CSB1   | NM_015295.2     | p.D1120H             |
| SMCHD1       | 18 | 2774593  | 2774593  | Frame Shift<br>Ins | INS |     | 0 G | BRC41  | NM_015295.2     | p.C1899fs            |
| LPIN2        | 18 | 2930711  | 2930711  | Splice_Site        | SNP | C   | G   | CSB1   | NM_014646.2     | e4-1                 |
| LAMA1        | 18 | 7013307  | 7013307  | Missense           | SNP | C   | T   | BRC3   | NM_005559.2     | p.G853S              |
| RNMT         | 18 | 13742361 | 13742361 | Missense           | SNP | G   | A   | BRC44  | NM_003799.1     | p.E432K              |
| MC5R         | 18 | 13816295 | 13816295 | Missense           | SNP | C   | A   | BRC50  | NM_005913.1     | p.F177L              |
| MC5R         | 18 | 13816372 | 13816372 | Missense           | SNP | C   | T   | BRC18  | NM_005913.1     | p.S203F              |
| ROCK1        | 18 | 16804456 | 16804456 | Nonsense           | SNP | G   | A   | BRC50  | NM_005406.2     | p.Q891*              |
| MIB1         | 18 | 17602599 | 17602599 | Missense           | SNP | G   | A   | CSB13  | NM_020774.2     | p.R140H              |



|           |    |          |          |          |     |   |   |       |                 |          |
|-----------|----|----------|----------|----------|-----|---|---|-------|-----------------|----------|
| MIB1      | 18 | 17649647 | 17649647 | Nonsense | SNP | C | T | BRC39 | NM_020774.2     | p.R518*  |
| LAMA3     | 18 | 19680361 | 19680361 | Silent   | SNP | C | T | BRC31 | NM_198129.3     | p.T1274  |
| LAMA3     | 18 | 19777916 | 19777916 | Missense | SNP | G | A | BRC7  | NM_198129.3     | p.D3065N |
| OSBPL1A   | 18 | 20001294 | 20001294 | Silent   | SNP | G | A | CSB21 | NM_080597.3     | p.A844   |
| ZNF521    | 18 | 21059459 | 21059459 | Missense | SNP | C | G | BRC31 | NM_015461.2     | p.K807N  |
| CHST9     | 18 | 22751025 | 22751025 | Silent   | SNP | C | T | CSB33 | NM_031422.3     | p.E176   |
| DSC2      | 18 | 26920572 | 26920572 | Missense | SNP | C | T | CSB15 | NM_024422.3     | p.V303M  |
| RNF125    | 18 | 27852975 | 27852975 | Missense | SNP | C | T | CSB1  | NM_017831.3     | p.R51C   |
| DTNA      | 18 | 30652285 | 30652285 | Missense | SNP | C | A | BRC13 | NM_001390.1     | p.T290K  |
| GALNT1    | 18 | 31497738 | 31497738 | Silent   | SNP | A | G | CSB22 | NM_020474.3     | p.R96    |
| RPRD1A    | 18 | 31867717 | 31867717 | Missense | SNP | G | C | CSB12 | NM_018170.3     | p.T78R   |
| SLC14A2   | 18 | 41503401 | 41503401 | Silent   | SNP | G | C | BRC47 | NM_007163.3     | p.T723   |
| KIAA1632  | 18 | 41694106 | 41694106 | Missense | SNP | C | T | BRC48 | NM_020964.2     | p.E2324K |
| LOXHD1    | 18 | 42393468 | 42393468 | Missense | SNP | C | G | BRC39 | ENST00000398722 | p.D775H  |
| LOC647055 | 18 | 44185251 | 44185251 | Silent   | SNP | G | T | BRC13 | XM_001715324.1  | p.L42    |
| SMAD4     | 18 | 46845889 | 46845889 | Missense | SNP | G | A | CSB29 | NM_005359.5     | p.G352R  |
| SMAD4     | 18 | 46847404 | 46847404 | Missense | SNP | G | T | CSB29 | NM_005359.5     | p.G386V  |
| TCF4      | 18 | 51403581 | 51403581 | Missense | SNP | T | C | CSB22 | NM_001083962.1  | p.M25V   |
| FLJ45743  | 18 | 51886636 | 51886636 | RNA      | SNP | C | T | BRC22 | XR_041396.1     | NULL     |
| ALPK2     | 18 | 54353132 | 54353132 | Missense | SNP | T | C | CSB15 | NM_052947.3     | p.K1756R |
| ALPK2     | 18 | 54355880 | 54355880 | Missense | SNP | G | A | BRC35 | NM_052947.3     | p.T840M  |
| ALPK2     | 18 | 54425599 | 54425599 | Silent   | SNP | C | G | CSB1  | NM_052947.3     | p.G54    |
| MC4R      | 18 | 56189883 | 56189883 | Missense | SNP | G | A | BRC5  | NM_005912.2     | p.A227V  |
| CDH20     | 18 | 57317425 | 57317425 | Silent   | SNP | C | T | BRC28 | NM_031891.2     | p.D91    |
| SERPINB4  | 18 | 59457402 | 59457402 | Silent   | SNP | C | T | CSB10 | NM_002974.2     | p.Q255   |
| SERPINB10 | 18 | 59736198 | 59736198 | Missense | SNP | C | T | BRC29 | NM_005024.1     | p.S85L   |
| DSEL      | 18 | 63332588 | 63332588 | Missense | SNP | G | A | CSB28 | NM_032160.2     | p.R90C   |
| ADNP2     | 18 | 75995063 | 75995063 | Missense | SNP | G | T | BRC29 | NM_014913.3     | p.G259V  |
| MED16     | 19 | 826318   | 826318   | Missense | SNP | G | T | CSB19 | NM_005481.2     | p.P566H  |
| TCF3      | 19 | 1574994  | 1574994  | Missense | SNP | G | C | CSB1  | NM_003200.1     | p.Q169E  |
| AP3D1     | 19 | 2065241  | 2065241  | Silent   | SNP | T | C | CSB26 | NM_003938.1     | p.K828   |
| DOT1L     | 19 | 2153725  | 2153725  | Missense | SNP | T | G | BRC15 | NM_032482.2     | p.F245C  |
| PIAS4     | 19 | 3988823  | 3988823  | Missense | SNP | C | T | BRC21 | NM_015897.2     | p.R495W  |
| TMIGD2    | 19 | 4243734  | 4243734  | Silent   | SNP | C | T | BRC47 | NM_144615.1     | p.A237   |
| ARRDC5    | 19 | 4842504  | 4842504  | Missense | SNP | C | T | BRC5  | NM_001080523.1  | p.E195K  |

|             |    |          |          |                             |     |                         |   |       |                |                           |          |
|-------------|----|----------|----------|-----------------------------|-----|-------------------------|---|-------|----------------|---------------------------|----------|
| PTPRS       | 19 | 5225326  | 5225326  | Missense                    | SNP | C                       | G | BRC44 | NM_002850.3    | p.D41H                    |          |
| SAFB        | 19 | 5574391  | 5574391  | Missense                    | SNP | G                       | A | CSB10 | NM_002967.2    | p.E59K                    |          |
| FUT3        | 19 | 5795323  | 5795323  | Silent                      | SNP | G                       | A | CSB15 | NM_000149.3    | p.S176                    |          |
| CAPS        | 19 | 5865629  | 5865629  | Missense                    | SNP | C                       | G | BRC10 | NM_004058.3    | p.R47G                    |          |
| KHSRP       | 19 | 6367776  | 6367776  | Missense                    | SNP | G                       | C | BRC18 | NM_003685.2    | p.H434D                   |          |
| C3          | 19 | 6629299  | 6629299  | Splice_Site                 | SNP | C                       | T | BRC22 | NM_000064.2    | e40-1                     |          |
| FBN3        | 19 | 8080519  | 8080519  | Silent                      | SNP | G                       | A | BRC24 | NM_032447.3    | p.C1484                   |          |
| MYO1F       | 19 | 8519130  | 8519130  | Silent                      | SNP | C                       | T | CSB1  | NM_012335.2    | p.E391                    |          |
| MYO1F       | 19 | 8522678  | 8522678  | Silent                      | SNP | C                       | T | CSB2  | NM_012335.2    | p.S239                    |          |
| MYO1F       | 19 | 8523020  | 8523020  | Missense                    | SNP | C                       | T | BRC47 | NM_012335.2    | p.R178Q                   |          |
| ZNF558      | 19 | 8784238  | 8784238  | Missense                    | SNP | G                       | A | BRC44 | NM_144693.1    | p.T142M                   |          |
| MUC16       | 19 | 8888224  | 8888224  | Missense                    | SNP | C                       | T | CSB9  | NM_024690.2    | p.S12221N                 |          |
| MUC16       | 19 | 8899382  | 8899382  | Missense                    | SNP | C                       | A | BRC16 | NM_024690.2    | p.S12046I                 |          |
| MUC16       | 19 | 8899397  | 8899397  | Nonsense                    | SNP | C                       | T | CSB2  | NM_024690.2    | p.W12041*                 |          |
| MUC16       | 19 | 8917846  | 8917846  | Missense                    | SNP | C                       | G | CSB8  | NM_024690.2    | p.K10200N                 |          |
| MUC16       | 19 | 8919138  | 8919138  | Missense                    | SNP | C                       | G | CSB1  | NM_024690.2    | p.E9770Q                  |          |
| MUC16       | 19 | 8924524  | 8924524  | Silent                      | SNP | C                       | G | CSB1  | NM_024690.2    | p.L7974                   |          |
| MUC16       | 19 | 8949880  | 8949880  | Missense                    | SNP | G                       | T | CSB23 | NM_024690.2    | p.P979T                   |          |
| OR7G3       | 19 | 9098336  | 9098336  | Silent                      | SNP | G                       | A | BRC9  | NM_001001958.1 | p.C97                     |          |
| OR7D4       | 19 | 9185707  | 9185707  | Silent                      | SNP | C                       | T | BRC39 | NM_001005191.1 | p.Q269                    |          |
| OR7E24      | 19 | 9223271  | 9223271  | Silent                      | SNP | C                       | T | CSB1  | NM_001079935.1 | p.L184                    |          |
| ZNF699      | 19 | 9268112  | 9268112  | Missense                    | SNP | G                       | C | CSB1  | NM_198535.1    | p.S323C                   |          |
| ZNF699      | 19 | 9268983  | 9268983  | Missense                    | SNP | C                       | G | CSB1  | NM_198535.1    | p.E153D                   |          |
| LOC646048   | 19 | 9489952  | 9489952  | RNA                         | SNP | G                       | A | BRC22 | XR_017059.1    | NULL                      |          |
| OLFM2       | 19 | 9829471  | 9829471  | Missense                    | SNP | G                       | A | BRC22 | NM_058164.2    | p.R94C                    |          |
| COL5A3      | 19 | 9949097  | 9949097  | Missense                    | SNP | G                       | T | CSB22 | NM_015719.3    | p.L1060M                  |          |
| PPAN-P2RY11 | 19 | 10081697 | 10081697 | Splice_Site                 | SNP | G                       | A | BRC20 | NM_001040664.1 | e7+1                      |          |
| EIF3G       | 19 | 10087476 | 10087476 | Missense                    | SNP | G                       | A | CSB1  | NM_003755.3    | p.R242C                   |          |
| SLC44A2     | 19 | 10606727 | 10606741 | In Frame Del<br>Frame Shift | DEL | GCACTC<br>AT<br>CAAAGAA | 0 | BRC41 | NM_020428.1    | p.LIKEA346in<br>Frame del |          |
| ILF3        | 19 | 10652083 | 10652083 | Ins                         | INS |                         | 0 | A     | CSB16          | NM_012218.1               | p.R307fs |
| SMARCA4     | 19 | 10991353 | 10991353 | Missense                    | SNP | C                       | G | CSB1  | NM_003072.1    | p.I864M                   |          |
| KANK2       | 19 | 11148359 | 11148359 | Missense                    | SNP | G                       | C | CSB24 | NM_015493.1    | p.T552R                   |          |
| TSPAN16     | 19 | 11269877 | 11269877 | Silent                      | SNP | G                       | C | BRC18 | NM_012466.2    | p.L43                     |          |

|           |    |          |          |                    |     |   |   |         |                |          |
|-----------|----|----------|----------|--------------------|-----|---|---|---------|----------------|----------|
| PRKCSH    | 19 | 11418086 | 11418086 | Splice_Site        | SNP | G | A | CSB20   | NM_002743.1    | e8-1     |
| LOC730651 | 19 | 12180688 | 12180688 | Missense           | SNP | G | A | CSB25   | XM_001719635.1 | p.R396Q  |
| ZNF442    | 19 | 12321899 | 12321899 | Silent             | SNP | G | A | BRC39   | NM_030824.2    | p.F500   |
| ZNF490    | 19 | 12552865 | 12552865 | Missense           | SNP | C | T | BRC20   | NM_020714.2    | p.A342T  |
| DHPS      | 19 | 12647914 | 12647914 | Missense           | SNP | C | G | BRC31   | NM_001930.2    | p.E311Q  |
| HOOK2     | 19 | 12743118 | 12743118 | Missense           | SNP | C | T | CSB30   | NM_013312.1    | p.E206K  |
| RNASEH2A  | 19 | 12785164 | 12785164 | Missense           | SNP | C | A | BRC35   | NM_006397.2    | p.Q262K  |
| SAMD1     | 19 | 14061038 | 14061038 | Missense           | SNP | A | T | CSB19   | NM_138352.1    | p.L258H  |
| CD97      | 19 | 14374542 | 14374542 | Silent             | SNP | C | G | BRC39   | NM_078481.1    | p.L439   |
| AKAP8L    | 19 | 15352327 | 15352327 | Splice_Site        | SNP | C | A | CSB14   | NM_014371.2    | e13+1    |
| OR10H4    | 19 | 15921515 | 15921515 | Missense           | SNP | C | T | CSB3    | NM_001004465.1 | p.A233V  |
| EPS15L1   | 19 | 16409659 | 16409659 | Silent             | SNP | C | T | CSB1    | NM_021235.1    | p.L77    |
| NWD1      | 19 | 16769601 | 16769601 | Frame Shift<br>Del | DEL | G |   | 0 CSB30 | NM_001007525.2 | p.A987fs |
| NWD1      | 19 | 16771888 | 16771888 | Silent             | SNP | C | T | CSB1    | NM_001007525.2 | p.L1082  |
| SIN3B     | 19 | 16835532 | 16835532 | Missense           | SNP | G | T | CSB8    | NM_015260.1    | p.E468D  |
| CPAMD8    | 19 | 16864925 | 16864925 | Missense           | SNP | C | G | CSB1    | NM_015692.2    | p.L1931F |
| CPAMD8    | 19 | 16868119 | 16868119 | Nonsense           | SNP | G | T | BRC39   | NM_015692.2    | p.S1812* |
| CPAMD8    | 19 | 16878920 | 16878920 | Missense           | SNP | C | G | BRC39   | NM_015692.2    | p.R1337T |
| CPAMD8    | 19 | 16893752 | 16893752 | Missense           | SNP | T | G | BRC44   | NM_015692.2    | p.S1245R |
| UNC13A    | 19 | 17612371 | 17612371 | Silent             | SNP | G | A | CSB19   | NM_001080421.1 | p.T1000  |
| UNC13A    | 19 | 17619119 | 17619119 | Missense           | SNP | C | T | BRC42   | NM_001080421.1 | p.V755M  |
| MAP1S     | 19 | 17697839 | 17697839 | Missense           | SNP | G | A | CSB1    | NM_018174.4    | p.E216K  |
| SLC5A5    | 19 | 17860159 | 17860159 | Nonsense           | SNP | C | T | CSB22   | NM_000453.2    | p.R516*  |
| UPF1      | 19 | 18826735 | 18826735 | Missense           | SNP | C | G | CSB1    | NM_002911.3    | p.S438C  |
| DDX49     | 19 | 18891562 | 18891562 | Silent             | SNP | C | T | CSB1    | NM_019070.3    | p.F4     |
| NCAN      | 19 | 19199200 | 19199200 | Missense           | SNP | G | A | BRC11   | NM_004386.2    | p.E591K  |
| NCAN      | 19 | 19217140 | 19217140 | Missense           | SNP | G | C | CSB1    | NM_004386.2    | p.E1171Q |
| GATAD2A   | 19 | 19472990 | 19472990 | Missense           | SNP | C | A | CSB12   | NM_017660.3    | p.T279K  |
| ZNF14     | 19 | 19685928 | 19685928 | Missense           | SNP | C | G | BRC39   | NM_021030.2    | p.D55H   |
| ZNF506    | 19 | 19766575 | 19766575 | Missense           | SNP | C | T | CSB1    | NM_001099269.2 | p.C374Y  |
| ZNF93     | 19 | 19906097 | 19906097 | Missense           | SNP | A | G | CSB15   | NM_031218.2    | p.I445V  |
| ZNF826    | 19 | 20369320 | 20369320 | Missense           | SNP | C | T | BRC31   | NM_001039884.2 | p.G116E  |
| ZNF431    | 19 | 21118269 | 21118269 | Missense           | SNP | T | C | BRC50   | NM_133473.2    | p.Y27H   |
| UQCRFS1   | 19 | 34390467 | 34390467 | Missense           | SNP | G | A | CSB2    | NM_006003.2    | p.T218I  |

|          |    |          |          |          |     |    |   |       |                 |          |
|----------|----|----------|----------|----------|-----|----|---|-------|-----------------|----------|
| C19orf2  | 19 | 35197645 | 35197645 | Silent   | SNP | A  | C | CSB12 | NM_003796.2     | p.G479   |
| ZNF536   | 19 | 35730953 | 35730953 | Missense | SNP | G  | C | CSB25 | NM_014717.1     | p.V863L  |
| ZNF536   | 19 | 35731307 | 35731307 | Missense | SNP | C  | T | CSB14 | NM_014717.1     | p.R981W  |
| CHST8    | 19 | 38954797 | 38954797 | Silent   | SNP | C  | T | BRC28 | NM_022467.1     | p.N88    |
| ZNF599   | 19 | 39942169 | 39942169 | Silent   | SNP | A  | C | BRC50 | NM_001007248.2  | p.A459   |
| ATP4A    | 19 | 40741864 | 40741864 | Missense | SNP | C  | T | CSB1  | NM_000704.2     | p.E376K  |
| SNX26    | 19 | 40962594 | 40962594 | Missense | SNP | G  | A | BRC42 | ENST00000221905 | p.C201Y  |
| SNX26    | 19 | 40970611 | 40970611 | Missense | SNP | C  | T | CSB10 | NM_052948.2     | p.R941C  |
| POLR2I   | 19 | 41296759 | 41296759 | Missense | SNP | C  | G | BRC31 | NM_006233.4     | p.E105Q  |
| CAPNS1   | 19 | 41325432 | 41325432 | Missense | SNP | G  | C | CSB1  | NM_001003962.1  | p.E94D   |
| ZNF146   | 19 | 41419421 | 41419421 | Nonsense | SNP | C  | G | BRC31 | NM_001099638.1  | p.S80*   |
| ZNF260   | 19 | 41697815 | 41697815 | Missense | SNP | C  | T | BRC31 | NM_001012756.1  | p.E56K   |
| ZNF260   | 19 | 41697843 | 41697843 | Missense | SNP | C  | G | BRC31 | NM_001012756.1  | p.K46N   |
| ZNF569   | 19 | 42597025 | 42597025 | Silent   | SNP | C  | A | CSB13 | NM_152484.2     | p.L125   |
| ZNF573   | 19 | 42922717 | 42922717 | Missense | SNP | G  | A | BRC39 | NM_152360.2     | p.R114C  |
| SIPA1L3  | 19 | 43264517 | 43264518 | Del      | DEL | TC | 0 | CSB15 | NM_015073.1     | p.S158fs |
| C19orf15 | 19 | 43534843 | 43534843 | Missense | SNP | C  | T | BRC13 | ENST00000378713 | p.R310W  |
| C19orf15 | 19 | 43540915 | 43540915 | Missense | SNP | G  | C | CSB1  | NM_021185.4     | p.R97P   |
| RYR1     | 19 | 43650111 | 43650111 | Missense | SNP | G  | A | CSB34 | NM_000540.2     | p.R1067H |
| RYR1     | 19 | 43701701 | 43701701 | Silent   | SNP | A  | T | CSB15 | NM_000540.2     | p.A3342  |
| LRFN1    | 19 | 44497265 | 44497265 | Silent   | SNP | C  | T | BRC13 | NM_020862.1     | p.Q184   |
| PLEKHG2  | 19 | 44605533 | 44605533 | Missense | SNP | G  | A | BRC31 | NM_022835.2     | p.E625K  |
| PLEKHG2  | 19 | 44605746 | 44605746 | Missense | SNP | G  | C | CSB1  | NM_022835.2     | p.G696R  |
| ZNF780B  | 19 | 45233102 | 45233102 | Missense | SNP | C  | G | BRC11 | NM_001005851.1  | p.E502Q  |
| ZNF780B  | 19 | 45233657 | 45233657 | Missense | SNP | G  | A | BRC11 | NM_001005851.1  | p.H317Y  |
| ZNF780A  | 19 | 45273070 | 45273070 | Silent   | SNP | G  | A | BRC39 | NM_001010880.2  | p.L339   |
| AKT2     | 19 | 45462979 | 45462979 | Missense | SNP | G  | A | BRC21 | ENST00000358335 | p.S11F   |
| PRX      | 19 | 45591975 | 45591975 | Missense | SNP | C  | T | CSB7  | NM_181882.2     | p.R1375Q |
| ADCK4    | 19 | 45907857 | 45907857 | Missense | SNP | C  | G | BRC7  | NM_024876.1     | p.G105A  |
| CYP2A7   | 19 | 46078225 | 46078225 | Silent   | SNP | G  | A | BRC51 | NM_000764.2     | p.H164   |
| AXL      | 19 | 46440689 | 46440689 | Silent   | SNP | C  | T | CSB1  | NM_021913.4     | p.V458   |
| PSG4     | 19 | 48400053 | 48400053 | Silent   | SNP | G  | A | CSB22 | NM_002780.3     | p.D85    |
| ZNF223   | 19 | 49263211 | 49263211 | Missense | SNP | C  | T | CSB2  | NM_013361.4     | p.R464C  |
| CBLC     | 19 | 49977499 | 49977499 | Silent   | SNP | C  | T | BRC50 | NM_012116.1     | p.L230   |

|              |    |          |          |                         |     |        |   |       |                 |          |
|--------------|----|----------|----------|-------------------------|-----|--------|---|-------|-----------------|----------|
| BCAM         | 19 | 50014521 | 50014521 | Missense                | SNP | G      | A | BRC44 | NM_005581.1     | p.D518N  |
| LOC284352    | 19 | 50333632 | 50333632 | Missense                | SNP | G      | A | BRC31 | XM_001723010.1  | p.E75K   |
| LOC100132177 | 19 | 50433739 | 50433739 | Silent                  | SNP | C      | T | BRC6  | XM_001717776.1  | p.G135   |
| ERCC2        | 19 | 50554005 | 50554005 | Missense<br>Frame Shift | SNP | C      | T | CSB6  | ENST00000391940 | p.A391T  |
| ERCC2        | 19 | 50564241 | 50564246 | Del                     | DEL | TGACCC | 0 | CSB22 | NM_000400.3     | p.G36fs  |
| CCDC61       | 19 | 51198176 | 51198176 | Silent                  | SNP | G      | A | CSB16 | NM_001080402.1  | p.V77    |
| SAE1         | 19 | 52398792 | 52398792 | Silent                  | SNP | A      | G | CSB34 | NM_005500.1     | p.P301   |
| ZNF541       | 19 | 52739658 | 52739658 | Missense                | SNP | G      | A | CSB2  | ENST00000391901 | p.A647V  |
| CCDC114      | 19 | 53515389 | 53515389 | Missense                | SNP | C      | G | BRC31 | ENST00000377438 | p.E17Q   |
| PLEKHA4      | 19 | 54048874 | 54048874 | Silent                  | SNP | C      | T | BRC20 | NM_020904.1     | p.L401   |
| RUVBL2       | 19 | 54206322 | 54206322 | Missense                | SNP | C      | A | CSB10 | NM_006666.1     | p.A315D  |
| CGB7         | 19 | 54249431 | 54249431 | Missense                | SNP | C      | A | CSB7  | NM_033142.1     | p.A143S  |
| TRPM4        | 19 | 54395853 | 54395853 | Silent                  | SNP | C      | T | CSB9  | NM_017636.2     | p.D984   |
| LOC645971    | 19 | 54622504 | 54622504 | Silent                  | SNP | C      | T | BRC16 | XM_928936.1     | p.P7     |
| PRRG2        | 19 | 54778691 | 54778691 | Missense                | SNP | G      | C | CSB1  | NM_000951.2     | p.E56Q   |
| SCAF1        | 19 | 54849850 | 54849850 | Missense                | SNP | T      | C | CSB19 | NM_021228.1     | p.S1177P |
| SIGLEC11     | 19 | 55153736 | 55153736 | Missense                | SNP | C      | T | CSB23 | NM_052884.1     | p.V435I  |
| MYH14        | 19 | 55442162 | 55442162 | Missense                | SNP | T      | G | CSB34 | NM_001077186.1  | p.Y434D  |
| POLD1        | 19 | 55598563 | 55598563 | Missense                | SNP | C      | T | BRC16 | NM_002691.2     | p.A380V  |
| SPIB         | 19 | 55623145 | 55623145 | Missense                | SNP | G      | A | CSB1  | NM_003121.3     | p.G177R  |
| MYBPC2       | 19 | 55646960 | 55646960 | Missense                | SNP | C      | T | CSB14 | NM_004533.3     | p.S546L  |
| LRRC4B       | 19 | 55714107 | 55714107 | Silent                  | SNP | C      | G | CSB25 | NM_001080457.1  | p.L225   |
| GPR32        | 19 | 55966663 | 55966663 | Missense                | SNP | A      | C | CSB10 | NM_001506.1     | p.T332P  |
| ACPT         | 19 | 55989536 | 55989536 | Missense                | SNP | C      | T | BRC38 | NM_033068.2     | p.T291I  |
| KLK1         | 19 | 56015447 | 56015447 | Missense                | SNP | G      | A | CSB1  | NM_002257.2     | p.H91Y   |
| KLK7         | 19 | 56175499 | 56175499 | Missense                | SNP | A      | G | BRC35 | NM_005046.2     | p.I93T   |
| KLK11        | 19 | 56218165 | 56218165 | Missense                | SNP | A      | G | BRC30 | NM_144947.1     | p.C231R  |
| KLK14        | 19 | 56274588 | 56274588 | Silent                  | SNP | G      | A | BRC39 | NM_022046.4     | p.V148   |
| FLJ40235     | 19 | 56459141 | 56459141 | Missense                | SNP | G      | A | BRC3  | NM_173635.1     | p.M1I    |
| SIGLEC10     | 19 | 56611956 | 56611956 | Missense                | SNP | G      | A | BRC38 | NM_033130.3     | p.T161M  |
| SIGLEC12     | 19 | 56696660 | 56696660 | Missense<br>Frame Shift | SNP | G      | T | BRC37 | NM_053003.1     | p.S47Y   |
| HAS1         | 19 | 56908493 | 56908494 | Del                     | DEL | CA     | 0 | BRC38 | NM_001523.2     | p.*579fs |
| FPR3         | 19 | 57019181 | 57019181 | Missense                | SNP | G      | A | CSB16 | NM_002030.3     | p.R123H  |
| ZNF350       | 19 | 57161001 | 57161001 | Missense                | SNP | G      | A | CSB1  | NM_021632.3     | p.H173Y  |

|         |    |          |          |          |     |   |   |       |                 |          |
|---------|----|----------|----------|----------|-----|---|---|-------|-----------------|----------|
| ZNF615  | 19 | 57189795 | 57189795 | Missense | SNP | G | C | BRC18 | NM_198480.2     | p.Q116E  |
| ZNF83   | 19 | 57809128 | 57809128 | Missense | SNP | G | A | BRC47 | NM_001105549.1  | p.R168C  |
| ZNF347  | 19 | 58337017 | 58337017 | Silent   | SNP | A | G | CSB25 | NM_032584.1     | p.Y292   |
| ZNF765  | 19 | 58603481 | 58603481 | Silent   | SNP | A | G | BRC40 | NM_001040185.1  | p.T287   |
| ZNF765  | 19 | 58603665 | 58603665 | Missense | SNP | C | T | BRC39 | NM_001040185.1  | p.H349Y  |
| LILRB5  | 19 | 59448223 | 59448223 | Silent   | SNP | G | C | BRC44 | NM_001081442.1  | p.A492   |
| LAIR1   | 19 | 59564557 | 59564557 | Missense | SNP | C | T | CSB31 | NM_002287.3     | p.V48M   |
| LENG8   | 19 | 59661106 | 59661106 | Missense | SNP | G | C | CSB1  | NM_052925.2     | p.E639Q  |
| KIR2DL1 | 19 | 59989805 | 59989805 | Missense | SNP | G | A | CSB8  | ENST00000391730 | p.R50H   |
| KIR2DL1 | 19 | 59991664 | 59991664 | Silent   | SNP | G | A | CSB1  | ENST00000391730 | p.T186   |
| FCAR    | 19 | 60088626 | 60088626 | Missense | SNP | G | A | CSB1  | NM_002000.2     | p.E80K   |
| NLRP2   | 19 | 60200643 | 60200643 | Missense | SNP | C | T | BRC18 | NM_017852.2     | p.S1009F |
| TNNI3   | 19 | 60357312 | 60357312 | Silent   | SNP | G | T | CSB1  | NM_000363.4     | p.I149   |
| NLRP4   | 19 | 61074078 | 61074078 | Missense | SNP | C | T | CSB24 | NM_134444.4     | p.R810C  |
| NLRP13  | 19 | 61101966 | 61101966 | Missense | SNP | C | T | BRC37 | NM_176810.2     | p.R980H  |
| NLRP5   | 19 | 61207176 | 61207176 | Missense | SNP | G | C | BRC42 | NM_153447.4     | p.E115D  |
| NLRP5   | 19 | 61230517 | 61230517 | Missense | SNP | C | A | BRC11 | NM_153447.4     | p.S350Y  |
| ZNF582  | 19 | 61593239 | 61593239 | Missense | SNP | C | G | BRC50 | NM_144690.1     | p.E59Q   |
| ZNF582  | 19 | 61593647 | 61593647 | Silent   | SNP | G | A | BRC4  | NM_144690.1     | p.F15    |
| ZNF583  | 19 | 61617595 | 61617595 | Missense | SNP | A | G | BRC3  | NM_152478.1     | p.K69R   |
| ZNF835  | 19 | 61868222 | 61868222 | Nonsense | SNP | C | A | BRC22 | NM_001005850.1  | p.E75*   |
| ZIM3    | 19 | 62338684 | 62338684 | Missense | SNP | G | T | BRC18 | NM_052882.1     | p.S278Y  |
| AURKC   | 19 | 62435830 | 62435830 | Silent   | SNP | C | T | CSB26 | NM_001015878.1  | p.S135   |
| ZNF304  | 19 | 62556919 | 62556919 | Silent   | SNP | C | T | CSB1  | NM_020657.2     | p.F16    |
| ZNF547  | 19 | 62581167 | 62581167 | Silent   | SNP | C | T | BRC42 | NM_173631.2     | p.S337   |
| ZNF17   | 19 | 62623915 | 62623915 | Missense | SNP | G | C | BRC31 | NM_006959.2     | p.E415Q  |
| ZNF134  | 19 | 62824317 | 62824317 | Missense | SNP | G | C | BRC39 | NM_003435.3     | p.E340Q  |
| ZNF551  | 19 | 62891224 | 62891224 | Missense | SNP | G | C | BRC3  | NM_138347.3     | p.S574T  |
| ZNF417  | 19 | 63112294 | 63112294 | Silent   | SNP | A | G | BRC16 | NM_152475.2     | p.S388   |
| ZNF8    | 19 | 63489353 | 63489353 | Missense | SNP | G | C | BRC11 | NM_021089.2     | p.E87Q   |
| ZNF497  | 19 | 63560049 | 63560049 | Silent   | SNP | G | A | BRC7  | NM_198458.1     | p.F255   |
| RPS5    | 19 | 63591383 | 63591383 | Missense | SNP | T | C | BRC16 | NM_001009.3     | p.W23R   |
| UBE2M   | 19 | 63760301 | 63760301 | Del      | DEL | T | 0 | BRC51 | NM_003969.3     | p.I49fs  |
| RSPO4   | 20 | 896675   | 896675   | Silent   | SNP | G | A | BRC8  | NM_001029871.2  | p.G62    |

|              |    |          |          |             |     |   |   |       |                 |          |
|--------------|----|----------|----------|-------------|-----|---|---|-------|-----------------|----------|
| TGM6         | 20 | 2323939  | 2323939  | Missense    | SNP | A | G | BRC3  | NM_198994.2     | p.E94G   |
| C20orf141    | 20 | 2745597  | 2745597  | Missense    | SNP | A | C | BRC34 | ENST00000380593 | p.E223A  |
| LOC100131194 | 20 | 3411548  | 3411548  | Missense    | SNP | T | G | BRC7  | XM_001724990.1  | p.M7R    |
| CDC25B       | 20 | 3731771  | 3731771  | Missense    | SNP | C | G | BRC32 | NM_021873.3     | p.T425R  |
| PANK2        | 20 | 3817922  | 3817922  | Nonsense    | SNP | C | T | CSB1  | NM_153638.4     | p.R59*   |
| SMOX         | 20 | 4111365  | 4111365  | Silent      | SNP | C | A | CSB5  | NM_175839.1     | p.V413   |
| SLC23A2      | 20 | 4798569  | 4798569  | Del         | DEL | G |   | CSB5  | NM_005116.5     | p.I412fs |
| SLC23A2      | 20 | 4802684  | 4802684  | Missense    | SNP | C | T | BRC22 | NM_005116.5     | p.D334N  |
| PROKR2       | 20 | 5231294  | 5231294  | Missense    | SNP | G | C | CSB1  | NM_144773.2     | p.L183V  |
| BMP2         | 20 | 6707412  | 6707412  | Silent      | SNP | G | C | CSB1  | NM_001200.2     | p.R289   |
| HAO1         | 20 | 7834800  | 7834800  | Splice_Site | SNP | C | A | CSB25 | NM_017545.2     | e4+1     |
| PLCB1        | 20 | 8718216  | 8718216  | Silent      | SNP | C | T | CSB15 | NM_015192.2     | p.I1110  |
| PLCB4        | 20 | 9388326  | 9388326  | Missense    | SNP | G | C | CSB17 | NM_000933.2     | p.M1027I |
| ESF1         | 20 | 13711699 | 13711699 | Nonsense    | SNP | G | A | BRC13 | NM_016649.3     | p.R30*   |
| MACROD2      | 20 | 15791412 | 15791412 | Missense    | SNP | T | A | CSB5  | NM_080676.1     | p.V223D  |
| KIF16B       | 20 | 16434487 | 16434487 | Nonsense    | SNP | G | A | BRC5  | NM_024704.3     | p.Q294*  |
| RRBP1        | 20 | 17558499 | 17558499 | Silent      | SNP | C | T | CSB15 | NM_001042576.1  | p.E473   |
| C20orf72     | 20 | 17904348 | 17904348 | Missense    | SNP | G | A | CSB19 | NM_052865.2     | p.R178Q  |
| CRNKL1       | 20 | 19966137 | 19966137 | Missense    | SNP | C | T | CSB1  | NM_016652.4     | p.E737K  |
| LOC643659    | 20 | 20004592 | 20004592 | RNA         | SNP | C | T | BRC41 | XR_041860.1     | NULL     |
| LOC200261    | 20 | 23054759 | 23054759 | RNA         | SNP | G | T | BRC41 | XR_041194.1     | NULL     |
| LOC100128232 | 20 | 24416515 | 24416515 | Missense    | SNP | C | T | BRC44 | XM_001718796.1  | p.A407V  |
| PYGB         | 20 | 25200075 | 25200075 | Missense    | SNP | C | T | CSB9  | NM_002862.3     | p.R161C  |
| PYGB         | 20 | 25219149 | 25219149 | Silent      | SNP | C | A | CSB1  | NM_002862.3     | p.I620   |
| NANP         | 20 | 25545028 | 25545028 | Missense    | SNP | C | T | BRC50 | NM_152667.2     | p.E94K   |
| REM1         | 20 | 29533804 | 29533804 | Silent      | SNP | C | T | CSB10 | NM_014012.4     | p.I159   |
| HM13         | 20 | 29596496 | 29596496 | Missense    | SNP | G | A | BRC18 | NM_178581.2     | p.E151K  |
| ID1          | 20 | 29657128 | 29657128 | Missense    | SNP | G | C | BRC44 | NM_002165.2     | p.E93Q   |
| FOXS1        | 20 | 29896325 | 29896325 | Missense    | SNP | C | G | CSB1  | NM_004118.3     | p.E228Q  |
| C20orf114    | 20 | 31341356 | 31341356 | Missense    | SNP | A | C | BRC29 | NM_033197.2     | p.K88Q   |
| PXMP4        | 20 | 31759335 | 31759335 | Silent      | SNP | G | A | BRC39 | NM_007238.4     | p.L159   |
| NCOA6        | 20 | 32794523 | 32794523 | Missense    | SNP | C | A | CSB1  | NM_014071.2     | p.Q1066H |
| FAM83C       | 20 | 33338327 | 33338327 | Missense    | SNP | G | A | BRC47 | NM_178468.3     | p.L557F  |
| GDF5         | 20 | 33485860 | 33485860 | Missense    | SNP | C | T | BRC7  | NM_000557.2     | p.G256E  |



|              |    |          |          |          |     |   |   |       |                 |          |
|--------------|----|----------|----------|----------|-----|---|---|-------|-----------------|----------|
| CEP250       | 20 | 33544784 | 33544784 | Silent   | SNP | C | T | CSB12 | NM_007186.1     | p.L1002  |
| ERGIC3       | 20 | 33606156 | 33606156 | Missense | SNP | G | A | BRC23 | ENST00000357394 | p.G231R  |
| RBM39        | 20 | 33776456 | 33776456 | Missense | SNP | T | C | CSB23 | NM_184234.2     | p.D151G  |
| C20orf152    | 20 | 34023979 | 34023979 | Silent   | SNP | C | T | CSB15 | NM_080834.1     | p.L22    |
| RBL1         | 20 | 35108897 | 35108897 | Silent   | SNP | G | C | CSB1  | NM_002895.2     | p.L526   |
| RBL1         | 20 | 35129863 | 35129863 | Nonsense | SNP | A | T | CSB3  | NM_002895.2     | p.L144*  |
| RPRD1B       | 20 | 36119361 | 36119361 | Silent   | SNP | G | A | BRC39 | NM_021215.3     | p.K143   |
| KIAA1755     | 20 | 36275187 | 36275187 | Nonsense | SNP | G | A | CSB1  | NM_001029864.1  | p.Q1092* |
| KIAA1219     | 20 | 36629173 | 36629173 | Missense | SNP | A | G | CSB9  | NM_020336.2     | p.I1280V |
| FAM83D       | 20 | 37004050 | 37004050 | Missense | SNP | T | C | BRC17 | NM_030919.2     | p.I203T  |
| PTPRT        | 20 | 40261295 | 40261295 | Silent   | SNP | G | A | CSB1  | NM_133170.5     | p.F849   |
| SGK2         | 20 | 41628498 | 41628498 | Silent   | SNP | C | G | BRC14 | NM_016276.3     | p.L43    |
| IFT52        | 20 | 41676020 | 41676020 | Missense | SNP | A | G | CSB34 | NM_016004.2     | p.Y201C  |
| SERINC3      | 20 | 42576036 | 42576036 | Missense | SNP | C | G | CSB1  | NM_006811.2     | p.K33N   |
| RIMS4        | 20 | 42818225 | 42818225 | Silent   | SNP | G | C | CSB1  | NM_182970.2     | p.L258   |
| SEMG1        | 20 | 43269739 | 43269739 | Missense | SNP | C | A | BRC41 | NM_003007.2     | p.H129Q  |
| SLPI         | 20 | 43315638 | 43315638 | Missense | SNP | G | C | BRC7  | NM_003064.2     | p.P79R   |
| MATN4        | 20 | 43359974 | 43359974 | Missense | SNP | G | A | CSB15 | NM_003833.3     | p.P526L  |
| DNTTIP1      | 20 | 43867385 | 43867385 | Missense | SNP | C | G | CSB1  | NM_052951.2     | p.I232M  |
| ZSWIM3       | 20 | 43940585 | 43940585 | Missense | SNP | C | G | BRC41 | NM_080752.2     | p.L661V  |
| C20orf165    | 20 | 43948730 | 43948730 | Missense | SNP | G | A | BRC20 | NM_080608.3     | p.R173W  |
| SULF2        | 20 | 45727389 | 45727389 | Missense | SNP | T | C | CSB7  | NM_018837.2     | p.K653R  |
| PREX1        | 20 | 46695970 | 46695970 | Missense | SNP | C | A | CSB34 | NM_020820.3     | p.G1113V |
| PREX1        | 20 | 46716300 | 46716300 | Missense | SNP | C | T | CSB1  | NM_020820.3     | p.G556R  |
| ARFGEF2      | 20 | 47024770 | 47024770 | Missense | SNP | G | C | BRC18 | NM_006420.2     | p.E576Q  |
| PTGIS        | 20 | 47557966 | 47557966 | Missense | SNP | G | C | BRC39 | NM_000961.3     | p.I467M  |
| LOC728671    | 20 | 47665949 | 47665949 | Missense | SNP | G | A | BRC11 | XM_001128100.1  | p.A132T  |
| ADNP         | 20 | 48941449 | 48941449 | Missense | SNP | T | G | BRC36 | NM_015339.2     | p.D1070A |
| MOCS3        | 20 | 49009607 | 49009607 | Missense | SNP | G | A | BRC44 | NM_014484.3     | p.S274N  |
| LOC100128598 | 20 | 49054199 | 49054199 | Missense | SNP | C | A | CSB1  | XM_001716142.1  | p.Q89K   |
| ATP9A        | 20 | 49663774 | 49663774 | Missense | SNP | C | T | BRC5  | NM_006045.1     | p.G807E  |
| SALL4        | 20 | 49834607 | 49834607 | Silent   | SNP | C | T | BRC18 | NM_020436.3     | p.A922   |
| C20orf107    | 20 | 54544638 | 54544638 | Nonsense | SNP | C | T | BRC16 | NM_001013646.2  | p.Q85*   |
| CTCF         | 20 | 55531569 | 55531569 | Missense | SNP | C | T | CSB1  | NM_080618.2     | p.E239K  |
| PCK1         | 20 | 55573511 | 55573511 | Missense | SNP | T | C | BRC36 | NM_002591.3     | p.L443P  |



|                     |    |          |          |          |     |   |   |       |                 |             |          |
|---------------------|----|----------|----------|----------|-----|---|---|-------|-----------------|-------------|----------|
| STX16               | 20 | 56677887 | 56677887 | Silent   | SNP | C | T | BRC39 | NM_001001433.1  | p.F176      |          |
| PHACTR3             | 20 | 57763705 | 57763705 | Silent   | SNP | G | A | CSB8  | NM_080672.3     | p.S144      |          |
| COL9A3              | 20 | 60923005 | 60923005 | Missense | SNP | G | A | CSB10 | NM_001853.3     | p.G113R     |          |
| DIDO1               | 20 | 60983253 | 60983253 | Silent   | SNP | G | C | CSB1  | NM_033081.3     | p.L1500     |          |
| DIDO1               | 20 | 60993822 | 60993822 | Missense | SNP | A | T | BRC13 | NM_033081.3     | p.W1103R    |          |
| ARFGAP1             | 20 | 61379064 | 61379064 | Silent   | SNP | C | T | CSB31 | NM_175609.2     | p.T135      |          |
| PRIC285             | 20 | 61670553 | 61670553 | Silent   | SNP | C | T | BRC12 | NM_001037335.2  | p.A444      |          |
| LOC100128998        | 20 | 61945553 | 61945553 | Silent   | SNP | G | A | BRC50 | XM_001717148.1  | p.L80       |          |
| MYT1                | 20 | 62324942 | 62324942 | Missense | SNP | A | G | CSB13 | NM_004535.2     | p.I811V     |          |
| IGHV1OR15-9         | 21 | 9884537  | 9884537  | Silent   | SNP | G | A | CSB16 | ENST00000302092 | p.A15       |          |
| HSPA13              | 21 | 14675469 | 14675469 | Missense | SNP | C | T | BRC39 | NM_006948.4     | p.D98N      |          |
| NRIP1               | 21 | 15258981 | 15258981 | Missense | SNP | C | T | CSB29 | NM_003489.3     | p.R1135H    |          |
| CHODL               | 21 | 18554396 | 18554396 | Missense | SNP | C | T | BRC39 | NM_024944.2     | p.P186S     |          |
| PRSS7               | 21 | 18677893 | 18677893 | Silent   | SNP | G | A | BRC16 | NM_002772.2     | p.L140      |          |
| ENSG0000019793<br>4 | 21 | 26845421 | 26845421 | Missense | SNP | A | G | BRC26 | ENST00000357401 | p.N91S      |          |
| ADAMTS1             | 21 | 27132255 | 27132255 | Silent   | SNP | C | T | BRC23 | NM_006988.3     | p.A806      |          |
| GRIK1               | 21 | 29847819 | 29847819 | Silent   | SNP | C | T | BRC10 | NM_000830.3     | p.T895      |          |
| GRIK1               | 21 | 29871277 | 29871277 | Missense | SNP | G | C | BRC31 | NM_000830.3     | p.L670V     |          |
| KRTAP6-3            | 21 | 30886714 | 30886714 | Missense | SNP | T | C | CSB15 | NM_181605.3     | p.Y27H      |          |
| URB1                | 21 | 32641176 | 32641176 | Silent   | SNP | G | T | BRC50 | ENST00000382751 | p.L1276     |          |
| C21orf66            | 21 | 33064030 | 33064030 | Silent   | SNP | C | G | BRC44 | NM_016631.3     | p.S146      |          |
| DNAJC28             | 21 | 33783523 | 33783523 | Silent   | SNP | C | T | BRC39 | NM_001040192.1  | p.L16       |          |
| RUNX1               | 21 | 35174726 | 35174726 | Missense | SNP | C | T | BRC18 | NM_001754.2     | p.R169K     |          |
| RUNX1               | 21 | 35174729 | 35174729 | Missense | SNP | C | T | BRC24 | NM_001754.2     | p.G168E     |          |
| RUNX1               | 21 | 35174735 | 35174735 | Missense | SNP | C | T | BRC18 | NM_001754.2     | p.R166Q     |          |
| RUNX1               | 21 | 35181062 | 35181062 | Missense | SNP | G | C | CSB14 | NM_001754.2     | p.S100C     |          |
| DOPEY2              | 21 | 36539901 | 36539901 | Silent   | SNP | C | T | CSB1  | NM_005128.2     | p.L1251     |          |
| DOPEY2              | 21 | 36539958 | 36539958 | Silent   | SNP | C | T | BRC50 | NM_005128.2     | p.S1270     |          |
| TTC3                | 21 | 37450973 | 37450973 | Missense | SNP | C | A | CSB34 | NM_001001894.1  | p.P963T     |          |
| BRWD1               | 21 | 39558315 | 39558315 | Missense | SNP | G | C | CSB1  | NM_018963.1     | p.P609R     |          |
| DSCAM               | 21 | 40662989 | 40662996 | Del      | DEL | A |   | 0     | CSB8            | NM_001389.3 | p.D185fs |
| FAM3B               | 21 | 41642430 | 41642430 | Missense | SNP | G | T | BRC50 | NM_058186.3     | p.S176I     |          |
| MX2                 | 21 | 41701987 | 41701987 | Missense | SNP | C | T | CSB29 | NM_002463.1     | p.A702V     |          |
| PRDM15              | 21 | 42147874 | 42147874 | Silent   | SNP | G | A | BRC32 | NM_022115.1     | p.H502      |          |

|                 |    |          |          |                    |     |                |   |       |                 |          |
|-----------------|----|----------|----------|--------------------|-----|----------------|---|-------|-----------------|----------|
| PRDM15          | 21 | 42147934 | 42147934 | Missense           | SNP | C              | G | BRC50 | NM_022115.1     | p.W482C  |
| PRDM15          | 21 | 42150492 | 42150492 | Silent             | SNP | G              | T | CSB12 | NM_022115.1     | p.P415   |
| PDE9A           | 21 | 43054048 | 43054048 | Silent             | SNP | C              | T | CSB20 | NM_002606.1     | p.A349   |
| PDXK            | 21 | 43993306 | 43993306 | Silent             | SNP | C              | T | BRC36 | NM_003681.4     | p.Y127   |
| ICOSLG          | 21 | 44479636 | 44479636 | Missense           | SNP | C              | T | BRC36 | NM_015259.4     | p.C215Y  |
| KRTAP10-8       | 21 | 44856472 | 44856472 | Silent             | SNP | G              | A | CSB30 | NM_198695.1     | p.T9     |
| ITGB2           | 21 | 45133173 | 45133173 | Missense           | SNP | G              | A | CSB14 | NM_000211.3     | p.P648L  |
| ADARB1          | 21 | 45388995 | 45388995 | Missense           | SNP | A              | C | BRC41 | ENST00000327861 | p.R43S   |
| COL18A1         | 21 | 45736896 | 45736896 | Missense           | SNP | C              | T | BRC38 | NM_030582.3     | p.P906L  |
| FTCD            | 21 | 46381672 | 46381672 | Missense           | SNP | G              | A | BRC47 | NM_006657.2     | p.A483V  |
| PCNT            | 21 | 46676382 | 46676382 | Missense           | SNP | G              | A | CSB1  | NM_006031.5     | p.C2859Y |
| PCNT            | 21 | 46685278 | 46685278 | Missense           | SNP | T              | G | CSB29 | NM_006031.5     | p.L3159W |
| CECR2           | 22 | 16402248 | 16402248 | Missense           | SNP | G              | A | BRC24 | ENST00000400585 | p.G784S  |
| DGCR5           | 22 | 17357106 | 17357106 | RNA                | SNP | C              | T | BRC31 | NR_002733.1     | NULL     |
| ENSG00000182490 | 22 | 17498870 | 17498870 | Missense           | SNP | C              | T | CSB19 | ENST00000383058 | p.R274H  |
| DGCR14          | 22 | 17512134 | 17512134 | Missense           | SNP | G              | A | BRC7  | NM_022719.2     | p.S7L    |
| HIRA            | 22 | 17764433 | 17764433 | Silent             | SNP | G              | A | CSB19 | NM_003325.3     | p.V177   |
| TBX1            | 22 | 18150437 | 18150437 | Silent             | SNP | G              | A | BRC11 | NM_005992.1     | p.G337   |
| RANBP1          | 22 | 18489894 | 18489894 | Missense           | SNP | G              | A | BRC31 | NM_002882.2     | p.R87H   |
| SCARF2          | 22 | 19113896 | 19113896 | Missense           | SNP | C              | T | CSB7  | NM_153334.3     | p.V451I  |
| CRYBB3          | 22 | 23928682 | 23928682 | Silent             | SNP | C              | T | BRC39 | NM_004076.3     | p.C39    |
| ADRBK2          | 22 | 24448329 | 24448329 | Missense           | SNP | G              | A | BRC35 | NM_005160.3     | p.R660H  |
| MYO18B          | 22 | 24496083 | 24496083 | Missense           | SNP | G              | C | CSB1  | NM_032608.5     | p.E507Q  |
| MYO18B          | 22 | 24552461 | 24552461 | Missense           | SNP | C              | G | CSB1  | NM_032608.5     | p.I927M  |
| SEZ6L           | 22 | 25019073 | 25019073 | Missense           | SNP | A              | G | CSB20 | NM_021115.3     | p.I266V  |
| SEZ6L           | 22 | 25073798 | 25073798 | Missense           | SNP | G              | A | CSB22 | NM_021115.3     | p.G776S  |
| HPS4            | 22 | 25196681 | 25196690 | Frame Shift<br>Del | DEL | TCACAGT<br>CCT | 0 | CSB15 | NM_022081.4     | p.G198fs |
| CRYBB1          | 22 | 25325542 | 25325542 | Missense           | SNP | G              | A | BRC35 | NM_001887.3     | p.P224L  |
| EWSR1           | 22 | 28026111 | 28026111 | Splice_Site        | SNP | G              | C | CSB1  | NM_005243.2     | e17-1    |
| RFPL1           | 22 | 28164879 | 28164879 | Silent             | SNP | C              | T | CSB1  | NM_021026.2     | p.L33    |
| ZMAT5           | 22 | 28457234 | 28457234 | Missense           | SNP | G              | T | BRC21 | NM_001003692.1  | p.P165T  |
| ENSG00000220549 | 22 | 29149172 | 29149172 | Silent             | SNP | G              | A | BRC39 | ENST00000402592 | p.V45    |
| OSBP2           | 22 | 29613526 | 29613526 | Silent             | SNP | G              | A | BRC11 | NM_030758.3     | p.A407   |

|              |    |          |          |                             |     |                  |   |       |                 |                       |             |
|--------------|----|----------|----------|-----------------------------|-----|------------------|---|-------|-----------------|-----------------------|-------------|
| SFI1         | 22 | 30301309 | 30301309 | Missense                    | SNP | C                | T | CSB1  | NM_001007467.1  | p.H339Y               |             |
| C22orf30     | 22 | 30440362 | 30440362 | Missense                    | SNP | C                | G | BRC39 | ENST00000327423 | p.E1155Q              |             |
| SLC5A1       | 22 | 30817669 | 30817669 | Silent                      | SNP | C                | T | BRC29 | NM_000343.2     | p.S400                |             |
| BPIL2        | 22 | 31163775 | 31163775 | Missense                    | SNP | G                | A | BRC41 | NM_174932.1     | p.T240I               |             |
| TIMP3        | 22 | 31585356 | 31585356 | Missense                    | SNP | G                | A | CSB1  | NM_000362.4     | p.D210N               |             |
| APOL3        | 22 | 34886689 | 34886689 | Nonsense                    | SNP | G                | C | CSB1  | NM_145640.2     | p.S66*<br>p.EEQL1820i |             |
| MYH9         | 22 | 35011125 | 35011136 | In Frame Del<br>Frame Shift | DEL | TCCAGC<br>TGCTCC |   | 0     | CSB28           | NM_002473.4           | n Frame del |
| MYH9         | 22 | 35014898 | 35014907 | Del                         | DEL | CTAGGG<br>CCCC   |   | 0     | BRC29           | NM_002473.4           | p.R1528fs   |
| MYH9         | 22 | 35025031 | 35025031 | Nonsense                    | SNP | T                | A | CSB30 | NM_002473.4     | p.K994*               |             |
| MYH9         | 22 | 35038133 | 35038133 | Missense                    | SNP | C                | G | BRC9  | NM_002473.4     | p.K545N               |             |
| FOXRED2      | 22 | 35230224 | 35230224 | Missense                    | SNP | C                | T | BRC11 | NM_001102371.1  | p.E306K               |             |
| CARD10       | 22 | 36222449 | 36222449 | Nonsense                    | SNP | A                | T | BRC16 | NM_014550.3     | p.L671*               |             |
| C22orf23     | 22 | 36673344 | 36673344 | Missense                    | SNP | G                | A | BRC50 | NM_032561.2     | p.S80L                |             |
| SOX10        | 22 | 36703826 | 36703826 | Missense                    | SNP | G                | C | BRC41 | NM_006941.3     | p.P231A               |             |
| PICK1        | 22 | 36798953 | 36798953 | Missense                    | SNP | A                | T | BRC17 | NM_001039583.1  | p.M231L               |             |
| KCNJ4        | 22 | 37153967 | 37153967 | Silent                      | SNP | C                | T | CSB16 | NM_004981.1     | p.S39                 |             |
|              |    |          |          |                             |     | GTAGATT<br>T     |   |       |                 |                       |             |
| FLJ23865     | 22 | 37900224 | 37900239 | Frame Shift<br>Del          | DEL | TCCATCT<br>G     |   | 0     | BRC30           | XM_001723522.1        | p.Q46fs     |
| CACNA1I      | 22 | 38367074 | 38367074 | Missense                    | SNP | C                | A | CSB7  | NM_021096.1     | p.P333T               |             |
| CACNA1I      | 22 | 38372696 | 38372696 | Silent                      | SNP | C                | G | BRC38 | NM_021096.1     | p.V442                |             |
| TNRC6B       | 22 | 39047107 | 39047107 | Missense                    | SNP | T                | C | BRC44 | NM_015088.1     | p.L1571P              |             |
| SGSM3        | 22 | 39131719 | 39131719 | Missense                    | SNP | G                | A | CSB3  | NM_015705.4     | p.D247N               |             |
| PHF5A        | 22 | 40193472 | 40193472 | Missense                    | SNP | G                | A | CSB25 | NM_032758.3     | p.R57C                |             |
| XRCC6        | 22 | 40389675 | 40389675 | Missense                    | SNP | G                | A | BRC7  | NM_001469.3     | p.M580I               |             |
| SEPT3        | 22 | 40718687 | 40718687 | Missense                    | SNP | G                | A | BRC44 | NM_145733.5     | p.R280Q               |             |
| CYP2D6       | 22 | 40853579 | 40853579 | Silent                      | SNP | G                | A | BRC51 | NM_000106.4     | p.R329                |             |
| SCUBE1       | 22 | 41944329 | 41944329 | Silent                      | SNP | G                | A | BRC13 | NM_173050.2     | p.I589                |             |
| PHF21B       | 22 | 43660072 | 43660072 | Silent                      | SNP | G                | C | BRC31 | NM_138415.1     | p.V425                |             |
| SMC1B        | 22 | 44173639 | 44173639 | Missense                    | SNP | C                | A | BRC35 | NM_148674.3     | p.Q371H               |             |
| PKDREJ       | 22 | 45034150 | 45034150 | Missense                    | SNP | C                | A | BRC51 | NM_006071.1     | p.G1245V              |             |
| LOC100129944 | 22 | 48436188 | 48436188 | Silent                      | SNP | A                | G | BRC50 | XM_001725094.1  | p.T83                 |             |
| TUBGCP6      | 22 | 49001675 | 49001675 | Silent                      | SNP | G                | A | BRC38 | NM_020461.3     | p.H1080               |             |
| NCAPH2       | 22 | 49307068 | 49307068 | Missense                    | SNP | G                | A | CSB8  | NM_152299.4     | p.E345K               |             |

|                     |    |          |          |          |     |   |   |       |                 |         |
|---------------------|----|----------|----------|----------|-----|---|---|-------|-----------------|---------|
| TYMP                | 22 | 49312556 | 49312556 | Silent   | SNP | G | C | CSB1  | NM_001953.1     | p.L223  |
| ODF3B               | 22 | 49316601 | 49316601 | Missense | SNP | G | T | CSB1  | ENST00000405135 | p.P117T |
| CHKB                | 22 | 49365090 | 49365090 | Missense | SNP | C | G | BRC39 | NM_005198.3     | p.K321N |
| CHKB                | 22 | 49365325 | 49365325 | Missense | SNP | C | T | BRC39 | NM_005198.3     | p.E291K |
| ENSG0000022307<br>3 | MT | 178      | 178      | RNA      | SNP | A | G | CSB22 | ENST00000411141 | NULL    |
| ENSG0000021145<br>9 | MT | 711      | 711      | RNA      | SNP | G | A | CSB24 | ENST00000389680 | NULL    |
| ENSG0000021145<br>9 | MT | 859      | 859      | RNA      | SNP | G | A | CSB6  | ENST00000389680 | NULL    |
| ENSG0000021145<br>9 | MT | 1364     | 1364     | RNA      | SNP | G | A | CSB3  | ENST00000389680 | NULL    |
| ENSG0000021008<br>2 | MT | 1696     | 1696     | RNA      | SNP | T | C | BRC39 | ENST00000387347 | NULL    |
| ENSG0000021008<br>2 | MT | 2151     | 2151     | RNA      | SNP | G | A | CSB13 | ENST00000387347 | NULL    |
| ENSG0000021008<br>2 | MT | 2348     | 2348     | RNA      | SNP | T | C | CSB19 | ENST00000387347 | NULL    |
| ENSG0000021008<br>2 | MT | 2911     | 2911     | RNA      | SNP | G | A | CSB28 | ENST00000387347 | NULL    |
| ENSG0000020908<br>2 | MT | 3244     | 3244     | RNA      | SNP | A | G | CSB12 | ENST00000386347 | NULL    |
| MT-ND2              | MT | 5208     | 5208     | Silent   | SNP | C | T | CSB15 | ENST00000361453 | p.S246  |
| MT-ND2              | MT | 5329     | 5329     | Missense | SNP | C | T | CSB32 | ENST00000361453 | p.L287F |
| ENSG0000021014<br>4 | MT | 5839     | 5839     | RNA      | SNP | G | A | CSB26 | ENST00000387409 | NULL    |
| MT-CO1              | MT | 6740     | 6740     | Nonsense | SNP | C | A | BRC18 | ENST00000361624 | p.S279* |
| MT-CO1              | MT | 6751     | 6751     | Silent   | SNP | C | T | BRC9  | ENST00000361624 | p.L283  |
| MT-CO1              | MT | 7229     | 7229     | Missense | SNP | A | T | BRC39 | ENST00000361624 | p.D442V |
| MT-CO3              | MT | 9362     | 9362     | Missense | SNP | T | C | BRC34 | ENST00000362079 | p.L52P  |
| MT-CO3              | MT | 9967     | 9967     | Missense | SNP | G | A | CSB13 | ENST00000362079 | p.V254I |
| MT-ND3              | MT | 10069    | 10069    | Missense | SNP | G | A | BRC35 | ENST00000361227 | p.A4T   |
| MT-ND3              | MT | 10369    | 10369    | Missense | SNP | T | C | CSB22 | ENST00000361227 | p.Y104H |
| MT-ND4              | MT | 10523    | 10523    | Missense | SNP | G | A | BRC32 | ENST00000361335 | p.G18E  |
| MT-ND4              | MT | 10947    | 10947    | Missense | SNP | A | G | CSB9  | ENST00000361381 | p.T63A  |
| MT-ND4              | MT | 11252    | 11252    | Silent   | SNP | A | G | CSB22 | ENST00000361381 | p.L164  |
| MT-ND4              | MT | 11694    | 11694    | Missense | SNP | G | A | BRC34 | ENST00000361381 | p.A312T |
| MT-ND4              | MT | 11800    | 11800    | Missense | SNP | G | A | BRC24 | ENST00000361381 | p.G347E |
| MT-ND4              | MT | 11819    | 11819    | Silent   | SNP | A | G | CSB1  | ENST00000361381 | p.P353  |
| MT-ND4              | MT | 11866    | 11866    | Missense | SNP | T | C | BRC51 | ENST00000361381 | p.L369S |

|                |    |          |          |          |     |   |   |       |                 |          |
|----------------|----|----------|----------|----------|-----|---|---|-------|-----------------|----------|
| MT-ND4         | MT | 12016    | 12016    | Missense | SNP | T | C | BRC39 | ENST00000361381 | p.L419P  |
| MT-ND5         | MT | 12455    | 12455    | Missense | SNP | G | A | CSB22 | ENST00000361567 | p.V40I   |
| MT-ND5         | MT | 12613    | 12613    | Silent   | SNP | A | G | CSB22 | ENST00000361567 | p.V92    |
| MT-ND5         | MT | 12706    | 12706    | Silent   | SNP | T | C | CSB13 | ENST00000361567 | p.I123   |
| MT-ND5         | MT | 13800    | 13800    | Missense | SNP | T | C | BRC33 | ENST00000361567 | p.L488P  |
| MT-ND5         | MT | 13895    | 13895    | Missense | SNP | T | C | BRC39 | ENST00000361567 | p.F520L  |
| MT-ND5         | MT | 13955    | 13955    | Silent   | SNP | C | T | CSB28 | ENST00000361567 | p.L540   |
| MT-CYB         | MT | 14832    | 14832    | Missense | SNP | G | A | CSB17 | ENST00000361789 | p.A29T   |
| MT-CYB         | MT | 15453    | 15453    | Missense | SNP | C | A | CSB22 | ENST00000361789 | p.L236I  |
| MT-CYB         | MT | 15675    | 15675    | Missense | SNP | T | C | BRC24 | ENST00000361789 | p.S310P  |
| MT-CYB         | MT | 15823    | 15823    | Missense | SNP | T | C | BRC29 | ENST00000361789 | p.F359S  |
|                | NT |          |          |          |     |   |   |       |                 |          |
|                | _1 |          |          |          |     |   |   |       |                 |          |
|                | 13 |          |          |          |     |   |   |       |                 |          |
|                | 94 |          |          |          |     |   |   |       |                 |          |
| KIR2DS2        | 9  | 135024   | 135024   | Missense | SNP | A | T | CSB25 | ENST00000400833 | p.Q110L  |
|                | NT |          |          |          |     |   |   |       |                 |          |
|                | _1 |          |          |          |     |   |   |       |                 |          |
|                | 13 |          |          |          |     |   |   |       |                 |          |
|                | 95 |          |          |          |     |   |   |       |                 |          |
| ENSG0000021288 | 4  | 54089    | 54089    | Missense | SNP | T | G | CSB14 | ENST00000391570 | p.L91R   |
| 3              |    |          |          |          |     |   |   |       |                 |          |
| DHR SX         | X  | 2219556  | 2219556  | Silent   | SNP | G | C | CSB7  | NM_145177.2     | p.V125   |
| GYG2           | X  | 2809191  | 2809191  | Silent   | SNP | C | T | CSB22 | NM_003918.1     | p.I481   |
| ARSD           | X  | 2848740  | 2848740  | Missense | SNP | C | T | BRC32 | NM_001669.2     | p.R114Q  |
| NLGN4X         | X  | 5957388  | 5957388  | Silent   | SNP | G | A | CSB8  | NM_020742.2     | p.D186   |
| SHROOM2        | X  | 9867242  | 9867242  | Missense | SNP | G | A | CSB31 | NM_001649.2     | p.E1383K |
| SHROOM2        | X  | 9874849  | 9874849  | Missense | SNP | T | C | CSB8  | NM_001649.2     | p.Y1575H |
| MID1           | X  | 10377466 | 10377466 | Missense | SNP | G | A | CSB22 | NM_000381.2     | p.T649M  |
| ARHGAP6        | X  | 11070333 | 11070333 | Missense | SNP | T | G | BRC15 | NM_013427.2     | p.D733A  |
| FRMPD4         | X  | 12537851 | 12537851 | Silent   | SNP | G | A | BRC51 | NM_014728.2     | p.R83    |
| TLR7           | X  | 12814643 | 12814643 | Silent   | SNP | A | T | BRC15 | NM_016562.3     | p.A365   |
| TLR8           | X  | 12849391 | 12849391 | Missense | SNP | G | A | CSB29 | NM_138636.3     | p.G771R  |
| TCEANC         | X  | 13590865 | 13590865 | Missense | SNP | C | T | BRC51 | NM_152634.2     | p.S136F  |
| MOSPD2         | X  | 14831031 | 14831031 | Missense | SNP | G | A | CSB16 | NM_152581.2     | p.M187I  |
| MOSPD2         | X  | 14842565 | 14842565 | Missense | SNP | T | A | CSB20 | NM_152581.2     | p.F338I  |
| FIGF           | X  | 15283313 | 15283313 | Nonsense | SNP | G | T | BRC30 | NM_004469.2     | p.S174*  |
| CTPS2          | X  | 16621479 | 16621479 | Missense | SNP | C | G | BRC50 | NM_019857.1     | p.R164T  |
| RBBP7          | X  | 16780118 | 16780118 | Missense | SNP | C | T | BRC7  | NM_002893.3     | p.D338N  |

|         |   |          |          |              |     |   |              |       |                |                       |
|---------|---|----------|----------|--------------|-----|---|--------------|-------|----------------|-----------------------|
| PPEF1   | X | 18753835 | 18753835 | Silent       | SNP | C | T            | BRC50 | NM_006240.2    | p.L571                |
| PHKA2   | X | 18829613 | 18829613 | Missense     | SNP | G | T            | CSB2  | NM_000292.2    | p.P980T               |
| GPR64   | X | 18936114 | 18936114 | Missense     | SNP | G | A            | BRC33 | NM_001079858.1 | p.L491F               |
| YY2     | X | 21785547 | 21785547 | Missense     | SNP | G | T            | BRC14 | NM_206923.2    | p.V342L               |
| ZNF645  | X | 22201343 | 22201343 | Missense     | SNP | C | T            | CSB12 | NM_152577.2    | p.A105V               |
| DDX53   | X | 22928263 | 22928263 | Missense     | SNP | G | C            | BRC26 | NM_182699.2    | p.K56N                |
| SAT1    | X | 23711740 | 23711740 | Silent       | SNP | T | G            | BRC50 | NM_002970.1    | p.T37                 |
| MAGEB6  | X | 26122753 | 26122753 | Missense     | SNP | C | T            | BRC4  | NM_173523.2    | p.S290L               |
| MAGEB4  | X | 30170819 | 30170819 | Missense     | SNP | C | T            | BRC49 | NM_002367.2    | p.R216C               |
| DMD     | X | 31407037 | 31407037 | Silent       | SNP | G | A            | CSB1  | NM_004006.2    | p.L2884               |
| DMD     | X | 31764847 | 31764847 | Missense     | SNP | A | C            | BRC41 | NM_004006.2    | p.I2370R              |
| DMD     | X | 32292631 | 32292631 | Missense     | SNP | C | A            | CSB1  | NM_004006.2    | p.D1715Y              |
| DMD     | X | 32419363 | 32419363 | Silent       | SNP | G | A            | CSB22 | NM_004006.2    | p.T858                |
| FAM47A  | X | 34060052 | 34060052 | Missense     | SNP | C | A            | BRC51 | NM_203408.2    | p.D89Y                |
| TMEM47  | X | 34567379 | 34567379 | Silent       | SNP | G | A            | BRC28 | NM_031442.3    | p.I91                 |
| MAGEB16 | X | 35730507 | 35730507 | In Frame Ins | INS |   | GAAGA<br>0 G | BRC41 | NM_001099921.1 | p.93in Frame<br>insEE |
| FAM47C  | X | 36936727 | 36936727 | Missense     | SNP | C | T            | BRC5  | NM_001013736.1 | p.S108L               |
| FAM47C  | X | 36939095 | 36939095 | Silent       | SNP | G | A            | BRC13 | NM_001013736.1 | p.L897                |
| SRPX    | X | 37918375 | 37918375 | Missense     | SNP | C | T            | CSB1  | NM_006307.3    | p.D111N               |
| RPGR    | X | 38029771 | 38029771 | Missense     | SNP | T | A            | BRC35 | NM_001034853.2 | p.N1142I              |
| BCOR    | X | 39798141 | 39798141 | Missense     | SNP | C | G            | BRC39 | NM_017745.1    | p.E1606Q              |
| USP9X   | X | 40910205 | 40910205 | Missense     | SNP | G | A            | BRC13 | NM_001039590.2 | p.E708K               |
| USP9X   | X | 40960563 | 40960563 | Missense     | SNP | G | A            | CSB1  | NM_001039590.2 | p.M1933I              |
| USP9X   | X | 40961443 | 40961443 | Nonsense     | SNP | G | T            | CSB1  | NM_001039590.2 | p.E2038*              |
| CASK    | X | 41354172 | 41354172 | Missense     | SNP | C | T            | CSB1  | NM_003688.2    | p.D362N               |
| GPR82   | X | 41471496 | 41471496 | Silent       | SNP | C | T            | CSB1  | NM_080817.3    | p.V91                 |
| UTX     | X | 44826823 | 44826823 | Nonsense     | SNP | C | A            | BRC29 | NM_021140.2    | p.S1068*              |
| RGN     | X | 46836026 | 46836026 | Missense     | SNP | C | T            | CSB27 | NM_004683.4    | p.R190C               |
| CFP     | X | 47371133 | 47371133 | Missense     | SNP | G | A            | CSB15 | NM_002621.1    | p.T308I               |
| ZNF81   | X | 47659282 | 47659282 | Missense     | SNP | T | A            | BRC41 | NM_007137.2    | p.I98N                |
| ZNF182  | X | 47721935 | 47721935 | Missense     | SNP | A | T            | BRC7  | NM_006962.1    | p.N165K               |
| ZNF630  | X | 47802842 | 47802842 | Missense     | SNP | G | A            | BRC41 | NM_001037735.2 | p.H521Y               |
| SLC38A5 | X | 48204048 | 48204048 | Silent       | SNP | C | T            | CSB10 | NM_033518.2    | p.P333                |
| TBC1D25 | X | 48303528 | 48303528 | Missense     | SNP | A | C            | BRC35 | NM_002536.2    | p.T430P               |

|              |   |          |          |             |     |   |   |       |                 |          |
|--------------|---|----------|----------|-------------|-----|---|---|-------|-----------------|----------|
| LOC100128587 | X | 48485258 | 48485258 | Silent      | SNP | C | T | BRC51 | XM_001719769.1  | p.P8     |
| GATA1        | X | 48534575 | 48534575 | Missense    | SNP | G | C | CSB1  | NM_002049.3     | p.E39Q   |
| OTUD5        | X | 48666245 | 48666245 | Nonsense    | SNP | G | T | BRC39 | NM_017602.1     | p.S436*  |
| MAGIX        | X | 48909463 | 48909463 | Silent      | SNP | C | G | CSB1  | NM_024859.1     | p.L262   |
| CACNA1F      | X | 48949105 | 48949105 | Missense    | SNP | C | T | BRC20 | NM_005183.2     | p.R1873H |
| DGKK         | X | 50148268 | 50148268 | Missense    | SNP | G | A | CSB14 | ENST00000376025 | p.T672I  |
| XAGE3        | X | 52912194 | 52912194 | Silent      | SNP | C | T | CSB1  | NM_130776.1     | p.E60    |
| JARID1C      | X | 53245037 | 53245037 | Missense    | SNP | A | G | BRC18 | NM_004187.2     | p.F697S  |
| HUWE1        | X | 53620725 | 53620725 | Missense    | SNP | C | T | BRC11 | NM_031407.4     | p.R1915K |
| PHF8         | X | 54028108 | 54028108 | Missense    | SNP | C | T | BRC19 | NM_015107.2     | p.D803N  |
| FGD1         | X | 54511983 | 54511983 | Missense    | SNP | C | G | CSB1  | NM_004463.2     | p.E385Q  |
| MAGED2       | X | 54852494 | 54852494 | Missense    | SNP | C | T | BRC7  | NM_014599.4     | p.S2F    |
| ALAS2        | X | 55069011 | 55069011 | Missense    | SNP | G | C | CSB1  | NM_000032.4     | p.Q50E   |
| MAGEH1       | X | 55496088 | 55496088 | Silent      | SNP | C | A | BRC50 | NM_014061.3     | p.R186   |
| ARHGEF9      | X | 62842945 | 62842945 | Missense    | SNP | C | T | BRC42 | NM_015185.2     | p.R100Q  |
| MTMR8        | X | 63405496 | 63405496 | Silent      | SNP | G | A | BRC13 | NM_017677.2     | p.T587   |
| AR           | X | 66847982 | 66847982 | Missense    | SNP | G | C | CSB1  | NM_000044.2     | p.K633N  |
| EFNB1        | X | 67977165 | 67977165 | Silent      | SNP | C | A | CSB22 | NM_004429.4     | p.V328   |
| TEX11        | X | 69815429 | 69815429 | Missense    | SNP | T | C | CSB33 | NM_001003811.1  | p.M413V  |
| GJB1         | X | 70360736 | 70360736 | Missense    | SNP | G | A | CSB13 | NM_000166.5     | p.V152I  |
| TAF1         | X | 70591334 | 70591334 | Missense    | SNP | C | G | BRC31 | NM_004606.3     | p.Q1634E |
| NHSL2        | X | 71277282 | 71277282 | Silent      | SNP | A | G | BRC8  | NM_001013627.1  | p.Q687   |
| ERCC6L       | X | 71343555 | 71343555 | Missense    | SNP | C | A | BRC39 | NM_017669.2     | p.R596I  |
| LPAR4        | X | 77897817 | 77897817 | Nonsense    | SNP | C | A | CSB31 | NM_005296.2     | p.Y265*  |
| P2RY10       | X | 78103248 | 78103248 | Missense    | SNP | C | G | BRC44 | NM_014499.2     | p.A192G  |
| BRWD3        | X | 79819343 | 79819343 | Silent      | SNP | T | C | CSB2  | NM_153252.3     | p.G1610  |
| BRWD3        | X | 79829084 | 79829084 | Missense    | SNP | C | A | CSB22 | NM_153252.3     | p.L1313F |
| BRWD3        | X | 79934008 | 79934008 | Splice_Site | SNP | C | T | BRC47 | NM_153252.3     | e6+1     |
| HDX          | X | 83610620 | 83610620 | Missense    | SNP | C | G | CSB2  | NM_144657.3     | p.R256T  |
| APOOL        | X | 84229311 | 84229311 | Missense    | SNP | G | A | CSB1  | NM_198450.3     | p.D260N  |
| ZNF711       | X | 84412901 | 84412901 | Missense    | SNP | A | G | BRC22 | NM_021998.4     | p.H566R  |
| POF1B        | X | 84449863 | 84449863 | Missense    | SNP | C | G | BRC13 | NM_024921.3     | p.D325H  |
| TGIF2LX      | X | 89064225 | 89064225 | Missense    | SNP | T | G | BRC38 | NM_138960.3     | p.L162W  |
| TGIF2LX      | X | 89064374 | 89064374 | Missense    | SNP | G | A | BRC19 | NM_138960.3     | p.A212T  |
| DIAPH2       | X | 95880324 | 95880324 | Silent      | SNP | G | A | CSB22 | NM_006729.4     | p.A83    |



|          |   |           |           |             |     |   |   |       |                 |         |
|----------|---|-----------|-----------|-------------|-----|---|---|-------|-----------------|---------|
| TNMD     | X | 99741231  | 99741231  | Missense    | SNP | G | T | BRC15 | NM_022144.2     | p.G272V |
| DRP2     | X | 100384554 | 100384554 | Silent      | SNP | A | T | BRC31 | NM_001939.2     | p.S327  |
| GLA      | X | 100545499 | 100545499 | Missense    | SNP | C | A | BRC31 | NM_000169.2     | p.D109Y |
| GPRASP2  | X | 101857424 | 101857424 | Missense    | SNP | A | T | CSB19 | NM_001004051.1  | p.D324V |
| TCEAL4   | X | 102728686 | 102728686 | Missense    | SNP | G | C | CSB1  | NM_001006935.1  | p.E143Q |
| IL1RAPL2 | X | 104885901 | 104885901 | Missense    | SNP | G | A | CSB1  | NM_017416.1     | p.E423K |
| NRK      | X | 105070562 | 105070562 | Silent      | SNP | G | A | BRC13 | ENST00000243300 | p.L1281 |
| MORC4    | X | 106123226 | 106123226 | Silent      | SNP | T | C | CSB16 | NM_024657.1     | p.V66   |
| FRMPD3   | X | 106730490 | 106730490 | Silent      | SNP | C | T | BRC13 | XM_042978.1     | p.G888  |
| MID2     | X | 107035513 | 107035513 | Splice_Site | SNP | G | A | BRC35 | NM_012216.3     | e4+1    |
| CAPN6    | X | 110378830 | 110378830 | Missense    | SNP | C | G | BRC39 | NM_014289.2     | p.E424Q |
| TRPC5    | X | 111082284 | 111082284 | Silent      | SNP | T | C | CSB34 | NM_012471.2     | p.K7    |
| AMOT     | X | 111921851 | 111921851 | Missense    | SNP | T | G | BRC51 | NM_133265.1     | p.Q188H |
| LRCH2    | X | 114306421 | 114306421 | Missense    | SNP | C | T | BRC7  | NM_020871.3     | p.E418K |
| AGTR2    | X | 115218111 | 115218111 | Missense    | SNP | G | A | BRC7  | NM_000686.4     | p.V184I |
| AGTR2    | X | 115218313 | 115218313 | Missense    | SNP | G | A | BRC28 | NM_000686.4     | p.R251H |
| KLHL13   | X | 116919874 | 116919874 | Missense    | SNP | G | A | BRC29 | NM_033495.2     | p.P477L |
| KLHL13   | X | 116927862 | 116927862 | Missense    | SNP | G | A | BRC39 | NM_033495.2     | p.R266C |
| DOCK11   | X | 117560965 | 117560965 | Missense    | SNP | G | C | CSB1  | NM_144658.3     | p.E90Q  |
| DOCK11   | X | 117563354 | 117563354 | Missense    | SNP | G | C | CSB1  | NM_144658.3     | p.E145Q |
| KIAA1210 | X | 118105771 | 118105771 | Silent      | SNP | C | T | BRC31 | NM_020721.1     | p.G1150 |
| NKRF     | X | 118608483 | 118608483 | Silent      | SNP | C | T | CSB1  | NM_017544.2     | p.L311  |
| AKAP14   | X | 118921611 | 118921611 | Missense    | SNP | C | T | CSB14 | ENST00000371425 | p.P88L  |
| GLUD2    | X | 120009975 | 120009975 | Silent      | SNP | C | T | BRC37 | NM_012084.3     | p.H252  |
| THOC2    | X | 122668448 | 122668448 | Missense    | SNP | G | C | CSB1  | NM_001081550.1  | p.H55D  |
| STAG2    | X | 123017718 | 123017718 | Missense    | SNP | C | T | BRC35 | NM_001042749.1  | p.S419L |
| STAG2    | X | 123027769 | 123027769 | Silent      | SNP | C | A | BRC50 | NM_001042749.1  | p.I720  |
| SH2D1A   | X | 123308179 | 123308179 | Silent      | SNP | C | T | CSB12 | NM_002351.1     | p.D2    |
| ODZ1     | X | 123613457 | 123613457 | Missense    | SNP | T | A | CSB9  | NM_014253.2     | p.T523S |
| CXorf64  | X | 125783186 | 125783186 | Missense    | SNP | G | A | BRC31 | ENST00000371125 | p.R295K |
| ACTRT1   | X | 127013347 | 127013347 | Silent      | SNP | G | A | BRC18 | NM_138289.2     | p.L174  |
| SMARCA1  | X | 128469603 | 128469603 | Missense    | SNP | G | C | CSB1  | NM_003069.3     | p.S321C |
| OCRL     | X | 128538066 | 128538066 | Silent      | SNP | C | T | BRC50 | NM_000276.3     | p.L657  |
| ELF4     | X | 129029052 | 129029052 | Silent      | SNP | G | T | BRC24 | NM_001421.1     | p.P439  |
| ZNF280C  | X | 129198208 | 129198208 | Missense    | SNP | C | G | CSB1  | NM_017666.3     | p.D194H |



|              |   |           |           |             |     |   |   |       |                 |          |
|--------------|---|-----------|-----------|-------------|-----|---|---|-------|-----------------|----------|
| SLC25A14     | X | 129326343 | 129326343 | Missense    | SNP | G | A | CSB33 | NM_003951.2     | p.D219N  |
| ENOX2        | X | 129629187 | 129629187 | Missense    | SNP | T | C | BRC13 | NM_182314.2     | p.Q331R  |
| ENOX2        | X | 129629202 | 129629202 | Missense    | SNP | G | C | BRC39 | NM_182314.2     | p.S326C  |
| FLJ30058     | X | 130043427 | 130043427 | Missense    | SNP | G | C | CSB22 | NM_144967.3     | p.G36A   |
| MST4         | X | 131016383 | 131016383 | Missense    | SNP | G | A | CSB19 | NM_016542.1     | p.R29H   |
| USP26        | X | 131989404 | 131989404 | Missense    | SNP | C | G | BRC48 | NM_031907.1     | p.E171Q  |
| TFDP3        | X | 132178893 | 132178893 | Missense    | SNP | G | C | CSB1  | NM_016521.2     | p.S294C  |
| MIRN424      | X | 133508343 | 133508343 | RNA         | SNP | G | T | CSB32 | ENST00000362227 | NULL     |
| PLAC1        | X | 133527974 | 133527974 | Silent      | SNP | C | T | CSB1  | NM_021796.3     | p.K135   |
| LOC100128949 | X | 133983708 | 133983708 | Missense    | SNP | G | A | CSB29 | XM_001720075.1  | p.G108R  |
| LOC650024    | X | 134175942 | 134175942 | Silent      | SNP | G | A | CSB28 | XM_001715421.1  | p.A139   |
| LOC644717    | X | 134602695 | 134602695 | Splice_Site | SNP | C | G | BRC12 | XR_037249.1     | NULL     |
| LOC644717    | X | 134637410 | 134637410 | RNA         | SNP | C | A | CSB1  | XR_037249.1     | NULL     |
| SAGE1        | X | 134822228 | 134822228 | Silent      | SNP | G | A | BRC41 | NM_018666.2     | p.K868   |
| GPR112       | X | 135257364 | 135257364 | Missense    | SNP | C | A | BRC50 | NM_153834.3     | p.S1278Y |
| GPR112       | X | 135259247 | 135259247 | Missense    | SNP | G | A | BRC39 | NM_153834.3     | p.E1906K |
| GPR112       | X | 135271303 | 135271303 | Missense    | SNP | G | A | CSB1  | NM_153834.3     | p.E2390K |
| GPR112       | X | 135307719 | 135307719 | Missense    | SNP | C | G | CSB1  | NM_153834.3     | p.S2733C |
| MCF2         | X | 138526283 | 138526283 | Missense    | SNP | C | G | BRC39 | NM_001099855.1  | p.D399H  |
| ATP11C       | X | 138698131 | 138698131 | Missense    | SNP | C | A | CSB33 | NM_173694.1     | p.C472F  |
| MAGEC3       | X | 140796895 | 140796895 | Missense    | SNP | G | A | BRC7  | NM_138702.1     | p.E186K  |
| MAGEC3       | X | 140812728 | 140812728 | Missense    | SNP | G | T | CSB22 | NM_138702.1     | p.E506D  |
| CXorf1       | X | 144716957 | 144716957 | Missense    | SNP | A | G | BRC47 | NM_004709.2     | p.I24V   |
| AFF2         | X | 147845835 | 147845835 | Missense    | SNP | A | G | CSB15 | NM_002025.2     | p.K854E  |
| CNGA2        | X | 150661759 | 150661759 | Missense    | SNP | G | A | BRC3  | NM_005140.1     | p.R193Q  |
| MAGEA4       | X | 150843498 | 150843498 | Missense    | SNP | G | A | BRC4  | NM_001011548.1  | p.E236K  |
| GABRA3       | X | 151087367 | 151087367 | Missense    | SNP | G | A | BRC26 | NM_000808.3     | p.R490C  |
| GABRQ        | X | 151569558 | 151569558 | Missense    | SNP | C | T | CSB34 | NM_018558.1     | p.R254C  |
| GABRQ        | X | 151571993 | 151571993 | Missense    | SNP | G | A | CSB9  | NM_018558.1     | p.E498K  |
| MAGEA6       | X | 151620281 | 151620281 | Missense    | SNP | C | G | BRC13 | NM_005363.2     | p.F105L  |
| MAGEA12      | X | 151650623 | 151650623 | Silent      | SNP | G | A | BRC39 | NM_005367.4     | p.L278   |
| ZNF185       | X | 151861008 | 151861008 | Missense    | SNP | G | A | BRC31 | ENST00000318504 | p.E34K   |
| ATP2B3       | X | 152483653 | 152483653 | Missense    | SNP | C | A | CSB22 | NM_001001344.1  | p.D1080E |
| ABCD1        | X | 152655896 | 152655896 | Silent      | SNP | C | A | BRC20 | NM_000033.3     | p.I495   |
| HCFC1        | X | 152875300 | 152875300 | Missense    | SNP | C | A | BRC7  | NM_005334.2     | p.V869F  |

|        |   |           |           |          |     |   |   |       |             |          |
|--------|---|-----------|-----------|----------|-----|---|---|-------|-------------|----------|
| FLNA   | X | 153246440 | 153246440 | Missense | SNP | C | T | CSB27 | NM_001456.1 | p.V591I  |
| PLXNA3 | X | 153350660 | 153350660 | Missense | SNP | A | T | CSB22 | NM_017514.3 | p.D1501V |
| CTAG2  | X | 153534736 | 153534736 | Missense | SNP | G | A | CSB28 | NM_020994.2 | p.P83L   |
| MPP1   | X | 153663230 | 153663230 | Nonsense | SNP | C | A | BRC18 | NM_002436.2 | p.E330*  |
| BRCC3  | X | 153953038 | 153953038 | Silent   | SNP | C | T | CSB1  | NM_024332.1 | p.L14    |
| BRCC3  | X | 154001532 | 154001532 | Missense | SNP | G | T | CSB3  | NM_024332.1 | p.E288D  |
| SPRY3  | X | 154657112 | 154657112 | Missense | SNP | C | G | CSB1  | NM_005840.1 | p.L129V  |

### Supplementary Table 5a: Tier1 somatic mutations

Shown are tier1 coding somatic mutations identified and validated in the 46 whole genome sequenced luminal breast cancer cases and tier1 somatic mutations detected in exome capture sequencing data from 31 tumours. Tier1 mutations that occur exclusively within annotated pseudogenes or transcripts with an incomplete ORF are not shown.

| Seq_ID | Patient_ID | Seq_Type |
|--------|------------|----------|
| BRC3   | 15991      | WGS      |
| BRC4   | 804        | WGS      |
| BRC5   | 807        | WGS      |
| BRC6   | 814        | WGS      |
| BRC7   | 828        | WGS      |
| BRC8   | 834        | WGS      |
| BRC9   | 837        | WGS      |
| BRC10  | 16041      | WGS      |
| BRC11  | 15601      | WGS      |
| BRC12  | 15736      | WGS      |
| BRC13  | 16024      | WGS      |
| BRC14  | 15687      | WGS      |
| BRC15  | 16252      | WGS      |
| BRC16  | 15760      | WGS      |
| BRC17  | 16227      | WGS      |
| BRC18  | 16319      | WGS      |
| BRC19  | 16347      | WGS      |
| BRC20  | 16454      | WGS      |
| BRC21  | 15583      | WGS      |
| BRC22  | 15714      | WGS      |
| BRC23  | 16187      | WGS      |
| BRC24  | 16314      | WGS      |
| BRC25  | 16350      | WGS      |
| BRC26  | 16357      | WGS      |
| BRC28  | 16180      | WGS      |
| BRC29  | 16062      | WGS      |
| BRC30  | 16481      | WGS      |
| BRC31  | 15910      | WGS      |

|       |       |       |
|-------|-------|-------|
| BRC32 | 16111 | WGS   |
| BRC33 | 15984 | WGS   |
| BRC34 | 16220 | WGS   |
| BRC35 | 15953 | WGS   |
| BRC36 | 15990 | WGS   |
| BRC37 | 15970 | WGS   |
| BRC38 | 16178 | WGS   |
| BRC39 | 16300 | WGS   |
| BRC40 | 15917 | WGS   |
| BRC41 | 15945 | WGS   |
| BRC42 | 16431 | WGS   |
| BRC44 | 15985 | WGS   |
| BRC47 | 16277 | WGS   |
| BRC48 | 16408 | WGS   |
| BRC49 | 16589 | WGS   |
| BRC50 | 16107 | WGS   |
| BRC51 | 820   | WGS   |
| BRC52 | 16918 | WGS   |
| CSB1  | 15544 | Exome |
| CSB2  | 15574 | Exome |
| CSB3  | 15901 | Exome |
| CSB5  | 15952 | Exome |
| CSB6  | 15976 | Exome |
| CSB7  | 15980 | Exome |
| CSB8  | 16007 | Exome |
| CSB9  | 16043 | Exome |
| CSB10 | 16074 | Exome |
| CSB12 | 16148 | Exome |
| CSB13 | 16170 | Exome |
| CSB14 | 16171 | Exome |

|       |       |       |
|-------|-------|-------|
| CSB15 | 16202 | Exome |
| CSB16 | 16216 | Exome |
| CSB17 | 16237 | Exome |
| CSB19 | 16315 | Exome |
| CSB20 | 16326 | Exome |
| CSB21 | 16364 | Exome |
| CSB22 | 16376 | Exome |
| CSB23 | 16398 | Exome |
| CSB24 | 16727 | Exome |
| CSB25 | 16754 | Exome |
| CSB26 | 16786 | Exome |
| CSB27 | 16837 | Exome |
| CSB28 | 16846 | Exome |
| CSB29 | 16912 | Exome |
| CSB30 | 16947 | Exome |
| CSB31 | 15462 | Exome |
| CSB32 | 15858 | Exome |
| CSB33 | 16566 | Exome |
| CSB34 | 16847 | Exome |

---

**Supplementary Table 5b: Sample Key for Whole Genome and Exome Capture Samples**

| Hugo_Symbol | Chromosome | Start_position | End_position | Variant_Classification | Variant_Type | Reference_Allele | Variant_Allele | Tumor_Sample_Barcode | transcript_name | amino_acid_change  |
|-------------|------------|----------------|--------------|------------------------|--------------|------------------|----------------|----------------------|-----------------|--------------------|
| PIK3CA      | 3          | 180399623      | 180399628    | In Frame Del           | DEL          | GGCAAC           | 0              | 409                  | NM_006218.2     | p.G106in Frame del |
| PIK3CA      | 3          | 180404243      | 180404243    | Missense Mutation      | SNP          | T                | G              | 829                  | NM_006218.2     | p.V344G            |
| PIK3CA      | 3          | 180404247      | 180404247    | Missense Mutation      | SNP          | T                | A              | 16069                | NM_006218.2     | p.N345K            |
| PIK3CA      | 3          | 180404247      | 180404247    | Missense Mutation      | SNP          | T                | A              | 16140                | NM_006218.2     | p.N345K            |
| PIK3CA      | 3          | 180404260      | 180404260    | Missense Mutation      | SNP          | G                | C              | 808                  | NM_006218.2     | p.D350H            |
| PIK3CA      | 3          | 180410671      | 180410676    | In Frame Del           | DEL          | CACTGT           | 0              | 15867                | NM_006218.2     | p.H419in Frame del |
| PIK3CA      | 3          | 180410674      | 180410674    | Missense Mutation      | SNP          | T                | C              | 309                  | NM_006218.2     | p.C420R            |
| PIK3CA      | 3          | 180410674      | 180410674    | Missense Mutation      | SNP          | T                | C              | 16442                | NM_006218.2     | p.C420R            |
| PIK3CA      | 3          | 180410920      | 180410920    | Missense Mutation      | SNP          | C                | T              | 15694                | NM_006218.2     | p.P471L            |
| PIK3CA      | 3          | 180418776      | 180418776    | Missense Mutation      | SNP          | G                | A              | 15654                | NM_006218.2     | p.E542K            |
| PIK3CA      | 3          | 180418776      | 180418776    | Missense Mutation      | SNP          | G                | A              | 15832                | NM_006218.2     | p.E542K            |
| PIK3CA      | 3          | 180418776      | 180418776    | Missense Mutation      | SNP          | G                | A              | 15868                | NM_006218.2     | p.E542K            |
| PIK3CA      | 3          | 180418776      | 180418776    | Missense Mutation      | SNP          | G                | A              | 15870                | NM_006218.2     | p.E542K            |
| PIK3CA      | 3          | 180418785      | 180418785    | Missense Mutation      | SNP          | G                | A              | 115                  | NM_006218.2     | p.E545K            |
| PIK3CA      | 3          | 180418785      | 180418785    | Missense Mutation      | SNP          | G                | A              | 308                  | NM_006218.2     | p.E545K            |
| PIK3CA      | 3          | 180418785      | 180418785    | Missense Mutation      | SNP          | G                | A              | 15510                | NM_006218.2     | p.E545K            |
| PIK3CA      | 3          | 180418785      | 180418785    | Missense Mutation      | SNP          | G                | A              | 15547                | NM_006218.2     | p.E545K            |
| PIK3CA      | 3          | 180418785      | 180418785    | Missense Mutation      | SNP          | G                | A              | 15669                | NM_006218.2     | p.E545K            |
| PIK3CA      | 3          | 180418785      | 180418785    | Missense Mutation      | SNP          | G                | A              | 15776                | NM_006218.2     | p.E545K            |
| PIK3CA      | 3          | 180418785      | 180418785    | Missense Mutation      | SNP          | G                | A              | 15797                | NM_006218.2     | p.E545K            |
| PIK3CA      | 3          | 180418785      | 180418785    | Missense Mutation      | SNP          | G                | A              | 15894                | NM_006218.2     | p.E545K            |
| PIK3CA      | 3          | 180418785      | 180418785    | Missense Mutation      | SNP          | G                | A              | 16025                | NM_006218.2     | p.E545K            |
| PIK3CA      | 3          | 180418786      | 180418786    | Missense Mutation      | SNP          | A                | C              | 122                  | NM_006218.2     | p.E545A            |
| PIK3CA      | 3          | 180418786      | 180418786    | Missense Mutation      | SNP          | A                | G              | 15880                | NM_006218.2     | p.E545G            |
| PIK3CA      | 3          | 180418789      | 180418789    | Missense Mutation      | SNP          | A                | G              | 16402                | NM_006218.2     | p.Q546R            |
| PIK3CA      | 3          | 180434779      | 180434779    | Missense Mutation      | SNP          | A                | T              | 112                  | NM_006218.2     | p.H1047L           |
| PIK3CA      | 3          | 180434779      | 180434779    | Missense Mutation      | SNP          | A                | G              | 117                  | NM_006218.2     | p.H1047R           |
| PIK3CA      | 3          | 180434779      | 180434779    | Missense Mutation      | SNP          | A                | G              | 831                  | NM_006218.2     | p.H1047R           |

|        |    |           |           |                   |       |                     |       |       |                |                     |
|--------|----|-----------|-----------|-------------------|-------|---------------------|-------|-------|----------------|---------------------|
| PIK3CA | 3  | 180434779 | 180434779 | Missense Mutation | SNP   | A                   | G     | 15386 | NM_006218.2    | p.H1047R            |
| PIK3CA | 3  | 180434779 | 180434779 | Missense Mutation | SNP   | A                   | G     | 15694 | NM_006218.2    | p.H1047R            |
| PIK3CA | 3  | 180434779 | 180434779 | Missense Mutation | SNP   | A                   | T     | 15816 | NM_006218.2    | p.H1047L            |
| PIK3CA | 3  | 180434779 | 180434779 | Missense Mutation | SNP   | A                   | G     | 15829 | NM_006218.2    | p.H1047R            |
| PIK3CA | 3  | 180434779 | 180434779 | Missense Mutation | SNP   | A                   | G     | 15977 | NM_006218.2    | p.H1047R            |
| PIK3CA | 3  | 180434779 | 180434779 | Missense Mutation | SNP   | A                   | G     | 15995 | NM_006218.2    | p.H1047R            |
| PIK3CA | 3  | 180434779 | 180434779 | Missense Mutation | SNP   | A                   | G     | 16064 | NM_006218.2    | p.H1047R            |
| PIK3CA | 3  | 180434779 | 180434779 | Missense Mutation | SNP   | A                   | G     | 16099 | NM_006218.2    | p.H1047R            |
| PIK3CA | 3  | 180434779 | 180434779 | Missense Mutation | SNP   | A                   | G     | 16127 | NM_006218.2    | p.H1047R            |
| PIK3CA | 3  | 180434779 | 180434779 | Missense Mutation | SNP   | A                   | G     | 16136 | NM_006218.2    | p.H1047R            |
| PIK3CA | 3  | 180434779 | 180434779 | Missense Mutation | SNP   | A                   | G     | 16411 | NM_006218.2    | p.H1047R            |
| PIK3CA | 3  | 180434779 | 180434779 | Missense Mutation | SNP   | A                   | T     | 16439 | NM_006218.2    | p.H1047L            |
| PIK3CA | 3  | 180434779 | 180434779 | Missense Mutation | SNP   | A                   | G     | 16450 | NM_006218.2    | p.H1047R            |
| PIK3CA | 3  | 180434779 | 180434779 | Missense Mutation | SNP   | A                   | G     | 16495 | NM_006218.2    | p.H1047R            |
| PIK3CA | 3  | 180434779 | 180434779 | Missense Mutation | SNP   | A                   | G     | 16561 | NM_006218.2    | p.H1047R            |
| MAP3K1 | 5  | 56191315  | 56191316  | Frame Shift Ins   | INS   | 0                   | C     | 15894 | NM_005921.1    | p.V218fs            |
| MAP3K1 | 5  | 56191385  | 56191385  | Frame Shift Ins   | INDEL | G                   | TT    | 15694 | NM_005921.1    | p.A240fs            |
| MAP3K1 | 5  | 56196966  | 56196966  | Frame Shift Del   | DEL   | T                   | 0     | 15995 | NM_005921.1    | p.F360fs            |
| MAP3K1 | 5  | 56212767  | 56212771  | Frame Shift Del   | DEL   | TATAG               | 0     | 15510 | NM_005921.1    | p.I761fs            |
| MAP3K1 | 5  | 56212856  | 56212858  | Frame Shift Del   | DEL   | GGT                 | 0     | 16561 | NM_005921.1    | p.R790fs            |
| MAP3K1 | 5  | 56213154  | 56213155  | Frame Shift Ins   | INS   | 0                   | G     | 15770 | NM_005921.1    | p.Y790fs            |
| MAP3K1 | 5  | 56213522  | 56213528  | Frame Shift Del   | INDEL | AAGGATT             | TC    | 15977 | NM_005921.1    | p.K913fs            |
| MAP3K1 | 5  | 56213777  | 56213778  | Frame Shift Ins   | INS   | 0                   | C     | 122   | NM_005921.1    | p.T999fs            |
| MAP3K1 | 5  | 56215219  | 56215219  | Nonsense_Mutation | SNP   | C                   | T     | 15919 | NM_005921.1    | p.Q1259*            |
| MAP3K1 | 5  | 56218969  | 56218980  | In Frame Del      | DEL   | TTTGCTAATTGA        | 0     | 15894 | NM_005921.1    | p.L1375in Frame del |
| MAP3K1 | 5  | 56225250  | 56225250  | Missense Mutation | SNP   | C                   | T     | 16392 | NM_005921.1    | p.R1509C            |
| GATA3  | 10 | 8146064   | 8146064   | Missense Mutation | SNP   | T                   | A     | 115   | NM_001002295.1 | p.M294K             |
| GATA3  | 10 | 8146064   | 8146064   | Missense Mutation | SNP   | T                   | A     | 808   | NM_001002295.1 | p.M294K             |
| GATA3  | 10 | 8155729   | 8155729   | Nonsense_Mutation | SNP   | A                   | T     | 16093 | NM_001002295.1 | p.K358*             |
| GATA3  | 10 | 8155867   | 8155868   | Frame Shift Del   | DEL   | CT                  | 0     | 15830 | NM_001002295.1 | p.L404fs            |
| GATA3  | 10 | 8155881   | 8155882   | Frame Shift Ins   | INS   | 0                   | G     | 15931 | NM_001002295.1 | p.P408fs            |
| GATA3  | 10 | 8155896   | 8155897   | Frame Shift Ins   | INS   | 0                   | C     | 16224 | NM_001002295.1 | p.S413fs            |
| GATA3  | 10 | 8155918   | 8155931   | Frame Shift Del   | DEL   | ACGCCGATGCACCC      | 0     | 15968 | NM_001002295.1 | p.T421fs            |
| GATA3  | 10 | 8155961   | 8155980   | Frame Shift Del   | DEL   | ACCCTCCAGCATGGTCACC | 0     | 818   | NM_001002295.1 | p.H435fs            |
| GATA3  | 10 | 8155973   | 8155974   | Frame Shift Ins   | INS   | 0                   | AGCAT | 15660 | NM_001002295.1 | p.M439fs            |

|        |    |          |          |                   |     |     |   |       |             |                    |
|--------|----|----------|----------|-------------------|-----|-----|---|-------|-------------|--------------------|
| CDKN1B | 12 | 12762165 | 12762165 | Missense Mutation | SNP | C   | T | 16441 | NM_004064.3 | p.T42I             |
| CDKN1B | 12 | 12762441 | 12762441 | Frame Shift Del   | DEL | A   | 0 | 15832 | NM_004064.3 | p.K134fs           |
| CDKN1B | 12 | 12762450 | 12762450 | Frame Shift Del   | DEL | C   | 0 | 839   | NM_004064.3 | p.P137fs           |
| CDKN1B | 12 | 12763025 | 12763025 | Splice Site       | SNP | G   | C | 15832 | NM_004064.3 | e2-1               |
| TP53   | 17 | 7514727  | 7514727  | Missense Mutation | SNP | C   | G | 15386 | NM_000546.4 | p.R342P            |
| TP53   | 17 | 7517580  | 7517580  | Nonsense_Mutation | SNP | G   | A | 16392 | NM_000546.4 | p.Q331*            |
| TP53   | 17 | 7517783  | 7517783  | Nonsense_Mutation | SNP | C   | A | 808   | NM_000546.4 | p.E294*            |
| TP53   | 17 | 7517822  | 7517822  | Missense Mutation | SNP | C   | G | 409   | NM_000546.4 | p.D281H            |
| TP53   | 17 | 7517831  | 7517831  | Missense Mutation | SNP | G   | A | 16002 | NM_000546.4 | p.P278S            |
| TP53   | 17 | 7517845  | 7517845  | Missense Mutation | SNP | C   | T | 16256 | NM_000546.4 | p.R273H            |
| TP53   | 17 | 7517848  | 7517850  | In Frame Del      | DEL | ACC | 0 | 307   | NM_000546.4 | p.V272in Frame del |
| TP53   | 17 | 7518263  | 7518263  | Missense Mutation | SNP | C   | T | 16091 | NM_000546.4 | p.R248Q            |
| TP53   | 17 | 7518960  | 7518960  | Missense Mutation | SNP | T   | A | 15445 | NM_000546.4 | p.Y205F            |
| TP53   | 17 | 7518990  | 7518990  | Missense Mutation | SNP | A   | G | 15868 | NM_000546.4 | p.I195T            |
| TP53   | 17 | 7519000  | 7519000  | Nonsense_Mutation | SNP | G   | A | 16092 | NM_000546.4 | p.Q192*            |
| TP53   | 17 | 7519204  | 7519204  | Missense Mutation | SNP | G   | A | 16539 | NM_000546.4 | p.P151S            |
| TP53   | 17 | 7519233  | 7519233  | Missense Mutation | SNP | C   | T | 122   | NM_000546.4 | p.C141Y            |
| TP53   | 17 | 7519243  | 7519243  | Missense Mutation | SNP | C   | G | 308   | NM_000546.4 | p.A138P            |
| TP53   | 17 | 7519255  | 7519255  | Missense Mutation | SNP | A   | T | 104   | NM_000546.4 | p.F134I            |
| TP53   | 17 | 7519259  | 7519259  | Missense Mutation | SNP | C   | A | 107   | NM_000546.4 | p.K132N            |
| MAP2K4 | 17 | 11925403 | 11925404 | Frame Shift Del   | DEL | GA  | 0 | 16402 | NM_003010.2 | p.R75fs            |
| MAP2K4 | 17 | 11925416 | 11925417 | Splice Site       | DEL | CA  | 0 | 16091 | NM_003010.2 | p.H79fs            |
| MAP2K4 | 17 | 11951875 | 11951875 | Missense Mutation | SNP | A   | G | 16069 | NM_003010.2 | p.D186G            |
| MAP2K4 | 17 | 11951953 | 11951954 | Splice Site       | INS | 0   | T | 111   | NM_003010.2 | e5+2               |
| MAP2K4 | 17 | 11973330 | 11973330 | Splice Site       | SNP | G   | A | 409   | NM_003010.2 | e9+1               |

### Supplementary Table 5c: Tier1 somatic mutations discovered in 3730 sanger sequence data for 108 additional tumor samples



| Hugo_Symbol | Chromosome | Start_position | End_position | Variant_Classification | Variant_Type | Reference_Allele                | Variant_Allele | Tumor_Sample_Barcode | transcript_name | amino_acid_change  |
|-------------|------------|----------------|--------------|------------------------|--------------|---------------------------------|----------------|----------------------|-----------------|--------------------|
| JAK1        | 1          | 65072896       | 65072896     | Missense Mutation      | SNP          | G                               | C              | 17327                | NM_002227.2     | p.F1134L           |
| BIRC6       | 2          | 32580395       | 32580395     | Missense Mutation      | SNP          | C                               | G              | 17143                | NM_016252.3     | p.S3048C           |
| BIRC6       | 2          | 32681641       | 32681641     | Nonsense_Mutation      | SNP          | C                               | G              | 16135                | NM_016252.3     | p.S4686*           |
| ATR         | 3          | 143663594      | 143663594    | Missense Mutation      | SNP          | C                               | G              | 17143                | NM_001184.3     | p.R2357T           |
| ATR         | 3          | 143671069      | 143671069    | Missense Mutation      | SNP          | C                               | G              | 17818                | NM_001184.3     | p.D2118H           |
| ATR         | 3          | 143698669      | 143698669    | Missense Mutation      | SNP          | G                               | T              | 16993                | NM_001184.3     | p.P1872T           |
| ATR         | 3          | 143754897      | 143754897    | Silent Mutation        | SNP          | G                               | C              | 17818                | NM_001184.3     | p.L889             |
| PIK3CA      | 3          | 180404247      | 180404247    | Missense Mutation      | SNP          | T                               | A              | 16965                | NM_006218.2     | p.N345K            |
| PIK3CA      | 3          | 180404247      | 180404247    | Missense Mutation      | SNP          | T                               | A              | 17331                | NM_006218.2     | p.N345K            |
| PIK3CA      | 3          | 180404247      | 180404247    | Missense Mutation      | SNP          | T                               | A              | 18155                | NM_006218.2     | p.N345K            |
| PIK3CA      | 3          | 180410668      | 180410668    | Missense Mutation      | SNP          | G                               | A              | 17327                | NM_006218.2     | p.E418K            |
| PIK3CA      | 3          | 180410668      | 180410668    | Missense Mutation      | SNP          | G                               | A              | 17611                | NM_006218.2     | p.E418K            |
| PIK3CA      | 3          | 180410674      | 180410674    | Missense Mutation      | SNP          | T                               | C              | 17612                | NM_006218.2     | p.C420R            |
| PIK3CA      | 3          | 180410761      | 180410787    | In Frame Del           | DEL          | CCTCATGGATTAGAAGATT<br>TGCTGAAC | 0              | 15921                | NM_006218.2     | p.H450in_frame_del |
| PIK3CA      | 3          | 180410772      | 180410774    | In Frame Del           | DEL          | AGA                             | 0              | 17678                | NM_006218.2     | p.E453in_frame_del |
| PIK3CA      | 3          | 180418776      | 180418776    | Missense Mutation      | SNP          | G                               | A              | 16598                | NM_006218.2     | p.E542K            |
| PIK3CA      | 3          | 180418776      | 180418776    | Missense Mutation      | SNP          | G                               | C              | 17327                | NM_006218.2     | p.E542Q            |
| PIK3CA      | 3          | 180418776      | 180418776    | Missense Mutation      | SNP          | G                               | A              | 17467                | NM_006218.2     | p.E542K            |
| PIK3CA      | 3          | 180418776      | 180418776    | Missense Mutation      | SNP          | G                               | A              | 17494                | NM_006218.2     | p.E542K            |
| PIK3CA      | 3          | 180418785      | 180418785    | Missense Mutation      | SNP          | G                               | A              | 15721                | NM_006218.2     | p.E545K            |
| PIK3CA      | 3          | 180418785      | 180418785    | Missense Mutation      | SNP          | G                               | A              | 16135                | NM_006218.2     | p.E545K            |
| PIK3CA      | 3          | 180418785      | 180418785    | Missense Mutation      | SNP          | G                               | A              | 16189                | NM_006218.2     | p.E545K            |
| PIK3CA      | 3          | 180418785      | 180418785    | Missense Mutation      | SNP          | G                               | A              | 16590                | NM_006218.2     | p.E545K            |

|        |   |           |           |                   |     |   |   |       |             |          |
|--------|---|-----------|-----------|-------------------|-----|---|---|-------|-------------|----------|
| PIK3CA | 3 | 180418785 | 180418785 | Missense Mutation | SNP | G | A | 17138 | NM_006218.2 | p.E545K  |
| PIK3CA | 3 | 180418785 | 180418785 | Missense Mutation | SNP | G | A | 17143 | NM_006218.2 | p.E545K  |
| PIK3CA | 3 | 180418785 | 180418785 | Missense Mutation | SNP | G | A | 17175 | NM_006218.2 | p.E545K  |
| PIK3CA | 3 | 180418785 | 180418785 | Missense Mutation | SNP | G | A | 17384 | NM_006218.2 | p.E545K  |
| PIK3CA | 3 | 180418785 | 180418785 | Missense Mutation | SNP | G | A | 17518 | NM_006218.2 | p.E545K  |
| PIK3CA | 3 | 180418785 | 180418785 | Missense Mutation | SNP | G | C | 17611 | NM_006218.2 | p.E545Q  |
| PIK3CA | 3 | 180418785 | 180418785 | Missense Mutation | SNP | G | A | 17860 | NM_006218.2 | p.E545K  |
| PIK3CA | 3 | 180418785 | 180418785 | Missense Mutation | SNP | G | A | 18156 | NM_006218.2 | p.E545K  |
| PIK3CA | 3 | 180418785 | 180418785 | Missense Mutation | SNP | G | A | 21009 | NM_006218.2 | p.E545K  |
| PIK3CA | 3 | 180418786 | 180418786 | Missense Mutation | SNP | A | G | 17445 | NM_006218.2 | p.E545G  |
| PIK3CA | 3 | 180420104 | 180420104 | Missense Mutation | SNP | G | A | 16063 | NM_006218.2 | p.E600K  |
| PIK3CA | 3 | 180434712 | 180434712 | Missense Mutation | SNP | A | G | 17612 | NM_006218.2 | p.T1025A |
| PIK3CA | 3 | 180434778 | 180434778 | Missense Mutation | SNP | C | A | 17835 | NM_006218.2 | p.H1047N |
| PIK3CA | 3 | 180434779 | 180434779 | Missense Mutation | SNP | A | G | 402   | NM_006218.2 | p.H1047R |
| PIK3CA | 3 | 180434779 | 180434779 | Missense Mutation | SNP | A | G | 15571 | NM_006218.2 | p.H1047R |
| PIK3CA | 3 | 180434779 | 180434779 | Missense Mutation | SNP | A | G | 15750 | NM_006218.2 | p.H1047R |
| PIK3CA | 3 | 180434779 | 180434779 | Missense Mutation | SNP | A | G | 15812 | NM_006218.2 | p.H1047R |
| PIK3CA | 3 | 180434779 | 180434779 | Missense Mutation | SNP | A | G | 15906 | NM_006218.2 | p.H1047R |
| PIK3CA | 3 | 180434779 | 180434779 | Missense Mutation | SNP | A | G | 16063 | NM_006218.2 | p.H1047R |
| PIK3CA | 3 | 180434779 | 180434779 | Missense Mutation | SNP | A | G | 16082 | NM_006218.2 | p.H1047R |
| PIK3CA | 3 | 180434779 | 180434779 | Missense Mutation | SNP | A | G | 16185 | NM_006218.2 | p.H1047R |
| PIK3CA | 3 | 180434779 | 180434779 | Missense Mutation | SNP | A | G | 16342 | NM_006218.2 | p.H1047R |
| PIK3CA | 3 | 180434779 | 180434779 | Missense Mutation | SNP | A | G | 16751 | NM_006218.2 | p.H1047R |
| PIK3CA | 3 | 180434779 | 180434779 | Missense Mutation | SNP | A | G | 16757 | NM_006218.2 | p.H1047R |
| PIK3CA | 3 | 180434779 | 180434779 | Missense Mutation | SNP | A | G | 16779 | NM_006218.2 | p.H1047R |
| PIK3CA | 3 | 180434779 | 180434779 | Missense Mutation | SNP | A | G | 16895 | NM_006218.2 | p.H1047R |
| PIK3CA | 3 | 180434779 | 180434779 | Missense Mutation | SNP | A | G | 16956 | NM_006218.2 | p.H1047R |
| PIK3CA | 3 | 180434779 | 180434779 | Missense Mutation | SNP | A | G | 16992 | NM_006218.2 | p.H1047R |
| PIK3CA | 3 | 180434779 | 180434779 | Missense Mutation | SNP | A | G | 16998 | NM_006218.2 | p.H1047R |
| PIK3CA | 3 | 180434779 | 180434779 | Missense Mutation | SNP | A | T | 17070 | NM_006218.2 | p.H1047L |
| PIK3CA | 3 | 180434779 | 180434779 | Missense Mutation | SNP | A | T | 17327 | NM_006218.2 | p.H1047L |
| PIK3CA | 3 | 180434779 | 180434779 | Missense Mutation | SNP | A | G | 17328 | NM_006218.2 | p.H1047R |

|        |   |           |           |                   |     |                                                   |   |       |             |                    |
|--------|---|-----------|-----------|-------------------|-----|---------------------------------------------------|---|-------|-------------|--------------------|
| PIK3CA | 3 | 180434779 | 180434779 | Missense Mutation | SNP | A                                                 | T | 17407 | NM_006218.2 | p.H1047L           |
| PIK3CA | 3 | 180434779 | 180434779 | Missense Mutation | SNP | A                                                 | T | 17636 | NM_006218.2 | p.H1047L           |
| PIK3CA | 3 | 180434779 | 180434779 | Missense Mutation | SNP | A                                                 | G | 17678 | NM_006218.2 | p.H1047R           |
| PIK3CA | 3 | 180434779 | 180434779 | Missense Mutation | SNP | A                                                 | G | 17688 | NM_006218.2 | p.H1047R           |
| PIK3CA | 3 | 180434779 | 180434779 | Missense Mutation | SNP | A                                                 | G | 17818 | NM_006218.2 | p.H1047R           |
| PIK3CA | 3 | 180434779 | 180434779 | Missense Mutation | SNP | A                                                 | T | 17835 | NM_006218.2 | p.H1047L           |
| PIK3CA | 3 | 180434779 | 180434779 | Missense Mutation | SNP | A                                                 | G | 17902 | NM_006218.2 | p.H1047R           |
| PIK3CA | 3 | 180434779 | 180434779 | Missense Mutation | SNP | A                                                 | G | 17915 | NM_006218.2 | p.H1047R           |
| PIK3CA | 3 | 180434779 | 180434779 | Missense Mutation | SNP | A                                                 | G | 17946 | NM_006218.2 | p.H1047R           |
| PIK3CA | 3 | 180434779 | 180434779 | Missense Mutation | SNP | A                                                 | G | 18183 | NM_006218.2 | p.H1047R           |
| PIK3CA | 3 | 180434784 | 180434784 | Missense Mutation | SNP | G                                                 | C | 17384 | NM_006218.2 | p.G1049R           |
| PIK3CA | 3 | 180434835 | 180434835 | Missense Mutation | SNP | G                                                 | T | 17518 | NM_006218.2 | p.A1066S           |
| PIK3CA | 3 | 180434836 | 180434836 | Missense Mutation | SNP | C                                                 | T | 17518 | NM_006218.2 | p.A1066V           |
| PIK3CA | 3 | 180434840 | 180434841 | Frame Shift Ins   | INS | 0                                                 | A | 16959 | NM_006218.2 | p.N1067fs          |
| PDGFRA | 4 | 54838417  | 54838418  | Splice_Site       | INS | 0                                                 | T | 16825 | NM_006206.4 | e12+1              |
| KIT    | 4 | 55256514  | 55256514  | Silent            | SNP | C                                                 | T | 17774 | NM_000222.2 | p.R49              |
| MAP3K1 | 5 | 56191482  | 56191483  | Frame Shift Del   | DEL | AG                                                | 0 | 18183 | NM_005921.1 | p.R273fs           |
| MAP3K1 | 5 | 56196358  | 56196358  | Nonsense_Mutation | SNP | C                                                 | G | 17612 | NM_005921.1 | p.S292*            |
| MAP3K1 | 5 | 56196461  | 56196461  | Frame Shift Del   | DEL | T                                                 | 0 | 17646 | NM_005921.1 | p.F327fs           |
| MAP3K1 | 5 | 56196987  | 56196987  | Nonsense_Mutation | SNP | C                                                 | T | 17818 | NM_005921.1 | p.Q367*            |
| MAP3K1 | 5 | 56197474  | 56197475  | Frame Shift Ins   | INS | 0                                                 | T | 18161 | NM_005921.1 | p.N406fs           |
| MAP3K1 | 5 | 56203484  | 56203500  | Frame Shift Del   | DEL | TTTTCTATAGCATAAAG                                 | 0 | 17774 | NM_005921.1 | p.S438fs           |
| MAP3K1 | 5 | 56203522  | 56203522  | Frame Shift Del   | DEL | C                                                 | 0 | 17611 | NM_005921.1 | p.P444fs           |
| MAP3K1 | 5 | 56204524  | 56204527  | Frame Shift Del   | DEL | CTTA                                              | 0 | 15906 | NM_005921.1 | p.T542fs           |
| MAP3K1 | 5 | 56206812  | 56206812  | Nonsense_Mutation | SNP | C                                                 | G | 16063 | NM_005921.1 | p.S628*            |
| MAP3K1 | 5 | 56212323  | 56212324  | Frame Shift Ins   | INS | 0                                                 | T | 21009 | NM_005921.1 | p.L707fs           |
| MAP3K1 | 5 | 56213440  | 56213440  | Nonsense_Mutation | SNP | C                                                 | T | 15921 | NM_005921.1 | p.Q886*            |
| MAP3K1 | 5 | 56213600  | 56213641  | In Frame Del      | DEL | CTAGTTCAACAACAACAAAC<br>AACAAACAACAGAGCAA<br>CCAA | 0 | 17586 | NM_005921.1 | p.S939in_frame_del |
| MAP3K1 | 5 | 56213749  | 56213750  | Frame Shift Del   | DEL | TC                                                | 0 | 17612 | NM_005921.1 | p.S989fs           |
| MAP3K1 | 5 | 56213789  | 56213790  | Frame Shift Ins   | INS | 0                                                 | T | 17868 | NM_005921.1 | p.K1003fs          |
| MAP3K1 | 5 | 56213845  | 56213846  | Frame Shift Del   | DEL | AC                                                | 0 | 16082 | NM_005921.1 | p.Q1022fs          |
| MAP3K1 | 5 | 56213884  | 56213884  | Missense Mutation | SNP | C                                                 | T | 17327 | NM_005921.1 | p.P1034S           |
| MAP3K1 | 5 | 56215245  | 56215245  | Frame Shift Del   | DEL | T                                                 | 0 | 17868 | NM_005921.1 | p.T1267fs          |

|        |    |           |           |                   |     |                                |    |       |                |                     |
|--------|----|-----------|-----------|-------------------|-----|--------------------------------|----|-------|----------------|---------------------|
| MAP3K1 | 5  | 56216254  | 56216255  | Frame Shift Ins   | INS | 0                              | A  | 17733 | NM_005921.1    | p.Y1276fs           |
| MAP3K1 | 5  | 56216311  | 56216312  | Frame Shift Del   | DEL | AT                             | 0  | 17902 | NM_005921.1    | p.I1295fs           |
| MAP3K1 | 5  | 56216341  | 56216341  | Missense Mutation | SNP | A                              | G  | 18161 | NM_005921.1    | p.N1305D            |
| MAP3K1 | 5  | 56216343  | 56216345  | In Frame Del      | DEL | CAT                            | 0  | 16082 | NM_005921.1    | p.I1307in_frame_del |
| MAP3K1 | 5  | 56216383  | 56216384  | Frame Shift Ins   | INS | 0                              | A  | 17352 | NM_005921.1    | p.Y1319fs           |
| MAP3K1 | 5  | 56216394  | 56216394  | Silent            | SNP | C                              | T  | 17818 | NM_005921.1    | p.F1322             |
| MAP3K1 | 5  | 56217589  | 56217590  | Frame Shift Ins   | INS | 0                              | T  | 17733 | NM_005921.1    | p.L1352fs           |
| MAP3K1 | 5  | 56217626  | 56217628  | In Frame Del      | DEL | ATC                            | 0  | 17611 | NM_005921.1    | p.I1366in_frame_del |
| MAP3K1 | 5  | 56219034  | 56219034  | Missense Mutation | SNP | C                              | T  | 17636 | NM_005921.1    | p.A1396V            |
| MAP3K1 | 5  | 56219091  | 56219091  | Missense Mutation | SNP | T                              | G  | 15906 | NM_005921.1    | p.F1415C            |
| MAP3K1 | 5  | 56225135  | 56225136  | Frame Shift Ins   | INS | 0                              | C  | 15750 | NM_005921.1    | p.S1471fs           |
| MAP3K1 | 5  | 56225199  | 56225199  | Nonsense_Mutation | SNP | C                              | T  | 18183 | NM_005921.1    | p.Q1492*            |
| CSF1R  | 5  | 149415024 | 149415024 | Missense Mutation | SNP | T                              | G  | 17066 | NM_005211.3    | p.M875L             |
| CSF1R  | 5  | 149430277 | 149430277 | Missense Mutation | SNP | C                              | T  | 16751 | NM_005211.3    | p.R378H             |
| CSF1R  | 5  | 149439975 | 149439975 | Missense Mutation | SNP | C                              | T  | 17881 | NM_005211.3    | p.R142H             |
| DDR1   | 6  | 30972583  | 30972583  | Missense Mutation | SNP | C                              | T  | 17733 | NM_013994.4    | p.R611C             |
| MET    | 7  | 116196941 | 116196941 | Missense Mutation | SNP | G                              | A  | 17818 | NM_000245.2    | p.D864N             |
| MET    | 7  | 116222969 | 116222969 | Nonsense_Mutation | SNP | G                              | T  | 16744 | NM_000245.2    | p.E1275*            |
| GATA3  | 10 | 8140733   | 8140734   | Frame Shift Ins   | INS | 0                              | C  | 17746 | NM_001002295.1 | p.S237fs            |
| GATA3  | 10 | 8151439   | 8151440   | Splice_Site       | DEL | CA                             | 0  | 17383 | NM_001002295.1 | e4-2                |
| GATA3  | 10 | 8151439   | 8151440   | Splice_Site       | DEL | CA                             | 0  | 17733 | NM_001002295.1 | e4-2                |
| GATA3  | 10 | 8151483   | 8151483   | Frame Shift Del   | DEL | G                              | 0  | 16185 | NM_001002295.1 | p.T323fs            |
| GATA3  | 10 | 8151508   | 8151515   | Frame Shift Del   | DEL | AGGAATGC                       | 0  | 16934 | NM_001002295.1 | p.R331fs            |
| GATA3  | 10 | 8151552   | 8151553   | Frame Shift Ins   | INS | 0                              | T  | 21009 | NM_001002295.1 | p.Y345fs            |
| GATA3  | 10 | 8155721   | 8155721   | Frame Shift Del   | DEL | T                              | 0  | 16702 | NM_001002295.1 | p.L355fs            |
| GATA3  | 10 | 8155724   | 8155725   | Frame Shift Ins   | INS | 0                              | TA | 17467 | NM_001002295.1 | p.M357fs            |
| GATA3  | 10 | 8155733   | 8155734   | Frame Shift Ins   | INS | 0                              | G  | 17278 | NM_001002295.1 | p.E360fs            |
| GATA3  | 10 | 8155750   | 8155750   | Missense Mutation | SNP | A                              | G  | 17409 | NM_001002295.1 | p.R365G             |
| GATA3  | 10 | 8155785   | 8155786   | Frame Shift Ins   | INS | 0                              | A  | 17123 | NM_001002295.1 | p.V378fs            |
| GATA3  | 10 | 8155880   | 8155881   | Frame Shift Ins   | INS | 0                              | G  | 16208 | NM_001002295.1 | p.P409fs            |
| GATA3  | 10 | 8155985   | 8155986   | Frame Shift Ins   | INS | 0                              | G  | 16993 | NM_001002295.1 | p.*445fs            |
| MALAT1 | 11 | 65022759  | 65022759  | RNA               | SNP | G                              | T  | 16965 | NR_002819.2    | NULL                |
| MALAT1 | 11 | 65024847  | 65024871  | RNA               | DEL | TGGAACCTTACTTATGGTAA<br>CCTTTT | 0  | 16189 | NR_002819.2    | NULL                |
| MALAT1 | 11 | 65025184  | 65025184  | RNA               | SNP | G                              | C  | 17066 | NR_002819.2    | NULL                |

|        |    |          |          |                   |     |             |      |       |             |                    |
|--------|----|----------|----------|-------------------|-----|-------------|------|-------|-------------|--------------------|
| MALAT1 | 11 | 65025189 | 65025189 | RNA               | SNP | C           | A    | 16992 | NR_002819.2 | NULL               |
| MALAT1 | 11 | 65026184 | 65026184 | RNA               | SNP | C           | G    | 17818 | NR_002819.2 | NULL               |
| CDKN1B | 12 | 12762251 | 12762251 | Nonsense_Mutation | SNP | G           | T    | 17407 | NM_004064.3 | p.E71*             |
| CDKN1B | 12 | 12763061 | 12763061 | Nonsense_Mutation | SNP | G           | T    | 17143 | NM_004064.3 | p.E171*            |
| CDKN1B | 12 | 12763142 | 12763142 | Missense Mutation | SNP | A           | G    | 18183 | NM_004064.3 | p.T198A            |
| RB1    | 13 | 47814767 | 47814767 | Nonsense_Mutation | SNP | G           | A    | 17250 | NM_000321.2 | p.W99*             |
| RB1    | 13 | 47839649 | 47839649 | Nonsense_Mutation | SNP | C           | T    | 16135 | NM_000321.2 | p.R320*            |
| RB1    | 13 | 47948867 | 47948867 | Silent Mutation   | SNP | G           | A    | 16993 | NM_000321.2 | p.Q850             |
| LTK    | 15 | 39586746 | 39586746 | Missense Mutation | SNP | C           | T    | 16189 | NM_002344.1 | p.M460I            |
| LTK    | 15 | 39587613 | 39587613 | Missense Mutation | SNP | C           | T    | 16189 | NM_002344.1 | p.E399K            |
| CDH1   | 16 | 67329731 | 67329731 | Frame Shift Del   | DEL | C           | 0    | 16590 | NM_004360.3 | p.C28fs            |
| CDH1   | 16 | 67329816 | 67329817 | Splice_Site       | INS | 0           | T    | 16957 | NM_004360.3 | e2+1               |
| CDH1   | 16 | 67393198 | 67393198 | Frame Shift Del   | DEL | C           | 0    | 18154 | NM_004360.3 | p.I96fs            |
| CDH1   | 16 | 67399915 | 67399915 | Frame Shift Del   | DEL | C           | 0    | 17738 | NM_004360.3 | p.P159fs           |
| CDH1   | 16 | 67400190 | 67400191 | Frame Shift Del   | DEL | AG          | 0    | 18156 | NM_004360.3 | p.R209fs           |
| CDH1   | 16 | 67401662 | 67401663 | In Frame Ins      | INS | 0           | CAC  | 18161 | NM_004360.3 | p.T251in_frame_ins |
| CDH1   | 16 | 67401704 | 67401714 | Frame Shift Del   | DEL | AGGAGGTCTTT | 0    | 17740 | NM_004360.3 | p.Q264fs           |
| CDH1   | 16 | 67403111 | 67403119 | In Frame Del      | DEL | GCCACAGAC   | 0    | 17208 | NM_004360.3 | p.T287in_frame_del |
| CDH1   | 16 | 67403556 | 67403558 | Frame Shift Del   | DEL | CT          | 0    | 18091 | NM_004360.3 | p.L343fs           |
| CDH1   | 16 | 67404720 | 67404720 | Nonsense_Mutation | SNP | A           | T    | 16959 | NM_004360.3 | p.K381*            |
| CDH1   | 16 | 67404846 | 67404846 | Frame Shift Del   | DEL | T           | 0    | 826   | NM_004360.3 | p.F423fs           |
| CDH1   | 16 | 67407070 | 67407071 | Frame Shift Del   | DEL | AG          | 0    | 17352 | NM_004360.3 | p.R492fs           |
| CDH1   | 16 | 67410685 | 67410686 | Frame Shift Ins   | INS | 0           | A    | 17946 | NM_004360.3 | p.Y523fs           |
| CDH1   | 16 | 67413528 | 67413529 | Frame Shift Ins   | INS | 0           | A    | 17233 | NM_004360.3 | p.N613fs           |
| CDH1   | 16 | 67413556 | 67413557 | Frame Shift Ins   | INS | 0           | AATA | 17972 | NM_004360.3 | p.T622fs           |
| CDH1   | 16 | 67414852 | 67414853 | Frame Shift Del   | DEL | CT          | 0    | 15721 | NM_004360.3 | p.D662fs           |
| CDH1   | 16 | 67414855 | 67414861 | Frame Shift Del   | DEL | CAAATC      | 0    | 15721 | NM_004360.3 | p.Y663fs           |
| CDH1   | 16 | 67414856 | 67414856 | Frame Shift Del   | DEL | A           | 0    | 15812 | NM_004360.3 | p.I665fs           |
| CDH1   | 16 | 67414993 | 67415000 | Frame Shift Del   | DEL | CATTCTGG    | 0    | 17929 | NM_004360.3 | p.I710fs           |
| CDH1   | 16 | 67419577 | 67419577 | Splice_Site       | SNP | G           | T    | 17494 | NM_004360.3 | e14-1              |
| CDH1   | 16 | 67419675 | 67419675 | Frame Shift Del   | DEL | C           | 0    | 17327 | NM_004360.3 | p.Y755fs           |
| CDH1   | 16 | 67421155 | 67421156 | Frame Shift Del   | DEL | TT          | 0    | 16313 | NM_004360.3 | p.L798fs           |
| CDH1   | 16 | 67421203 | 67421203 | Splice_Site       | SNP | T           | G    | 16296 | NM_004360.3 | e15+2              |
| TP53   | 17 | 7514719  | 7514720  | Frame Shift Del   | DEL | TC          | 0    | 826   | NM_000546.4 | p.N345fs           |

|        |    |          |          |                   |     |                                        |     |       |             |                    |
|--------|----|----------|----------|-------------------|-----|----------------------------------------|-----|-------|-------------|--------------------|
| TP53   | 17 | 7517830  | 7517830  | Missense Mutation | SNP | G                                      | A   | 16135 | NM_000546.4 | p.P278L            |
| TP53   | 17 | 7517845  | 7517845  | Missense Mutation | SNP | C                                      | T   | 17157 | NM_000546.4 | p.R273H            |
| TP53   | 17 | 7517845  | 7517845  | Missense Mutation | SNP | C                                      | T   | 17328 | NM_000546.4 | p.R273H            |
| TP53   | 17 | 7517845  | 7517845  | Missense Mutation | SNP | C                                      | T   | 17445 | NM_000546.4 | p.R273H            |
| TP53   | 17 | 7517846  | 7517846  | Missense Mutation | SNP | G                                      | A   | 16040 | NM_000546.4 | p.R273C            |
| TP53   | 17 | 7518259  | 7518259  | Missense Mutation | SNP | C                                      | A   | 17688 | NM_000546.4 | p.R249S            |
| TP53   | 17 | 7518263  | 7518263  | Missense Mutation | SNP | C                                      | T   | 17175 | NM_000546.4 | p.R248Q            |
| TP53   | 17 | 7518264  | 7518264  | Missense Mutation | SNP | G                                      | A   | 17746 | NM_000546.4 | p.R248W            |
| TP53   | 17 | 7518293  | 7518293  | Missense Mutation | SNP | C                                      | A   | 17774 | NM_000546.4 | p.C238F            |
| TP53   | 17 | 7518299  | 7518299  | Missense Mutation | SNP | T                                      | C   | 18025 | NM_000546.4 | p.Y236C            |
| TP53   | 17 | 7518920  | 7518922  | In Frame Del      | DEL | CAC                                    | 0   | 16982 | NM_000546.4 | p.V218in_frame_del |
| TP53   | 17 | 7518930  | 7518930  | Missense Mutation | SNP | C                                      | A   | 17331 | NM_000546.4 | p.S215I            |
| TP53   | 17 | 7518936  | 7518936  | Missense Mutation | SNP | C                                      | T   | 17278 | NM_000546.4 | p.R213Q            |
| TP53   | 17 | 7519171  | 7519171  | Missense Mutation | SNP | T                                      | A   | 15616 | NM_000546.4 | p.I162F            |
| TP53   | 17 | 7519252  | 7519285  | Frame Shift Del   | DEL | AAAACATCTTGTTGAGGGC<br>AGGGGAGTACTGTAG | 0   | 18091 | NM_000546.4 | p.Y126fs           |
| TP53   | 17 | 7519262  | 7519272  | Frame Shift Del   | DEL | GTTGAGGGCAG                            | 0   | 18182 | NM_000546.4 | p.P128fs           |
| TP53   | 17 | 7519272  | 7519274  | In Frame Del      | DEL | GGG                                    | 0   | 17521 | NM_000546.4 | p.P128in_frame_del |
| TP53   | 17 | 7520087  | 7520088  | In Frame Ins      | INS | 0                                      | ACC | 16744 | NM_000546.4 | p.108in_frame_insG |
| TP53   | 17 | 7520094  | 7520094  | Missense Mutation | SNP | G                                      | C   | 17739 | NM_000546.4 | p.S106R            |
| TP53   | 17 | 7520627  | 7520627  | Missense Mutation | SNP | G                                      | A   | 15866 | NM_000546.4 | p.P4L              |
| MAP2K4 | 17 | 11939623 | 11939623 | Missense Mutation | SNP | C                                      | T   | 17250 | NM_003010.2 | p.R134W            |
| MAP2K4 | 17 | 11957402 | 11957405 | Frame Shift Del   | DEL | AGTA                                   | 0   | 16825 | NM_003010.2 | p.P272fs           |
| MAP2K4 | 17 | 11973180 | 11973180 | Splice_Site       | SNP | G                                      | C   | 15616 | NM_003010.2 | e9-1               |
| ERBB2  | 17 | 35133745 | 35133759 | In Frame Del      | DEL | TTGAGGGAAAACACA                        | 0   | 16757 | NM_004448.1 | p.L755in_frame_del |
| RUNX1  | 21 | 35128627 | 35128628 | Frame Shift Ins   | INS | 0                                      | A   | 17612 | NM_001754.2 | p.S252fs           |
| RUNX1  | 21 | 35153652 | 35153652 | Missense Mutation | SNP | C                                      | T   | 16590 | NM_001754.2 | p.R201Q            |
| RUNX1  | 21 | 35174726 | 35174726 | Missense Mutation | SNP | C                                      | T   | 18155 | NM_001754.2 | p.R169K            |
| RUNX1  | 21 | 35174845 | 35174846 | Frame Shift Ins   | INS | 0                                      | A   | 16189 | NM_001754.2 | p.V130fs           |

### Supplementary Table 5d: Tier1 somatic mutations discovered in custom capture Illumina sequence data for 132 additional tumor samples independent of exome sequencing

| Gene            | SNVs | Indels | P-value FCPT | P-value LRT | P-value CT  | FDR FCPT | FDR LRT  | FDR CT   |
|-----------------|------|--------|--------------|-------------|-------------|----------|----------|----------|
| MAP3K1          | 5    | 8      | 0            | 0           | 0           | 0        | 0        | 0        |
| PIK3CA          | 44   | 1      | 0            | 0           | 0           | 0        | 0        | 0        |
| TP53            | 15   | 1      | 0            | 0           | 0           | 0        | 0        | 0        |
| GATA3           | 2    | 6      | 3.62E-14     | 0           | 1.15E-19    | 2.34E-10 | 0        | 7.41E-16 |
| CDH1            | 3    | 5      | 1.32E-10     | 5.55E-16    | 3.07E-15    | 6.79E-07 | 2.87E-12 | 1.59E-11 |
| TBX3            | 0    | 3      | 0.002663729  | 3.25E-08    | 2.58E-06    | 1        | 0.00012  | 0.011115 |
| ATR             | 6    | 0      | 0.001511863  | 1.60E-08    | 3.73E-06    | 1        | 6.87E-05 | 0.013741 |
| RUNX1           | 4    | 0      | 0.007022425  | 2.79E-05    | 6.59E-06    | 1        | 0.07198  | 0.021257 |
| ENSG00000212670 | 2    | 0      | 0.042852637  | 3.97E-05    | 2.31E-05    | 1        | 0.087265 | 0.066198 |
| RB1             | 4    | 0      | 0.015087212  | 8.76E-05    | 2.76E-05    | 1        | 0.125694 | 0.071238 |
| LDLRAP1         | 2    | 0      | 0.036031591  | 2.24E-06    | 4.27E-05    | 1        | 0.007215 | 0.091925 |
| STMN2           | 1    | 1      | 0.048164882  | 4.79E-05    | 4.15E-05    | 1        | 0.092609 | 0.091925 |
| MYH9            | 2    | 2      | 0.017345889  | 8.09E-05    | 8.96E-05    | 1        | 0.122896 | 0.177917 |
| MLL3            | 2    | 3      | 0.014038346  | 5.06E-05    | 0.000103644 | 1        | 0.092609 | 0.191097 |
| CDKN1B          | 1    | 1      | 0.111403112  | 0.000231951 | 0.000139355 | 1        | 0.211547 | 0.239811 |
| AGTR2           | 2    | 0      | 0.096022173  | 1.50E-05    | 0.000171022 | 1        | 0.043064 | 0.256179 |
| SF3B1           | 3    | 0      | 0.048688866  | 5.48E-05    | 0.00017864  | 1        | 0.092609 | 0.256179 |
| CBFB            | 2    | 0      | 0.09098287   | 0.000158638 | 0.000170409 | 1        | 0.204244 | 0.256179 |

**Supplementary Table 6: Significantly Mutated Genes.**

Shown are the top 18 SMGs based on an FDR cutoff of 0.26. ENSG00000212670 is not annotated by Refseq.

| Slicing Window | Tier 1 |           |           |                |                 |        |         |     | Tier 2 and 3 |           |                |                 | Tier 1, 2, and 3 |        |          |     |           |           |                |                 |        |        |        |          |
|----------------|--------|-----------|-----------|----------------|-----------------|--------|---------|-----|--------------|-----------|----------------|-----------------|------------------|--------|----------|-----|-----------|-----------|----------------|-----------------|--------|--------|--------|----------|
|                | Chr    | Start     | Stop      | Total Mutation | Mutated Samples | Tier 1 | Gene    | Chr | Start        | Stop      | Total Mutation | Mutated Samples | Tier 2           | Tier 3 | Gene     | Chr | Start     | Stop      | Total Mutation | Mutated Samples | Tier 1 | Tier 2 | Tier 3 | Gene     |
| 1k             | 3      | 180434771 | 180435770 | 16             | 16              | 16     | PIK3CA  | 6   | 142747899    | 142748898 | 6              | 6               | 6                | 0      | GPR126   | 3   | 180434771 | 180435770 | 16             | 16              | 16     | 0      | 0      | PIK3CA   |
| 1k             | 3      | 180418776 | 180419775 | 7              | 7               | 7      | PIK3CA  | 10  | 115501580    | 115502579 | 6              | 5               | 0                | 6      | C10orf81 | 3   | 180418776 | 180419775 | 7              | 7               | 7      | 0      | 0      | PIK3CA   |
| 1k             | 17     | 7518928   | 7519927   | 5              | 5               | 5      | TP53    | 5   | 166900648    | 166901647 | 4              | 4               | 2                | 2      |          | 6   | 142747899 | 142748898 | 6              | 6               | 0      | 6      | 0      | GPR126   |
| 1k             | 17     | 7517810   | 7518809   | 5              | 5               | 5      | TP53    | X   | 55650388     | 55651387  | 3              | 3               | 0                | 3      |          | 17  | 7518928   | 7519927   | 5              | 5               | 5      | 0      | 0      | TP53     |
| 1k             | 5      | 56196978  | 56197977  | 3              | 3               | 3      | MAP3K1  | X   | 42346883     | 42347882  | 3              | 3               | 1                | 2      |          | 17  | 7517810   | 7518809   | 5              | 5               | 5      | 0      | 0      | TP53     |
| 1k             | 3      | 143659257 | 143660256 | 4              | 3               | 4      | ATR     | X   | 146598451    | 146599450 | 3              | 3               | 3                | 0      |          | 10  | 115501580 | 115502579 | 6              | 5               | 0      | 0      | 6      | C10orf81 |
| 1k             | 11     | 65024869  | 65025868  | 3              | 3               | 3      | MALAT1  | X   | 137599916    | 137600915 | 3              | 3               | 0                | 3      | FGF13    | 5   | 166900648 | 166901647 | 4              | 4               | 0      | 2      | 2      |          |
| 1k             | X      | 89064225  | 89065224  | 2              | 2               | 2      | TGIF2LX | X   | 117621913    | 117622912 | 3              | 3               | 0                | 3      | DOCK11   | X   | 55650388  | 55651387  | 3              | 3               | 0      | 0      | 3      |          |
| 1k             | X      | 129629187 | 129630186 | 2              | 2               | 2      | ENOX2   | 9   | 75995775     | 75996774  | 3              | 3               | 0                | 3      |          | X   | 42346883  | 42347882  | 3              | 3               | 0      | 1      | 2      |          |
| 1k             | X      | 115218111 | 115219110 | 2              | 2               | 2      | AGTR2   | 9   | 73224613     | 73225612  | 3              | 3               | 0                | 3      |          | X   | 146598451 | 146599450 | 3              | 3               | 0      | 3      | 0      |          |
| 2k             | 3      | 180434771 | 180436770 | 16             | 16              | 16     | PIK3CA  | 6   | 142747899    | 142749898 | 6              | 6               | 6                | 0      | GPR126   | 3   | 180434771 | 180436770 | 16             | 16              | 16     | 0      | 0      | PIK3CA   |
| 2k             | 17     | 7517810   | 7519809   | 10             | 9               | 10     | TP53    | 10  | 84208063     | 84210062  | 5              | 5               | 1                | 4      | NRG3     | 17  | 7517810   | 7519809   | 10             | 9               | 10     | 0      | 0      | TP53     |
| 2k             | 3      | 180418776 | 180420775 | 7              | 7               | 7      | PIK3CA  | 10  | 115501580    | 115503579 | 6              | 5               | 0                | 6      | C10orf81 | 3   | 180418776 | 180420775 | 7              | 7               | 7      | 0      | 0      | PIK3CA   |
| 2k             | 11     | 65024869  | 65026868  | 4              | 4               | 4      | MALAT1  | X   | 137599916    | 137601915 | 4              | 4               | 1                | 3      | FGF13    | 6   | 142747899 | 142749898 | 6              | 6               | 0      | 6      | 0      | GPR126   |
| 2k             | 5      | 56196978  | 56198977  | 3              | 3               | 3      | MAP3K1  | 9   | 21464508     | 21466507  | 4              | 4               | 0                | 4      |          | 10  | 84208063  | 84210062  | 5              | 5               | 0      | 1      | 4      | NRG3     |
| 2k             | 3      | 143659257 | 143661256 | 4              | 3               | 4      | ATR     | 8   | 66217115     | 66219114  | 4              | 4               | 0                | 4      |          | 10  | 115501580 | 115503579 | 6              | 5               | 0      | 0      | 6      | C10orf81 |
| 2k             | X      | 89064225  | 89066224  | 2              | 2               | 2      | TGIF2LX | 6   | 124532311    | 124534310 | 4              | 4               | 1                | 3      | NKAIN2   | X   | 137599916 | 137601915 | 4              | 4               | 0      | 1      | 3      | FGF13    |
| 2k             | X      | 135257364 | 135259363 | 2              | 2               | 2      | GPR112  | 6   | 104414202    | 104416201 | 4              | 4               | 1                | 3      |          | 9   | 21464508  | 21466507  | 4              | 4               | 0      | 0      | 4      |          |
| 2k             | X      | 129629187 | 129631186 | 2              | 2               | 2      | ENOX2   | 5   | 63199147     | 63201146  | 4              | 4               | 0                | 4      |          | 8   | 66217115  | 66219114  | 4              | 4               | 0      | 0      | 4      |          |
| 2k             | X      | 115218111 | 115220110 | 2              | 2               | 2      | AGTR2   | 3   | 1181390      | 1183389   | 4              | 4               | 2                | 2      | CNTN6    | 6   | 124532311 | 124534310 | 4              | 4               | 0      | 1      | 3      | NKAIN2   |
| 5k             | 3      | 180434771 | 180439770 | 16             | 16              | 16     | PIK3CA  | 6   | 142747899    | 142752898 | 6              | 6               | 6                | 0      | GPR126   | 3   | 180434771 | 180439770 | 16             | 16              | 16     | 0      | 0      | PIK3CA   |
| 5k             | 3      | 180418776 | 180423775 | 9              | 7               | 9      | PIK3CA  | 5   | 166898863    | 166903862 | 6              | 6               | 3                | 3      |          | 3   | 180418776 | 180423775 | 9              | 7               | 9      | 0      | 0      | PIK3CA   |
| 5k             | 17     | 7513676   | 7518675   | 8              | 6               | 8      | TP53    | 10  | 84208063     | 84213062  | 6              | 6               | 1                | 5      | NRG3     | 6   | 142747899 | 142752898 | 6              | 6               | 0      | 6      | 0      | GPR126   |
| 5k             | 17     | 7518928   | 7523927   | 6              | 5               | 6      | TP53    | 6   | 104411200    | 104416199 | 5              | 5               | 1                | 4      |          | 5   | 166898863 | 166903862 | 6              | 6               | 0      | 3      | 3      |          |
| 5k             | 11     | 65024869  | 65029868  | 4              | 4               | 4      | MALAT1  | 20  | 4399019      | 4404018   | 5              | 5               | 1                | 4      |          | 17  | 7518928   | 7523927   | 8              | 6               | 6      | 1      | 1      | TP53     |
| 5k             | 5      | 56196978  | 56201977  | 3              | 3               | 3      | MAP3K1  | 10  | 60058774     | 60063773  | 6              | 5               | 1                | 5      | BICC1    | 17  | 7513676   | 7518675   | 8              | 6               | 8      | 0      | 0      | TP53     |
| 5k             | 3      | 180399618 | 180404617 | 3              | 3               | 3      | PIK3CA  | 10  | 115501580    | 115506579 | 6              | 5               | 0                | 6      | C10orf81 | 10  | 84208063  | 84213062  | 6              | 6               | 0      | 1      | 5      | NRG3     |
| 5k             | 3      | 143659257 | 143664256 | 4              | 3               | 4      | ATR     | X   | 76493249     | 76498248  | 4              | 4               | 2                | 2      |          | 6   | 104411200 | 104416199 | 5              | 5               | 0      | 1      | 4      |          |
| 5k             | 10     | 8151439   | 8156438   | 3              | 3               | 3      | GATA3   | X   | 30650426     | 30655425  | 4              | 4               | 0                | 4      | GK       | 20  | 4399019   | 4404018   | 5              | 5               | 0      | 1      | 4      |          |
| 5k             | X      | 89064225  | 89069224  | 2              | 2               | 2      | TGIF2LX | X   | 28829367     | 28834366  | 4              | 4               | 0                | 4      | IL1RAPL1 | 10  | 60058774  | 60063773  | 6              | 5               | 0      | 1      | 5      | BICC1    |
| 10k            | 3      | 180434771 | 180444770 | 16             | 16              | 16     | PIK3CA  | 6   | 142747899    | 142757898 | 7              | 7               | 6                | 1      | GPR126   | 3   | 180434771 | 180444770 | 16             | 16              | 16     | 0      | 0      | PIK3CA   |



|     |    |           |           |    |    |    |        |    |           |           |   |   |   |   |          |           |           |           |    |    |   |   |        |         |
|-----|----|-----------|-----------|----|----|----|--------|----|-----------|-----------|---|---|---|---|----------|-----------|-----------|-----------|----|----|---|---|--------|---------|
| 10k | 17 | 7513676   | 7523675   | 14 | 10 | 14 | TP53   | 5  | 166893737 | 166903736 | 7 | 7 | 3 | 4 | 17       | 7513676   | 7523675   | 16        | 10 | 14 | 1 | 1 | TP53   |         |
| 10k | 3  | 180410761 | 180420760 | 9  | 9  | 9  | PIK3CA | 1  | 164518422 | 164528421 | 7 | 7 | 0 | 7 | 3        | 180410761 | 180420760 | 9         | 9  | 9  | 0 | 0 | PIK3CA |         |
| 10k | 11 | 65024869  | 65034868  | 4  | 4  | 4  | MALAT1 | 9  | 75988641  | 75998640  | 6 | 6 | 1 | 5 | 6        | 142747899 | 142757898 | 7         | 7  | 0  | 6 | 1 | GPR126 |         |
| 10k | 10 | 8146064   | 8156063   | 4  | 4  | 4  | GATA3  | 20 | 59509086  | 59519085  | 6 | 6 | 1 | 5 | CDH4     | 5         | 166893737 | 166903736 | 7  | 7  | 0 | 3 | 4      |         |
| 10k | 5  | 56215247  | 56225246  | 3  | 3  | 3  | MAP3K1 | 11 | 127867351 | 127877350 | 6 | 6 | 2 | 4 | ETS1     | 1         | 164518422 | 164528421 | 7  | 7  | 0 | 0 | 7      |         |
| 10k | 5  | 56196978  | 56206977  | 3  | 3  | 3  | MAP3K1 | 10 | 84208063  | 84218062  | 6 | 6 | 1 | 5 | NRG3     | 9         | 75988641  | 75998640  | 6  | 6  | 0 | 1 | 5      |         |
| 10k | 4  | 55259324  | 55269323  | 3  | 3  | 3  | KIT    | 10 | 60058774  | 60068773  | 7 | 6 | 1 | 6 | BICC1    | 20        | 59509086  | 59519085  | 6  | 6  | 0 | 1 | 5      | CDH4    |
| 10k | 3  | 180399618 | 180409617 | 3  | 3  | 3  | PIK3CA | X  | 4058375   | 4068374   | 5 | 5 | 2 | 3 |          | 12        | 83787998  | 83797997  | 6  | 6  | 1 | 0 | 5      | SLC6A15 |
| 10k | 3  | 143659257 | 143669256 | 4  | 3  | 4  | ATR    | X  | 28829367  | 28839366  | 5 | 5 | 0 | 5 | IL1RAPL1 | 11        | 127867351 | 127877350 | 6  | 6  | 0 | 2 | 4      | ETS1    |

### Supplementary Table 7: Whole genome mutation clustering analysis in luminal ER+ breast cancer.

Shown are results from four different sliding windows of 1kbp, 2kbp, 5kbp, and 10kbp, used to identify clusters of somatic mutations. In tier 1 coding regions, somatic mutations cluster in significantly mutated genes (PIK3CA, TP53, MAP3K1, and ATR). In tier 2 and tier 3 noncoding regions, somatic mutations cluster in intronic regions of GPR126 and NRG3.







|                   |     |                |                |         |     |          |    |              |                      |   |      |      |    |       |      |       |          |                  |                        |            |                  |               |            |       |                  |                  |                |                |                |                |       |
|-------------------|-----|----------------|----------------|---------|-----|----------|----|--------------|----------------------|---|------|------|----|-------|------|-------|----------|------------------|------------------------|------------|------------------|---------------|------------|-------|------------------|------------------|----------------|----------------|----------------|----------------|-------|
| 1584 Z1031<br>0 A | x   | 251485033253_3 | NA             | 70 LumB | 3.1 | 1~<br>12 | 1  | NEGATIV<br>E | DUCTAL III III I     | 7 | 0.26 | 8 NA | NA | 0     | 0    | 0.268 | -1       | Responder        | N N<br>A A             | 7 7 0 3 0  | N N N<br>1 A A A | - - -         | N N<br>A A | - - - | N N<br>A A       | - - -            | N N<br>A A     | - - -          |                |                |       |
| 1585 Z1031<br>8 A | x x | 251485054660_2 | 2.51E+1<br>1   | 56 LumA | 2.5 | 1~<br>12 | 1  | POSITIV<br>E | LOBULA<br>R I III I  | 7 | 0.04 | 9 NA | NA | 0.003 | 3    | 0.046 | -0.93878 | Responder        | N N<br>A A             | 7 7 0 3 0  | 0 - - - - -      | - - -         | - - -      | - - - | - - -            | - - -            | - - -          | - - -          |                |                |       |
| 1586 Z1031<br>6 A | x   | 251485054608_1 | 2.51E+1<br>1 x | 66 LumB | 1.5 | 1~<br>02 | 0  | NEGATIV<br>E | DUCTAL II III I      | 6 | 0.15 | 3 NA | NA | 0.035 | 5    | 0.118 | -0.77124 | Responder        | N N<br>A A             | 7 7 1 1 0  | 1 - - - - -      | - - -         | - - -      | - - - | N<br>A           | - - -            | - - -          | - - -          |                |                |       |
| 1586 Z1031<br>7 A | x   | 251485034221_3 | 2.51E+1<br>1 x | 62 LumA | 1.2 | 1~<br>02 | 0  | NEGATIV<br>E | DUCTAL II III I      | 6 | 0.06 | 2 NA | NA | 0.039 | 9    | 0.023 | -0.37097 | Responder        | N N N N N<br>A A A A A | 0 0 A A A  | - - -            | - - -         | - - -      | - - - | N N N<br>0 A A A | - - -            | N N N<br>A A A | - - -          | N N N<br>A A A | - - -          |       |
| 1586 Z1031<br>8 A | x   | 251485054558_4 | NA             | 86 LumB | 1.7 | 1~<br>02 | 0  | NEGATIV<br>E | DUCTAL II III I      | 8 | 0.43 | 4 NA | NA | 0.081 | 1    | 0.353 | -0.81336 | Responder        | N N<br>A A             | 8 8 0 1 0  | 1 A A A          | - - -         | - - -      | - - - | N N N<br>1 A A A | - - -            | N N N<br>A A A | - - -          | N N N<br>A A A | - - -          |       |
| 1587 Z1031<br>0 A | x   | 251485036832_1 | 2.51E+1<br>1 x | 64 LumB | 1.3 | 1~<br>02 | 0  | NEGATIV<br>E | DUCTAL II III I      | 0 | 0.06 | 1 NA | NA | 0.15  | 0.15 | 0.089 | 1.45901  | NonResponde<br>r | N N<br>A A             | 7 7 7 1 0  | 1 A A A          | - - -         | - - -      | - - - | N N N<br>A A A   | - - -            | N N N<br>A A A | - - -          | N N N<br>A A A | - - -          |       |
| 1587 Z1031<br>9 A | x   | 251485036831_3 | 2.51E+1<br>1 x | 76 LumB | 6.3 | 3~<br>14 | 1  | NEGATIV<br>E | DUCTAL III III I     | 8 | 0.25 | 7 NA | NA | 0.005 | 5    | 0.252 | -0.98054 | Responder        | N N<br>A A             | 7 7 -1 6 0 | 0 A A A          | - - -         | - - -      | - - - | N N N<br>0 A A A | - - -            | N N N<br>A A A | - - -          | N N N<br>A A A | - - -          |       |
| 1588 Z1031<br>0 A | x   | 251485042959_3 | NA             | 75 LumB | 4   | 1~<br>02 | 0  | NEGATIV<br>E | LOBULA<br>R II III I | A | NA   | NA   | NA | 0.019 | 9    | NA    | NA       | Responder        | N N<br>A A             | 3 3 A 0 1  | 0 A A A          | - - -         | - - -      | - - - | N N N<br>0 A A A | - - -            | N N N<br>A A A | - - -          | N N N<br>A A A | - - -          |       |
| 1588 Z1031<br>2 A | x   | 251485054662_1 | 2.51E+1<br>1 x | 84 LumB | 1.8 | 1~<br>12 | 1  | NEGATIV<br>E | DUCTAL II III I      | 8 | 0.39 | 5 NA | NA | 0.153 | 3    | 0.242 | -0.61266 | NonResponde<br>r | N N<br>A A             | 8 8 0 4 0  | 1 A A A          | - - -         | - - -      | - - - | N N N<br>A A A   | - - -            | N N N<br>A A A | - - -          | N N N<br>A A A | - - -          |       |
| 1589 Z1031<br>2 A | x   | 251485035337_3 | 2.51E+1<br>1 x | 65 LumB | 2.4 | 1~<br>12 | 1  | NEGATIV<br>E | DUCTAL II III I      | 5 | 0.14 | 4 NA | NA | 0.246 | 6    | 0.102 | 0.70833  | NonResponde<br>r | N N<br>A A             | 5 5 0 5 0  | 0 A A A          | - - -         | - - -      | - - - | N N N<br>0 A A A | - - -            | N N N<br>A A A | - - -          | N N N<br>A A A | - - -          |       |
| 1589 Z1031<br>4 A | x   | 251485034013_1 | 2.51E+1<br>1 x | 64 LumA | 1.7 | 1~<br>02 | 0  | NEGATIV<br>E | DUCTAL II III I      | 8 | 0.05 | 9 NA | NA | 0     | 0    | 0.059 | -1       | Responder        | N N<br>A A             | 8 8 0 0 1  | 1 A A A          | - - -         | - - -      | - - - | N N N<br>1 A A A | - - -            | N N N<br>A A A | - - -          | N N N<br>A A A | - - -          |       |
| 1589 Z1031<br>7 A | x   | 251485036831_7 | NA             | 62 LumA | 8   | 3~<br>14 | 1  | NEGATIV<br>E | DUCTAL II III I      | 8 | 0.12 | 3 NA | NA | 0.121 | 1    | 0.002 | -0.01626 | NonResponde<br>r | N N<br>A A             | 7 7 -1 7 0 | 1 A A A          | - - -         | - - -      | - - - | N N N<br>A A A   | - - -            | N N N<br>A A A | - - -          | N N N<br>A A A | - - -          |       |
| 1589 Z1031<br>9 A | x   | 251485054661_1 | NA             | 84 LumB | 2.5 | 1~<br>02 | 0  | NEGATIV<br>E | DUCTAL I III I       | 8 | 0.25 | 6 NA | NA | 0.036 | 6    | -0.22 | -0.85938 | Responder        | N N<br>A A             | 4 4 -4 1 0 | 1 - - - - -      | - - -         | - - -      | - - - | N<br>A           | - - -            | - - -          | - - -          | - - -          |                |       |
| 1590 Z1031<br>1 A | x x | 251485042140_3 | 2.51E+1<br>1   | 81 LumB | 7   | 3~<br>14 | 1  | NEGATIV<br>E | DUCTAL II III I      | 8 | 0.21 | 4 NA | NA | 0.04  | 0.04 | 0.174 | -0.81308 | Responder        | N N<br>A A             | 6 6 -2 7 0 | 0 - - - - -      | - - -         | - - -      | - - - | N<br>A           | - - -            | - - -          | - - -          | - - -          |                |       |
| 1590 Z1031<br>6 A | x   | 251485056531_2 | NA             | 58 LumB | 2.1 | 1~<br>12 | 1  | NEGATIV<br>E | DUCTAL II III I      | 2 | 0.17 | 2 NA | NA | 0.073 | 3    | 0.099 | -0.57558 | Responder        | N N<br>A A             | 3 3 1 4 0  | 1 - - - - -      | - - -         | - - -      | - - - | N<br>A           | - - -            | - - -          | - - -          | - - -          |                |       |
| 1591 Z1031<br>0 A | x   | 251485038540_1 | NA             | 66 LumB | 2.3 | 1~<br>12 | 1  | NEGATIV<br>E | DUCTAL II III I      | 6 | 0.63 | NA   | NA | 0.178 | 0.17 | -     | 0.71746  | NonResponde<br>r | N N<br>A A             | 5 5 -1 4 0 | 1 - - - - -      | - - -         | - - -      | - - - | N N N<br>A A A   | - - -            | N N N<br>A A A | - - -          | N N N<br>A A A | - - -          |       |
| 1591 Z1031<br>3 A | x   | 251485034016_3 | 2.51E+1<br>1 x | 86 LumB | 1.6 | 1~<br>12 | 1  | NEGATIV<br>E | DUCTAL II III I      | 8 | 0.27 | 4 NA | NA | 0.031 | 1    | 0.243 | -0.88686 | Responder        | N N<br>A A             | 8 8 0 4 0  | 1 A A A          | - - -         | - - -      | - - - | N N N<br>1 A A A | - - -            | N N N<br>A A A | - - -          | N N N<br>A A A | - - -          |       |
| 1591 Z1031<br>7 A | x   | 251485042960_1 | NA             | 66 LumA | 1.8 | 1~<br>02 | 0  | NEGATIV<br>E | DUCTAL I III I       | 8 | 0.07 | 6 NA | NA | 0.008 | 8    | 0.068 | -0.89474 | Responder        | N N<br>A A             | 8 8 0 0 1  | 1 - - - - -      | - - -         | - - -      | - - - | N<br>A           | - - -            | - - -          | - - -          | - - -          |                |       |
| 1591 Z1031<br>9 A | x   | 251485053538_1 | NA             | 72 LumB | 1.8 | 1~<br>12 | 1  | NEGATIV<br>E | DUCTAL II III I      | 5 | 0.37 | 6 NA | NA | 0.432 | 0.43 | 2     | 0.056    | 0.14893          | NonResponde<br>r       | N N<br>A A | 7 7 2 5 0        | 1 A A A       | - - -      | - - - | - - -            | N N N<br>1 A A A | - - -          | N N N<br>A A A | - - -          | N N N<br>A A A | - - - |
| 1592 Z1031<br>1 A | x   | 251485033452_3 | 2.51E+1<br>1 x | 78 LumB | 3.1 | 1~<br>02 | 0  | NEGATIV<br>E | DUCTAL II III I      | 6 | 0.06 | 2 NA | NA | 0.027 | 0.02 | 7     | 0.035    | -0.56452         | Responder              | N N<br>A A | 8 8 2 1 0        | 1 - - - - -   | - - -      | - - - | - - -            | N<br>A           | - - -          | - - -          | - - -          | - - -          |       |
| 1593 Z1031<br>1 A | x   | 251485036029_1 | 2.51E+1<br>1 x | 79 LumB | 2.2 | 1~<br>2  | NA | POSITIV<br>E | DUCTAL II III I      | 7 | 0.29 | 5 NA | NA | 0     | 0    | 0.295 | -1       | Responder        | N N<br>A A             | 6 6 -1 A A | 0 A A A          | - - -         | - - -      | - - - | N N N<br>0 A A A | - - -            | N N N<br>A A A | - - -          | N N N<br>A A A | - - -          |       |
| 1594 Z1031<br>5 A | x   | 251485033453_3 | NA             | 55 LumB | 4   | 1~<br>12 | 1  | NEGATIV<br>E | DUCTAL II III I      | 8 | 0.41 | 2 NA | NA | 0.008 | 8    | 0.404 | -0.98058 | Responder        | N N<br>A A             | 6 6 -2 3 0 | 1 - - - - -      | - - -         | - - -      | - - - | N<br>A           | - - -            | - - -          | - - -          | - - -          |                |       |
| 1595 Z1031<br>0 A | x   | 251485053312_3 | 2.51E+1<br>1 x | 53 LumA | 0.1 | 1~<br>02 | 0  | NEGATIV<br>E | DUCTAL I III I       | 8 | 0.15 | 2 NA | NA | 0     | 0    | 0.152 | -1       | Responder        | N N<br>A A             | 7 7 -1 0 1 | 1 A A A          | - - -         | - - -      | - - - | N N N<br>1 A A A | - - -            | N N N<br>A A A | - - -          | N N N<br>A A A | - - -          |       |
| 1595 Z1031<br>2 A | x x | 251485054613_4 | 2.51E+1<br>1   | 62 LumB | 1.5 | 1~<br>12 | 1  | NEGATIV<br>E | DUCTAL II III I      | 8 | 0.38 | 5 NA | NA | 0.336 | 0.33 | 6     | 0.049    | -0.12727         | NonResponde<br>r       | N N<br>A A | 6 6 -2 5 0       | 0 A - - - - - | - - -      | - - - | - - -            | N<br>A           | - - -          | - - -          | - - -          | - - -          |       |
| 1595 Z1031<br>3 A | x   | 251485054661_4 | NA             | 76 LumB | 4   | 1~<br>12 | 1  | NEGATIV<br>E | DUCTAL II III I      | 6 | 0.41 | 7 NA | NA | 0.192 | 2    | 0.225 | -0.53957 | NonResponde<br>r | N N<br>A A             | 4 4 -2 4 0 | 0 - - - - -      | - - -         | - - -      | - - - | N<br>A           | - - -            | - - -          | - - -          | - - -          |                |       |
| 1596 Z1031<br>8 A | x   | 251485053312_1 | NA             | 66 LumB | 2   | 1~<br>12 | 1  | NA           | DUCTAL II III I      | 6 | 0.24 | 1 NA | NA | 0.038 | 8    | 0.203 | -0.84232 | Responder        | N N<br>A A             | 5 5 -1 4 0 | 0 A A A          | - - -         | - - -      | - - - | N N N<br>0 A A A | - - -            | N N N<br>A A A | - - -          | N N N<br>A A A | - - -          |       |
| 1597 Z1031<br>0 A | x   | 251485036029_3 | 2.51E+1<br>1   | 56 LumB | 2.6 | 1~<br>2  | NA | NEGATIV<br>E | DUCTAL II III I      | 6 | 0.76 | NA   | NA | 0.308 | 0.30 | 8     | 0.452    | -0.59474         | NonResponde<br>r       | N N<br>A A | 4 4 -2 A 0       | 1 - - - - -   | - - -      | - - - | - - -            | N<br>A           | - - -          | - - -          | - - -          | - - -          |       |

nodal  
status  
unknow  
n









|                   |     |               |         |     |                                    |         |     |           |                |                  |          |   |                 |    |       |                 |                |                  |            |            |           |                |           |           |           |           |            |           |           |
|-------------------|-----|---------------|---------|-----|------------------------------------|---------|-----|-----------|----------------|------------------|----------|---|-----------------|----|-------|-----------------|----------------|------------------|------------|------------|-----------|----------------|-----------|-----------|-----------|-----------|------------|-----------|-----------|
| 1639 Z1031<br>2 A | x   | 251485050627_ | 2.51E+1 | 1 x | max<br>tumor<br>dim<br>unknow<br>n | 84 LumB | 3.7 | 1~<br>1 2 | NEGATIV<br>1 E | DUCTAL III III I | II/II    | 8 | 0.52<br>7 NA    | NA | 0.223 | 0.22<br>3 0.304 | -<br>-0.57685  | NonResponde<br>r | N N<br>A A | 8 8 0 5 0  | 0 0 A A   | N N N<br>A A A | - - -     | N<br>A    | - +       | N<br>A    | N N<br>A A | +         |           |
| 1639 Z1031<br>8 A | x x | 251485054557_ | 2.51E+1 | 1   |                                    | 67 LumB | NA  | 1~<br>0 2 | NEGATIV<br>0 E | DUCTAL II III I  | II/II    | 8 | 0.11<br>2 NA    | NA | 0.064 | 0.06<br>4 0.048 | -<br>-0.42857  | Responder        | N N<br>A A | 8 8 0 1 0  | 1 - - - - | - - - - -      | - - - - - | - - - - - | - - - - - | - - - - - | - - - - -  | - - - - - |           |
| 1640 Z1031<br>2 A | x   | 251485052903_ | 2.51E+1 | 1 x |                                    | 73 LumB | 2.4 | 1~<br>1 2 | NEGATIV<br>1 E | DUCTAL II III I  | II/II    | 8 | 0.32<br>3 NA    | NA | 0.106 | 0.10<br>6 0.217 | -<br>-0.67183  | NonResponde<br>r | N N<br>A A | 8 8 0 4 0  | 0 1 A A   | N N N<br>A A A | - - -     | N<br>A    | + -       | N<br>A    | N N<br>A A | -         |           |
| 1640 Z1031<br>8 A | x   | 251485054537_ | NA      |     |                                    | 66 LumA | 3.8 | 1~<br>1 2 | NEGATIV<br>1 E | DUCTAL II III I  | II/II    | 6 | 0.02<br>2 NA    | NA | 0.346 | 0.34<br>6 0.324 | 14.7272<br>7 r | NonResponde<br>r | N N<br>A A | 6 6 0 5 0  | 0 - - - - | - - - - -      | - - - - - | - - - - - | - - - - - | - - - - - | - - - - -  | - - - - - |           |
| 1641 Z1031<br>1 A | x   | 251485054537_ | NA      |     |                                    | 61 LumA | 1.9 | 1~<br>1 2 | NEGATIV<br>1 E | DUCTAL III III I | II/II    | 7 | 0.10<br>7 NA    | NA | 0.024 | 0.02<br>4 0.083 | -<br>-0.7757   | Responder        | N N<br>A A | 8 8 1 3 0  | 0 1 A A   | N N N<br>A A A | - - -     | N<br>A    | - -       | N<br>A    | N N<br>A A | -         |           |
| 1643 Z1031<br>1 A | x   | 251485053322_ | 2.51E+1 | 1   |                                    | 74 LumB | 1.9 | 1~<br>0 2 | NEGATIV<br>0 E | DUCTAL II III I  | II/II    | 1 | 0.08<br>1 NA    | NA | 0.022 | 0.02<br>2 0.059 | -<br>-0.7284   | Responder        | N N<br>A A | 8 8 A 0 1  | 1 + + - - | - - - - -      | - - - - - | - - - - - | - - - - - | - - - - - | - - - - -  | - - - - - |           |
| 1643 Z1031<br>9 A | x   | 251485054608_ | 2.51E+1 | 1 x |                                    | 59 LumB | 3.5 | 1~<br>0 2 | NEGATIV<br>0 E | DUCTAL II III I  | II/II    | 8 | 0.44<br>6 NA    | NA | 0     | 0 0.446         | -<br>-1        | Responder        | N N<br>A A | 7 7 -1 0 1 | 1 A A A   | N N N<br>A A A | - - -     | N<br>A    | - -       | N<br>A    | N N<br>A A | -         |           |
| 1644 Z1031<br>1 A | x   | 251485052896_ | NA      |     |                                    | 55 LumB | 2.3 | 1~<br>1 2 | NEGATIV<br>1 E | DUCTAL III III I | II/II    | 5 | 0.10<br>2 NA    | NA | 0.007 | 0.00<br>7 0.095 | -<br>-0.93137  | Responder        | N N<br>A A | 8 8 3 3 0  | 0 1 A A   | N N N<br>A A A | + - -     | - - -     | - - -     | - - -     | - - -      | - - -     |           |
| 1644 Z1031<br>2 A | x   | 251485054556_ | 2.51E+1 | 1 x |                                    | 59 LumA | 15  | 3~<br>1 2 | NEGATIV<br>1 E | LOBULA<br>R      | II III I | 8 | 0.28<br>9 NA    | NA | 0.032 | 0.03<br>2 0.257 | -<br>-0.88927  | Responder        | N N<br>A A | 6 6 -2 7 0 | 0 1 A A   | N N N<br>A A A | - - -     | N<br>A    | - -       | N<br>A    | N N<br>A A | -         |           |
| 1645 Z1031<br>0 A | x   | 251485054659_ | NA      |     |                                    | 62 LumA | 4   | 1~<br>0 2 | NEGATIV<br>0 E | DUCTAL II III I  | II/II    | 6 | 0.14<br>NA      | NA | 0.031 | 0.03<br>1 0.109 | -<br>-0.77857  | Responder        | N N<br>A A | 2 2 -4 4 0 | 0 1 A A   | N N N<br>A A A | - - -     | N<br>A    | - -       | N<br>A    | N N<br>A A | -         |           |
| 1645 Z1031<br>4 A | x   | 251485052895_ | 2.51E+1 | 1   |                                    | 61 LumB | 3   | 1~<br>0 2 | NEGATIV<br>0 E | DUCTAL III III I | II/II    | 4 | 0.45<br>6 NA    | NA | 0.349 | 0.34<br>9 0.107 | -<br>-0.23465  | NonResponde<br>r | N N<br>A A | 6 6 2 2 0  | 0 1 - - - | - - - + -      | - - - - - | - - - - - | - - - - - | - - - - - | - - - - -  | - - - - - |           |
| 1648 Z1031<br>1 A | x   | 251485053314_ | 2.51E+1 | 1   |                                    | 60 LumB | 2   | 1~<br>0 2 | NEGATIV<br>0 E | LOBULA<br>R      | II III I | 5 | 0.25<br>6 NA    | NA | 0.183 | 0.18<br>3 0.073 | -<br>-0.28516  | NonResponde<br>r | N N<br>A A | 5 5 0 1 0  | 0 - - - - | - - - - -      | - - - - - | - - - - - | - - - - - | - - - - - | - - - - -  | - - - - - |           |
| 1648 Z1031<br>6 A | x   | 251485054660_ | 2.51E+1 | 1 x |                                    | 76 LumA | 2   | 1~<br>0 2 | NEGATIV<br>0 E | DUCTAL II III I  | II/II    | 8 | 0.05<br>7 NA    | NA | 0.014 | 0.01<br>4 0.043 | -<br>-0.75439  | Responder        | N N<br>A A | 8 8 0 0 1  | 0 A A A   | N N N<br>A A A | - - -     | N<br>A    | - -       | N<br>A    | N N<br>A A | -         |           |
| 1649 Z1031<br>2 A | x   | 251485055400_ | 2.51E+1 | 1 x |                                    | 69 LumA | 5   | 1~<br>1 2 | NEGATIV<br>1 E | LOBULA<br>R      | II III I | 8 | 0.06<br>4 NA    | NA | 0     | 0 0.064         | -<br>-1        | Responder        | N N<br>A A | 8 8 0 3 0  | 0 1 A A   | N N N<br>A A A | - - -     | N<br>A    | - -       | N<br>A    | N N<br>A A | -         |           |
| 1649 Z1031<br>5 A | x   | 251485054609_ | 2.51E+1 | 1 x |                                    | 75 LumA | 1.3 | 1~<br>0 2 | NEGATIV<br>0 E | DUCTAL II III I  | II/II    | 5 | 0.02<br>NA      | NA | 0.027 | 0.02<br>7 0.007 | 0.35           | Responder        | N N<br>A A | 7 7 2 0 1  | 0 A A A   | N N N<br>A A A | - - -     | N<br>A    | - -       | N<br>A    | N N<br>A A | -         |           |
| 1653 Z1031<br>1 A | x   | 251485055266_ | 2.51E+1 | 1 x | nodal<br>status<br>unknow<br>n     | 71 LumA | 0.6 | 1~<br>2 A | NEGATIV<br>2 A | DUCTAL II III I  | II/II    | 8 | 0.07<br>6 NA    | NA | 0.06  | 0.06<br>0.016   | -<br>-0.21053  | Responder        | N N<br>A A | 8 8 0 A 0  | 0 1 A A   | N N N<br>A A A | - - -     | N<br>A    | - -       | N<br>A    | N N<br>A A | -         |           |
| 1653 Z1031<br>9 A | x   | 251485055398_ | NA      |     |                                    | 58 LumB | 1   | 1~<br>0 2 | NEGATIV<br>0 E | DUCTAL II III I  | II/II    | 7 | 0.10<br>7 NA    | NA | 0.014 | 0.01<br>4 0.093 | -<br>-0.86916  | Responder        | N N<br>A A | 8 8 1 0 1  | 1 A A A   | N N N<br>A A A | - - -     | N<br>A    | - -       | N<br>A    | N N<br>A A | +         |           |
| 1656 Z1031<br>1 A | x   | 251485055265_ | 2.51E+1 | 1 x |                                    | 67 LumA | 3.2 | 1~<br>1 2 | NEGATIV<br>1 E | DUCTAL I III I   | II/II    | 8 | 0.06<br>2 NA    | NA | 0.011 | 0.01<br>1 0.051 | -<br>-0.82258  | Responder        | N N<br>A A | 6 6 -2 3 0 | 0 A A A   | N N N<br>A A A | - - -     | N<br>A    | + -       | N<br>A    | N N<br>A A | -         |           |
| 1656 Z1031<br>6 A | x x | 251485055266_ | 2.51E+1 | 1   |                                    | 58 LumB | 5.1 | 3~<br>1 4 | NEGATIV<br>1 E | LOBULA<br>R      | I III I  | 6 | NA              | NA | 0.043 | 0.04<br>3 NA    | NA             | Responder        | N N<br>A A | 7 7 1 7 0  | 0 1 - - - | - - - - -      | - - - - - | - - - - - | - - - - - | - - - - - | - - - - -  | - - - - - |           |
| 1657 Z1031<br>9 A | x   | 251485055265_ | 2.51E+1 | 1 x |                                    | 59 LumA | 4   | 1~<br>1 2 | NEGATIV<br>1 E | DUCTAL III III I | II/II    | 8 | 0.11<br>NA      | NA | 0.006 | 0.00<br>6 0.104 | -<br>-0.94545  | Responder        | N N<br>A A | 7 7 -1 3 0 | 0 1 - - - | - - - - -      | - - - - - | - - - - - | - - - - - | - - - - - | - - - - -  | - - - - - |           |
| 1658 Z1031<br>9 A | x   | 251485055264_ | 2.51E+1 | 1   |                                    | 56 LumA | 1.5 | 1~<br>0 2 | NEGATIV<br>0 E | DUCTAL II III I  | II/II    | 8 | 0.07<br>7 NA    | NA | 0.152 | 0.15<br>2 0.075 | 0.97402<br>6 r | NonResponde<br>r | N N<br>A A | 8 8 0 1 0  | 0 - - - - | - - - - -      | - - - - - | - - - - - | - - - - - | - - - - - | - - - - -  | - - - - - |           |
| 1659 Z1031<br>0 A | x   | 251485055399_ | 2.51E+1 | 1 x |                                    | 72 LumA | 2.8 | 1~<br>0 2 | NEGATIV<br>0 E | DUCTAL II III I  | II/II    | 8 | 0.12<br>8 NA    | NA | 0     | 0 0.128         | -<br>-1        | Responder        | N N<br>A A | 8 8 0 0 1  | 1 - - - - | - - - - -      | - - - - - | - - - - - | - - - - - | - - - - - | - - - - -  | - - - - - |           |
| 1659 Z1031<br>8 A | x   | 251485055402_ | 2.51E+1 | 1 x |                                    | 85 LumB | 3   | 1~<br>0 2 | NEGATIV<br>0 E | DUCTAL II III I  | II/II    | 8 | 0.23<br>NA      | NA | 0.112 | 0.11<br>2 0.118 | -<br>-0.51304  | NonResponde<br>r | N N<br>A A | 8 8 0 1 0  | 0 1 - - - | - - - - -      | - - - - - | - - - - - | - - - - - | - - - - - | - - - - -  | - - - - - | - - - - - |
| 1670 Z1031<br>2 B | x   | 251485060459_ | 2.51E+1 | 1 x |                                    | 62 LumA | NA  | 1~<br>2   | NEGATIV<br>1 E | DUCTAL III III I | II/II    | 8 | 0.02<br>1 NA    | NA | 0.007 | 0.00<br>7 0.014 | -<br>-0.66667  | Responder        | N N<br>A A | 7 7 -1 3 0 | 0 1 - - - | - - - + -      | - - - - - | - - - - - | - - - - - | - - - - - | - - - - -  | - - - - - | - - - - - |
| 1672 Z1031<br>7 B | x x | 251485056231_ | NA      |     |                                    | 66 LumB | NA  | 1~<br>2   | POSITIVE<br>0  | DUCTAL II III I  | II/II    | 7 | 0.43<br>NA      | NA | 0.153 | 0.15<br>3 0.277 | -<br>-0.64419  | NonResponde<br>r | N N<br>A A | 7 7 0 1 0  | 0 1 - - - | - - - - -      | - - - - - | - - - - - | - - - - - | - - - - - | - - - - -  | - - - - - | - - - - - |
| 1674 Z1031<br>4 B | x   | 251485060427_ | 2.51E+1 | 1 x |                                    | 86 LumB | NA  | 1~<br>2   | NEGATIV<br>0 E | DUCTAL III III I | II/II    | 8 | 0.75<br>0.06 NA | NA | 0.025 | 0.02<br>5 0.725 | -<br>-0.96667  | Responder        | N<br>8 A   | 7 7 -1 0 1 | 1 A - - - | - - - - -      | - - - - - | - - - - - | - - - - - | - - - - - | - - - - -  | - - - - - | - - - - - |
| 1674 Z1031<br>5 B | x   | 251485069914_ | 2.51E+1 | 1 x |                                    | 53 LumA | NA  | 1~<br>2   | NEGATIV<br>1 E | DUCTAL II III I  | II/II    | 7 | 0.12<br>0.01 NA | NA | 0.003 | 0.00<br>3 0.124 | -<br>-0.97638  | Responder        | N<br>7 A   | 8 8 1 3 0  | 0 1 - - - | - - - - -      | - - - - - | - - - - - | - - - - - | - - - - - | - - - - -  | - - - - - | - - - - - |









2100 Z1031 251485070354\_ 1~ NEGATIV II/II 0.00 -  
 9 B x 4 NA 57 LumA NA NA 2 0 E DUCTAL II I/II I 8 3 0.01 NA 0 0 0.003 -1 Responder N  
 8 A 8 8 0 0 1 1 - - - + - - + A + - - -

**Supplementary Table 8: Clinical feature of 317 tumor samples.**

Clinical information, tumor characteristics, and sequencing information for all cases.

| Mutually exclusively mutated pairs |                | 77 WGS/Exome cases |       |      |      |       | 108 cases from ext 1&2 |       |      |      |       | 132 cases from ext 3 |       |      |      |       | 77+108 cases |       |      |      |       | 77+132 cases |       |      |      |       | 77+108+132 cases |       |      |      |       |       |
|------------------------------------|----------------|--------------------|-------|------|------|-------|------------------------|-------|------|------|-------|----------------------|-------|------|------|-------|--------------|-------|------|------|-------|--------------|-------|------|------|-------|------------------|-------|------|------|-------|-------|
| Gene A                             | Gene B         | A Mut              | B Mut | Both | Excl | p-val | A Mut                  | B Mut | Both | Excl | p-val | A Mut                | B Mut | Both | Excl | p-val | A Mut        | B Mut | Both | Excl | p-val | A Mut        | B Mut | Both | Excl | p-val | A Mut            | B Mut | Both | Excl | p-val |       |
| GATA3                              | PIK3CA         | 7                  | 37    | 1    | 42   | 0.012 | 9                      | 42    | 2    | 47   | 0.169 | 13                   | 52    | 3    | 59   | 0.101 | 16           | 79    | 3    | 89   | 0.008 | 20           | 89    | 4    | 1    | 10    | 0.003            | 29    | 1    | 6    | 8     | 0.002 |
| MAP3K1                             | TP53           | 9                  | 14    | 0    | 23   | 0.058 | 10                     | 16    | 2    | 22   | 0.844 | 20                   | 21    | 1    | 39   | 0.094 | 19           | 30    | 2    | 45   | 0.308 | 29           | 35    | 1    | 62   | 0.004 | 39               | 51    | 3    | 84   | 0.095 |       |
| MAP2K4 +MAP3K1                     | TP53           | 11                 | 14    | 0    | 25   | 0.028 | 15                     | 16    | 4    | 23   | 0.967 | 23                   | 21    | 2    | 40   | 0.189 | 26           | 30    | 4    | 48   | 0.494 | 34           | 35    | 2    | 65   | 0.007 | 49               | 51    | 6    | 88   | 0.306 |       |
| CDH1                               | GATA3          | 8                  | 7     | 0    | 15   | 0.317 | N                      | N     | N    | N    | NA    | 22                   | 13    | 0    | 35   | 0.068 | N            | N     | N    | N    | NA    | 30           | 20    | 0    | 50   | 0.014 | NA               | NA    | A    | NA   | NA    |       |
| CDH1                               | TP53           | 8                  | 14    | 0    | 22   | 0.082 | N                      | N     | N    | N    | NA    | 22                   | 21    | 2    | 39   | 0.227 | N            | N     | N    | N    | NA    | 30           | 35    | 2    | 61   | 0.021 | NA               | NA    | A    | NA   | NA    |       |
| GATA3                              | TP53           | 7                  | 14    | 0    | 21   | 0.110 | 9                      | 16    | 1    | 23   | 0.603 | 13                   | 21    | 2    | 30   | 0.635 | 16           | 30    | 1    | 44   | 0.171 | 20           | 35    | 2    | 51   | 0.147 | 29               | 51    | 3    | 74   | 0.319 |       |
| CDH1                               | PIK3CA         | 8                  | 37    | 4    | 37   | 0.394 | A                      | A     | A    | A    | NA    | 22                   | 52    | 8    | 58   | 0.326 | A            | A     | A    | A    | NA    | 30           | 89    | 12   | 95   | 0.169 | NA               | NA    | A    | NA   | NA    |       |
| RUNX1                              | TP53           | 3                  | 14    | 0    | 17   | 0.422 | N                      | N     | N    | N    | NA    | 4                    | 21    | 0    | 25   | 0.486 | N            | N     | N    | N    | NA    | 7            | 35    | 0    | 42   | 0.180 | NA               | NA    | A    | NA   | NA    |       |
| PIK3CA                             | TP53           | 37                 | 14    | 9    | 33   | 0.764 | 42                     | 16    | 6    | 46   | 0.449 | 52                   | 21    | 6    | 61   | 0.097 | 79           | 30    | 15   | 79   | 0.721 | 89           | 35    | 15   | 94   | 0.257 | 13               | 1     | 51   | 21   | 14    | 0.307 |
| CDH1                               | RB1            | 8                  | 4     | 0    | 12   | 0.531 | N                      | N     | N    | N    | NA    | 22                   | 2     | 0    | 24   | 0.688 | N            | N     | N    | N    | NA    | 30           | 6     | 0    | 36   | 0.294 | NA               | NA    | A    | NA   | NA    |       |
| MAP2K4                             | MAP3K1         | 2                  | 9     | 0    | 11   | 0.707 | 5                      | 10    | 0    | 15   | 0.641 | 3                    | 20    | 0    | 23   | 0.608 | 7            | 19    | 0    | 26   | 0.439 | 5            | 29    | 0    | 34   | 0.372 | 10               | 39    | 0    | 49   | 0.298 |       |
| GATA3                              | MAP2K4 +MAP3K1 | 7                  | 11    | 1    | 16   | 0.585 | 9                      | 15    | 0    | 24   | 0.245 | 13                   | 23    | 2    | 32   | 0.557 | 16           | 26    | 1    | 40   | 0.204 | 20           | 34    | 3    | 48   | 0.380 | 29               | 49    | 3    | 72   | 0.328 |       |

  

| Concurrently mutated pairs |                | 77 WGS/Exome cases |       |      |      |       | 108 cases from ext 1&2 |       |      |      |       | 132 cases from ext 3 |       |      |      |       | 77+108 cases |       |      |      |       | 77+132 cases |       |      |      |       | 77+108+132 cases |       |      |      |       |
|----------------------------|----------------|--------------------|-------|------|------|-------|------------------------|-------|------|------|-------|----------------------|-------|------|------|-------|--------------|-------|------|------|-------|--------------|-------|------|------|-------|------------------|-------|------|------|-------|
| Gene A                     | Gene B         | A Mut              | B Mut | Both | Excl | p-val | A Mut                  | B Mut | Both | Excl | p-val | A Mut                | B Mut | Both | Excl | p-val | A Mut        | B Mut | Both | Excl | p-val | A Mut        | B Mut | Both | Excl | p-val | A Mut            | B Mut | Both | Excl | p-val |
| MAP2K4 +MAP3K1             | PIK3CA         | 11                 | 37    | 9    | 30   | 0.101 | 15                     | 42    | 10   | 37   | 0.017 | 23                   | 52    | 13   | 49   | 0.097 | 26           | 79    | 19   | 67   | 0.001 | 34           | 89    | 22   | 79   | 0.030 | 49               | 1     | 32   | 11   | 0.000 |
| MAP3K1                     | PIK3CA         | 9                  | 37    | 7    | 32   | 0.220 | 10                     | 42    | 7    | 38   | 0.039 | 20                   | 52    | 13   | 46   | 0.019 | 19           | 79    | 14   | 70   | 0.007 | 29           | 89    | 20   | 78   | 0.012 | 39               | 1     | 27   | 6    | 0     |
| MAP2K4                     | PDGFRA         | 2                  | 2     | 1    | 2    | 0.072 | N                      | N     | N    | N    | NA    | 3                    | 1     | 1    | 2    | 0.021 | N            | N     | N    | N    | NA    | 5            | 3     | 2    | 4    | 0.002 | NA               | NA    | A    | NA   | NA    |
| CBFB                       | MAP2K4 +MAP3K1 | 2                  | 11    | 2    | 9    | 0.033 | N                      | N     | N    | N    | NA    | A                    | A     | A    | A    | NA    | N            | N     | N    | N    | NA    | A            | A     | A    | NA   | NA    | NA               | A     | NA   | NA   | NA    |
| MAP2K4 +MAP3K1             | RUNX1          | 11                 | 3     | 2    | 10   | 0.091 | N                      | N     | N    | N    | NA    | 23                   | 4     | 1    | 25   | 0.549 | N            | N     | N    | N    | NA    | 34           | 7     | 3    | 35   | 0.158 | NA               | NA    | A    | NA   | NA    |
| MAP2K4                     | PIK3CA         | 2                  | 37    | 2    | 35   | 0.367 | 5                      | 42    | 3    | 41   | 0.340 | 9                    | 52    | 0    | 55   | 0.170 | 7            | 79    | 5    | 76   | 0.170 | 5            | 89    | 2    | 90   | 0.823 | 10               | 13    | 1    | 13   | 0.459 |

**Supplementary Table 9: Mutation Relation.** Shown are permutation based mutation-relation test results. Given two genes, and the samples in which these genes are altered by non-silent variants, a permutation-based approach calculates the expected number of samples in which both genes are concurrently altered, and those in which the two genes are altered mutually exclusively. Based on the expected and observed values, p-values are calculated for concurrence and exclusivity. The table shows these calculations for all significantly altered genes, and with MAP2K4 and MAP3K1 variants merged as if affecting the same gene. These calculations are shown separately for the 3 distinct cohorts of cases, and in 3 possible combinations of the cohorts to improve sensitivity. A Mut, B Mut - Number of samples altered in Genes A and B. Both - Number of samples concurrently altered in both genes. Excl - Number of samples altered exclusively in one of the two genes. p-val - P-value for concurrence or mutual exclusivity of variants between Gene A and Gene B.

| Chr | Start     | Stop      | # Samples<br>Amp | # Samples<br>Del | Type | Genes                                                                 |
|-----|-----------|-----------|------------------|------------------|------|-----------------------------------------------------------------------|
| 2   | 23450000  | 23790000  | 1                | 0                | AMP  | <i>KLHL29</i>                                                         |
| 4   | 73770000  | 74840000  | 3                | 0                | AMP  | <i>COX18,AFP,ALB,RASSF6,IL8,ANKRD17,AFM</i>                           |
| 4   | 75190000  | 75490000  | 2                | 0                | AMP  | <i>EPGN,EREG,MTHFD2L</i>                                              |
| 4   | 75690000  | 76630000  | 2                | 0                | AMP  | <i>LOC441025,RCHY1,AREG,PARM1,BTC</i>                                 |
| 4   | 126950000 | 127600000 | 2                | 1                | AMP  | .                                                                     |
| 4   | 152410000 | 152870000 | 3                | 2                | AMP  | <i>PRSS48,PET112L,FAM160A1</i>                                        |
| 4   | 152780000 | 153470000 | 3                | 0                | AMP  | <i>PET112L,FAM160A1,FBXW7</i>                                         |
| 5   | 45910000  | 46690000  | 7                | 1                | AMP  | .                                                                     |
| 5   | 49150000  | 49470000  | 2                | 0                | AMP  | .                                                                     |
| 6   | 20940000  | 21320000  | 3                | 1                | AMP  | <i>CDKAL1</i>                                                         |
| 11  | 19570000  | 20200000  | 7                | 1                | AMP  | <i>LOC100126784,DBX1,NAV2</i>                                         |
| 11  | 20490000  | 21550000  | 6                | 1                | AMP  | <i>SLC6A5,NELL1</i>                                                   |
| 11  | 34040000  | 34750000  | 8                | 3                | AMP  | <i>NAT10,CAT,ABTB2,ELF5,CAPRIN1,EHF</i>                               |
| 11  | 68850000  | 69150000  | 10               | 3                | AMP  | .                                                                     |
| 11  | 72210000  | 72560000  | 5                | 4                | AMP  | <i>ATG16L2,FCHSD2</i>                                                 |
| 11  | 74670000  | 74980000  | 6                | 4                | AMP  | <i>MIR326,SNORD15A,SNORD15B,KLHL35,RPS3,SERPINH1,MAP6,GDPD5,ARRB1</i> |
| 11  | 75190000  | 75550000  | 8                | 5                | AMP  | <i>DGAT2,UVRAG</i>                                                    |
| 11  | 76660000  | 77300000  | 8                | 7                | AMP  | <i>GDPD4,CLNS1A,AQP11,C11orf67,RSF1,PAK1,INTS4</i>                    |
| 11  | 77540000  | 77970000  | 7                | 7                | AMP  | <i>KCTD21,NARS2,GAB2,USP35</i>                                        |
| 11  | 77810000  | 78700000  | 7                | 2                | AMP  | <i>NARS2,ODZ4</i>                                                     |
| 12  | 68440000  | 70220000  | 6                | 0                | AMP  | <i>TSPAN8,KCNMB4,CNOT2,RAB3IP,PTPRR,PTPRB,LGR5</i>                    |
| 12  | 87890000  | 88250000  | 10               | 0                | AMP  | .                                                                     |
| 12  | 90410000  | 90860000  | 11               | 0                | AMP  | .                                                                     |
| 12  | 90880000  | 91250000  | 11               | 0                | AMP  | <i>BTG1</i>                                                           |
| 12  | 91100000  | 91680000  | 7                | 0                | AMP  | <i>C12orf74,CLLU1OS,CLLU1,PLEKHG7</i>                                 |
| 18  | 51950000  | 52310000  | 5                | 1                | AMP  | .                                                                     |
| 18  | 52480000  | 52850000  | 5                | 1                | AMP  | <i>WDR7</i>                                                           |
| 18  | 52850000  | 53240000  | 4                | 3                | AMP  | <i>BOD1P,ST8SIA3</i>                                                  |
| 18  | 56860000  | 57360000  | 6                | 3                | AMP  | <i>CDH20</i>                                                          |
| 18  | 57280000  | 57880000  | 7                | 2                | AMP  | <i>CDH20,PIGN,RNF152</i>                                              |
| 20  | 51050000  | 51560000  | 19               | 0                | AMP  | <i>TSHZ2</i>                                                          |
| 20  | 51560000  | 52040000  | 18               | 0                | AMP  | <i>SUMO1P1,ZNF217,BCAS1</i>                                           |
| 20  | 51950000  | 52320000  | 19               | 0                | AMP  | <i>CYP24A1,PFDN4,BCAS1</i>                                            |
| 20  | 52380000  | 53240000  | 18               | 0                | AMP  | <i>DOK5</i>                                                           |



|    |           |           |   |    |     |                                                                                                                                                                                                                                                                                                    |
|----|-----------|-----------|---|----|-----|----------------------------------------------------------------------------------------------------------------------------------------------------------------------------------------------------------------------------------------------------------------------------------------------------|
| X  | 61300000  | 61640000  | 3 | 2  | AMP | .                                                                                                                                                                                                                                                                                                  |
| 2  | 10190000  | 10610000  | 0 | 2  | DEL | <i>MIR4261,SNORA80B,HPCAL1,ODC1,C2orf48</i>                                                                                                                                                                                                                                                        |
| 2  | 120770000 | 121570000 | 1 | 5  | DEL | <i>INHBB,LOC84931,GLI2</i>                                                                                                                                                                                                                                                                         |
| 2  | 239590000 | 239890000 | 0 | 9  | DEL | <i>MGC16025,HDAC4</i>                                                                                                                                                                                                                                                                              |
| 6  | 21190000  | 21610000  | 3 | 4  | DEL | <i>CDKAL1</i>                                                                                                                                                                                                                                                                                      |
| 6  | 106210000 | 106610000 | 4 | 7  | DEL | .                                                                                                                                                                                                                                                                                                  |
| 7  | 66510000  | 66980000  | 2 | 3  | DEL | .                                                                                                                                                                                                                                                                                                  |
| 8  | 31510000  | 31940000  | 4 | 9  | DEL | <i>NRG1</i>                                                                                                                                                                                                                                                                                        |
| 8  | 31900000  | 32350000  | 5 | 9  | DEL | <i>NRG1</i>                                                                                                                                                                                                                                                                                        |
| 10 | 98770000  | 99330000  | 2 | 10 | DEL | <i>FRAT1,FRAT2,PGAM1,ANKRD2,ARHGAP19,EXOSC1,ZDHHC16,RRP12,UBTD1,SLIT1,MMS19,ARH<br/>GAP19-SLIT1</i>                                                                                                                                                                                                |
| 10 | 101430000 | 102960000 | 2 | 6  | DEL | <i>SNORA12,BLOC1S2,NDUFB8,MIR608,LZTS2,SFXN3,KAZALD1,TLX1,CUTC,COX15,NCRNA00093,<br/>CPN1,ERLIN1,PKD2L1,CWF19L1,WNT8B,NCRNA00263,HIF1AN,SEC31B,C10orf2,FAM178A,MRPL4<br/>3,SEMA4G,TLX1NB,ABCC2,ENTPD7,SCD,PAX2,CHUK,DNMBP,PDZD7</i>                                                                |
| 10 | 106510000 | 106950000 | 3 | 4  | DEL | <i>SORCS3</i>                                                                                                                                                                                                                                                                                      |
| 10 | 123070000 | 123540000 | 3 | 5  | DEL | <i>ATE1,FGFR2</i>                                                                                                                                                                                                                                                                                  |
| 13 | 22050000  | 22490000  | 2 | 5  | DEL | <i>BASP1P1</i>                                                                                                                                                                                                                                                                                     |
| 13 | 22520000  | 23070000  | 2 | 5  | DEL | <i>SGCG,SACS,TNFRSF19</i>                                                                                                                                                                                                                                                                          |
| 13 | 23350000  | 23890000  | 3 | 8  | DEL | <i>MIR2276,C1QTNF9B,PCOTH,C1QTNF9,SPATA13,MIPEP</i>                                                                                                                                                                                                                                                |
| 13 | 26640000  | 27440000  | 1 | 7  | DEL | <i>RPL21P28,SNORD102,RPL21,SNORA27,RASL11A,GSX1,ATP5EP2,CDX2,GTF3A,MTIF3,LNX2,POL<br/>R1D,USP12,PDX1</i>                                                                                                                                                                                           |
| 13 | 27580000  | 28850000  | 2 | 7  | DEL | <i>LOC100288730,POMP,FLT1,PAN3,SLC46A3,MTUS2</i>                                                                                                                                                                                                                                                   |
| 13 | 29410000  | 29710000  | 4 | 5  | DEL | <i>LOC440131,KATNAL1</i>                                                                                                                                                                                                                                                                           |
| 13 | 29720000  | 30440000  | 4 | 5  | DEL | <i>LOC100188949,HMGB1,USPL1,ALOX5AP,C13orf33,KATNAL1,C13orf26</i>                                                                                                                                                                                                                                  |
| 13 | 30500000  | 30850000  | 3 | 4  | DEL | <i>HSPH1,B3GALT1</i>                                                                                                                                                                                                                                                                               |
| 18 | 53340000  | 54190000  | 3 | 5  | DEL | <i>FECH,NARS,NEDD4L,ATP8B1</i>                                                                                                                                                                                                                                                                     |
| 18 | 54050000  | 54460000  | 3 | 4  | DEL | <i>MIR122,ALPK2,NEDD4L</i>                                                                                                                                                                                                                                                                         |
| 19 | 61940000  | 63010000  | 2 | 8  | DEL | <i>PEG3-<br/>AS1,AURKC,ZNF543,TRAPPC2P1,ZNF304,ZNF749,VN1R1,ZNF772,ZNF419,ZNF773,ZNF416,ZIK1,<br/>ZNF530,ZNF134,ZNF211,ZNF551,ZNF154,ZNF671,ZNF776,MIMT1,PEG3,ZIM3,DUXA,USP29,ZNF46<br/>0,ZNF264,ZNF805,ZNF548,ZNF547,ZNF17,ZNF549,ZNF550,ZSCAN4,ZNF586,ZIM2<br/>SEZ6L,MIR1302-1,MYO18B,ASPHD2</i> |
| 22 | 24470000  | 25160000  | 1 | 7  | DEL |                                                                                                                                                                                                                                                                                                    |

### Supplementary Table 10: Focal Copy Number Variants

The following regions were identified as recurrent DNA copy number amplifications or deletions in 46 whole-genome samples by the CMDS algorithm. Most regions are small, with a median size of 0.47Mb, and 93% contain less than 10 genes. Several regions contain known cancer-related genes, including ZNF217, BCAS1, GAB2, and ELF5.

| ChrA | Outer_startA     | Inner_startA     | ChrB | Outer_startB     | Inner_startB     | Event_type | Size   | Patient | OrientationA | OrientationB | Inferred_mechanism | GeneA   | TranscriptA | StrandA | SubStructureA | GeneB | TranscriptB | StrandB | SubStructureB | DeletedGenes |                                                                                                                                                                                                                                                                                                                                                                                                                                                                                                                                                                                                                                                                                                                                                                                                                                                                                                                                                                                                                                                                                                                                                                                                                                                                                                                                                                                                                                                                                                                                                                                                                                                                                                                                                                                                                                                                                                                                                                                                                                                                                                                                                                                                                                                                                                                                                                                                                                                                                                                                                                                                                                                                                                                                 |
|------|------------------|------------------|------|------------------|------------------|------------|--------|---------|--------------|--------------|--------------------|---------|-------------|---------|---------------|-------|-------------|---------|---------------|--------------|---------------------------------------------------------------------------------------------------------------------------------------------------------------------------------------------------------------------------------------------------------------------------------------------------------------------------------------------------------------------------------------------------------------------------------------------------------------------------------------------------------------------------------------------------------------------------------------------------------------------------------------------------------------------------------------------------------------------------------------------------------------------------------------------------------------------------------------------------------------------------------------------------------------------------------------------------------------------------------------------------------------------------------------------------------------------------------------------------------------------------------------------------------------------------------------------------------------------------------------------------------------------------------------------------------------------------------------------------------------------------------------------------------------------------------------------------------------------------------------------------------------------------------------------------------------------------------------------------------------------------------------------------------------------------------------------------------------------------------------------------------------------------------------------------------------------------------------------------------------------------------------------------------------------------------------------------------------------------------------------------------------------------------------------------------------------------------------------------------------------------------------------------------------------------------------------------------------------------------------------------------------------------------------------------------------------------------------------------------------------------------------------------------------------------------------------------------------------------------------------------------------------------------------------------------------------------------------------------------------------------------------------------------------------------------------------------------------------------------|
| 2    | 05 45<br>90 36   | 05 45<br>90 36   | 2    | 08 45<br>79 36   | 08 45<br>79 36   | D<br>E     | 2<br>2 | B<br>R  |              |              |                    | Z<br>M  | EN<br>ST    |         |               |       |             |         |               |              |                                                                                                                                                                                                                                                                                                                                                                                                                                                                                                                                                                                                                                                                                                                                                                                                                                                                                                                                                                                                                                                                                                                                                                                                                                                                                                                                                                                                                                                                                                                                                                                                                                                                                                                                                                                                                                                                                                                                                                                                                                                                                                                                                                                                                                                                                                                                                                                                                                                                                                                                                                                                                                                                                                                                 |
| 0    | 90 000<br>90 003 | 90 000<br>90 003 | 0    | 79 112<br>79 112 | 79 112<br>79 112 | L<br>E     | 9<br>8 | 0<br>1  | 1            | 1            | NH<br>EJ           | N<br>D8 | 112<br>75   | -       | intron<br>3   |       |             | -1      | intron3       | N/A          |                                                                                                                                                                                                                                                                                                                                                                                                                                                                                                                                                                                                                                                                                                                                                                                                                                                                                                                                                                                                                                                                                                                                                                                                                                                                                                                                                                                                                                                                                                                                                                                                                                                                                                                                                                                                                                                                                                                                                                                                                                                                                                                                                                                                                                                                                                                                                                                                                                                                                                                                                                                                                                                                                                                                 |
| 1    | 05 90<br>13 44   | 05 90<br>13 44   | 1    | 24 90<br>78 46   | 24 90<br>78 46   | E<br>L     | 6<br>3 | 1<br>0  | 1            | 1            | MM<br>EJ           | N/<br>A | N/A         | /       | N/<br>A       |       |             |         |               |              |                                                                                                                                                                                                                                                                                                                                                                                                                                                                                                                                                                                                                                                                                                                                                                                                                                                                                                                                                                                                                                                                                                                                                                                                                                                                                                                                                                                                                                                                                                                                                                                                                                                                                                                                                                                                                                                                                                                                                                                                                                                                                                                                                                                                                                                                                                                                                                                                                                                                                                                                                                                                                                                                                                                                 |
| 2    | 13 000<br>13 003 | 13 000<br>13 003 | 2    | 78 112<br>78 112 | 78 112<br>78 112 | L<br>E     | 3<br>2 | 0<br>1  |              |              |                    | A       | N/A         | A       | N/A           |       |             |         |               |              | N/A<br>ESPL1 VDR THAP2 OR6C6 DGKA ACSS3 AQP5 BLOC1S1 AAAS<br>ITGA5 NXPH4 PPM1H NDUFA4L2 CNPY2 IL26 PTPRR SP7<br>TMBIM4 RARG KCN3 ACVR1B WNT1 CCDC59 STAT2 OR6C74<br>DNAJC14 GTSF1 NFE2 SYT1 LRIG3 TMEM194A NAV3 LIMA1<br>LRR1Q1 OR2AP1 HNRPA1L3 ELA1 C12orf66 PRR13 SENP1 KRT82<br>RASSF3 SLC11A2 TMTC3 LLP3 SDR9C7 GRIP1 FAM113B GLIPR1<br>RPS26P53 ATP5G2 RPAP3 MYF5 HOXC13 NPFF IL23A SMARCC2<br>C12orf28 R3HDM2 LALBA MSRB3 RAB3IP SLC4A8 KRT8P9 PAWR<br>OR6C70 KRT77 SLC38A1 KRT76 OSBPL8 RNF41 KRT80 COQ10A<br>TUBA1A AVIL SMARCD1 KRT72 YEATS4 METTL7B uc001ryd.1<br>MCRS1 KRT73 DDX23 TBC1D15 ARHGAP9 USP15 C12orf41 LYZ<br>OR6C68 PRIM1 B4GALNT1 NAB2 SLC35E3 CSRP2 GRASP<br>TMEM19 ACVRL1 RHEBL1 CAND1 LGR5 C12orf56 SILV DNAJC22<br>HOXC11 TBK1 MYO1A DHH CEP290 TAC3 LINTA SLC38A2 KRT1<br>ZC3H10 H1FNT OR6C65 GLI1 IL22 FAM62A HOXC5 C12orf62 MIP<br>OR6C2 PPP1R1A SCN8A LRFP1 RAP1B KCNC2 SNS CYP27B1<br>ARF3 KIF5A KRT4 RPSAP52 OR10P1 MLL2 MBD6 DIP2B ANKRD33<br>ASB8 MDM2 CPM IRAK3 SLC16A7 OR6C1 OBFC2B RBMS1P<br>CACNB3 DAZAP2 TBC1D30 FMNL3 GALNT6 PPFIA2 HOXC12<br>FAM19A2 KRT5 PCBP2 SP1 PTPRQ MARS CTDSP2 ALX1 ACN2<br>C12orf26 KRT83 SMUG1 SFRS2IP HOXC8 HOXC9 ZNF740 NR4A1<br>RASSF9 FRS2 MFSD5 LARP4 KRT6C ZFC3H1 ERBB3 INHBC<br>IGFBP6 STAC3 HDAC7 HOXC4 TFCP2 KITLG NACA SLC6A15<br>ORMDL2 KRT6B DDI3 CDK4 PLEKHA9 ITGA7 WIF1 FAM186B<br>CBX5 IFNG CCDC65 KRT18P19 C12orf68 TMEM106C KIAA1602<br>SPRYD4 OR6C76 DPY19L2 CPSF6 TSPAN8 KRT74 MDM1 DBX2<br>ZNF385A MUCL1 MYL6B BAZ2A FAIM2 HOXC6 PA2G4P4 SLC48A1<br>RDH16 TMPRSS12 HOXC10 C12orf50 TPH2 CCT2 TRHDE<br>MGAT4C PDE1B DCTN2 COL2A1 ATP5B XPOT GPD1 DDN<br>C12orf61 CCNT1 BIN2 OR9K1P HELB KCNMB4 PFKM MYF6 OS9<br>STAT6 KRT84 PRPF40B CD63 AQP2 GEFT COPZ1 NCKAP1L<br>GPR182 AVPR1A TSMF SPRYD3 CSRN2P RPL21P18 MMP19<br>KRT85 DTX3 CSAD NTS C12orf44 PFDN5 TMEM5 RAB5B TUBA1C<br>RAPGEF3 OR8S1 KRT79 RPL14P1 TMBIM6 SRGAP1 PTGES3<br>PHLDA1 NELL2 ZBTB39 CAPS2 FIGLN2 OR6C4 CS WNT10B<br>PTPRB LEMD3 AQP6 SLC38A4 ATF1 FKBP11 RAGGAP1P RND1<br>MAP3K12 E2F7 KRT3 FAM119B KRT71 LMBRL1 TARBP2 IKZF4<br>ARID2 KRT78 POU6F1 CALCOCO1 ATF7 LRRC10 ZNF641 KRR1<br>ENSG00000202582 KIAA0748 SPATS2 MARCH9 KRT6A OR6C75<br>BBS10 TSPAN31 AMIGO2 XRC6BP1 MON2 SUXO PAN2 ANHR2<br>ANO6 GDF11 HSD17B6 PHC1B KRT81 LACRT GLIPR1L1 AGAP2<br>RBMS2P CNOT2 ADCY6 C12orf10 MYL6 TROAP SHMT2 SLC39A5<br>KRT86 OR6C3 GLS2 PRKAG1 OR10A7 RDH5 ANP32D INHBE<br>PIP4K2C HMG2A METTL7A APOF RAB21 TENC1 LETMD1 LASS5<br>TUBA1B KRT75 C12orf29 CDK2 NEUROD4 C1QL4 NUP107<br>FAM186A TIMELESS PPP1R12A C12orf64 GPR84 PRPH KRT7<br>TMTC2 WIBG NAP1L1 GLIPR1L2 DYRK2 METTL1 SOAT2<br>OR10AD1 ITGB7 ANKRD52 BCDIN3D EIF4B KRT2 OR9K2 BEST3<br>ZDHHC17 C12orf54 DCD |
| 1    | 32 42<br>54 42   | 32 42<br>54 42   | 1    | 32 87<br>32 87   | 32 87<br>32 87   | D<br>E     | 0<br>1 | 0<br>1  |              |              |                    | NH      | M<br>11     |         | intron        |       |             |         |               |              |                                                                                                                                                                                                                                                                                                                                                                                                                                                                                                                                                                                                                                                                                                                                                                                                                                                                                                                                                                                                                                                                                                                                                                                                                                                                                                                                                                                                                                                                                                                                                                                                                                                                                                                                                                                                                                                                                                                                                                                                                                                                                                                                                                                                                                                                                                                                                                                                                                                                                                                                                                                                                                                                                                                                 |
| 2    | 73 000<br>73 003 | 73 000<br>73 003 | 2    | 88 112<br>88 112 | 88 112<br>88 112 | L<br>E     | 3<br>2 | 0<br>1  | 1            | 1            | EJ                 | EJ      | 7           | 34      | 1             | 1     | N/A         |         |               |              |                                                                                                                                                                                                                                                                                                                                                                                                                                                                                                                                                                                                                                                                                                                                                                                                                                                                                                                                                                                                                                                                                                                                                                                                                                                                                                                                                                                                                                                                                                                                                                                                                                                                                                                                                                                                                                                                                                                                                                                                                                                                                                                                                                                                                                                                                                                                                                                                                                                                                                                                                                                                                                                                                                                                 |
| 1    | 85 71<br>60 60   | 85 71<br>60 60   | 1    | 23 55<br>3 60    | 23 55<br>3 60    | T<br>X     | /      | 1       |              |              |                    | NH      | N/A         | /       | N/<br>A       |       |             |         |               |              |                                                                                                                                                                                                                                                                                                                                                                                                                                                                                                                                                                                                                                                                                                                                                                                                                                                                                                                                                                                                                                                                                                                                                                                                                                                                                                                                                                                                                                                                                                                                                                                                                                                                                                                                                                                                                                                                                                                                                                                                                                                                                                                                                                                                                                                                                                                                                                                                                                                                                                                                                                                                                                                                                                                                 |
| 1    | 79 71<br>79 71   | 79 71<br>79 71   | 1    | 61 71<br>61 71   | 61 71<br>61 71   | C<br>T     | /      | 1       |              |              |                    | NH      | N/A         | /       | N/<br>A       |       |             |         |               |              |                                                                                                                                                                                                                                                                                                                                                                                                                                                                                                                                                                                                                                                                                                                                                                                                                                                                                                                                                                                                                                                                                                                                                                                                                                                                                                                                                                                                                                                                                                                                                                                                                                                                                                                                                                                                                                                                                                                                                                                                                                                                                                                                                                                                                                                                                                                                                                                                                                                                                                                                                                                                                                                                                                                                 |
| 0    | 11 000<br>11 003 | 11 000<br>11 003 | 3    | 37 112<br>37 112 | 37 112<br>37 112 | X<br>A     | 3<br>2 | 0<br>1  | -1           | -1           | EJ                 | A       | N/A         | A       | N/A           |       |             |         |               |              |                                                                                                                                                                                                                                                                                                                                                                                                                                                                                                                                                                                                                                                                                                                                                                                                                                                                                                                                                                                                                                                                                                                                                                                                                                                                                                                                                                                                                                                                                                                                                                                                                                                                                                                                                                                                                                                                                                                                                                                                                                                                                                                                                                                                                                                                                                                                                                                                                                                                                                                                                                                                                                                                                                                                 |











KIFAP3 TPM3 MRPL55 FLG2 NPHS2 MARK1 MGST3 FAM177B  
 RAB3GAP2 INSR ZNF648 C1orf98 ACBD6 CREG1 ATP1A4 JTB  
 THBS3 ASCL5 TOR3A PMF1 VHL COPA FAM163A LENEP C1orf2  
 C1orf46 MUC1 LEMD1 F13B OR6K1P ITPKB PKLR EFN4 IL24  
 MAEL CTSE CLK2 SHISA4 TRIM11 NCF2 SPRR2A TROVE2  
 S100A5 GLUL DEGS1 ELF3 RPL26P11 TDRD5 LAD1 EPHX1  
 KLHL12 NPR1 CDC42BPA OR10T1P SLC30A10 C1orf157 RGS4  
 NR5A2 RCSD1 RPL13AP8 PPP2R5A TSEN15 POP4L1 RAB4A  
 MYOC C1orf55 SLC25A44 MTX1 HMCN1 C1orf65 C1orf14 RNASEL  
 NAV1 OR10K1 C1orf148 SLAMF1 SLC30A1 RGL1 FCGR3B  
 ARHGEP2 CAMSAP1L1 NCRNA00083 PIGR CFH RCOR3 DUSP27  
 TCHHL1 RASSF5 CACNA1S FCRL3 ATP8V1G3 RGS13 OR10J9P  
 SMG5 GPR52 CYCSF2 C1orf74 SPTA1 ARF1 TMCC2 CCT3  
 C1orf111 TNN C1orf58 IER5 UBAP2L C1orf129 S100A2 RALGPS2  
 APCS CNTN2 IL6R CHRNB2 SSR2 RD3 MFS04 CHI3L1 C1orf120  
 IRF6 C1orf197 RNPEP NIT1 TBX19 CRP TMO1 MOSC2 CD247  
 S100A7L2 KKBKE CRNN GPATCH2 FAM72A SYT11 SLC26A9  
 SUS4 ATP2B4 ENAH CDC73 FCRL4 CNIH4 POGK SPRR2B ADAR  
 ESRRG JMJD4 FLAD1 CD48 C1orf21 GORAB RIT1 SH2D1B MND4  
 KIF14 OR10J3 LIN9 SELE C1orf105 PBX1 RAB13 USF1 C1orf25  
 SLAMF7 ASH1L UHMK1 FCRL5 VAMP4 RPL17P8 OLFML2B  
 S100A10 C1orf35 NOS1AP NMNAT2 IGSF8 FAIM3 RNF2 ADIPOR1  
 RGS1 SH2D2A NR113 PRRX1 NEK7 LEFTY1 C1orf189 KIAA1614  
 MYBPH LCE5A C1orf112 WNT3A IFI16 DDX59 GJC2 C1orf226  
 KRT18P28 TNN1 LCE3A RPL4P3 CFHR2 TIPRL SDHC PROX1  
 LGTN ATF6 uc001gud.2 CKS1B ARPC5 C1orf145 FMO2 RPTN  
 LAMB3 ZC3H11A NDUFS2 B4GALT3 HIST3H2A SNRPE NVL NENF  
 SCAMP3 S100A3 TDRD10 CD1E DTL TOR1AIP1 SPRR2F KCNJ9  
 CR2 DPM3 OR6N2 TTC24 C1orf53 SMG7 CSRP1 ANGEL2  
 SLC41A1 VANGL2 GLT25D2 IGSF9 TIMM17A TMEM78 FLG  
 RAG1AP1 ZNF281 TATDN3 SNAP47 PBXIP1 SLC45A3 OR10T2  
 ILDR2 EFNA1 CENPL GPR25 SNFT RASAL2 LCE2D YY1AP1  
 PLA2G4A TMEM79 C1orf92 RGS21 TRAF3IP3 TOMM40L RBBP5  
 DSTYK CFHR4 PTPRV PMVK RPL4P2 IQWD1 FCER1A LM0D1  
 SELP LAMC2 CD84 ETV3L CACYBP S100A14 F5 FAM78B MYOG  
 C1orf49 SPFR3 GPATC4 TOR1AIP2 IARS2 ADAMT54 EPRS  
 OSOX1 DISP1 KIRREL PPOX FMO8P HSPA6 GUK1 C1orf115  
 DENND4B SRGAP2 DCST2 METTL13 OR6N1 APOA1BP SLAMF8  
 RABGAP1L SYT14 MPZL1 KLHL20 TNNT2 OR10J1 RGS8 LOR  
 APOA2 EFNA3 C1orf192 NES SEMA4A NUKA2 PEX19 PTGS2  
 USH2A NSL1 CFHR1 OPTC FCRL2 CABC1 LCE2C C1orf204  
 METTL11B NUP133 ASTN1 UCHL5 BLZF1 WNT9A C4BPB OR6K5P  
 AIM2 SMCP TLR5 MIA3 RNF187 FAM71A FCGR3A SPRR2G  
 C1orf107 HAX1 REN CFHR3 ACTA1 C1orf66 NCSTN PDC LCE2B  
 S100A7 NHLH1 PYHIN1 TRIM46 FCRLA FMO9P SPRR4 LCE1D  
 CRTC2 FCER1G C1orf77 WDR42A PAPPA2 F11R LY9 HSD11B1  
 KCNN3 HDGF S100A7A ZBTB7B ZNF847P DDR2 OR6K6 FMO11P  
 BRP44 HAPLN2 SFT2D2 FMOD C4BPA IGFN1 ISG20L2 OBSCN  
 GBA TNFSF18 PTPN14 SERPINC1 SLC9A11 PPFIA4 CNIH3  
 HHIPL2 uc001fxh.2 RPL26P12 FCAMR TMEM183A ROBLD3  
 C1orf186 PRELP S100A12 KIF21B PYGO2 LMNA KCNJ10 CD46  
 C1orf147 KPRP CAMK1G OR10K2 HSD17B7 OR6Y1 KCTD3  
 C1orf69 POU2F1 KISS1 C1orf97 G0S2 RAB25 FCRLB PCTK3  
 GPA33 RRP15 PYCR2 OR2AQ1P SLC39A1 C1orf110 STX6 ZBTB41  
 BAT2D1 S100A6 HIST3H2BB PIGC S100A1 TPR LCE2A GATAD2B  
 LCE1C FBXO28 PSEN2 SPRR1A LELP1 PGLYRP4 WDR26 OR6K3  
 LCE3C UAP1 OR10R1P PEAR1 LMX1A C1orf116 ADAM15 FMO7P  
 NPL S100A16 FMO1 KLHDC9 LCE1E S100A8 IVL PLEKHA6 CHIT1  
 C1orf125 UBE2Q1 PRC C HCN3 NUF2 SOAT1 MR1 C1orf220 RGS18  
 TNR FCRL1 PRR9 LHX9 ZC3H11B PGLYRP3 FDP5 ERVK5 SPHAR  
 ARL8A EEF1AL12 CRB1 LCE3B RPS6K1 MSTO1 DUSP10 PVRL4  
 C1orf156 EDEM3 DARC LCE4A ALDH9A1 GBAP SPRR2E ADCY10  
 S100A11 LAMC1 ZNF678 SRP9 SMYD2 NEK2 OR6K4P OR10R2  
 JARID1B CREB3L4 PTPN7 C1orf9 TP53BP2 S100A13 SNAPIN  
 LYPLAL1 TMEM206 UBE2T SLAMF6 CENPF UFC1 ELK4 C1orf43  
 C1orf68 XCL2 HLX HHAT TMEM81 ANGPTL1 MDM4 RHBG RGS1  
 MPN2 CR1 ENSG00000216295 INTS3 SLC19A2 SPRR1B TMEM63A  
 PFDN2 CD1C PIGM S100A9 UCK2 LBR PARP1 DHX9 PTPRC  
 B3GALT2 ACTBP11 DARS2 C1orf95 DUSP23 CRCT1 RPS27 LCE1F  
 HRNR KCNH1 XPR1

|   |    |    |   |    |    |   |   |   |    |    |     |   |       |
|---|----|----|---|----|----|---|---|---|----|----|-----|---|-------|
|   | 2. | 2. |   | 2. | 2. |   | 9 | B |    | A  | EN  |   |       |
|   | 28 | 28 |   | 28 | 28 |   | 8 | R |    | B  | ST  |   | utr   |
|   | E  | E  |   | E  | E  |   | 5 | C |    | C  | 003 |   | _e    |
|   | +0 | +0 |   | +0 | +0 | D | 2 | 1 | NH | B1 | 445 | - | xo    |
| 1 | 8  | 8  | 1 | 8  | 8  | E | 1 | 1 | EJ | 0  | 17  | 1 | n1    |
|   |    |    |   |    |    | L | 1 | 1 |    | 0  | 17  | 1 | 3     |
|   |    |    |   |    |    |   |   |   |    |    |     |   | TAF5L |

ENST00000258281

-1 intron0

TAF5L







ZBTB10 PKHD1L1 MAL2 WISP1 TMEM74 OSR2 MED30 TTC35  
 TRIM55 C8orf37 IL7 CYP7A1 ANGPT1 C8orf44 RIPK2 POP1  
 CHMP4C ZFAT FAM49B FBXO43 SNX31 GRHL2 UBE2W MTERFD1  
 HEY1 VPS13B KIAA0196 LACTB2 ST18 PABPCP5 FAM84B  
 ATP6V1C1 RSP02 LRP12 FER1L6 NDUFB9 PTDSS1 FAM82B  
 YWHAZ TMEM67 WDR67 FAM83A KIAA1429 MTFR1 CDH17

|   |       |       |       |       |   |   |   |    |     |     |     |     |     |     |     |     |        |                 |     |         |                                                                                              |
|---|-------|-------|-------|-------|---|---|---|----|-----|-----|-----|-----|-----|-----|-----|-----|--------|-----------------|-----|---------|----------------------------------------------------------------------------------------------|
| 8 | 1.27  | 1.27  | 1.27  | 1.27  | D | 1 | 1 | NH | N/A    | N/A             | N/A |         |                                                                                              |
| 8 | 1.31  | 1.31  | 1.31  | 1.31  | D | 1 | 1 | NH | N/A    | N/A             | N/A |         |                                                                                              |
| 1 | 31.79 | 31.79 | 31.79 | 31.79 | D | 1 | 1 | NH | B   | EN  | ST  | 000 | 003 | 801 | 1   | 1   | BRCA2  | ENST00000380152 | 1   | intron2 | N/A                                                                                          |
| 3 | 61.1  | 61.1  | 94.1  | 94.1  | E | 2 | 2 | EJ | A2  | 52  |     |     |     |     |     |     |        |                 |     |         |                                                                                              |
| 7 | 1E+08 | 1E+08 | 1E+08 | 1E+08 | D | 1 | 1 | NH | N/A    | N/A             | N/A | N/A     | N/A                                                                                          |
| 2 | 29.94 | 29.94 | 29.95 | 29.95 | D | 6 | 7 | MM | G   | RI  | K1  | 000 | 003 | 277 | 1   | 4   | GRIK1  | ENST00000327783 | -1  | intron4 | N/A                                                                                          |
| 1 | 42.96 | 42.96 | 1.33  | 1.33  | E | 6 | 2 | EJ |     |     |     |     |     |     |     |     |        |                 |     |         |                                                                                              |
| 1 | 78.55 | 78.55 | 79.28 | 79.28 | D | 9 | 4 | MM | N/A    | N/A             | N/A | N/A     | N/A                                                                                          |
| 1 | 60.33 | 60.33 | 1.89  | 1.89  | E | 4 | 2 | EJ |     |     |     |     |     |     |     |     |        |                 |     |         |                                                                                              |
| 1 | 80.62 | 80.62 | 85.27 | 85.27 | D | 4 | 3 | MM | N/A | CCDC83 | ENST00000342404 | 1   | intron4 | DLG2 CCDC89 ANKRD42 CREBZF TMEM126A FAM181B RAB30 PCF11 PRCP C11orf82 CCDC90B SYTL2 TMEM126B |
| 1 | 19.51 | 19.51 | 1.98  | 1.98  | E | 3 | 2 | EJ |     |     |     |     |     |     |     |     |        |                 |     |         |                                                                                              |
| 8 | 40.12 | 40.12 | 40.12 | 40.12 | D | 3 | 1 | MM | N/A    | N/A             | N/A | N/A     | N/A                                                                                          |
| 8 | 74.34 | 74.34 | 8.63  | 8.63  | E | 5 | 2 | EJ |     |     |     |     |     |     |     |     |        |                 |     |         |                                                                                              |
| 8 | 38.42 | 38.42 | 38.50 | 38.50 | D | 6 | 1 | NH | F   | G   | R1  | 000 | 003 | 414 | 1   | 1   | N/A    | N/A             | N/A | N/A     | N/A                                                                                          |
| 8 | 35.99 | 35.99 | 8.77  | 8.77  | E | 7 | 2 | EJ |     |     |     |     |     |     |     |     |        |                 |     |         |                                                                                              |
| 2 | 53.55 | 53.55 | 42.92 | 42.92 | C | N | 1 | MM | N/A    | N/A             | N/A | N/A     | N/A                                                                                          |
| 0 | 59.12 | 59.12 | 2.40  | 2.40  | T | X | A | EJ |     |     |     |     |     |     |     |     |        |                 |     |         |                                                                                              |
| 1 | 20.07 | 20.07 | 2.15  | 2.15  | T | X | A | NH | N/A    | N/A             | N/A | N/A     | N/A                                                                                          |
| 4 | 33.33 | 33.33 | 0.43  | 0.43  | X | A | 2 | EJ |     |     |     |     |     |     |     |     |        |                 |     |         |                                                                                              |
| 2 | 38.42 | 38.42 | 2.20  | 2.20  | C | N | 1 | MM | N/A | RUNX1  | ENST00000300305 | -1  | intron1 | N/A                                                                                          |
| 0 | 93.85 | 93.85 | 2.41  | 2.41  | T | X | A | EJ |     |     |     |     |     |     |     |     |        |                 |     |         |                                                                                              |
| 2 | 12.96 | 12.96 | 2.86  | 2.86  | C | N | 1 | MM | P   | T   | 87  | 000 | 003 | 731 | 1   | 1   | CLDN14 | ENST00000342108 | -1  | intron0 | N/A                                                                                          |
| 0 | 62.62 | 62.62 | 1.78  | 1.78  | X | A | 2 | EJ |     |     |     |     |     |     |     |     |        |                 |     |         |                                                                                              |













|   |                                                  |                                                  |   |                                                  |                                                  |             |                       |             |   |   |          |                   |                                     |   |                            |         |                 |     |          |     |
|---|--------------------------------------------------|--------------------------------------------------|---|--------------------------------------------------|--------------------------------------------------|-------------|-----------------------|-------------|---|---|----------|-------------------|-------------------------------------|---|----------------------------|---------|-----------------|-----|----------|-----|
| 7 | 86<br>28<br>15<br>80                             | 86<br>28<br>15<br>80                             | 7 | 86<br>26<br>21                                   | 86<br>28<br>26<br>21                             | D<br>E<br>L | 1<br>0<br>4<br>1<br>6 | B<br>R<br>C | 1 | 1 | NH<br>EJ | G<br>R<br>M<br>3  | EN<br>ST<br>000<br>003<br>616<br>69 | 1 | intr<br>on<br>2            | GRM3    | ENST00000361669 | 1   | intron2  | N/A |
| 1 | 1.<br>74<br>E<br>+0<br>8                         | 1.<br>74<br>E<br>+0<br>8                         | 1 | 1.<br>74<br>E<br>+0<br>8                         | 1.<br>74<br>E<br>+0<br>8                         | D<br>E<br>L | 1<br>8<br>0<br>3      | B<br>R<br>C | 1 | 1 | NH<br>EJ | R<br>F<br>W<br>D2 | EN<br>ST<br>000<br>003<br>676<br>67 | - | intr<br>on<br>14           | RFWD2   | ENST00000367667 | -1  | intron14 | N/A |
| X | 73<br>84<br>89<br>49<br>1.<br>03<br>E<br>+0<br>8 | 73<br>84<br>89<br>49<br>1.<br>03<br>E<br>+0<br>8 | X | 73<br>85<br>18<br>79<br>1.<br>03<br>E<br>+0<br>8 | 73<br>85<br>18<br>79<br>1.<br>03<br>E<br>+0<br>8 | D<br>E<br>L | 2<br>9<br>3<br>1<br>6 | B<br>R<br>C | 1 | 1 | NH<br>EJ | N/<br>A           | N/A                                 | N | N/<br>A                    | N/A     | N/A             | N/A | N/A      | N/A |
| 1 | 1.<br>03<br>E<br>+0<br>8                         | 1.<br>03<br>E<br>+0<br>8                         | 1 | 1.<br>03<br>E<br>+0<br>8                         | 1.<br>03<br>E<br>+0<br>8                         | D<br>E<br>L | 1<br>2<br>1<br>6      | B<br>R<br>C | 1 | 1 | NH<br>EJ | N/<br>A           | N/A                                 | N | N/<br>A                    | N/A     | N/A             | N/A | N/A      | N/A |
| 5 | 57<br>31<br>04<br>42                             | 57<br>31<br>04<br>42                             | 5 | 57<br>31<br>98<br>91                             | 57<br>31<br>98<br>91                             | D<br>E<br>L | 9<br>4<br>1<br>6      | B<br>R<br>C | 1 | 1 | NH<br>EJ | N/<br>A           | N/A                                 | N | N/<br>A                    | N/A     | N/A             | N/A | N/A      | N/A |
| 2 | 1.<br>57<br>E<br>+0<br>8                         | 1.<br>57<br>E<br>+0<br>8                         | 2 | 1.<br>57<br>E<br>+0<br>8                         | 1.<br>57<br>E<br>+0<br>8                         | D<br>E<br>L | 4<br>7<br>1<br>6      | B<br>R<br>C | 1 | 1 | NH<br>EJ | G<br>P<br>D2      | EN<br>ST<br>000<br>003<br>104<br>54 | 1 | intr<br>on<br>0            | GPD2    | ENST00000310454 | 1   | intron0  | N/A |
| 1 | 57<br>42<br>92<br>32                             | 57<br>42<br>92<br>32                             | 1 | 57<br>42<br>93<br>18                             | 57<br>42<br>93<br>18                             | D<br>E<br>L | 8<br>5<br>6           | B<br>R<br>C | 1 | 1 | NH<br>EJ | N/<br>A           | N/A                                 | N | N/<br>A                    | N/A     | N/A             | N/A | N/A      | N/A |
| 2 | 18<br>02<br>25<br>58                             | 18<br>02<br>25<br>58                             | 2 | 18<br>02<br>49<br>62                             | 18<br>02<br>49<br>62                             | D<br>E<br>L | 2<br>4<br>0<br>5      | B<br>R<br>C | 1 | 1 | NH<br>EJ | N/<br>A           | N/A                                 | N | N/<br>A                    | N/A     | N/A             | N/A | N/A      | N/A |
| 3 | 35<br>36<br>19<br>59                             | 35<br>36<br>19<br>59                             | 3 | 35<br>36<br>62<br>88                             | 35<br>36<br>62<br>88                             | D<br>E<br>L | 4<br>3<br>2<br>7      | B<br>R<br>C | 1 | 1 | MM<br>EJ | M<br>M<br>KL      | EN<br>ST<br>000<br>003<br>606<br>31 | - | intr<br>on<br>3            | DCAMKL1 | ENST00000360631 | -1  | intron3  | N/A |
| 1 | 97<br>87<br>48<br>88                             | 97<br>87<br>48<br>88                             | 1 | 97<br>87<br>76<br>98                             | 97<br>87<br>76<br>98                             | D<br>E<br>L | 2<br>8<br>0<br>9      | B<br>R<br>C | 1 | 1 | NH<br>EJ | FA<br>R<br>P1     | EN<br>ST<br>000<br>003<br>195<br>62 | 1 | cd<br>s_<br>ex<br>on<br>15 | FARP1   | ENST00000319562 | 1   | intron16 | N/A |
| 8 | 1.<br>35<br>E<br>+0<br>8                         | 1.<br>35<br>E<br>+0<br>8                         | 8 | 1.<br>35<br>E<br>+0<br>8                         | 1.<br>35<br>E<br>+0<br>8                         | D<br>E<br>L | 5<br>6<br>1<br>6      | B<br>R<br>C | 1 | 1 | NH<br>EJ | N/<br>A           | N/A                                 | N | N/<br>A                    | N/A     | N/A             | N/A | N/A      | N/A |
| 1 | 55<br>61<br>70<br>8                              | 55<br>61<br>70<br>8                              | 1 | 55<br>64<br>12<br>8                              | 55<br>64<br>12<br>8                              | D<br>E<br>L | 2<br>4<br>1<br>9      | B<br>R<br>C | 1 | 1 | NH<br>EJ | A<br>N<br>O<br>2  | EN<br>ST<br>000<br>003<br>270<br>87 | - | intr<br>on<br>21           | ANO2    | ENST00000327087 | -1  | intron21 | N/A |
| 4 | 12<br>01<br>64<br>48                             | 12<br>01<br>64<br>48                             | 4 | 12<br>01<br>70<br>69                             | 12<br>01<br>70<br>69                             | D<br>E<br>L | 6<br>2<br>1<br>0      | B<br>R<br>C | 1 | 1 | NH<br>EJ | N/<br>A           | N/A                                 | N | N/<br>A                    | N/A     | N/A             | N/A | N/A      | N/A |
| 6 | 11<br>35<br>30<br>9                              | 11<br>35<br>30<br>9                              | 6 | 11<br>35<br>47<br>7                              | 11<br>35<br>47<br>7                              | D<br>E<br>L | 1<br>6<br>1<br>9      | B<br>R<br>C | 1 | 1 | NH<br>EJ | N/<br>A           | N/A                                 | N | N/<br>A                    | N/A     | N/A             | N/A | N/A      | N/A |

|   |                                                  |                                                  |                                                  |                                                  |             |                            |                       |   |   |          |                         |                                                   |             |         |     |        |         |                 |     |                |     |
|---|--------------------------------------------------|--------------------------------------------------|--------------------------------------------------|--------------------------------------------------|-------------|----------------------------|-----------------------|---|---|----------|-------------------------|---------------------------------------------------|-------------|---------|-----|--------|---------|-----------------|-----|----------------|-----|
| 1 | 2.<br>17<br>E<br>+0<br>8                         | 2.<br>17<br>E<br>+0<br>8                         | 2.<br>17<br>E<br>+0<br>8                         | 2.<br>17<br>E<br>+0<br>8                         | D<br>E<br>L | 4<br>6<br>3<br>8           | B<br>R<br>C<br>1<br>6 | 1 | 1 | MM<br>EJ | N/<br>A                 | N/A                                               | N<br>/<br>A | N/<br>A | N/A | N/A    | N/A     | N/A             |     |                |     |
| 1 | 85<br>33<br>54<br>01<br>1.<br>08<br>E<br>+0<br>8 | 85<br>33<br>54<br>01<br>1.<br>08<br>E<br>+0<br>8 | 85<br>34<br>30<br>42<br>1.<br>08<br>E<br>+0<br>8 | 85<br>34<br>30<br>42<br>1.<br>08<br>E<br>+0<br>8 | D<br>E<br>L | 7<br>6<br>3<br>7           | B<br>R<br>C<br>1<br>6 | 1 | 1 | MM<br>EJ | N/<br>A                 | N/A                                               | N<br>/<br>A | N/<br>A | N/A | N/A    | N/A     | N/A             |     |                |     |
| 2 | 1.<br>08<br>E<br>+0<br>8                         | 1.<br>08<br>E<br>+0<br>8                         | 1.<br>08<br>E<br>+0<br>8                         | 1.<br>08<br>E<br>+0<br>8                         | D<br>E<br>L | 1<br>9<br>6<br>1<br>5      | B<br>R<br>C<br>1<br>6 | 1 | 1 | MM<br>EJ | N/<br>A                 | N/A                                               | N<br>/<br>A | N/<br>A | N/A | N/A    | N/A     | N/A             |     |                |     |
| 1 | 31<br>57<br>03<br>21                             | 31<br>57<br>03<br>21                             | 31<br>57<br>27<br>42                             | 31<br>57<br>27<br>42                             | D<br>E<br>L | 2<br>4<br>2<br>1           | B<br>R<br>C<br>1<br>6 | 1 | 1 | NH<br>EJ | R<br>Y<br>R3            | 000<br>892<br>32                                  | 1           | 1       | 2   | intron | RYR3    | ENST00000389232 | 1   | intron2        | N/A |
| 5 | 84<br>90<br>51<br>45                             | 84<br>90<br>51<br>45                             | 84<br>90<br>55<br>35                             | 84<br>90<br>55<br>35                             | D<br>E<br>L | 3<br>8<br>1<br>9           | B<br>R<br>C<br>1<br>6 | 1 | 1 | NH<br>EJ | N/<br>A                 | N/A                                               | N<br>/<br>A | N/<br>A | N/A | N/A    | N/A     | N/A             | N/A | N/A            | N/A |
| 1 | 22<br>98<br>37<br>69                             | 22<br>98<br>37<br>69                             | 22<br>98<br>63<br>96                             | 22<br>98<br>63<br>96                             | D<br>E<br>L | 2<br>6<br>2<br>6           | B<br>R<br>C<br>1<br>6 | 1 | 1 | NH<br>EJ | N/<br>A                 | N/A                                               | N<br>/<br>A | N/<br>A | N/A | N/A    | N/A     | N/A             | N/A | N/A            | N/A |
| 1 | 2.<br>11<br>E<br>+0<br>8                         | 2.<br>11<br>E<br>+0<br>8                         | 2.<br>11<br>E<br>+0<br>8                         | 2.<br>11<br>E<br>+0<br>8                         | D<br>E<br>L | 4<br>2<br>9<br>1<br>8      | B<br>R<br>C<br>1<br>6 | 1 | 1 | NH<br>EJ | R<br>P<br>S6<br>K<br>C1 | 000<br>003<br>659<br>60                           | 1           | 1       | 10  | intron | RPS6KC1 | ENST00000366960 | 1   | cds_exon1<br>0 | N/A |
| 1 | 1.<br>17<br>E<br>+0<br>8                         | 1.<br>17<br>E<br>+0<br>8                         | 1.<br>17<br>E<br>+0<br>8                         | 1.<br>17<br>E<br>+0<br>8                         | D<br>E<br>L | 1<br>3<br>6<br>1<br>0      | B<br>R<br>C<br>1<br>6 | 1 | 1 | MM<br>EJ | N/<br>A                 | N/A                                               | N<br>/<br>A | N/<br>A | N/A | N/A    | N/A     | N/A             | N/A | N/A            | N/A |
| 3 | 1.<br>69<br>E<br>+0<br>8                         | 1.<br>69<br>E<br>+0<br>8                         | 1.<br>69<br>E<br>+0<br>8                         | 1.<br>69<br>E<br>+0<br>8                         | D<br>E<br>L | 2<br>4<br>5<br>1<br>5      | B<br>R<br>C<br>1<br>6 | 1 | 1 | NH<br>EJ | W<br>D<br>R4<br>9       | 000<br>003<br>083<br>78                           | -           | 1       | 5   | intron | WDR49   | ENST00000308378 | -1  | intron5        | N/A |
| 2 | 80<br>83<br>52<br>24                             | 80<br>83<br>52<br>24                             | 80<br>84<br>21<br>68                             | 80<br>84<br>21<br>68                             | D<br>E<br>L | 6<br>9<br>4<br>1<br>6      | B<br>R<br>C<br>1<br>6 | 1 | 1 | MM<br>EJ | N/<br>A                 | N/A                                               | N<br>/<br>A | N/<br>A | N/A | N/A    | N/A     | N/A             | N/A | N/A            | N/A |
| 4 | 79<br>83<br>06<br>53                             | 79<br>83<br>06<br>53                             | 79<br>83<br>15<br>76                             | 79<br>83<br>15<br>76                             | D<br>E<br>L | 9<br>2<br>1<br>3           | B<br>R<br>C<br>1<br>6 | 1 | 1 | NH<br>EJ | N/<br>A                 | N/A                                               | N<br>/<br>A | N/<br>A | N/A | N/A    | N/A     | N/A             | N/A | N/A            | N/A |
| 4 | 1.<br>64<br>E<br>+0<br>8                         | 1.<br>64<br>E<br>+0<br>8                         | 1.<br>64<br>E<br>+0<br>8                         | 1.<br>64<br>E<br>+0<br>8                         | D<br>E<br>L | 2<br>9<br>2<br>1<br>4      | B<br>R<br>C<br>1<br>6 | 1 | 1 | NH<br>EJ | N/<br>A                 | N/A                                               | N<br>/<br>A | N/<br>A | N/A | N/A    | N/A     | N/A             | N/A | N/A            | N/A |
| 1 | 2.<br>18<br>E<br>+0<br>8                         | 2.<br>18<br>E<br>+0<br>8                         | 2.<br>18<br>E<br>+0<br>8                         | 2.<br>18<br>E<br>+0<br>8                         | D<br>E<br>L | 2<br>9<br>2<br>1<br>0      | B<br>R<br>C<br>1<br>6 | 1 | 1 | NH<br>EJ | N/<br>A                 | N/A                                               | N<br>/<br>A | N/<br>A | N/A | N/A    | N/A     | N/A             | N/A | N/A            | N/A |
| 8 | 68<br>69<br>39<br>83<br>32<br>45                 | 68<br>69<br>39<br>83<br>32<br>45                 | 68<br>82<br>22<br>83<br>32<br>57                 | 68<br>82<br>22<br>83<br>32<br>57                 | D<br>E<br>L | 1<br>2<br>1<br>6<br>1<br>2 | B<br>R<br>C<br>1<br>6 | 1 | 1 | MM<br>EJ | C<br>P<br>A6            | 000<br>002<br>977<br>70<br>EN<br>ST<br>000<br>002 | -           | 1       | 2   | intron | CPA6    | ENST00000297770 | -1  | intron2        | N/A |
| X | 01<br>01                                         | X<br>51<br>51                                    | 01<br>51<br>51                                   | 01<br>51<br>51                                   | D<br>E<br>L | 1<br>1<br>1<br>1           | B<br>R<br>C<br>1<br>6 | 1 | 1 | NH<br>EJ | R<br>P<br>S6<br>K       | 000<br>002                                        | -           | 1       | 1   | intron | RPS6KA6 | ENST00000262752 | -1  | intron1        | N/A |



|   |                          |                          |   |                          |                          |             |                  |             |   |   |          |                                 |                                     |         |                       |          |                 |     |         |     |
|---|--------------------------|--------------------------|---|--------------------------|--------------------------|-------------|------------------|-------------|---|---|----------|---------------------------------|-------------------------------------|---------|-----------------------|----------|-----------------|-----|---------|-----|
| 7 | 35<br>63<br>98<br>03     | 35<br>63<br>98<br>03     | 7 | 35<br>64<br>46<br>89     | 35<br>64<br>46<br>89     | D<br>E<br>L | 4<br>8<br>5<br>6 | B<br>R<br>C | 1 | 1 | NH<br>EJ | H<br>E<br>R<br>P<br>U<br>D<br>2 | EN<br>ST<br>000<br>003<br>960<br>81 | -       | utr<br>_e<br>xo<br>n8 | HERPUD2  | ENST00000396081 | -1  | intron4 | N/A |
| 1 | 1.<br>24<br>E<br>+0<br>8 | 1.<br>24<br>E<br>+0<br>8 | 1 | 1.<br>24<br>E<br>+0<br>8 | 1.<br>24<br>E<br>+0<br>8 | D<br>E<br>L | 6<br>6<br>7<br>6 | B<br>R<br>C | 1 | 1 | MM<br>EJ | M<br>M<br>13<br>2B              | EN<br>ST<br>000<br>002<br>993<br>08 | 1       | intr<br>on<br>1       | TMEM132B | ENST00000299308 | 1   | intron1 | N/A |
| 1 | 57<br>58<br>51<br>67     | 57<br>58<br>51<br>67     | 1 | 57<br>59<br>11<br>12     | 57<br>59<br>11<br>12     | D<br>E<br>L | 5<br>9<br>4<br>5 | B<br>R<br>C | 1 | 1 | NH<br>EJ | N/<br>A                         | N/<br>A                             | N/<br>A | N/<br>A               | N/A      | N/A             | N/A | N/A     | N/A |
| 7 | 68<br>29<br>86<br>00     | 68<br>29<br>86<br>00     | 7 | 68<br>30<br>31<br>25     | 68<br>30<br>31<br>25     | D<br>E<br>L | 4<br>5<br>2<br>5 | B<br>R<br>C | 1 | 1 | NH<br>EJ | N/<br>A                         | N/<br>A                             | N/<br>A | N/<br>A               | N/A      | N/A             | N/A | N/A     | N/A |
| 3 | 1.<br>69<br>E<br>+0<br>8 | 1.<br>69<br>E<br>+0<br>8 | 3 | 1.<br>69<br>E<br>+0<br>8 | 1.<br>69<br>E<br>+0<br>8 | D<br>E<br>L | 6<br>2<br>1<br>5 | B<br>R<br>C | 1 | 1 | MM<br>EJ | W<br>R<br>D<br>R4<br>9          | EN<br>ST<br>000<br>003<br>083<br>78 | -       | intr<br>on<br>0       | WDR49    | ENST00000308378 | -1  | intron0 | N/A |
| 7 | 1.<br>32<br>E<br>+0<br>8 | 1.<br>32<br>E<br>+0<br>8 | 7 | 1.<br>32<br>E<br>+0<br>8 | 1.<br>32<br>E<br>+0<br>8 | D<br>E<br>L | 4<br>3<br>5<br>4 | B<br>R<br>C | 1 | 1 | NH<br>EJ | C<br>H<br>C<br>D3               | EN<br>ST<br>000<br>002<br>625<br>70 | -       | intr<br>on<br>6       | CHCHD3   | ENST00000262570 | -1  | intron6 | N/A |
| 2 | 2.<br>01<br>E<br>+0<br>8 | 2.<br>01<br>E<br>+0<br>8 | 2 | 2.<br>01<br>E<br>+0<br>8 | 2.<br>01<br>E<br>+0<br>8 | D<br>E<br>L | 4<br>7<br>2<br>2 | B<br>R<br>C | 1 | 1 | MM<br>EJ | N/<br>A                         | N/<br>A                             | N/<br>A | N/<br>A               | N/A      | N/A             | N/A | N/A     | N/A |
| 1 | 86<br>50<br>30<br>89     | 86<br>50<br>30<br>89     | 1 | 86<br>50<br>69<br>69     | 86<br>50<br>69<br>69     | D<br>E<br>L | 3<br>8<br>7<br>5 | B<br>R<br>C | 1 | 1 | MM<br>EJ | N/<br>A                         | N/<br>A                             | N/<br>A | N/<br>A               | N/A      | N/A             | N/A | N/A     | N/A |
| 4 | 86<br>03<br>51<br>11     | 86<br>03<br>51<br>11     | 4 | 86<br>03<br>78<br>29     | 86<br>03<br>78<br>29     | D<br>E<br>L | 2<br>7<br>1<br>8 | B<br>R<br>C | 1 | 1 | NH<br>EJ | W<br>D<br>F<br>Y<br>3           | EN<br>ST<br>000<br>003<br>223<br>66 | -       | intr<br>on<br>0       | WDFY3    | ENST00000322366 | -1  | intron0 | N/A |
| 4 | 18<br>13<br>51<br>59     | 18<br>13<br>51<br>59     | 4 | 18<br>13<br>88<br>46     | 18<br>13<br>88<br>46     | D<br>E<br>L | 3<br>6<br>8<br>7 | B<br>R<br>C | 1 | 1 | NH<br>EJ | N/<br>A                         | N/<br>A                             | N/<br>A | N/<br>A               | N/A      | N/A             | N/A | N/A     | N/A |
| 7 | 1.<br>59<br>E<br>+0<br>8 | 1.<br>59<br>E<br>+0<br>8 | 7 | 1.<br>59<br>E<br>+0<br>8 | 1.<br>59<br>E<br>+0<br>8 | D<br>E<br>L | 2<br>2<br>0<br>5 | B<br>R<br>C | 1 | 1 | MM<br>EJ | N/<br>A                         | N/<br>A                             | N/<br>A | N/<br>A               | N/A      | N/A             | N/A | N/A     | N/A |
| 1 | 1.<br>06<br>E<br>+0<br>8 | 1.<br>06<br>E<br>+0<br>8 | 1 | 1.<br>06<br>E<br>+0<br>8 | 1.<br>06<br>E<br>+0<br>8 | D<br>E<br>L | 2<br>2<br>1<br>5 | B<br>R<br>C | 1 | 1 | NH<br>EJ | N/<br>A                         | N/<br>A                             | N/<br>A | N/<br>A               | N/A      | N/A             | N/A | N/A     | N/A |
| 6 | 1.<br>12<br>E<br>+0<br>8 | 1.<br>12<br>E<br>+0<br>8 | 6 | 1.<br>12<br>E<br>+0<br>8 | 1.<br>12<br>E<br>+0<br>8 | D<br>E<br>L | 1<br>5<br>7<br>6 | B<br>R<br>C | 1 | 1 | NH<br>EJ | R<br>E<br>V3<br>L               | EN<br>ST<br>000<br>003<br>688<br>05 | -       | intr<br>on<br>2       | REV3L    | ENST00000368805 | -1  | intron2 | N/A |
| 2 | 28<br>91<br>64<br>80     | 28<br>91<br>64<br>80     | 2 | 28<br>91<br>67<br>60     | 28<br>91<br>67<br>60     | D<br>E<br>L | 2<br>2<br>8<br>1 | B<br>R<br>C | 1 | 1 | NH<br>EJ | N/<br>A                         | N/<br>A                             | N/<br>A | N/<br>A               | N/A      | N/A             | N/A | N/A     | N/A |

|   |                            |                            |   |                            |                            |             |                  |                       |   |   |          |                         |                                           |             |             |     |        |         |                 |     |          |              |
|---|----------------------------|----------------------------|---|----------------------------|----------------------------|-------------|------------------|-----------------------|---|---|----------|-------------------------|-------------------------------------------|-------------|-------------|-----|--------|---------|-----------------|-----|----------|--------------|
| 8 | 24<br>62<br>97<br>73       | 24<br>62<br>97<br>73       | 8 | 24<br>63<br>36<br>31       | 24<br>63<br>36<br>31       | D<br>E<br>L | 3<br>8<br>5<br>8 | B<br>R<br>C<br>1<br>6 | 1 | 1 | NH<br>EJ | N/<br>A                 | N/A<br>EN<br>ST<br>000<br>003<br>704      | N<br>/<br>A | N<br>/<br>A | N/A | N/A    | N/A     | N/A             |     |          |              |
| 1 | 1.<br>02<br>E<br>+0<br>8   | 1.<br>02<br>E<br>+0<br>8   | 1 | 1.<br>02<br>E<br>+0<br>8   | 1.<br>02<br>E<br>+0<br>8   | D<br>E<br>L | 3<br>0<br>7<br>2 | B<br>R<br>C<br>1<br>6 | 1 | 1 | NH<br>EJ | E<br>RL<br>IN<br>1      | 10<br>EN<br>ST<br>000<br>003<br>704       | -           | 1           | 7   | intron | ERLIN1  | ENST00000370410 | -1  | intron6  | N/A          |
| 1 | 1.<br>44<br>E<br>+0<br>8   | 1.<br>44<br>E<br>+0<br>8   | 1 | 1.<br>44<br>E<br>+0<br>8   | 1.<br>44<br>E<br>+0<br>8   | D<br>E<br>L | 5<br>7<br>1<br>6 | B<br>R<br>C<br>1<br>6 | 1 | 1 | NH<br>EJ | P<br>O<br>LR<br>3C      | 10<br>EN<br>ST<br>000<br>003<br>341<br>63 | -           | 1           | 4   | intron | POLR3C  | ENST00000334163 | -1  | intron3  | N/A          |
| 1 | 2.<br>28<br>E<br>+0<br>8   | 2.<br>28<br>E<br>+0<br>8   | 1 | 2.<br>28<br>E<br>+0<br>8   | 2.<br>28<br>E<br>+0<br>8   | D<br>E<br>L | 4<br>1<br>5<br>3 | B<br>R<br>C<br>1<br>6 | 1 | 1 | MM<br>EJ | N/<br>A                 | N/A                                       | N<br>/<br>A | N<br>/<br>A | N/A | N/A    | N/A     | N/A             | N/A | N/A      | N/A          |
| 8 | 64<br>31<br>97<br>18<br>1. | 64<br>31<br>97<br>18<br>1. | 8 | 64<br>32<br>26<br>18<br>1. | 64<br>32<br>26<br>18<br>1. | D<br>E<br>L | 2<br>8<br>9<br>6 | B<br>R<br>C<br>1<br>6 | 1 | 1 | NH<br>EJ | N/<br>A                 | N/A                                       | N<br>/<br>A | N<br>/<br>A | N/A | N/A    | N/A     | N/A             | N/A | N/A      | N/A          |
| 1 | 94<br>E<br>+0<br>8         | 94<br>E<br>+0<br>8         | 1 | 94<br>E<br>+0<br>8         | 94<br>E<br>+0<br>8         | D<br>E<br>L | 3<br>9<br>1<br>6 | B<br>R<br>C<br>1<br>6 | 1 | 1 | NH<br>EJ | N/<br>A                 | N/A                                       | N<br>/<br>A | N<br>/<br>A | N/A | N/A    | N/A     | N/A             | N/A | N/A      | N/A          |
| 1 | 22<br>99<br>95<br>61       | 22<br>99<br>95<br>61       | 1 | 23<br>00<br>49<br>47       | 23<br>00<br>49<br>47       | D<br>E<br>L | 5<br>3<br>8<br>6 | B<br>R<br>C<br>1<br>6 | 1 | 1 | NH<br>EJ | C<br>H<br>S<br>T<br>9   | 000<br>002<br>842<br>24                   | -           | 1           | 0   | intron | CHST9   | ENST00000284224 | -1  | intron0  | N/A          |
| 1 | 80<br>43<br>16<br>04       | 80<br>43<br>16<br>04       | 1 | 80<br>43<br>21<br>13       | 80<br>43<br>21<br>13       | D<br>E<br>L | 5<br>0<br>1<br>9 | B<br>R<br>C<br>1<br>6 | 1 | 1 | NH<br>EJ | N/<br>A                 | N/A                                       | N<br>/<br>A | N<br>/<br>A | N/A | N/A    | N/A     | N/A             | N/A | N/A      | N/A          |
| 3 | 1.<br>91<br>E<br>+0<br>8   | 1.<br>91<br>E<br>+0<br>8   | 3 | 1.<br>91<br>E<br>+0<br>8   | 1.<br>91<br>E<br>+0<br>8   | D<br>E<br>L | 2<br>5<br>4<br>0 | B<br>R<br>C<br>1<br>6 | 1 | 1 | NH<br>EJ | LE<br>P<br>R<br>EL<br>1 | 000<br>003<br>193<br>32                   | -           | 1           | 1   | intron | LEPREL1 | ENST00000319332 | -1  | intron1  | N/A          |
| 1 | 75<br>14<br>10<br>68       | 75<br>14<br>10<br>68       | 1 | 75<br>39<br>53<br>93       | 75<br>39<br>53<br>93       | D<br>E<br>L | 3<br>2<br>2<br>6 | B<br>R<br>C<br>1<br>6 | 1 | 1 | MM<br>EJ | FL<br>V<br>C<br>R2      | 000<br>002<br>386<br>67                   | -           | 1           | 1   | intron | TTL5    | ENST00000393826 | 1   | intron27 | C14orf1 TTL5 |
| 4 | 1.<br>54<br>E<br>+0<br>8   | 1.<br>54<br>E<br>+0<br>8   | 4 | 1.<br>54<br>E<br>+0<br>8   | 1.<br>54<br>E<br>+0<br>8   | D<br>E<br>L | 7<br>7<br>8<br>7 | B<br>R<br>C<br>1<br>6 | 1 | 1 | MM<br>EJ | N/<br>A                 | N/A                                       | N<br>/<br>A | N<br>/<br>A | N/A | N/A    | N/A     | N/A             | N/A | N/A      | N/A          |
| 3 | 1.<br>12<br>E<br>+0<br>8   | 1.<br>12<br>E<br>+0<br>8   | 3 | 1.<br>12<br>E<br>+0<br>8   | 1.<br>12<br>E<br>+0<br>8   | D<br>E<br>L | 3<br>6<br>1<br>3 | B<br>R<br>C<br>1<br>6 | 1 | 1 | NH<br>EJ | N/<br>A                 | N/A                                       | N<br>/<br>A | N<br>/<br>A | N/A | N/A    | N/A     | N/A             | N/A | N/A      | N/A          |
| 2 | 79<br>94<br>91<br>21       | 79<br>94<br>91<br>21       | 2 | 79<br>94<br>95<br>88       | 79<br>94<br>95<br>88       | D<br>E<br>L | 4<br>4<br>1<br>6 | B<br>R<br>C<br>1<br>6 | 1 | 1 | MM<br>EJ | C<br>T<br>N<br>A2       | 000<br>004<br>095<br>36                   | -           | 1           | 3   | intron | CTNNA2  | ENST00000409536 | 1   | intron3  | N/A          |
| 1 | 76<br>39<br>32<br>0        | 76<br>39<br>32<br>0        | 1 | 76<br>39<br>73<br>72       | 76<br>39<br>73<br>72       | D<br>E<br>L | 4<br>1<br>4<br>0 | B<br>R<br>C<br>1<br>6 | 1 | 1 | NH<br>EJ | M<br>Y<br>S<br>T4       | 000<br>003<br>727<br>25                   | -           | 1           | 2   | intron | MYST4   | ENST00000372725 | 1   | intron2  | N/A          |

|   |              |              |              |              |      |     |   |   |       |               |                 |     |            |     |     |     |     |     |
|---|--------------|--------------|--------------|--------------|------|-----|---|---|-------|---------------|-----------------|-----|------------|-----|-----|-----|-----|-----|
| 1 | 2.1E+08      | 2.1E+08      | 2.1E+08      | 2.1E+08      | DELL | 158 | 1 | 1 | NH EJ | N/A           | N/A             | N/A | N/A        | N/A | N/A | N/A | N/A | N/A |
| 4 | 25491.09E+08 | 25491.09E+08 | 25491.09E+08 | 25491.09E+08 | DELL | 863 | 1 | 1 | MM EJ | N/A           | N/A             | N/A | N/A        | N/A | N/A | N/A | N/A | N/A |
| 7 | 1103.72E+08  | 1103.72E+08  | 1103.72E+08  | 1103.72E+08  | DELL | 542 | 1 | 1 | MM EJ | N/A           | N/A             | N/A | N/A        | N/A | N/A | N/A | N/A | N/A |
| 5 | 9103.72E+08  | 9103.72E+08  | 9103.72E+08  | 9103.72E+08  | DELL | 863 | 1 | 1 | NH EJ | NTN0000359640 | ENST00000359640 | -1  | intron1    | N/A | N/A | N/A | N/A | N/A |
| 7 | 1.41E+08     | 1.41E+08     | 1.41E+08     | 1.41E+08     | DELL | 238 | 1 | 1 | MM EJ | KIAA1147      | ENST00000297761 | -1  | intron3    | N/A | N/A | N/A | N/A | N/A |
| 1 | 9763.03E+06  | 9763.03E+06  | 9763.03E+06  | 9763.03E+06  | DELL | 394 | 1 | 1 | NH EJ | APAF1         | ENST00000339433 | 1   | intron20   | N/A | N/A | N/A | N/A | N/A |
| 1 | 1.01E+08     | 1.01E+08     | 1.01E+08     | 1.01E+08     | DELL | 281 | 1 | 1 | NH EJ | KIAA1377      | ENST00000263468 | 1   | intron4    | N/A | N/A | N/A | N/A | N/A |
| 7 | 2469.25E+19  | 2469.25E+19  | 2469.25E+19  | 2469.25E+19  | DELL | 196 | 1 | 1 | MM EJ | MPP6          | ENST00000222644 | 1   | cds_exon10 | N/A | N/A | N/A | N/A | N/A |
| 1 | 5548.77E+63  | 5548.77E+63  | 5548.77E+63  | 5548.77E+63  | DELL | 666 | 1 | 1 | NH EJ | CCBE1         | ENST00000333570 | -1  | intron2    | N/A | N/A | N/A | N/A | N/A |
| 1 | 8537.42E+82  | 8537.42E+82  | 8537.42E+82  | 8537.42E+82  | DELL | 666 | 1 | 1 | MM EJ | N/A           | N/A             | N/A | N/A        | N/A | N/A | N/A | N/A | N/A |
| 1 | 2622.41E+49  | 2622.41E+49  | 2622.41E+49  | 2622.41E+49  | DELL | 566 | 1 | 1 | MM EJ | N/A           | N/A             | N/A | N/A        | N/A | N/A | N/A | N/A | N/A |
| 3 | 6953.81E+09  | 6953.81E+09  | 6953.81E+09  | 6953.81E+09  | DELL | 866 | 1 | 1 | NH EJ | N/A           | N/A             | N/A | N/A        | N/A | N/A | N/A | N/A | N/A |
| 2 | 1.45E+08     | 1.45E+08     | 1.45E+08     | 1.45E+08     | DELL | 496 | 1 | 1 | NH EJ | N/A           | N/A             | N/A | N/A        | N/A | N/A | N/A | N/A | N/A |
| 1 | 7889.63E+23  | 7889.63E+23  | 7889.63E+23  | 7889.63E+23  | DELL | 256 | 1 | 1 | NH EJ | KCNMA1        | ENST00000372437 | -1  | intron1    | N/A | N/A | N/A | N/A | N/A |







|   |                          |                          |   |                          |                          |             |                  |   |   |          |                                             |                                     |             |                  |          |                 |     |          |     |     |
|---|--------------------------|--------------------------|---|--------------------------|--------------------------|-------------|------------------|---|---|----------|---------------------------------------------|-------------------------------------|-------------|------------------|----------|-----------------|-----|----------|-----|-----|
| 2 | 1.<br>15<br>E<br>+0<br>8 | 1.<br>15<br>E<br>+0<br>8 | 2 | 1.<br>15<br>E<br>+0<br>8 | 1.<br>15<br>E<br>+0<br>8 | D<br>E<br>L | 6<br>4<br>1<br>6 | 1 | 1 | NH<br>EJ | N/<br>A<br>R<br>A<br>B<br>G<br>A<br>P1<br>L | N/A                                 | N<br>/<br>A | N/<br>A          | N/A      | N/A             | N/A | N/A      | N/A | N/A |
| 1 | 1.<br>73<br>E<br>+0<br>8 | 1.<br>73<br>E<br>+0<br>8 | 1 | 1.<br>73<br>E<br>+0<br>8 | 1.<br>73<br>E<br>+0<br>8 | D<br>E<br>L | 5<br>0<br>1<br>6 | 1 | 1 | MM<br>EJ | N/<br>A<br>P1<br>L                          | EN<br>ST<br>000<br>004<br>077<br>35 | 1           | intr<br>on<br>16 | RABGAP1L | ENST00000407735 | 1   | intron16 | N/A |     |
| 1 | 64<br>20<br>60<br>89     | 64<br>20<br>60<br>89     | 1 | 64<br>20<br>81<br>17     | 64<br>20<br>81<br>17     | D<br>E<br>L | 2<br>0<br>2<br>7 | 1 | 1 | NH<br>EJ | N/<br>A                                     | N/A                                 | N<br>/<br>A | N/<br>A          | N/A      | N/A             | N/A | N/A      | N/A |     |
| 1 | 67<br>98<br>34<br>53     | 67<br>98<br>34<br>53     | 1 | 67<br>98<br>48<br>18     | 67<br>98<br>48<br>18     | D<br>E<br>L | 1<br>3<br>6      | 1 | 1 | MM<br>EJ | N/<br>A                                     | N/A                                 | N<br>/<br>A | N/<br>A          | N/A      | N/A             | N/A | N/A      | N/A |     |
| 3 | 19<br>E<br>+0<br>8       | 19<br>E<br>+0<br>8       | 3 | 19<br>E<br>+0<br>8       | 19<br>E<br>+0<br>8       | D<br>E<br>L | 1<br>5<br>0<br>8 | 1 | 1 | MM<br>EJ | N/<br>A                                     | N/A                                 | N<br>/<br>A | N/<br>A          | N/A      | N/A             | N/A | N/A      | N/A |     |
| 1 | 55<br>E<br>+0<br>8       | 55<br>E<br>+0<br>8       | 1 | 55<br>E<br>+0<br>8       | 55<br>E<br>+0<br>8       | D<br>E<br>L | 2<br>0<br>7<br>3 | 1 | 1 | MM<br>EJ | N/<br>A                                     | N/A                                 | N<br>/<br>A | N/<br>A          | N/A      | N/A             | N/A | N/A      | N/A |     |
| 1 | 14<br>60<br>65           | 14<br>60<br>65           | 1 | 14<br>60<br>70           | 14<br>60<br>70           | D<br>E<br>L | 4<br>0<br>4<br>6 | 1 | 1 | MM<br>EJ | SL<br>C4<br>3A<br>2                         | EN<br>ST<br>000<br>003<br>013<br>35 | 1           | intr<br>on<br>4  | SLC43A2  | ENST00000301335 | -1  | intron3  | N/A |     |
| 9 | 8<br>E<br>+0<br>8        | 8<br>E<br>+0<br>8        | 9 | 8<br>E<br>+0<br>8        | 8<br>E<br>+0<br>8        | D<br>E<br>L | 4<br>4<br>6<br>6 | 1 | 1 | MM<br>EJ | N/<br>A                                     | N/A                                 | N<br>/<br>A | N/<br>A          | N/A      | N/A             | N/A | N/A      | N/A |     |
| 8 | 16<br>E<br>+0<br>8       | 16<br>E<br>+0<br>8       | 8 | 16<br>E<br>+0<br>8       | 16<br>E<br>+0<br>8       | D<br>E<br>L | 1<br>0<br>1<br>6 | 1 | 1 | NH<br>EJ | N/<br>A                                     | N/A                                 | N<br>/<br>A | N/<br>A          | N/A      | N/A             | N/A | N/A      | N/A |     |
| 2 | 18<br>70<br>88           | 18<br>70<br>88           | 2 | 18<br>71<br>02           | 18<br>71<br>02           | D<br>E<br>L | 1<br>4<br>1<br>7 | 1 | 1 | MM<br>EJ | N/<br>A                                     | N/A                                 | N<br>/<br>A | N/<br>A          | N/A      | N/A             | N/A | N/A      | N/A |     |
| 1 | 31                       | 31                       | 1 | 50                       | 50                       | D<br>E<br>L | 7<br>6           | 1 | 1 | MM<br>EJ | N/<br>A                                     | N/A                                 | N<br>/<br>A | N/<br>A          | N/A      | N/A             | N/A | N/A      | N/A |     |
| 8 | 80<br>73<br>90<br>70     | 80<br>73<br>90<br>70     | 8 | 80<br>73<br>92<br>73     | 80<br>73<br>92<br>73     | D<br>E<br>L | 2<br>0<br>1<br>6 | 1 | 1 | MM<br>EJ | ST<br>M<br>N2                               | EN<br>ST<br>000<br>002<br>208<br>76 | 1           | intr<br>on<br>4  | STMN2    | ENST00000220876 | 1   | intron4  | N/A |     |
| 8 | 35<br>E<br>+0<br>8       | 35<br>E<br>+0<br>8       | 8 | 35<br>E<br>+0<br>8       | 35<br>E<br>+0<br>8       | D<br>E<br>L | 3<br>3<br>1<br>5 | 1 | 1 | MM<br>EJ | N/<br>A                                     | N/A                                 | N<br>/<br>A | N/<br>A          | N/A      | N/A             | N/A | N/A      | N/A |     |
| 1 | 70<br>76<br>70           | 70<br>76<br>70           | 1 | 70<br>78<br>04           | 70<br>78<br>04           | D<br>E<br>L | 1<br>3<br>3<br>9 | 1 | 1 | NH<br>EJ | LA<br>M<br>A1                               | EN<br>ST<br>000<br>003<br>896<br>58 | 1           | intr<br>on<br>1  | LAMA1    | ENST00000389658 | -1  | intron1  | N/A |     |
| 2 | 48<br>25<br>49           | 48<br>25<br>49           | 2 | 21<br>13<br>49           | 21<br>13<br>49           | D<br>E<br>L | 8<br>7<br>1<br>5 | 1 | 1 | NH<br>EJ | N/<br>A<br>F<br>S                           | N/A<br>EN<br>ST<br>000              | N<br>/<br>A | N/<br>A          | N/A      | N/A             | N/A | N/A      | N/A |     |
| 2 | 20<br>93                 | 20<br>93                 | 2 | 21<br>08                 | 21<br>08                 | D<br>E<br>L | 1<br>4<br>C      | 1 | 1 | NH<br>EJ | H<br>R                                      | EN<br>ST<br>000                     | 1           | intr<br>on<br>1  | FSHR     | ENST00000346173 | -1  | intron1  | N/A |     |



|   |                                            |                                            |                                           |                                           |             |                  |                  |                  |    |          |              |                                     |                                     |   |    |            |                 |                 |          |                                                                                                                                        |                                                                                                                                                                                                                                                                                                                                                                                                                                                                                                                                                                                                                                                                                                                                                                                                                                                                                                                                                                                                                                                                                                                                                                          |
|---|--------------------------------------------|--------------------------------------------|-------------------------------------------|-------------------------------------------|-------------|------------------|------------------|------------------|----|----------|--------------|-------------------------------------|-------------------------------------|---|----|------------|-----------------|-----------------|----------|----------------------------------------------------------------------------------------------------------------------------------------|--------------------------------------------------------------------------------------------------------------------------------------------------------------------------------------------------------------------------------------------------------------------------------------------------------------------------------------------------------------------------------------------------------------------------------------------------------------------------------------------------------------------------------------------------------------------------------------------------------------------------------------------------------------------------------------------------------------------------------------------------------------------------------------------------------------------------------------------------------------------------------------------------------------------------------------------------------------------------------------------------------------------------------------------------------------------------------------------------------------------------------------------------------------------------|
| 6 | 1.<br>07<br>E<br>+0<br>8                   | 1.<br>07<br>E<br>+0<br>8                   | 1.<br>07<br>E<br>+0<br>8                  | 1.<br>07<br>E<br>+0<br>8                  | D<br>E<br>L | 2<br>3<br>1<br>6 | B<br>R<br>C<br>C | 1                | 1  | NH<br>EJ | AI<br>M<br>1 | EN<br>ST<br>000<br>003<br>690<br>66 | 1                                   | 1 | 1  | intr<br>on | AIM1            | ENST00000369066 | 1        | cds_exon1                                                                                                                              | N/A                                                                                                                                                                                                                                                                                                                                                                                                                                                                                                                                                                                                                                                                                                                                                                                                                                                                                                                                                                                                                                                                                                                                                                      |
| 2 | 2.<br>08<br>E<br>+0<br>8                   | 2.<br>08<br>E<br>+0<br>8                   | 45<br>45<br>97<br>09<br>00                | 45<br>45<br>97<br>09<br>00                | C<br>T<br>X | N<br>/<br>A      | B<br>R<br>C<br>C | -1               | 1  | MM<br>EJ | N/<br>A      | N/A                                 | N                                   | N | N  | N/A        | N/A             | N/A             | N/A      | N/A                                                                                                                                    |                                                                                                                                                                                                                                                                                                                                                                                                                                                                                                                                                                                                                                                                                                                                                                                                                                                                                                                                                                                                                                                                                                                                                                          |
| 7 | 43<br>71<br>13<br>9                        | 43<br>71<br>13<br>9                        | 1<br>+0<br>8                              | 1<br>+0<br>8                              | E<br>E<br>X | C<br>T<br>X      | N<br>/<br>A      | B<br>R<br>C<br>C | 1  | -1       | MM<br>EJ     | N/<br>A                             | N/A                                 | N | N  | N/A        | N/A             | N/A             | N/A      | N/A                                                                                                                                    |                                                                                                                                                                                                                                                                                                                                                                                                                                                                                                                                                                                                                                                                                                                                                                                                                                                                                                                                                                                                                                                                                                                                                                          |
| 9 | 62<br>46<br>94<br>24                       | 62<br>46<br>94<br>24                       | 1<br>16<br>13                             | 1<br>16<br>13                             | E<br>L      | D<br>E<br>L      | 2<br>1<br>8<br>7 | B<br>R<br>C<br>C | 1  | 1        | MM<br>EJ     | N/<br>A                             | N/A                                 | N | N  | N/A        | N/A             | N/A             | N/A      | N/A                                                                                                                                    |                                                                                                                                                                                                                                                                                                                                                                                                                                                                                                                                                                                                                                                                                                                                                                                                                                                                                                                                                                                                                                                                                                                                                                          |
| 0 | 46<br>15<br>65<br>28                       | 46<br>15<br>65<br>28                       | 2<br>16<br>29                             | 2<br>16<br>29                             | IN<br>V     | IN<br>V          | 1<br>0<br>0<br>7 | B<br>R<br>C<br>C | -1 | 1        | NH<br>EJ     | N/<br>A                             | N/A                                 | N | N  | N/A        | N/A             | N/A             | N/A      | N/A                                                                                                                                    |                                                                                                                                                                                                                                                                                                                                                                                                                                                                                                                                                                                                                                                                                                                                                                                                                                                                                                                                                                                                                                                                                                                                                                          |
| 0 | 51<br>40<br>11<br>01                       | 51<br>40<br>11<br>01                       | 2<br>54<br>14                             | 2<br>54<br>14                             | D<br>L      | D<br>L           | 3<br>3<br>1<br>7 | B<br>R<br>C<br>C | 1  | 1        | NH<br>EJ     | TS<br>H<br>Z2                       | EN<br>ST<br>000<br>003<br>714<br>97 | 1 | 1  | intr<br>on | N/A             | N/A             | N/A      | CASS4 CYP24A1 C20orf107 RPL39P AURKA MC3R C20orf106 C20orf43 PPIAP10 BCAS1 GCNT7 DOK5 PTMAP6 TFAP2C ZNF217 PFDN4 C20orf108 CBLN4 CSTF1 |                                                                                                                                                                                                                                                                                                                                                                                                                                                                                                                                                                                                                                                                                                                                                                                                                                                                                                                                                                                                                                                                                                                                                                          |
| 9 | 61<br>47<br>93<br>77                       | 61<br>47<br>93<br>77                       | 1<br>88<br>72<br>98                       | 1<br>88<br>72<br>98                       | D<br>L      | D<br>L           | 6<br>9<br>1<br>9 | B<br>R<br>C<br>C | 1  | 1        | NH<br>EJ     | ZS<br>C<br>A                        | EN<br>ST<br>000<br>002<br>541<br>65 | - | 0  | intr<br>on | N/A             | N/A             | N/A      | ZNF71 ZNF542 ZFP28 ZNF582 ZNF471 ZNF583 ZNF667 ZNF835 ZNF470                                                                           |                                                                                                                                                                                                                                                                                                                                                                                                                                                                                                                                                                                                                                                                                                                                                                                                                                                                                                                                                                                                                                                                                                                                                                          |
| 5 | 83<br>02<br>30<br>1.<br>25<br>E<br>+0<br>8 | 83<br>02<br>30<br>1.<br>25<br>E<br>+0<br>8 | 1<br>05<br>53<br>1.<br>25<br>E<br>+0<br>8 | 1<br>05<br>53<br>1.<br>25<br>E<br>+0<br>8 | D<br>E<br>L | D<br>E<br>L      | 3<br>1<br>0<br>7 | B<br>R<br>C<br>C | 1  | 1        | MM<br>EJ     | SL<br>C2<br>8A                      | EN<br>ST<br>000<br>002<br>867<br>49 | 1 | 13 | intr<br>on | ENST00000286749 | 1               | intron13 | N/A                                                                                                                                    |                                                                                                                                                                                                                                                                                                                                                                                                                                                                                                                                                                                                                                                                                                                                                                                                                                                                                                                                                                                                                                                                                                                                                                          |
| 1 | 2.<br>37<br>E<br>+0<br>8                   | 2.<br>37<br>E<br>+0<br>8                   | 2.<br>37<br>E<br>+0<br>8                  | 2.<br>37<br>E<br>+0<br>8                  | D<br>E<br>L | D<br>E<br>L      | 7<br>1<br>4      | B<br>R<br>C<br>C | 1  | 1        | MM<br>EJ     | A<br>S<br>B1                        | EN<br>ST<br>000<br>003<br>308<br>42 | - | 1  | intr<br>on | ASB18           | ENST00000330842 | -1       | intron1                                                                                                                                | N/A                                                                                                                                                                                                                                                                                                                                                                                                                                                                                                                                                                                                                                                                                                                                                                                                                                                                                                                                                                                                                                                                                                                                                                      |
| 1 | 99<br>27<br>95<br>22                       | 99<br>27<br>95<br>22                       | 1<br>+0<br>8                              | 1<br>+0<br>8                              | D<br>E<br>L | D<br>E<br>L      | 2<br>0<br>5<br>0 | B<br>R<br>C<br>C | 1  | 1        | MM<br>EJ     | N5                                  | EN<br>ST<br>000<br>002<br>794<br>63 | 1 | 3  | intr<br>on | ARHGEF12        | ENST00000356641 | 1        | intron2                                                                                                                                | N/A<br>PHLDB1 POU2AF1 C11orf87 MCAM FXYD2 AASDHPPT ARHGAP20 TMEM25 SLC37A4 HYOU1 TAGLN ALG9 USP2 KB1BD3 ABCG4 C11orf1 SIK2 GRIA4 CRYAB IL10RA CASP5 PVRL1 FDACB1 POU2F3 DLAT HTR3B C11orf1 KIAA1377 MPZL2 TMEM123 APOA1 ANGPTL5 C11orf65 TRIM29 AMICA1 RPS25F8 DDX6 RDX CCDC84 MMP7 PDZD3 CD3D MMP13 HSPB2 DIXDC1 C10TNF5 FAM55A C11orf34 SLN ARCN1 BUD13 CASP4 OAF SCN2B DPAGT1 APOA5 MMP3 PDGFD REXO2 FXYD6 FAM55D DRD2 LAYN USP28 BIRC2 NPAT ZC3H12C H2AFX MMP10 TTC12 ZBTB16 KDELC2 BTG4 HTR3A DYNC2H1 C11orf60 C11orf52 TRAPPC4 KIAA1826 ATP5L NCAM1 PPIHP1 MMP8 BACE1 THY1 CASP12 PAFAH1B2 MPZL3 CWF19L2 SLC35F2 TMEM133 SCN4B RBM7 BCO2 CD3E RPL23AP64 TRPC6 TMPRSS4 C2CD2L ANKK1 PCSK7 TMPRSS13 TTC36 PPP2R1B CASP1 TIMM8B CARD17 HINFP SIDT2 CUL5 NNMT CCDC153 C11orf70 FDX1 DSCAML1 PTS MMP1 uc001ppy.1 RNF26 ACAT1 FOXR1 BCL9L C11orf92 DCUN1D5 SDHD DDI1 YAP1 MMP12 VPS11 CARD16 MLL MMP27 GUCY1A2 ELMOD1 CARD18 TREH TMPRSS5 ZNF259 FAM55B CBL APOC3 ZW10 NLRX1 UBE4A UPK2 ENSG00000216295 HMBS MMP20 ENSG00000165895 PGR IL18 DDX10 C11orf88 TMEM136 PIH1D2 MFRP C11orf57 EXPH5 RAB39 ALKBH8 CEP164 BIRC3 CADM1 APOA4 TEX12 CD3G ATM CXCR5 RNF214 C11orf53 |

|        |                                                |                                                |             |                                                |                                                |             |                       |                       |    |    |          |                             |                                          |                  |                  |                 |                       |                 |                 |           |                |                                                                                                                                                                                                                                                                                           |
|--------|------------------------------------------------|------------------------------------------------|-------------|------------------------------------------------|------------------------------------------------|-------------|-----------------------|-----------------------|----|----|----------|-----------------------------|------------------------------------------|------------------|------------------|-----------------|-----------------------|-----------------|-----------------|-----------|----------------|-------------------------------------------------------------------------------------------------------------------------------------------------------------------------------------------------------------------------------------------------------------------------------------------|
| 8      | 41<br>96<br>21<br>61                           | 41<br>96<br>21<br>61                           | 1<br>9      | 39<br>60<br>04<br>3                            | 39<br>60<br>04<br>3                            | C<br>T<br>X | N<br>/<br>A           | B<br>R<br>C<br>1<br>7 | -1 | 1  | NH<br>EJ | M<br>Y<br>S<br>T<br>3       | EN<br>S<br>T<br>000<br>002<br>657<br>13  | -                | 1                | intr<br>on<br>2 | PIAS4                 | ENST00000262971 | 1               | intron1   | N/A            |                                                                                                                                                                                                                                                                                           |
| 1<br>9 | 56<br>48<br>76<br>32                           | 56<br>48<br>76<br>32                           | 2<br>0      | 54<br>68<br>77<br>51                           | 54<br>68<br>77<br>51                           | C<br>T<br>X | N<br>/<br>A           | B<br>R<br>C<br>1<br>7 | -1 | 1  | NH<br>EJ | N/<br>A                     | N/A<br>EN<br>S<br>T<br>000<br>003<br>081 | N<br>/<br>A<br>A | N<br>/<br>A<br>A | N/A             | N/A                   | N/A             | N/A             | N/A       |                |                                                                                                                                                                                                                                                                                           |
| 1<br>9 | 62<br>99<br>61<br>77                           | 62<br>99<br>61<br>77                           | 2<br>0      | 36<br>28<br>89<br>80                           | 36<br>28<br>89<br>80                           | C<br>T<br>X | N<br>/<br>A           | B<br>R<br>C<br>1<br>7 | 1  | 1  | NH<br>EJ | Z<br>N<br>C<br>F5<br>86     | EN<br>S<br>T<br>000<br>003<br>081<br>37  | 1                | 2                | intr<br>on      | KIAA1755              | ENST00000279024 | -1              | cds_exon6 | N/A            |                                                                                                                                                                                                                                                                                           |
| 1<br>9 | 61<br>98<br>67<br>36                           | 61<br>98<br>67<br>36                           | 2<br>0      | 44<br>37<br>79<br>96                           | 44<br>37<br>79<br>96                           | C<br>T<br>X | N<br>/<br>A           | B<br>R<br>C<br>1<br>7 | 1  | 1  | NH<br>EJ | P<br>E<br>G<br>S3A          | EN<br>S<br>T<br>000<br>003<br>917<br>08  | -                | 1                | 6               | intr<br>on            | N/A             | N/A             | N/A       | N/A            |                                                                                                                                                                                                                                                                                           |
| 1<br>9 | 57<br>99<br>36<br>25                           | 57<br>99<br>36<br>25                           | 2<br>0      | 43<br>60<br>60<br>68                           | 43<br>33<br>60<br>68                           | C<br>T<br>X | N<br>/<br>A           | B<br>R<br>C<br>1<br>7 | 1  | 1  | NH<br>EJ | Z<br>N<br>C<br>F2<br>8      | EN<br>S<br>T<br>000<br>003<br>602<br>72  | -                | 1                | 1               | utr<br>_e<br>xo<br>n1 | N/A             | N/A             | N/A       | N/A            |                                                                                                                                                                                                                                                                                           |
| 1<br>9 | 54<br>28<br>43<br>72                           | 54<br>28<br>43<br>72                           | 2<br>0      | 51<br>76<br>64<br>11                           | 51<br>76<br>64<br>11                           | C<br>T<br>X | N<br>/<br>A           | B<br>R<br>C<br>1<br>7 | -1 | 1  | NH<br>EJ | S<br>N<br>R<br>N<br>P7<br>0 | EN<br>S<br>T<br>000<br>002<br>214<br>48  | 1                | 1                | intr<br>on      | N/A                   | N/A             | N/A             | N/A       |                |                                                                                                                                                                                                                                                                                           |
| 3      | 72<br>79<br>54<br>7                            | 72<br>79<br>54<br>7                            | 1<br>5      | 71<br>47<br>79<br>61                           | 71<br>47<br>80<br>12                           | C<br>T<br>X | N<br>/<br>A           | B<br>R<br>C<br>1<br>7 | 1  | -1 | NA<br>HR | G<br>R<br>M<br>7            | EN<br>S<br>T<br>000<br>003<br>577<br>16  | 1                | 2                | intr<br>on      | N/A                   | N/A             | N/A             | N/A       |                |                                                                                                                                                                                                                                                                                           |
| 8      | 87<br>16<br>47<br>0<br>1.<br>19<br>E<br>E<br>0 | 87<br>16<br>47<br>0<br>1.<br>19<br>E<br>E<br>8 | 1<br>9<br>0 | 41<br>96<br>16<br>2<br>1.<br>19<br>E<br>E<br>8 | 41<br>96<br>16<br>2<br>1.<br>19<br>E<br>E<br>8 | C<br>T<br>X | N<br>/<br>A           | B<br>R<br>C<br>1<br>7 | -1 | 1  | NH<br>EJ | M<br>F<br>H<br>A<br>S1      | EN<br>S<br>T<br>000<br>002<br>762<br>82  | -                | 1                | 1               | intr<br>on            | N/A             | N/A             | N/A       | N/A            |                                                                                                                                                                                                                                                                                           |
| 1<br>0 | +0<br>8                                        | +0<br>8                                        | 1<br>0      | +0<br>8                                        | +0<br>8                                        | D<br>E<br>L | 4<br>4<br>1<br>3      | B<br>R<br>C<br>1<br>7 | 1  | 1  | NH<br>EJ | N/<br>A                     | N/A                                      | N<br>/<br>A<br>A | N<br>/<br>A<br>A | N/A             | N/A                   | N/A             | N/A             | N/A       |                |                                                                                                                                                                                                                                                                                           |
| 3      | 1.<br>23<br>E<br>E<br>+0<br>8                  | 1.<br>23<br>E<br>E<br>+0<br>8                  | 3           | 1.<br>23<br>E<br>E<br>+0<br>8                  | 1.<br>23<br>E<br>E<br>+0<br>8                  | D<br>E<br>L | 4<br>2<br>0<br>2      | B<br>R<br>C<br>1<br>7 | 1  | 1  | NH<br>EJ | I<br>Q<br>C<br>B1           | EN<br>S<br>T<br>000<br>003<br>498<br>20  | -                | 1                | 3               | intr<br>on            | ILDR1           | ENST00000383663 | -1        | cds_exon4      | SLC15A2 EAF2                                                                                                                                                                                                                                                                              |
| 1<br>3 | 61<br>52<br>41<br>02                           | 61<br>52<br>41<br>02                           | 1<br>3      | 61<br>52<br>42<br>65                           | 61<br>52<br>42<br>65                           | D<br>E<br>L | 1<br>6<br>3<br>0      | B<br>R<br>C<br>1<br>7 | 1  | 1  | NH<br>EJ | N/<br>A                     | N/A                                      | N<br>/<br>A<br>A | N<br>/<br>A<br>A | N/A             | N/A                   | N/A             | N/A             | N/A       |                |                                                                                                                                                                                                                                                                                           |
| 1<br>1 | 17<br>89<br>32<br>75                           | 17<br>89<br>32<br>75                           | 1<br>1      | 22<br>77<br>57<br>79                           | 22<br>77<br>57<br>79                           | D<br>E<br>L | 5<br>0<br>2<br>0      | B<br>R<br>C<br>1<br>7 | 1  | 1  | NH<br>EJ | S<br>E<br>R<br>G<br>EF      | EN<br>S<br>T<br>000<br>002<br>659<br>65  | -                | 1                | 9               | intr<br>on            | GAS2            | ENST00000278187 | 1         | intron6        | SLC17A6 SAAL1 ANO5 SPTY2D1 E2F8 LDHA NAV2 MRGPRX3<br>HPS5 SAA1 SAA2 LDHC MRGPRX1 FAM10A5 DBX1 TMEM86A<br>PTPN5 CSRP3 IGSF22 TSG101 MRGPRX2 HTATIP2 TPH1<br>ZDHHC13 NELL1 UEVLD PRMT3 SLC6A5 FANCF MRGPRX4<br>GTF2H1 SAA3P LDHAL6A SAA4                                                    |
| 3      | 1.<br>23<br>E<br>E<br>+0<br>8                  | 1.<br>23<br>E<br>E<br>+0<br>8                  | 3           | 1.<br>28<br>E<br>E<br>+0<br>8                  | 1.<br>28<br>E<br>E<br>+0<br>8                  | D<br>E<br>L | 9<br>1<br>C<br>8<br>2 | B<br>R<br>C<br>1<br>7 | 1  | 1  | NH<br>EJ | P<br>O<br>L<br>Q            | EN<br>S<br>T<br>000<br>002<br>642<br>33  | -                | 1                | 14              | intr<br>on            | CCDC37          | ENST00000352312 | 1         | cds_exon1<br>3 | HSPBAP1 SEC22A SEMA5B CSTA ILDR1 CD86 OSBPL1 IQCB1<br>PARP14 ROPN1B CCDC14 WDR5B ROPN1 SNX4 CCDC58 ZNF148<br>DTX3L SLC15A2 MUC13 CASR EAF2 MYLK GOLGB1 ADCY5 HEG1<br>SLC12A8 KPNA1 ARGFX SLC41A3 PARP9 KLF15 HCLS1 ALDH1L1<br>ITGB5 PARP15 KALRN PTPLB PDIA5 FBXO40 FAM162A UMPS<br>DIRC2 |

|        |                          |                          |        |                          |                          |             |                                 |                  |   |   |          |                       |                                     |             |             |             |            |                 |                 |         |                                                          |                                                                                                                                                                                                                                                                                                                                                                                                                                                                                                                                                                                                                                                                                                                                         |                                                                                                                                                                                                                                                                                                                                                                                                                                                                                                                                                                                                                                                                                                                                         |
|--------|--------------------------|--------------------------|--------|--------------------------|--------------------------|-------------|---------------------------------|------------------|---|---|----------|-----------------------|-------------------------------------|-------------|-------------|-------------|------------|-----------------|-----------------|---------|----------------------------------------------------------|-----------------------------------------------------------------------------------------------------------------------------------------------------------------------------------------------------------------------------------------------------------------------------------------------------------------------------------------------------------------------------------------------------------------------------------------------------------------------------------------------------------------------------------------------------------------------------------------------------------------------------------------------------------------------------------------------------------------------------------------|-----------------------------------------------------------------------------------------------------------------------------------------------------------------------------------------------------------------------------------------------------------------------------------------------------------------------------------------------------------------------------------------------------------------------------------------------------------------------------------------------------------------------------------------------------------------------------------------------------------------------------------------------------------------------------------------------------------------------------------------|
| 3      | 1.<br>23<br>E<br>+0<br>8 | 1.<br>23<br>E<br>+0<br>8 | 3      | 1.<br>23<br>E<br>+0<br>8 | 1.<br>23<br>E<br>+0<br>8 | D<br>E<br>L | 5<br>0<br>0<br>8<br>7<br>2<br>3 | B<br>R<br>C<br>2 | 1 | 1 | NH<br>EJ | P<br>O<br>L<br>Q      | EN<br>ST<br>000<br>002<br>642<br>33 | -           | 1           | 13          | intr<br>on | ILDR1           | ENST00000273691 | -1      | intron5                                                  | IQCB1 ARGFX FBXO40 SLC15A2 HCLS1 EAF2 GOLGB1                                                                                                                                                                                                                                                                                                                                                                                                                                                                                                                                                                                                                                                                                            |                                                                                                                                                                                                                                                                                                                                                                                                                                                                                                                                                                                                                                                                                                                                         |
| 2      | 1.<br>65<br>E<br>+0<br>8 | 1.<br>65<br>E<br>+0<br>8 | 2      | 1.<br>65<br>E<br>+0<br>8 | 1.<br>65<br>E<br>+0<br>8 | D<br>E<br>L | 9<br>9<br>6<br>4                | B<br>R<br>C<br>2 | 1 | 1 | NH<br>EJ | C<br>O<br>B<br>L<br>L | EN<br>ST<br>000<br>003<br>421<br>93 | -           | 1           | 1           | intr<br>on | COBLL1          | ENST00000342193 | -1      | intron1                                                  | N/A                                                                                                                                                                                                                                                                                                                                                                                                                                                                                                                                                                                                                                                                                                                                     |                                                                                                                                                                                                                                                                                                                                                                                                                                                                                                                                                                                                                                                                                                                                         |
| 1<br>8 | 96<br>11<br>93<br>8      | 96<br>11<br>93<br>8      | 1<br>8 | 96<br>12<br>26<br>7      | 96<br>12<br>26<br>7      | D<br>E<br>L | 3<br>0<br>2<br>4                | B<br>R<br>C<br>2 | 1 | 1 | NA<br>HR | N/<br>A               | N/<br>A                             | N<br>/<br>A | N<br>/<br>A | N<br>/<br>A | N/A        | N/A             | N/A             | N/A     | N/A                                                      | N/A                                                                                                                                                                                                                                                                                                                                                                                                                                                                                                                                                                                                                                                                                                                                     | N/A                                                                                                                                                                                                                                                                                                                                                                                                                                                                                                                                                                                                                                                                                                                                     |
| 3      | 87<br>78<br>92           | 87<br>78<br>92           | 3      | 1.<br>23<br>E<br>+0<br>8 | 1.<br>23<br>E<br>+0<br>8 | D<br>E<br>L | 3<br>5<br>4<br>4<br>9<br>7<br>9 | B<br>R<br>C<br>2 | 1 | 1 | NH<br>EJ | N/<br>A               | N/A                                 | N<br>/<br>A | N<br>/<br>A | N<br>/<br>A | N/A        | N/A             | N/A             | N/A     | N/A                                                      | N/A                                                                                                                                                                                                                                                                                                                                                                                                                                                                                                                                                                                                                                                                                                                                     | N/A                                                                                                                                                                                                                                                                                                                                                                                                                                                                                                                                                                                                                                                                                                                                     |
| 1<br>8 | 25<br>69<br>71           | 25<br>69<br>71           | 1<br>8 | 28<br>93<br>94           | 28<br>93<br>94           | D<br>E<br>L | 1<br>3<br>5                     | B<br>R<br>C<br>2 | 1 | 1 | MM<br>EJ | N/<br>A               | N/A                                 | N<br>/<br>A | N<br>/<br>A | N<br>/<br>A | N/A        | N/A             | N/A             | N/A     | N/A                                                      | N/A                                                                                                                                                                                                                                                                                                                                                                                                                                                                                                                                                                                                                                                                                                                                     | DSG4 RNF138 B4GALT6 DSC2 FAM59A DSC1 MEP1B DSG1 TTR<br>DSG2 RNF125 KLHL14 DSC3 WBP11P1 MCART2 KIAA1012 DSG3                                                                                                                                                                                                                                                                                                                                                                                                                                                                                                                                                                                                                             |
| 1<br>8 | 49<br>43<br>50<br>31     | 49<br>43<br>50<br>31     | 1<br>8 | 51<br>01<br>64<br>78     | 51<br>01<br>64<br>78     | D<br>E<br>L | 0<br>4<br>2<br>7                | B<br>R<br>C<br>2 | 1 | 1 | NH<br>EJ | N/<br>A               | N/A                                 | N<br>/<br>A | N<br>/<br>A | N<br>/<br>A | N/A        | N/A             | N/A             | N/A     | N/A                                                      | N/A                                                                                                                                                                                                                                                                                                                                                                                                                                                                                                                                                                                                                                                                                                                                     | STARD6 RAB27B C18orf26 MBD2 C18orf54 CCDC68 POLI                                                                                                                                                                                                                                                                                                                                                                                                                                                                                                                                                                                                                                                                                        |
| 8      | 49<br>78<br>83<br>03     | 49<br>78<br>83<br>03     | 8      | 49<br>78<br>92<br>77     | 49<br>78<br>92<br>77     | D<br>E<br>L | 9<br>7<br>2<br>0                | B<br>R<br>C<br>2 | 1 | 1 | MM<br>EJ | N/<br>A               | N/A                                 | N<br>/<br>A | N<br>/<br>A | N<br>/<br>A | N/A        | N/A             | N/A             | N/A     | N/A                                                      | N/A                                                                                                                                                                                                                                                                                                                                                                                                                                                                                                                                                                                                                                                                                                                                     | N/A                                                                                                                                                                                                                                                                                                                                                                                                                                                                                                                                                                                                                                                                                                                                     |
| 9      | 18<br>73<br>26<br>01     | 18<br>73<br>26<br>01     | 9      | 19<br>60<br>55<br>25     | 19<br>60<br>55<br>25     | D<br>E<br>L | 1<br>9<br>2<br>3                | B<br>R<br>C<br>2 | 1 | 1 | NH<br>EJ | N/<br>A               | EN<br>ST<br>000<br>003<br>805<br>48 | 1           | 15          | intr<br>on  | SLC24A2    | ENST00000341998 | -1              | intron3 | ACER2 RPS6 ADFP ADAMTSL1 FAM154A RRAGA FAM29A<br>DENND4C |                                                                                                                                                                                                                                                                                                                                                                                                                                                                                                                                                                                                                                                                                                                                         |                                                                                                                                                                                                                                                                                                                                                                                                                                                                                                                                                                                                                                                                                                                                         |
| 1<br>8 | 25<br>52<br>76<br>08     | 25<br>52<br>76<br>08     | 1<br>8 | 28<br>94<br>05<br>26     | 28<br>94<br>05<br>26     | D<br>E<br>L | 1<br>9<br>1<br>5                | B<br>R<br>C<br>2 | 1 | 1 | MM<br>EJ | N/<br>A               | N/A                                 | N<br>/<br>A | N<br>/<br>A | N<br>/<br>A | N/A        | N/A             | N/A             | N/A     | N/A                                                      | DSG4 RNF138 B4GALT6 DSC2 FAM59A DSC1 MEP1B DSG1 TTR<br>DSG2 RNF125 KLHL14 DSC3 WBP11P1 MCART2 KIAA1012 DSG3<br>FSTL1 C3orf66 TOMM70A KIAA1524 C3orf15 PVRL3 OR5K1 ZNF80<br>KTELC1 DHFRL1 RG9MTD1 CRYBG3 WDR52 IFT57 OR5H15<br>ABHD10 ZPLD1 LRRC58 TAGLN3 CCDC80 GTPBP8 NAT13 NR112<br>ARL13B CD96 PLA1A GAP43 CBLB DRD3 ALCAM KIAA1407 SIDT1<br>EPAH6 OR5K3 OR5AC2 OR5H6 EPAH3 RABL3 DPPA4 GUCA1C<br>PROS1 BTLA RETNLB MORC1 TIGIT ZBTB11 IMPG2 GABRR3<br>C3orf26 TMEM39A NSUN3 CCDC52 HHLA2 NIT2 CD200R1L<br>IGSF11 CGGBP1 ZDHHC23 MYH15 C3orf52 CCDC54 STXBP5L<br>SEN7 TMPPRS7 CPOX C3orf1 GTF2E1 LNP1 TBC1D23 CLDND1<br>C3orf38 UPK1B COX17 HTR1F HGD STX19 NFKBIZ GSK3B ZBED2<br>B4GALT4 OR5K4 RPL24P6 C3orf17 SLC35A5 ATG3 ST3GAL6 |                                                                                                                                                                                                                                                                                                                                                                                                                                                                                                                                                                                                                                                                                                                                         |
| 3      | 86<br>71<br>14<br>77     | 86<br>71<br>14<br>77     | 3      | 1.<br>23<br>E<br>+0<br>8 | 1.<br>23<br>E<br>+0<br>8 | D<br>E<br>L | 3<br>6<br>0<br>0<br>0           | B<br>R<br>C<br>2 | 1 | 1 | NH<br>EJ | N/<br>A               | N/A                                 | N<br>/<br>A | N<br>/<br>A | N<br>/<br>A | N/A        | N/A             | N/A             | N/A     | N/A                                                      | N/A                                                                                                                                                                                                                                                                                                                                                                                                                                                                                                                                                                                                                                                                                                                                     | DSG4 RNF138 B4GALT6 DSC2 FAM59A DSC1 MEP1B DSG1 TTR<br>DSG2 RNF125 KLHL14 DSC3 WBP11P1 MCART2 KIAA1012 DSG3<br>FSTL1 C3orf66 TOMM70A KIAA1524 C3orf15 PVRL3 OR5K1 ZNF80<br>KTELC1 DHFRL1 RG9MTD1 CRYBG3 WDR52 IFT57 OR5H15<br>ABHD10 ZPLD1 LRRC58 TAGLN3 CCDC80 GTPBP8 NAT13 NR112<br>ARL13B CD96 PLA1A GAP43 CBLB DRD3 ALCAM KIAA1407 SIDT1<br>EPAH6 OR5K3 OR5AC2 OR5H6 EPAH3 RABL3 DPPA4 GUCA1C<br>PROS1 BTLA RETNLB MORC1 TIGIT ZBTB11 IMPG2 GABRR3<br>C3orf26 TMEM39A NSUN3 CCDC52 HHLA2 NIT2 CD200R1L<br>IGSF11 CGGBP1 ZDHHC23 MYH15 C3orf52 CCDC54 STXBP5L<br>SEN7 TMPPRS7 CPOX C3orf1 GTF2E1 LNP1 TBC1D23 CLDND1<br>C3orf38 UPK1B COX17 HTR1F HGD STX19 NFKBIZ GSK3B ZBED2<br>B4GALT4 OR5K4 RPL24P6 C3orf17 SLC35A5 ATG3 ST3GAL6 |

SLC9A10 CD80 CD47 C3orf30 OR5H14 NDUFB4 ADPRH POPDC2  
 QTRTD1 PLCXD2 ZBTB20 VGLL3 COL8A1 BOC OR5H2 WDR82P1  
 TFG FAM172B GCET2 TMEM45A POU1F1 BZW1L1 DZIP3 LSAMP  
 ATP6V1A ZNF654 DCBLD2 MINA KIAA2018 GPR156 OR5H1 CD200  
 FAM55C GPR128 BBX CHMP2B TRAT1 DPPA2 CD200R1 OR5K2  
 ABI3BP ARL6 GPR15 CEP97 PCNP GRAMD1C FILIP1L

|        |                      |                      |        |                      |                      |             |                  |                       |    |    |          |                   |                                           |   |                 |                  |                 |                 |         |            |                                  |
|--------|----------------------|----------------------|--------|----------------------|----------------------|-------------|------------------|-----------------------|----|----|----------|-------------------|-------------------------------------------|---|-----------------|------------------|-----------------|-----------------|---------|------------|----------------------------------|
| 3      | 1.<br>23<br>E<br>+0  | 1.<br>23<br>E<br>+0  | 3      | 1.<br>23<br>E<br>+0  | 1.<br>23<br>E<br>+0  | D<br>E<br>L | 9<br>7<br>2<br>0 | B<br>R<br>C<br>2<br>0 | 1  | 1  | NH<br>EJ | P<br>O<br>L<br>Q  | EN<br>ST<br>000<br>002<br>642<br>33<br>EN | - | 1               | intr<br>on<br>15 | ARGFX           | ENST00000334384 | 1       | utr_exon4  | N/A                              |
| 6      | 24<br>43<br>88<br>19 | 24<br>43<br>88<br>19 | 7      | 72<br>97<br>64<br>84 | 72<br>97<br>64<br>84 | C<br>T<br>X | N<br>A           | B<br>R<br>C<br>0      | -1 | -1 | NH<br>EJ | D<br>C<br>C2      | EN<br>ST<br>000<br>003<br>784<br>54       | - | 1               | intr<br>on<br>2  | N/A             | N/A             | N/A     | N/A        |                                  |
| 6      | 1.<br>07<br>E<br>+0  | 1.<br>07<br>E<br>+0  | 2      | 28<br>02<br>04<br>62 | 28<br>02<br>04<br>62 | C<br>T<br>X | N<br>A           | B<br>R<br>C<br>0      | 1  | -1 | NH<br>EJ | N/<br>A           | N/A                                       | N | /               | N/<br>A          | N/A             | N/A             | N/A     | N/A        |                                  |
| 1<br>8 | 56<br>86<br>57<br>55 | 56<br>86<br>57<br>55 | 2<br>1 | 15<br>16<br>57<br>60 | 15<br>16<br>57<br>60 | C<br>T<br>X | N<br>A           | B<br>R<br>C<br>0      | -1 | -1 | MM<br>EJ | N/<br>A           | N/A                                       | N | /               | N/<br>A          | N/A             | N/A             | N/A     | N/A        |                                  |
| 1      | 34<br>92<br>02       | 34<br>92<br>02       | 5      | 64<br>64<br>88<br>43 | 64<br>64<br>88<br>43 | C<br>T<br>X | N<br>A           | B<br>R<br>C<br>0      | 1  | 1  | NH<br>EJ | N/<br>A           | N/A                                       | N | /               | N/<br>A          | N/A             | N/A             | N/A     | N/A        |                                  |
| 1<br>8 | 26<br>34<br>21<br>01 | 26<br>34<br>21<br>01 | 2<br>1 | 30<br>68<br>84<br>99 | 30<br>68<br>84<br>99 | C<br>T<br>X | N<br>A           | B<br>R<br>C<br>0      | 1  | 1  | NH<br>EJ | N/<br>A           | N/A                                       | N | /               | N/<br>A          | N/A             | N/A             | N/A     | N/A        |                                  |
| 6      | 56<br>E<br>+0        | 56<br>E<br>+0        | 2      | 53<br>82<br>18<br>50 | 53<br>82<br>18<br>50 | C<br>T<br>X | N<br>A           | B<br>R<br>C<br>0      | 1  | 1  | NH<br>EJ | N/<br>A           | N/A                                       | N | /               | N/<br>A          | N/A             | N/A             | N/A     | N/A        |                                  |
| 1<br>8 | 51<br>01<br>59<br>03 | 51<br>01<br>59<br>03 | 2<br>1 | 23<br>12<br>04<br>83 | 23<br>12<br>04<br>83 | C<br>T<br>X | N<br>A           | B<br>R<br>C<br>0      | 1  | 1  | NH<br>EJ | N/<br>A           | N/A                                       | N | /               | N/<br>A          | N/A             | N/A             | N/A     | N/A        |                                  |
| 8      | 74<br>28<br>01<br>54 | 74<br>28<br>01<br>54 | 1      | 34<br>81<br>32<br>03 | 34<br>81<br>32<br>03 | C<br>T<br>X | N<br>A           | B<br>R<br>C<br>0      | 1  | 1  | MM<br>EJ | N/<br>A           | N/A                                       | N | /               | N/<br>A          | N/A             | N/A             | N/A     | N/A        |                                  |
| 3      | 1.<br>23<br>E<br>+0  | 1.<br>23<br>E<br>+0  | 6      | 57<br>62<br>05<br>23 | 57<br>62<br>05<br>23 | C<br>T<br>X | N<br>A           | B<br>R<br>C<br>0      | -1 | 1  | MM<br>EJ | I<br>Q<br>C<br>B1 | EN<br>ST<br>000<br>003<br>498<br>20       | - | 1               | intr<br>on<br>3  | PRIM2           | ENST00000389488 | 1       | utr_exon10 | N/A                              |
| 3      | 1.<br>23<br>E<br>+0  | 1.<br>23<br>E<br>+0  | 6      | 57<br>62<br>51<br>66 | 57<br>62<br>51<br>66 | C<br>T<br>X | N<br>A           | B<br>R<br>C<br>0      | 1  | -1 | NH<br>EJ | H<br>C<br>L<br>S1 | EN<br>ST<br>000<br>003<br>145<br>83       | - | 1               | intr<br>on<br>5  | N/A             | N/A             | N/A     | N/A        |                                  |
| 7      | 29<br>88<br>33<br>28 | 29<br>88<br>33<br>28 | 7      | 29<br>88<br>34<br>68 | 29<br>88<br>34<br>68 | D<br>E<br>L | 1<br>3<br>2      | B<br>R<br>C<br>2      | 1  | 1  | NH<br>EJ | W<br>I<br>P<br>F  | EN<br>ST<br>000<br>004<br>091             | 1 | intr<br>on<br>2 | WIPF3            | ENST00000409123 | 1               | intron2 | N/A        |                                  |
| 1<br>3 | 21<br>91<br>72<br>51 | 21<br>91<br>72<br>51 | 3      | 23<br>28<br>59<br>72 | 23<br>28<br>59<br>72 | D<br>E<br>L | 7<br>7<br>2      | B<br>R<br>C<br>2      | 1  | 1  | NH<br>EJ | N/<br>A           | N/A                                       | N | /               | N/<br>A          | MIPEP           | ENST00000382172 | -1      | intron14   | TNFRSF19 SGCG HMGA1L6 MIPEP SACS |



|    |                          |                          |                          |                          |             |                            |                       |    |    |          |                   |                                      |             |                  |         |                 |     |          |                                                 |
|----|--------------------------|--------------------------|--------------------------|--------------------------|-------------|----------------------------|-----------------------|----|----|----------|-------------------|--------------------------------------|-------------|------------------|---------|-----------------|-----|----------|-------------------------------------------------|
| 5  | 1.<br>77<br>E<br>+0<br>8 | 1.<br>77<br>E<br>+0<br>8 | 1.<br>77<br>E<br>+0<br>8 | 1.<br>77<br>E<br>+0<br>8 | D<br>E<br>L | 1<br>2<br>9                | B<br>R<br>C<br>2<br>3 | 1  | 1  | NA<br>HR | N/<br>A           | N/A                                  | N<br>/<br>A | N<br>/<br>A      | N/A     | N/A             | N/A | N/A      |                                                 |
| 1  | 2.<br>18<br>E<br>+0<br>8 | 2.<br>18<br>E<br>+0<br>8 | 43<br>13<br>04<br>54     | 43<br>13<br>04<br>54     | C<br>T<br>X | N<br>/<br>A                | B<br>R<br>C<br>2<br>4 | -1 | 1  | MM<br>EJ | N/<br>A           | N/A<br>EN<br>ST<br>000<br>003<br>206 | N<br>/<br>A | N<br>/<br>A      | HGSNAT  | ENST00000332689 | 1   | intron2  | N/A                                             |
| 5  | 80<br>86<br>23<br>72     | 80<br>86<br>23<br>72     | 80<br>86<br>32<br>64     | 80<br>86<br>32<br>64     | D<br>E<br>L | 8<br>9<br>2<br>1           | B<br>R<br>C<br>6      | 1  | 1  | NH<br>EJ | S<br>S<br>B<br>P2 | EN<br>ST<br>000<br>003<br>206<br>72  | -           | intr<br>on<br>4  | SSBP2   | ENST00000320672 | -1  | intron4  | N/A                                             |
| 6  | 12<br>45<br>49<br>55     | 12<br>45<br>49<br>55     | 12<br>45<br>65<br>39     | 12<br>45<br>65<br>39     | D<br>E<br>L | 1<br>5<br>8<br>3           | B<br>R<br>C<br>6      | 1  | 1  | NH<br>EJ | N/<br>A           | N/A                                  | N<br>/<br>A | N<br>/<br>A      | N/A     | N/A             | N/A | N/A      | N/A                                             |
| 4  | 60<br>30<br>41<br>08     | 60<br>30<br>41<br>08     | 60<br>30<br>42<br>79     | 60<br>30<br>42<br>79     | D<br>E<br>L | 1<br>7<br>1                | B<br>R<br>C<br>6      | 1  | 1  | NH<br>EJ | N/<br>A           | N/A                                  | N<br>/<br>A | N<br>/<br>A      | N/A     | N/A             | N/A | N/A      | N/A                                             |
| 9  | 16<br>17<br>75<br>3      | 16<br>17<br>75<br>3      | 16<br>17<br>97<br>6      | 16<br>17<br>97<br>6      | D<br>E<br>L | 2<br>2<br>3                | B<br>R<br>C<br>6      | 1  | 1  | NH<br>EJ | N/<br>A           | N/A                                  | N<br>/<br>A | N<br>/<br>A      | N/A     | N/A             | N/A | N/A      | N/A                                             |
| 10 | 37<br>66<br>44<br>16     | 37<br>66<br>44<br>16     | 37<br>66<br>47<br>27     | 37<br>66<br>47<br>27     | D<br>E<br>L | 3<br>1<br>0                | B<br>R<br>C<br>6      | 1  | 1  | NH<br>EJ | N/<br>A           | N/A                                  | N<br>/<br>A | N<br>/<br>A      | N/A     | N/A             | N/A | N/A      | N/A                                             |
| 2  | 32<br>58<br>90<br>58     | 32<br>58<br>90<br>58     | 32<br>58<br>92<br>54     | 32<br>58<br>92<br>54     | D<br>E<br>L | 1<br>9<br>2<br>7           | B<br>R<br>C<br>6      | 1  | 1  | NH<br>EJ | BI<br>R<br>C6     | EN<br>ST<br>000<br>002<br>613<br>59  | 1           | intr<br>on<br>52 | BIRC6   | ENST00000261359 | 1   | intron53 | N/A                                             |
| 4  | 81<br>92<br>27<br>44     | 81<br>92<br>27<br>44     | 81<br>92<br>29<br>23     | 81<br>92<br>29<br>23     | D<br>E<br>L | 1<br>8<br>0                | B<br>R<br>C<br>6      | 1  | 1  | VN<br>TR | C4<br>orf<br>22   | EN<br>ST<br>000<br>004<br>067<br>49  | 1           | intr<br>on<br>4  | C4orf22 | ENST00000406749 | 1   | intron4  | N/A                                             |
| X  | 1.<br>35<br>E<br>+0<br>8 | 1.<br>35<br>E<br>+0<br>8 | 1.<br>35<br>E<br>+0<br>8 | 1.<br>35<br>E<br>+0<br>8 | D<br>E<br>L | 1<br>2<br>7                | B<br>R<br>C<br>6      | 1  | 1  | MM<br>EJ | N/<br>A           | N/A                                  | N<br>/<br>A | N<br>/<br>A      | N/A     | N/A             | N/A | N/A      | N/A                                             |
| 2  | 2.<br>31<br>E<br>+0<br>8 | 2.<br>31<br>E<br>+0<br>8 | 13<br>23<br>49           | 13<br>23<br>49           | C<br>T<br>X | N<br>/<br>A                | B<br>R<br>C<br>6      | 1  | -1 | NH<br>EJ | S<br>P1<br>00     | EN<br>ST<br>000<br>004<br>098<br>24  | 1           | intr<br>on<br>1  | COX10   | ENST00000261643 | 1   | intron3  | N/A                                             |
| 2  | 64<br>14<br>95<br>0      | 64<br>14<br>95<br>0      | 64<br>18<br>04<br>5      | 64<br>18<br>04<br>5      | D<br>E<br>L | 3<br>0<br>9                | B<br>R<br>C<br>9      | 1  | 1  | NH<br>EJ | N/<br>A           | N/A                                  | N<br>/<br>A | N<br>/<br>A      | N/A     | N/A             | N/A | N/A      | N/A                                             |
| 7  | 90<br>23<br>41<br>28     | 90<br>23<br>41<br>28     | 90<br>23<br>43<br>01     | 90<br>23<br>43<br>01     | D<br>E<br>L | 1<br>7<br>4<br>3<br>3<br>3 | B<br>R<br>C<br>9      | 1  | 1  | NH<br>EJ | PF<br>TK<br>1     | EN<br>ST<br>000<br>003<br>800<br>50  | 1           | intr<br>on<br>4  | PFTK1   | ENST00000380050 | 1   | intron4  | N/A                                             |
| 8  | 31<br>52<br>55<br>42     | 31<br>52<br>55<br>42     | 34<br>86<br>44<br>69     | 34<br>86<br>44<br>69     | D<br>E<br>L | 7<br>9                     | B<br>R<br>C<br>9      | 1  | 1  | NH<br>EJ | N/<br>A           | N/A                                  | N<br>/<br>A | N<br>/<br>A      | N/A     | N/A             | N/A | N/A      | DUSP26 RPL10AP3 MAK16 C8orf41 NRG1 FUT10 RNF122 |









SLC22A15 KCNA3 DLEU2L CREG1 DDAH1 TARS2 ATP1A4  
HIST2H4B CSF1 JTB APH1A THBS3 GPR89C SORT1 SAMD13  
PMF1 VHLH C1orf177 HS2S21 C1orf138 LRP8 MCOLN3 COPA  
C1orf2 LENEPE SETDB1 MUC1 C1orf46 ENSA GCLM AGL GBP1  
FAM72B FAM159A OR6K1P SCP2 PALMD PKLR GNG5 FAM102B  
EFNA4 KIAA1324 USP24 MAEL ATG4C HSD3B2 CSDE1 WDR77  
ADH5P2 CLK2 SPRR2A C1orf168 SH3GLB1 S100A5 C1orf83  
C1orf56 NPR1 ARHGAP29 GSTM4 OR10T1P BCL9 C1orf62  
TMEM59 TACSTD2 RGS4 FAM108A2 MAGI3 RCSD1 FAM40A  
FOXO3 POGZ PCP4L1 RPS10P6 ALG14 C1orf123 SYPL2  
SLC25A44 GPR177 MTX1 FMO5 PDZK1P2 NBPF8 ADOXA3 GBP6  
FAM69A EFCAB7 OR10K1 DRD5P2 SLAMF1 DPYD SLC16A4 BRDT  
FCGR3B ZNF687 ARHGEF2 DUSP27 HSPB11 TCHHL1 SARS  
TNNI3K FCRL3 LRRCA4 GJA8 NEXN OR10J9P PSMB4 SMO5  
LRRC7 USP33 CYGSP52 CRYZ SPTA1 OVGP1 WNT2B CTBS  
CCT3 C1orf111 UBAP2L SGIP1 S100A2 RSNB1 GNG12 C1orf152  
APCS IL6R GTF2B CHRN2 uc001elpl.1 SSR2 EEF1A9 CD53  
VTCN1 CNN3 NIT1 TBX19 CRP EXTL2 PPAP2B TMCO1 CD247  
S100A7L2 CRNN EVI5 HIST2H2AA3 DCLRE1B NBPF11 MCOLN2  
CCDC18 SYT11 SYCP1 CFLP2 HHLA3 ALX3 TDRKH C1orf141  
FCGR1B CHIA C1orf175 RTCD1 RPS15P1 PPAPR5 FCRL4 GSTM3  
POGK SPRR2B NRAS ADAR PSM2A SLC35D1 DR1 ECM1 TTC22  
FLAD1 CD58 CD48 C1orf51 AHCYL1 FUBP1 PTGFR KI12 RIT1  
SH2D1B MNDA OR10J3 NTNG1 CCDC76 GF11 PBX1 RAB13 USF1  
SLAMF7 OSBPL9 LRRCS3 PDE4B ASH1L UHMK1 FCRL5 PRPF3  
LRRC8B OLFML2B S100A10 NOS1AP ATP1A1 C1orf59 IGSF8  
C1orf54 IL23R SH2D2A ANXA9 NR1I3 LMO4 ABCA4 KIAA1245  
OAZ3 PHTF1 PDE4DIP C1orf189 KCNC4 OTUD7B LCE5A CLCA1  
IFI16 C1orf226 LEPR DNTTIP2 LCE3A TIPRL SDHC ATF6 FNDC7  
CKS1B NBPF6 RPTN ALG6 NOTCH2NL NDUFS2 CYB5RL NBPF1  
B4GALT3 RAVR2 RPE65 GBP3 LEPROT SCAMP3 VCAM1 S100A3  
CDC42SE1 PRPF38A TDRD10 CD1E FAF1 KCNJ9 SPRR2F  
HIST2H2AA4 HAO2 DPM3 OR6N2 AP4B1 TTC24 TUFT1 CTSS  
HIST2H2BD GNRHR2 VANGL2 C1orf68 PRKAB2 IGSF9 ZCCHC11  
TLL7 C1orf203 HIST2H3P2 RAG1AP1 FLG HIST2HD TGFB3  
TRIM45 C1orf194 PTGFRN PBXIP1 NHLH2 OR10T2 FAM108A3  
ILDR2 INSL5 NBPF16 EFNA1 SLC35A3 YY1A1 LCE2D KCND3  
LRRC42 TMEM79 C1orf92 TOMM40L PRUNE PMVK DBT RPL4P2  
PTBP2 IQWD1 AMY2B OR11I1P FCER1A HFE2 KIAA1107 DIO1  
PGM1 CD84 ETV3L JAK1 MRPS21 S100A14 FAM78B RBM8A  
LINGO4 SPRR3 PIP5K1A DNAJB4 EPS8L3 VANGL1 GPATCH4  
MAGOH AK5 AMY2A OLFML3 HSD3B1 ADAMT54 SYDE2 C1orf137  
CELSR2 PDZK1 RWDD3 PPOX KIRREL FMO8P CDMN2C  
CYB561D1 HSPA6 SV2A DENND4B ECHDC2 DCST2 TCTEX1D1  
DMRTB1 OR6N1 APOA1BP VPS72 HOOK1 SLAMF8 MPZL1  
LYSMD1 FCGR1A LRR1Q3 PHGDH ACP6 EPS15 CCT8P1 OR10J1  
RORC AMPD1 APOA2 LOR C1orf192 EFNA3 NES LDLRAD1  
SEMA4A PEX19 RPL36AP11 ADAMTSL4 FCRL2 LCE2C NEGR1  
ELTD1 SXS2IP TM2D1 CD2 C1orf204 UOX UBE2U AIM2 OR6K5P  
SMCP RPAP2 GNAT2 GBP2 FCGR3A CGN SPRR2G HAX1 C1orf52  
TMEM167B FAM46C C1orf66 LHX8 NCSTN WARS2 NHLH1 S100A7  
LCE2B PYHIN1 SF3B4 TRIM46 uc001dmb.1 FCRLA TMEM77  
ZNF644 FMO3P CTSK NOTCH2 GSTM5 BSND CTH NR1H5P  
SPRR4 SLC30A7 LCE1D FCER1G CRTG2 COBL2 HIST2H2BF  
WDR42A C1orf77 ODF2L ANKRD34A F11R LY9 KCNN3 WDR78  
HDGF S100A7A BCAS2 ZBTB7B TMED5 COL24A1 DDR2 FMO11P  
OR6K6 BRP44 ZNF326 GPR89A HAPLN2 SFT2D2 BOLA1  
HSP90B3P SLC44A5 TMEM61 ISG20L2 C1orf103 RNF115 GBA  
CLCA2 RNF11 F3 RABGG1B RPL17 ZZZ3 RPL7P8 RPL26P12  
uc001fkh.2 COL11A1 ROBLD3 ASB17 S100A12 PYGO2 POLR3GL  
LMNA uc001efo.2 C1orf163 HIST2H2AB KCNJ10 TMEM48  
HNRNPA1L1 CASQ2 AMPD2 CEPT1 C1orf191 KPRP PRKACB  
THEM4 PRMT6 GBP5 OR10K2 HSD17B7 OR6Y1 C1orf87 POU2F1  
MLL11 BCAR3 FCRLB RAB25 OLFM3 GPA33 INADL L1TD1  
OR2AQ1P SLC39A1 C1orf110 DOCK7 SEC22B SRGAP2P2 S100A6  
TSHB S100A1 LCE2A ABHD7 KANK4 GATAD2B LCE1C BCL10  
TTC4 UBL4B SPRR1A SERBP1 PGLYRP4 LELP1 WDR3 PRPF38B  
HIAT1 C1orf185 GSTM2 TXNDC12 OR6K3 UAP1 LCE3C JUN  
OR10R1P CTTNBP2NL LMX1A PEAR1 OMA1 ADAM15 FMO7P  
PIGK S100A16 RNPC3 POLR3C KLHDC9 ROR1 LCE1E C1orf180  
S100A8 LPHN2 IVL NRD1 TMEM56 MRPL9 TSPAN2 AMYP1  
UBE2Q1 PCSK9 CYP2J2 NUF2 PRCC HCN3 TNFAIP8L2 IGSF2  
BTBD8 uc001dse.1 FCRL1 PARS2 PRR9 DENND2D HORMAD1  
CYR61 BNIPL FDCP3 PGLYRP3 ERVK5 PSRC1 TBX15 VAV3  
MTMR11 LCE3B MRPL37 STXBP3 CHD1L MSTO1 SELENBP1  
DDX20 MCL1 SCN11 GBP4 PVRL4 PSMA5 AMIGO1 FAM19A3  
ZNF697 TXNIP DARC SLC16A1 LCE4A ALDH9A1 GBAP GJA5  
ADCY10 SPRR2E LRRC39 ZRANB2 NBPF7 S100A11 ST6GALNAC3

|   |    |    |   |    |    |   |   |   |   | EN<br>ST<br>000 |     |   |    |            |                 |     |           |                                                                                                                                                                                                                                                                                                                                                                                                                                                                                                                                                                                                                                                                                                                                                                                                                                                                                                                                                                                                                                                                                                                                                                                                                                                                                                                                                                                                                                                                     |
|---|----|----|---|----|----|---|---|---|---|-----------------|-----|---|----|------------|-----------------|-----|-----------|---------------------------------------------------------------------------------------------------------------------------------------------------------------------------------------------------------------------------------------------------------------------------------------------------------------------------------------------------------------------------------------------------------------------------------------------------------------------------------------------------------------------------------------------------------------------------------------------------------------------------------------------------------------------------------------------------------------------------------------------------------------------------------------------------------------------------------------------------------------------------------------------------------------------------------------------------------------------------------------------------------------------------------------------------------------------------------------------------------------------------------------------------------------------------------------------------------------------------------------------------------------------------------------------------------------------------------------------------------------------------------------------------------------------------------------------------------------------|
| 1 | 12 | E  | 1 | 12 | E  | D | 3 | 9 | 3 | AT<br>P1        | 003 | 1 | 1  | intr<br>on |                 |     |           |                                                                                                                                                                                                                                                                                                                                                                                                                                                                                                                                                                                                                                                                                                                                                                                                                                                                                                                                                                                                                                                                                                                                                                                                                                                                                                                                                                                                                                                                     |
| 3 | +0 | 8  | 1 | +0 | 8  | L | 0 | 1 | 1 | NH<br>EJ        | 756 | 1 | 1  | ATP11A     | ENST00000375630 | 1   | intron1   | N/A                                                                                                                                                                                                                                                                                                                                                                                                                                                                                                                                                                                                                                                                                                                                                                                                                                                                                                                                                                                                                                                                                                                                                                                                                                                                                                                                                                                                                                                                 |
| 1 | 02 | E  | 1 | 03 | E  | D | 1 | 1 | 3 | NH<br>N/A       | N/A | N | N  | SFXN3      | ENST00000393459 | 1   | cds_exon5 | <p>PDZD7 FAM178A PAX2 LZTS2 SEMA4G PEO1 MRPL43<br/>MMS19 CALHM3 CYP17A1 SMNDC1 HNSE2 PNLI CCDC147<br/>PEO1 KCNIP2 BTRC SORCS3 GBF1 INPP5F KAZALD1 SLC18A2<br/>SUFU FBXW4 FAM178A SFXN4 NFKB2 C10orf95 CUEDC2 CASP7<br/>PDZD8 UBTD1 ENTPD7 SORCS1 VWA2 C10orf82 ADD3 OBFC1<br/>GOLGA7B TDRD1 ADRB1 ACSL5 KIAA1598 GUCY2G PRDX3<br/>PDCD11 CNM2 SEC31B CASC2 PCGF6 DUSP GSTO2 PDZD7<br/>EMX2 MARVELD1 CNM1 MGEA5 LOXL4 TRUB1 NDUFB8 VTI1A<br/>ADRA2A NT5C2 PGAM1 ARHGAP19 NCRNA00081 SFRP5<br/>SEC23IP USMG5 PNLI PRP3 PAX2 COX15 CWF19L1 C10orf28<br/>WDR11 NANOS1 PI4K2A GOT1 NEURL C10orf85 FRAT1<br/>FAM180B1 ABCC2 FBXL15 FGF8 HPS1 RPL19P16 TCF7L2<br/>CALHM2 EXOSC1 ANKRD2 MORF4 RAB11FIP2 C10orf33 FGFR2<br/>C10orf81 LBX1 NPM3 C10orf134 SFXN2 GSTO1 BLOC1S2 ITPRIP<br/>CPN1 NOLC1 RBM20 RPS84 AVP1 AFAP1L2 RGS10 TEC1B<br/>TMEM180 SLC25A28 SCD SLK C10orf78 ACTR1A CHUK uc001kyr.1<br/>CUTC RPS15AP5 C10orf79 C10orf46 C10orf62 FAM45A CRTAC1<br/>XPNPEP1 C10orf118 SMC3 GRK5 NHLRC2 HPS6 SFXN3 C10orf96<br/>NKX2-3 TLX1 EIF3S10 VAX1 INA SEMA4G TAF5 PITX3 PDCD4<br/>PNLI PRP1 HSPA12A PSD TRIM8 ZFYVE27 NRAP ELOVL3 SLIT1<br/>HABP2 WNT8B C10orf32 CALHM1 ZDHHC16 C10orf84 ERLIN1<br/>ABLIM1 LDB1 GFRA1 ATRNL1 RPL13AP6 PRLHR POLL DNMBP<br/>HIF1AN AS3MT SHOC2 PPAPDC1A PKD2L1 GPAM FRAT2<br/>ZDHHC6 C10orf76 C10orf65 MX1 TIAL1 PNLI PRP2 BAG3 ARL3<br/>PPRC1 RRP12 C10orf26 SH3PXD2A C10orf119 uc001ktn.1 LZTS2<br/>KCNK18 MRPL43 DCLRE1A COL17A1</p> |
| 1 | 77 | E  | 1 | 24 | E  | D | 2 | 7 | 3 | SL<br>IT        | 002 | - | -  | ATE1       | ENST00000369043 | -1  | intron8   |                                                                                                                                                                                                                                                                                                                                                                                                                                                                                                                                                                                                                                                                                                                                                                                                                                                                                                                                                                                                                                                                                                                                                                                                                                                                                                                                                                                                                                                                     |
| 0 | 88 | 88 | 0 | 8  | 8  | L | 0 | 1 | 1 | EJ              | 660 | 1 | 25 |            |                 |     |           |                                                                                                                                                                                                                                                                                                                                                                                                                                                                                                                                                                                                                                                                                                                                                                                                                                                                                                                                                                                                                                                                                                                                                                                                                                                                                                                                                                                                                                                                     |
| 2 | 02 | E  | 2 | 03 | E  | D | 9 | 3 | 3 | VN<br>TR        | N/A | N | N  | N/A        | N/A             | N/A | N/A       | N/A                                                                                                                                                                                                                                                                                                                                                                                                                                                                                                                                                                                                                                                                                                                                                                                                                                                                                                                                                                                                                                                                                                                                                                                                                                                                                                                                                                                                                                                                 |
| 0 | 61 | 61 | 0 | 67 | 67 | L | 3 | 1 | 1 | TR              | N/A | A | A  |            |                 |     |           |                                                                                                                                                                                                                                                                                                                                                                                                                                                                                                                                                                                                                                                                                                                                                                                                                                                                                                                                                                                                                                                                                                                                                                                                                                                                                                                                                                                                                                                                     |
| 5 | 50 | E  | 5 | 09 | E  | D | 9 | 3 | 3 | MM<br>EJ        | N/A | N | N  | N/A        | N/A             | N/A | N/A       | N/A                                                                                                                                                                                                                                                                                                                                                                                                                                                                                                                                                                                                                                                                                                                                                                                                                                                                                                                                                                                                                                                                                                                                                                                                                                                                                                                                                                                                                                                                 |
|   | 75 | E  |   | 75 | E  | D | 9 | 3 | 3 | MM<br>EJ        | N/A | N | N  | N/A        | N/A             | N/A | N/A       | N/A                                                                                                                                                                                                                                                                                                                                                                                                                                                                                                                                                                                                                                                                                                                                                                                                                                                                                                                                                                                                                                                                                                                                                                                                                                                                                                                                                                                                                                                                 |
|   | 52 | E  |   | 62 | E  | D | 3 | 3 | 3 | MM<br>EJ        | N/A | N | N  | N/A        | N/A             | N/A | N/A       | N/A                                                                                                                                                                                                                                                                                                                                                                                                                                                                                                                                                                                                                                                                                                                                                                                                                                                                                                                                                                                                                                                                                                                                                                                                                                                                                                                                                                                                                                                                 |
|   | 67 | 67 |   | 09 | 09 | L | 9 | 2 | 2 | EJ              | N/A | A | A  |            |                 |     |           |                                                                                                                                                                                                                                                                                                                                                                                                                                                                                                                                                                                                                                                                                                                                                                                                                                                                                                                                                                                                                                                                                                                                                                                                                                                                                                                                                                                                                                                                     |
| 1 | 04 | E  | 1 | 04 | E  | D | 9 | 3 | 3 | NH<br>EJ        | 000 | - | -  |            |                 |     |           |                                                                                                                                                                                                                                                                                                                                                                                                                                                                                                                                                                                                                                                                                                                                                                                                                                                                                                                                                                                                                                                                                                                                                                                                                                                                                                                                                                                                                                                                     |
| 8 | +0 | 8  | 1 | +0 | 8  | L | 8 | 2 | 2 | EJ              | 003 | 1 | 1  |            |                 |     |           |                                                                                                                                                                                                                                                                                                                                                                                                                                                                                                                                                                                                                                                                                                                                                                                                                                                                                                                                                                                                                                                                                                                                                                                                                                                                                                                                                                                                                                                                     |
|   | 8  | 8  | 8 | 8  | 8  | L | 8 | 2 | 2 | EJ              | 785 | 1 | 1  |            |                 |     |           |                                                                                                                                                                                                                                                                                                                                                                                                                                                                                                                                                                                                                                                                                                                                                                                                                                                                                                                                                                                                                                                                                                                                                                                                                                                                                                                                                                                                                                                                     |
| 3 | 26 | E  | 3 | 26 | E  | D | 8 | 3 | 3 | NH<br>EJ        | N/A | N | N  | ZNF148     | ENST00000360647 | -1  | intron4   | N/A                                                                                                                                                                                                                                                                                                                                                                                                                                                                                                                                                                                                                                                                                                                                                                                                                                                                                                                                                                                                                                                                                                                                                                                                                                                                                                                                                                                                                                                                 |
|   | 8  | 8  | 3 | 8  | 8  | L | 2 | 2 | 2 | EJ              | N/A | A | A  |            |                 |     |           |                                                                                                                                                                                                                                                                                                                                                                                                                                                                                                                                                                                                                                                                                                                                                                                                                                                                                                                                                                                                                                                                                                                                                                                                                                                                                                                                                                                                                                                                     |
|   | 00 | E  |   | 01 | E  | D | 1 | 7 | 3 | SF<br>BT        | 000 | - | -  |            |                 |     |           |                                                                                                                                                                                                                                                                                                                                                                                                                                                                                                                                                                                                                                                                                                                                                                                                                                                                                                                                                                                                                                                                                                                                                                                                                                                                                                                                                                                                                                                                     |
| 3 | 21 | E  | 3 | 39 | E  | D | 4 | 3 | 3 | MM<br>EJ        | 003 | 1 | 0  | SFMBT1     | ENST00000394750 | -1  | intron0   | N/A                                                                                                                                                                                                                                                                                                                                                                                                                                                                                                                                                                                                                                                                                                                                                                                                                                                                                                                                                                                                                                                                                                                                                                                                                                                                                                                                                                                                                                                                 |
|   | 87 | E  |   | 38 | E  | D | 2 | 2 | 2 | EJ              | 947 | 1 | 0  |            |                 |     |           |                                                                                                                                                                                                                                                                                                                                                                                                                                                                                                                                                                                                                                                                                                                                                                                                                                                                                                                                                                                                                                                                                                                                                                                                                                                                                                                                                                                                                                                                     |
|   | 1  | E  |   | 1  | E  | D | 2 | 2 | 2 | MM<br>EJ        | N/A | N | N  | N/A        | N/A             | N/A | N/A       | N/A                                                                                                                                                                                                                                                                                                                                                                                                                                                                                                                                                                                                                                                                                                                                                                                                                                                                                                                                                                                                                                                                                                                                                                                                                                                                                                                                                                                                                                                                 |
| 2 | +0 | 8  | 1 | +0 | 8  | L | 2 | 3 | 3 | EJ              | N/A | A | A  |            |                 |     |           |                                                                                                                                                                                                                                                                                                                                                                                                                                                                                                                                                                                                                                                                                                                                                                                                                                                                                                                                                                                                                                                                                                                                                                                                                                                                                                                                                                                                                                                                     |





|        |                      |                      |        |                            |                            |                  |                       |                                                                         |    |    |          |              |                                     |                       |                       |        |                 |     |         |                                                                                                                     |
|--------|----------------------|----------------------|--------|----------------------------|----------------------------|------------------|-----------------------|-------------------------------------------------------------------------|----|----|----------|--------------|-------------------------------------|-----------------------|-----------------------|--------|-----------------|-----|---------|---------------------------------------------------------------------------------------------------------------------|
| 8      | 39<br>40<br>19<br>82 | 39<br>40<br>19<br>82 | 1      | 74<br>62<br>74<br>96<br>1. | 74<br>62<br>74<br>96<br>1. | C<br>T<br>X<br>A | N<br>/<br>/<br>/<br>A | B<br>R<br>C<br>3<br>5<br>B<br>R<br>C<br>3<br>5<br>B<br>R<br>C<br>3<br>7 | 1  | 1  | NH<br>EJ | N/<br>A      | N/A                                 | N<br>/<br>/<br>/<br>A | N<br>/<br>/<br>/<br>A | N/A    | N/A             | N/A | N/A     |                                                                                                                     |
| 1<br>2 | 94<br>09<br>51       | 94<br>09<br>51       | 1<br>3 | 08<br>E<br>+0<br>8<br>1.   | 08<br>E<br>+0<br>8<br>1.   | C<br>T<br>X<br>A | N<br>/<br>/<br>/<br>A | B<br>R<br>C<br>3<br>5<br>B<br>R<br>C<br>3<br>7                          | -1 | -1 | MM<br>EJ | N/<br>A      | N/A                                 | N<br>/<br>/<br>/<br>A | N<br>/<br>/<br>/<br>A | N/A    | N/A             | N/A | N/A     |                                                                                                                     |
| X      | 26<br>E<br>+0<br>8   | 26<br>E<br>+0<br>8   | X      | 1.<br>E<br>+0<br>8         | 1.<br>E<br>+0<br>8         | D<br>E<br>L      | 1<br>6<br>3<br>7      | B<br>R<br>C<br>3<br>7                                                   | 1  | 1  | NH<br>EJ | N/<br>A      | N/A                                 | N<br>/<br>/<br>/<br>A | N<br>/<br>/<br>/<br>A | N/A    | N/A             | N/A | N/A     |                                                                                                                     |
| X      | 38<br>46<br>91<br>03 | 38<br>46<br>91<br>03 | X      | 51<br>60<br>13<br>17       | 51<br>60<br>13<br>17       | IN<br>V          | 9<br>3<br>0<br>7      | B<br>R<br>C<br>3<br>7                                                   | -1 | 1  | MM<br>EJ | N/<br>A      | N/A                                 | N<br>/<br>/<br>/<br>A | N<br>/<br>/<br>/<br>A | MAGED1 | ENST00000375772 | 1   | intron0 | N/A                                                                                                                 |
| 1<br>4 | 99<br>37<br>95<br>70 | 99<br>37<br>95<br>70 | 1<br>4 | 1.<br>E<br>+0<br>8         | 1.<br>E<br>+0<br>8         | D<br>E<br>L      | 5<br>2<br>3<br>7      | B<br>R<br>C<br>3<br>7                                                   | 1  | 1  | MM<br>EJ | E<br>M<br>L1 | EN<br>ST<br>000<br>002<br>622<br>33 | 1<br>1                | intr<br>on<br>1       | RAGE   | ENST00000193029 | -1  | intron1 | DEGS2 C14orf68 DYNC1H1 BEGAIN HSP90AA2 YY1 RTL1 EVL<br>C14orf70 WDR20 WARS EML1 DIO3 DLK1 WDR25 PPP2R5C<br>SLC25A29 |
| 1<br>4 | 49<br>29<br>47<br>95 | 49<br>29<br>47<br>95 | 1<br>4 | 49<br>E<br>48<br>82        | 49<br>E<br>48<br>82        | D<br>E<br>L      | 8<br>3<br>0<br>7      | B<br>R<br>C<br>3<br>7                                                   | 1  | 1  | MM<br>EJ | N/<br>A      | N/A                                 | N<br>/<br>/<br>/<br>A | N<br>/<br>/<br>/<br>A | N/A    | N/A             | N/A | N/A     |                                                                                                                     |
| 1      | 71<br>99<br>94<br>08 | 71<br>99<br>94<br>08 | 3      | 1.<br>E<br>+0<br>8         | 1.<br>E<br>+0<br>8         | C<br>T<br>X<br>A | 7<br>3<br>A           | B<br>R<br>C<br>3<br>7                                                   | 1  | -1 | NH<br>EJ | N<br>E<br>R1 | EN<br>ST<br>000<br>003<br>577<br>31 | 1<br>3                | intr<br>on<br>3       | N/A    | N/A             | N/A | N/A     |                                                                                                                     |
| 1<br>6 | 60<br>00<br>30<br>08 | 60<br>00<br>30<br>08 | 1<br>9 | 32<br>81<br>57<br>15       | 32<br>81<br>57<br>15       | C<br>T<br>X<br>A | 7<br>3<br>A           | B<br>R<br>C<br>3<br>7                                                   | 1  | -1 | NH<br>EJ | N/<br>A      | N/A                                 | N<br>/<br>/<br>/<br>A | N<br>/<br>/<br>/<br>A | N/A    | N/A             | N/A | N/A     |                                                                                                                     |
| 1      | 64<br>25<br>63<br>30 | 64<br>25<br>63<br>30 | 3      | 1.<br>E<br>+0<br>8         | 1.<br>E<br>+0<br>8         | C<br>T<br>X<br>A | 7<br>3<br>A           | B<br>R<br>C<br>3<br>7                                                   | 1  | 1  | NH<br>EJ | R<br>O<br>R1 | EN<br>ST<br>000<br>003<br>710<br>80 | 1<br>2                | intr<br>on<br>2       | N/A    | N/A             | N/A | N/A     |                                                                                                                     |
| 1<br>1 | 29<br>E<br>+0<br>8   | 29<br>E<br>+0<br>8   | 1<br>4 | 91<br>45<br>11<br>38       | 91<br>45<br>11<br>38       | C<br>T<br>X<br>A | 7<br>3<br>A           | B<br>R<br>C<br>3<br>7                                                   | -1 | -1 | MM<br>EJ | N/<br>A      | N/A                                 | N<br>/<br>/<br>/<br>A | N<br>/<br>/<br>/<br>A | FBLN5  | ENST00000267620 | -1  | intron5 | N/A                                                                                                                 |
| 1<br>1 | 49<br>07<br>99<br>21 | 49<br>07<br>99<br>21 | 1<br>4 | 03<br>E<br>+0<br>8         | 03<br>E<br>+0<br>8         | C<br>T<br>X<br>A | 7<br>3<br>A           | B<br>R<br>C<br>3<br>7                                                   | 1  | -1 | MM<br>EJ | N/<br>A      | N/A                                 | N<br>/<br>/<br>/<br>A | N<br>/<br>/<br>/<br>A | N/A    | N/A             | N/A | N/A     |                                                                                                                     |
| 1<br>1 | 49<br>07<br>96<br>36 | 49<br>07<br>96<br>36 | 1<br>4 | 72<br>50<br>88<br>89       | 72<br>50<br>88<br>89       | C<br>T<br>X<br>A | 7<br>3<br>A           | B<br>R<br>C<br>3<br>7                                                   | -1 | 1  | NH<br>EJ | N/<br>A      | N/A                                 | N<br>/<br>/<br>/<br>A | N<br>/<br>/<br>/<br>A | ZFYVE1 | ENST00000394207 | -1  | intron7 | N/A                                                                                                                 |
| 6      | 19<br>63<br>23<br>99 | 19<br>63<br>23<br>99 | 6      | 19<br>63<br>31<br>89       | 19<br>63<br>31<br>89       | D<br>E<br>L      | 7<br>9<br>3<br>8      | B<br>R<br>C<br>3<br>8                                                   | 1  | 1  | NH<br>EJ | N/<br>A      | N/A                                 | N<br>/<br>/<br>/<br>A | N<br>/<br>/<br>/<br>A | N/A    | N/A             | N/A | N/A     |                                                                                                                     |
| 8      | 55<br>85<br>72<br>31 | 55<br>85<br>72<br>31 | 8      | 55<br>85<br>75<br>00       | 55<br>85<br>75<br>00       | D<br>E<br>L      | 2<br>6<br>3<br>7      | B<br>R<br>C<br>3<br>8                                                   | 1  | 1  | MM<br>EJ | N/<br>A      | N/A                                 | N<br>/<br>/<br>/<br>A | N<br>/<br>/<br>/<br>A | N/A    | N/A             | N/A | N/A     |                                                                                                                     |



|   |                          |                          |   |                          |                          |             |                       |             |    |    |          |                     |                                     |             |             |         |                 |     |          |                                                                                                                                                                                                                                                                                                                                                                                                                                                                                                                                                           |
|---|--------------------------|--------------------------|---|--------------------------|--------------------------|-------------|-----------------------|-------------|----|----|----------|---------------------|-------------------------------------|-------------|-------------|---------|-----------------|-----|----------|-----------------------------------------------------------------------------------------------------------------------------------------------------------------------------------------------------------------------------------------------------------------------------------------------------------------------------------------------------------------------------------------------------------------------------------------------------------------------------------------------------------------------------------------------------------|
| 1 | 43<br>04<br>24<br>61     | 43<br>04<br>24<br>61     | 1 | 43<br>04<br>66<br>58     | 43<br>04<br>66<br>58     | D<br>E<br>L | 4<br>1<br>9<br>8      | B<br>R<br>C | 1  | 1  | MM<br>EJ | N/<br>A             | N/A                                 | N<br>/<br>A | N<br>/<br>A | N/A     | N/A             | N/A | N/A      |                                                                                                                                                                                                                                                                                                                                                                                                                                                                                                                                                           |
| 2 | 70<br>38<br>45<br>24     | 70<br>38<br>45<br>24     | 2 | 70<br>40<br>19<br>20     | 70<br>40<br>19<br>20     | D<br>E<br>L | 7<br>3<br>9<br>8      | B<br>R<br>C | 1  | 1  | MM<br>EJ | N/<br>A             | N/A                                 | N<br>/<br>A | N<br>/<br>A | N/A     | N/A             | N/A | N/A      |                                                                                                                                                                                                                                                                                                                                                                                                                                                                                                                                                           |
| 8 | 52<br>66<br>77<br>22     | 52<br>66<br>77<br>22     | 8 | 74<br>11<br>44<br>92     | 74<br>11<br>44<br>92     | D<br>E<br>L | 5<br>7<br>6<br>8      | B<br>R<br>C | 1  | 1  | NH<br>EJ | P<br>X<br>D<br>NL   | EN<br>ST<br>000<br>003<br>562<br>97 | -           | intr<br>on  | TERF1   | ENST00000276602 | 1   | intron8  | N/A<br>BHLHE22 ATP6V1H CPA6 COPS5 ASPH CHCHD7 LYN NCOA2<br>PCMTD1 C8orf71 PLAG1 LRRC67 KCNB2 OPRK1 MYBL1 TERF1<br>CRH CA8 SEC11B RPS20 RAB2 SDCBP GGH EYA1 UBXN2B CHD7<br>SDR16C5 MRPL15 PRDM14 TGS1 CYP7B1 LYPLA1 MOS TRAM1<br>TRPA1 TTPA ADHFE1 PTTG3 TRIM55 MSC IMPAD1 RP1 CYP7A1<br>SNORD54 C8orf46 IFITM8P RB1CC1 C8orf44 SULF1 DNAJC5B<br>NPBWR1 SOX17 TMEM68 YTHDF3 SGK3 RGS20 VCP1P1 C8orf45<br>XKR4 LACTB2 PREX2 ST18 C8orf34 TCEA1P2 RRS1 SLC05A1<br>PENK FAM110B FAM150A TCF24 RLB1P1 NKAIN3 CSPP1 TOX<br>NSMAF ARFGEF1 ARMC1 PDE7A XKR9 MTRF1 |
| 1 | 2.<br>23<br>E<br>+0<br>8 | 2.<br>23<br>E<br>+0<br>8 | 1 | 2.<br>23<br>E<br>+0<br>8 | 2.<br>23<br>E<br>+0<br>8 | D<br>E<br>L | 8<br>8<br>9<br>3<br>7 | B<br>R<br>C | 1  | 1  | MM<br>EJ | N/<br>A             | N/A                                 | N<br>/<br>A | N<br>/<br>A | N/A     | N/A             | N/A | CNIH3    |                                                                                                                                                                                                                                                                                                                                                                                                                                                                                                                                                           |
| 8 | 1.<br>13<br>E<br>+0<br>8 | 1.<br>13<br>E<br>+0<br>8 | 8 | 1.<br>13<br>E<br>+0<br>8 | 1.<br>13<br>E<br>+0<br>8 | D<br>E<br>L | 6<br>5<br>4<br>7      | B<br>R<br>C | 1  | 1  | NH<br>EJ | N/<br>A             | N/A                                 | N<br>/<br>A | N<br>/<br>A | CSMD3   | ENST00000395717 | -1  | intron59 | N/A                                                                                                                                                                                                                                                                                                                                                                                                                                                                                                                                                       |
| 5 | 13<br>76<br>27<br>4      | 13<br>76<br>27<br>4      | 5 | 13<br>76<br>51<br>7      | 13<br>76<br>51<br>7      | D<br>E<br>L | 2<br>3<br>3<br>1      | B<br>R<br>C | 1  | 1  | NA<br>HR | CL<br>PT<br>M<br>1L | 000<br>003<br>208<br>95             | -           | intr<br>on  | CLPTM1L | ENST00000320895 | -1  | intron12 | N/A                                                                                                                                                                                                                                                                                                                                                                                                                                                                                                                                                       |
| 1 | 1.<br>24<br>E<br>+0<br>8 | 1.<br>24<br>E<br>+0<br>8 | 1 | 1.<br>24<br>E<br>+0<br>8 | 1.<br>24<br>E<br>+0<br>8 | D<br>E<br>L | 1<br>4<br>3<br>7      | B<br>R<br>C | 1  | 1  | NA<br>HR | A<br>A<br>C<br>S    | 000<br>003<br>165<br>19             | 1           | intr<br>on  | AACS    | ENST00000316519 | 1   | intron9  | N/A                                                                                                                                                                                                                                                                                                                                                                                                                                                                                                                                                       |
| 6 | 19<br>11<br>26<br>68     | 19<br>11<br>26<br>68     | 6 | 19<br>11<br>60<br>70     | 19<br>11<br>60<br>70     | D<br>E<br>L | 3<br>3<br>9<br>2      | B<br>R<br>C | 1  | 1  | MM<br>EJ | N/<br>A             | N/A                                 | N<br>/<br>A | N<br>/<br>A | N/A     | N/A             | N/A | N/A      |                                                                                                                                                                                                                                                                                                                                                                                                                                                                                                                                                           |
| 8 | 1.<br>13<br>E<br>+0<br>8 | 1.<br>13<br>E<br>+0<br>8 | X | 1.<br>18<br>E<br>+0<br>8 | 1.<br>18<br>E<br>+0<br>8 | C<br>T<br>X | N<br>/<br>A           | B<br>R<br>C | 1  | -1 | MM<br>EJ | N/<br>A             | N/A                                 | N<br>/<br>A | N<br>/<br>A | DOCK11  | ENST00000276202 | 1   | intron30 | N/A                                                                                                                                                                                                                                                                                                                                                                                                                                                                                                                                                       |
| 5 | 90<br>58<br>37<br>25     | 90<br>58<br>37<br>25     | 9 | 82<br>93<br>83<br>66     | 82<br>93<br>83<br>66     | C<br>T<br>X | N<br>/<br>A           | B<br>R<br>C | 1  | 1  | NH<br>EJ | N/<br>A             | N/A                                 | N<br>/<br>A | N<br>/<br>A | N/A     | N/A             | N/A | N/A      |                                                                                                                                                                                                                                                                                                                                                                                                                                                                                                                                                           |
| 1 | 73<br>61<br>75           | 73<br>61<br>75           | 1 | 73<br>62<br>70           | 73<br>62<br>70           | D<br>E<br>L | 8<br>3<br>7           | B<br>R<br>C | 1  | 1  | NA<br>HR | H<br>A<br>G<br>HL   | 000<br>003<br>897<br>01             | 1           | intr<br>on  | HAGHL   | ENST00000389701 | 1   | intron6  | N/A                                                                                                                                                                                                                                                                                                                                                                                                                                                                                                                                                       |
| 1 | 66<br>78<br>52<br>61     | 66<br>78<br>52<br>61     | 2 | 27<br>39<br>57<br>53     | 27<br>39<br>57<br>53     | C<br>T<br>X | N<br>/<br>A           | B<br>R<br>C | 1  | -1 | NH<br>EJ | N/<br>A             | N/A                                 | N<br>/<br>A | N<br>/<br>A | TTC28   | ENST00000397906 | -1  | intron1  | N/A                                                                                                                                                                                                                                                                                                                                                                                                                                                                                                                                                       |
| 8 | 1.<br>37<br>E<br>+0<br>8 | 1.<br>37<br>E<br>+0<br>8 | 1 | 1.<br>68<br>X<br>77      | 1.<br>68<br>X<br>77      | C<br>T<br>D | N<br>/<br>A           | B<br>R<br>C | -1 | 1  | VN<br>TR | N/<br>A             | N/A                                 | N<br>/<br>A | N<br>/<br>A | NINJ2   | ENST00000305108 | -1  | intron1  | N/A                                                                                                                                                                                                                                                                                                                                                                                                                                                                                                                                                       |
| 1 | 32<br>86<br>24           | 32<br>86<br>24           | 1 | 32<br>86<br>76           | 32<br>86<br>76           | D<br>E<br>L | 4<br>4<br>9           | B<br>R<br>C | 1  | 1  | NH<br>EJ | N/<br>A             | N/A                                 | N<br>/<br>A | N<br>/<br>A | N/A     | N/A             | N/A | N/A      |                                                                                                                                                                                                                                                                                                                                                                                                                                                                                                                                                           |
| 5 | 86<br>24                 | 86<br>24                 | 5 | 86<br>76                 | 86<br>76                 | D<br>E<br>L | 4<br>4<br>9           | B<br>R<br>C | 1  | 1  | NH<br>EJ | N/<br>A             | N/A                                 | N<br>/<br>A | N<br>/<br>A | N/A     | N/A             | N/A | N/A      |                                                                                                                                                                                                                                                                                                                                                                                                                                                                                                                                                           |



|   |                                                                      |                                                                      |                                                                      |                                                                      |             |                                                                                                            |                  |   |   |          |                  |                                            |                  |                  |        |                 |     |         |                                                                                                                                                                                                                                                                                                                                                                                                                                                                                                                                                                                                                                                                                         |
|---|----------------------------------------------------------------------|----------------------------------------------------------------------|----------------------------------------------------------------------|----------------------------------------------------------------------|-------------|------------------------------------------------------------------------------------------------------------|------------------|---|---|----------|------------------|--------------------------------------------|------------------|------------------|--------|-----------------|-----|---------|-----------------------------------------------------------------------------------------------------------------------------------------------------------------------------------------------------------------------------------------------------------------------------------------------------------------------------------------------------------------------------------------------------------------------------------------------------------------------------------------------------------------------------------------------------------------------------------------------------------------------------------------------------------------------------------------|
| 8 | 1.<br>33<br>E<br>+0<br>8                                             | 1.<br>33<br>E<br>+0<br>8                                             | 1.<br>38<br>+0<br>8                                                  | 1.<br>33<br>E<br>+0<br>8                                             | D<br>E<br>L | 1<br>0<br>6<br>5<br>3<br>9<br>2<br>3<br>7<br>8<br>0<br>9<br>0<br>5<br>5<br>8<br>9<br>1<br>4<br>2<br>7<br>1 | B<br>R<br>C<br>4 | 1 | 1 | MM<br>EJ | N/<br>A          | N/A<br>EN<br>ST<br>000<br>003<br>562<br>64 | N<br>/<br>A<br>A | N/<br>A<br>A     | EFR3A  | ENST00000254624 | 1   | intron1 | N/A                                                                                                                                                                                                                                                                                                                                                                                                                                                                                                                                                                                                                                                                                     |
| 7 | 38<br>45<br>95<br>41                                                 | 38<br>45<br>95<br>41                                                 | 39<br>38<br>43<br>23                                                 | 39<br>38<br>43<br>23                                                 | D<br>E<br>L | 3<br>3<br>7<br>8<br>0<br>9<br>0<br>5<br>5<br>8<br>9<br>1<br>4<br>2<br>7<br>1                               | B<br>R<br>C<br>4 | 1 | 1 | NH<br>EJ | A<br>M<br>P<br>H | A<br>M<br>P<br>H                           | -<br>1           | intr<br>on<br>11 | POU6F2 | ENST00000403058 | 1   | intron5 | FAM183B VPS41                                                                                                                                                                                                                                                                                                                                                                                                                                                                                                                                                                                                                                                                           |
| 7 | 38<br>46<br>56<br>92                                                 | 38<br>46<br>56<br>92                                                 | 39<br>37<br>21<br>99                                                 | 39<br>37<br>21<br>99                                                 | D<br>E<br>L | 3<br>3<br>7<br>8<br>0<br>9<br>0<br>5<br>5<br>8<br>9<br>1<br>4<br>2<br>7<br>1                               | B<br>R<br>C<br>4 | 1 | 1 | NH<br>EJ | A<br>M<br>P<br>H | A<br>M<br>P<br>H                           | -<br>1           | intr<br>on<br>11 | POU6F2 | ENST00000403058 | 1   | intron5 | FAM183B VPS41                                                                                                                                                                                                                                                                                                                                                                                                                                                                                                                                                                                                                                                                           |
| 1 | 56<br>36<br>32<br>15<br>1.<br>1.<br>16<br>E<br>+0<br>8               | 56<br>36<br>32<br>15<br>1.<br>1.<br>16<br>E<br>+0<br>8               | 56<br>95<br>33<br>62<br>1.<br>1.<br>16<br>E<br>+0<br>8               | 56<br>95<br>33<br>62<br>1.<br>1.<br>16<br>E<br>+0<br>8               | D<br>E<br>L | 3<br>1<br>6<br>6<br>8<br>8<br>1<br>4<br>2<br>7<br>1                                                        | B<br>R<br>C<br>4 | 1 | 1 | MM<br>EJ | N/<br>A          | N/A                                        | N<br>/<br>A<br>A | N/<br>A<br>A     | N/A    | N/A             | N/A | N/A     | OR5AK2 P2RX3 PRG3 OR5AK3P SSRP1 SLC43A3 APLNR LRRCS5 PRG2 TNKS1BP1                                                                                                                                                                                                                                                                                                                                                                                                                                                                                                                                                                                                                      |
| 2 | 16<br>E<br>+0<br>8                                                   | 16<br>E<br>+0<br>8                                                   | 16<br>E<br>+0<br>8                                                   | 16<br>E<br>+0<br>8                                                   | D<br>E<br>L | 3<br>1<br>6<br>6<br>8<br>8<br>1<br>4<br>2<br>7<br>1                                                        | B<br>R<br>C<br>4 | 1 | 1 | NH<br>EJ | N/<br>A          | N/A                                        | N<br>/<br>A<br>A | N/<br>A<br>A     | N/A    | N/A             | N/A | N/A     | N/A<br>BHLHE22 ATP6V1H CPA6 COPS5 PKIA C8orf84 ASPH CHCHD7 LYN NCOA2 FAM164A PCMTD1 C8orf71 PXDNL PLAG1 LRRRC67 KCN2 OPRK1 JPH1 MYBL1 TERF1 CRH CA8 SEC11B LY96 RPS20 RAB2 SDCBP GGH EYA1 UBXN2B TCEB1 CHD7 SDR16C5 EFCAB1 CRISPLD1 MRPL15 TMEM70 PRDM14 TGS1 CYP7B1 LYPLA1 MOS PXMP3 TRAM1 ZFHx4 TRPA1 TTPA ADHFE1 RDH10 RPL7 PTTG3 TRIM55 IL7 MSC IMPAD1 RP1 CYP7A1 SNORD54 C8orf46 IFITM8P RB1CC1 C8orf44 SULF1 DNAJC5B NPBWIR1 STAU2 SOX17 TMEM88 YTHDF3 SGK3 UBE2W C8orf45 RGS20 VCPPI1 HEY1 XKR4 STMN2 LACTB2 PREX2 ST18 SNTG1 C8orf34 P15 TCEA1P2 RRS1 HNF4G SLC05A1 PENK FAM110B FAM150A C8orf22 TCF24 RLBPL11 CSPP1 NKAIN3 SNAI2 NSMAF TOX ARFGF1 ARMC1 PDE7A XKR9 GDAP1 MTFR1 |
| 8 | 49<br>36<br>34<br>88                                                 | 49<br>36<br>34<br>88                                                 | 81<br>03<br>26<br>53                                                 | 81<br>03<br>26<br>53                                                 | D<br>E<br>L | 3<br>1<br>6<br>6<br>8<br>8<br>1<br>4<br>2<br>7<br>1                                                        | B<br>R<br>C<br>4 | 1 | 1 | MM<br>EJ | N/<br>A          | N/A                                        | N<br>/<br>A<br>A | N/<br>A<br>A     | MRPS28 | ENST00000276585 | -1  | intron2 | N/A                                                                                                                                                                                                                                                                                                                                                                                                                                                                                                                                                                                                                                                                                     |
| 1 | 57<br>42<br>77<br>46<br>49<br>26<br>80<br>15<br>85<br>35<br>02<br>16 | 57<br>42<br>77<br>46<br>49<br>26<br>80<br>15<br>85<br>35<br>02<br>16 | 59<br>07<br>80<br>82<br>49<br>26<br>10<br>04<br>10<br>89<br>15<br>56 | 59<br>07<br>80<br>82<br>49<br>26<br>10<br>04<br>10<br>89<br>15<br>56 | D<br>E<br>L | 3<br>1<br>6<br>6<br>8<br>8<br>1<br>4<br>2<br>7<br>1                                                        | B<br>R<br>C<br>4 | 1 | 1 | NH<br>EJ | N/<br>A          | N/A                                        | N<br>/<br>A<br>A | N/<br>A<br>A     | N/A    | N/A             | N/A | N/A     | FAM111B OR6Q1 OR5A2 OR1S1 DTX4 ZFP91 LPXN GLYATL1 OR5AZ1P OR5B17 OR5AN1 GLYATL2 OR10Q1 OR1S2 OR4D11 OR5B12 OR9Q1 FAM111A GLYAT OR5B3 OR4D6 OR9Q2 OR10W1 MPEG1 OR9I1 OR5B21 OR5B2 OR4D9 OR5A1                                                                                                                                                                                                                                                                                                                                                                                                                                                                                            |
| 7 | 49<br>26<br>80<br>15<br>85<br>35<br>02<br>16                         | 49<br>26<br>80<br>15<br>85<br>35<br>02<br>16                         | 86<br>26<br>10<br>04<br>10<br>89<br>15<br>56                         | 86<br>26<br>10<br>04<br>10<br>89<br>15<br>56                         | D<br>E<br>L | 3<br>1<br>6<br>6<br>8<br>8<br>1<br>4<br>2<br>7<br>1                                                        | B<br>R<br>C<br>4 | 1 | 1 | MM<br>EJ | N/<br>A          | N/A                                        | N<br>/<br>A<br>A | N/<br>A<br>A     | N/A    | N/A             | N/A | N/A     | N/A                                                                                                                                                                                                                                                                                                                                                                                                                                                                                                                                                                                                                                                                                     |
| 4 | 44<br>06<br>23<br>8<br>12<br>04<br>48<br>80                          | 44<br>06<br>23<br>8<br>12<br>04<br>48<br>80                          | 56<br>2<br>+0<br>8<br>91<br>81<br>51<br>9                            | 56<br>2<br>+0<br>8<br>91<br>81<br>51<br>9                            | C<br>N<br>X | 3<br>1<br>6<br>6<br>8<br>8<br>1<br>4<br>2<br>7<br>1                                                        | B<br>R<br>C<br>4 | 1 | 1 | MM<br>EJ | N/<br>A          | N/A                                        | N<br>/<br>A<br>A | N/<br>A<br>A     | N/A    | N/A             | N/A | N/A     | N/A                                                                                                                                                                                                                                                                                                                                                                                                                                                                                                                                                                                                                                                                                     |
| 6 | 81<br>85<br>82<br>49                                                 | 81<br>85<br>82<br>49                                                 | 81<br>84<br>84<br>09                                                 | 81<br>84<br>84<br>09                                                 | D<br>E<br>L | 3<br>1<br>6<br>6<br>8<br>8<br>1<br>4<br>2<br>7<br>1                                                        | B<br>R<br>C<br>4 | 1 | 1 | NH<br>EJ | N/<br>A          | N/A                                        | N<br>/<br>A<br>A | N/<br>A<br>A     | N/A    | N/A             | N/A | N/A     | N/A                                                                                                                                                                                                                                                                                                                                                                                                                                                                                                                                                                                                                                                                                     |
| X | 22<br>E<br>+0<br>8                                                   | 22<br>E<br>+0<br>8                                                   | 22<br>E<br>+0<br>8                                                   | 22<br>E<br>+0<br>8                                                   | D<br>E<br>L | 3<br>1<br>6<br>6<br>8<br>8<br>1<br>4<br>2<br>7<br>1                                                        | B<br>R<br>C<br>4 | 1 | 1 | MM<br>EJ | M<br>R<br>P<br>L | 000<br>003<br>061<br>85                    | -<br>1           | intr<br>on<br>2  | MRPL13 | ENST00000306185 | -1  | intron2 | N/A                                                                                                                                                                                                                                                                                                                                                                                                                                                                                                                                                                                                                                                                                     |

|   |                      |                      |                      |                      |             |                       |                                      |   |   |          |                  |                                 |             |                           |     |          |     |                 |
|---|----------------------|----------------------|----------------------|----------------------|-------------|-----------------------|--------------------------------------|---|---|----------|------------------|---------------------------------|-------------|---------------------------|-----|----------|-----|-----------------|
| 8 | 1.07<br>E<br>+0<br>8 | 1.07<br>E<br>+0<br>8 | 1.07<br>E<br>+0<br>8 | 1.07<br>E<br>+0<br>8 | D<br>E<br>L | 9<br>1<br>1<br>4<br>9 | B<br>R<br>C<br>1<br>B<br>R<br>C      | 1 | 1 | MM<br>EJ | N/<br>A          | N/A                             | N<br>/<br>A | N<br>/<br>A               | N/A | N/A      | N/A | N/A             |
| 5 | 1.55<br>E<br>+0<br>8 | 1.55<br>E<br>+0<br>8 | 1.55<br>E<br>+0<br>8 | 1.55<br>E<br>+0<br>8 | D<br>E<br>L | 1<br>4<br>4<br>0      | B<br>R<br>C<br>1<br>B<br>R<br>C      | 1 | 1 | MM<br>EJ | N/<br>A          | N/A                             | N<br>/<br>A | N<br>/<br>A               | N/A | N/A      | N/A | N/A             |
| 4 | 59.55<br>23<br>6     | 59.55<br>23<br>6     | 59.55<br>23<br>6     | 59.55<br>23<br>6     | D<br>E<br>L | 2<br>6<br>4<br>5      | B<br>R<br>C<br>2<br>C<br>6<br>4<br>5 | 1 | 1 | MM<br>EJ | N/A              | ENST<br>000<br>003<br>978<br>88 | -           | intr<br>on<br>7           | -1  | intron7  | N/A | ENST00000397888 |
| 1 | 14.84<br>38<br>49    | 14.84<br>38<br>49    | 14.84<br>38<br>49    | 14.84<br>38<br>49    | D<br>E<br>L | 1<br>7<br>4<br>0      | B<br>R<br>C<br>1<br>B<br>R<br>C      | 1 | 1 | NH<br>EJ | W<br>B<br>P1     | ENST<br>000<br>002<br>611<br>67 | -           | cd<br>s_<br>ex<br>on<br>2 | -1  | intron2  | N/A | ENST00000261167 |
| 3 | 1.4E<br>+0<br>8      | 1.4E<br>+0<br>8      | 1.4E<br>+0<br>8      | 1.4E<br>+0<br>8      | D<br>E<br>L | 5<br>3<br>2<br>4      | B<br>R<br>C<br>5<br>3<br>2<br>4      | 1 | 1 | NH<br>EJ | N/<br>A          | N/A                             | N<br>/<br>A | N<br>/<br>A               | N/A | N/A      | N/A | N/A             |
| 2 | 22.65<br>96<br>47    | 22.65<br>96<br>47    | 22.65<br>96<br>47    | 22.65<br>96<br>47    | D<br>E<br>L | 4<br>8<br>4<br>5      | B<br>R<br>C<br>4<br>8<br>4<br>5      | 1 | 1 | MM<br>EJ | N/<br>A          | N/A                             | N<br>/<br>A | N<br>/<br>A               | N/A | N/A      | N/A | N/A             |
| 6 | 1.42E<br>+0<br>8     | 1.42E<br>+0<br>8     | 1.42E<br>+0<br>8     | 1.42E<br>+0<br>8     | D<br>E<br>L | 3<br>1<br>4<br>8      | B<br>R<br>C<br>3<br>1<br>4<br>8      | 1 | 1 | NH<br>EJ | N/<br>A          | N/A                             | N<br>/<br>A | N<br>/<br>A               | N/A | N/A      | N/A | N/A             |
| 1 | 78.90<br>16<br>02    | 78.90<br>16<br>02    | 78.90<br>16<br>02    | 78.90<br>16<br>02    | D<br>E<br>L | 2<br>4<br>4<br>2      | B<br>R<br>C<br>2<br>4<br>4<br>2      | 1 | 1 | NH<br>EJ | N/<br>A          | N/A                             | N<br>/<br>A | N<br>/<br>A               | N/A | N/A      | N/A | N/A             |
| 7 | 14.86<br>35<br>2.    | 14.86<br>35<br>2.    | 14.86<br>35<br>2.    | 14.86<br>35<br>2.    | D<br>E<br>L | 6<br>4<br>1<br>4      | B<br>R<br>C<br>6<br>4<br>1<br>4      | 1 | 1 | MM<br>EJ | D<br>G<br>K<br>B | ENST<br>000<br>004<br>039<br>51 | -           | intr<br>on<br>20          | -1  | intron20 | N/A | ENST00000403951 |
| 1 | 2.2E<br>+0<br>8      | 2.2E<br>+0<br>8      | 2.2E<br>+0<br>8      | 2.2E<br>+0<br>8      | D<br>E<br>L | 1<br>8<br>4<br>9      | B<br>R<br>C<br>1<br>8<br>4<br>9      | 1 | 1 | NH<br>EJ | N/<br>A          | N/A                             | N<br>/<br>A | N<br>/<br>A               | N/A | N/A      | N/A | N/A             |
| 1 | 2.14E<br>+0<br>8     | 2.14E<br>+0<br>8     | 2.14E<br>+0<br>8     | 2.14E<br>+0<br>8     | D<br>E<br>L | 4<br>4<br>4<br>2      | B<br>R<br>C<br>4<br>4<br>4<br>2      | 1 | 1 | NH<br>EJ | U<br>S<br>H2     | ENST<br>000<br>003<br>669<br>43 | -           | intr<br>on<br>37          | -1  | intron37 | N/A | ENST00000366943 |
| 4 | 20.64<br>51<br>49    | 20.64<br>51<br>49    | 20.64<br>51<br>49    | 20.64<br>51<br>49    | D<br>E<br>L | 5<br>1<br>4<br>5      | B<br>R<br>C<br>5<br>1<br>4<br>5      | 1 | 1 | NH<br>EJ | K<br>C<br>NIP4   | ENST<br>000<br>003<br>821<br>52 | -           | intr<br>on<br>1           | -1  | intron1  | N/A | ENST00000382152 |
| 1 | 1.01E<br>+0<br>8     | 1.01E<br>+0<br>8     | 1.01E<br>+0<br>8     | 1.01E<br>+0<br>8     | D<br>E<br>L | 1<br>7<br>4<br>9      | B<br>R<br>C<br>1<br>7<br>4<br>9      | 1 | 1 | MM<br>EJ | F<br>G<br>F1     | ENST<br>000<br>003<br>761<br>31 | -           | intr<br>on<br>1           | -1  | intron1  | N/A | ENST00000376131 |
| 2 | 2.21E<br>+0<br>8     | 2.21E<br>+0<br>8     | 2.21E<br>+0<br>8     | 2.21E<br>+0<br>8     | D<br>E<br>L | 5<br>3<br>4<br>1      | B<br>R<br>C<br>5<br>3<br>4<br>1      | 1 | 1 | NH<br>EJ | N/<br>A          | N/A                             | N<br>/<br>A | N<br>/<br>A               | N/A | N/A      | N/A | N/A             |

|   |                          |                          |   |                          |                          |             |             |                  |   |   |          |                        |                                     |                                     |             |        |                 |                 |          |          |     |
|---|--------------------------|--------------------------|---|--------------------------|--------------------------|-------------|-------------|------------------|---|---|----------|------------------------|-------------------------------------|-------------------------------------|-------------|--------|-----------------|-----------------|----------|----------|-----|
| 6 | 23<br>34<br>89<br>07     | 23<br>34<br>89<br>07     | 6 | 23<br>34<br>91<br>11     | 23<br>34<br>91<br>11     | D<br>E<br>L | 2<br>0<br>0 | B<br>R<br>C<br>4 | 1 | 1 | MM<br>EJ | N/<br>A                | N/A                                 | N<br>/<br>A                         | N<br>/<br>A | N/A    | N/A             | N/A             | N/A      |          |     |
| 3 | 89<br>97<br>27<br>56     | 89<br>97<br>27<br>56     | 3 | 89<br>97<br>32<br>36     | 89<br>97<br>32<br>36     | D<br>E<br>L | 4<br>7<br>6 | B<br>R<br>C<br>4 | 1 | 1 | MM<br>EJ | N/<br>A                | N/A                                 | N<br>/<br>A                         | N<br>/<br>A | N/A    | N/A             | N/A             | N/A      |          |     |
| 9 | 1.<br>03<br>E<br>+0<br>8 | 1.<br>03<br>E<br>+0<br>8 | 9 | 1.<br>03<br>E<br>+0<br>8 | 1.<br>03<br>E<br>+0<br>8 | D<br>E<br>L | 2<br>1<br>1 | B<br>R<br>C<br>4 | 1 | 1 | MM<br>EJ | R3                     | P<br>P<br>A<br>R<br>74              | EN<br>ST<br>000<br>003<br>748       | 1           | 1      | PPAPR3          | ENST00000374874 | 1        | intron1  | N/A |
| 1 | 1.<br>07<br>E<br>+0<br>8 | 1.<br>07<br>E<br>+0<br>8 | 1 | 1.<br>07<br>E<br>+0<br>8 | 1.<br>07<br>E<br>+0<br>8 | D<br>E<br>L | 4<br>6<br>4 | B<br>R<br>C<br>4 | 1 | 1 | NH<br>EJ | 1                      | N<br>T<br>G<br>76                   | EN<br>ST<br>000<br>003<br>700<br>76 | 1           | 1      | NTNG1           | ENST00000370076 | 1        | intron1  | N/A |
| 7 | 1.<br>37<br>E<br>+0<br>8 | 1.<br>37<br>E<br>+0<br>8 | 7 | 1.<br>37<br>E<br>+0<br>8 | 1.<br>37<br>E<br>+0<br>8 | D<br>E<br>L | 1<br>9<br>4 | B<br>R<br>C<br>4 | 1 | 1 | MM<br>EJ | D<br>G<br>KI           | EN<br>ST<br>000<br>002<br>884<br>90 | -                                   | 1           | 30     | DGKI            | ENST00000288490 | -1       | intron30 | N/A |
| 4 | 62<br>72<br>96<br>09     | 62<br>72<br>96<br>09     | 4 | 62<br>73<br>10<br>11     | 62<br>73<br>10<br>11     | D<br>E<br>L | 1<br>3<br>9 | B<br>R<br>C<br>4 | 1 | 1 | MM<br>EJ | N/<br>A                | N/A                                 | N<br>/<br>A                         | N<br>/<br>A | N/A    | N/A             | N/A             | N/A      |          |     |
| 5 | 1.<br>78<br>E<br>+0<br>8 | 1.<br>78<br>E<br>+0<br>8 | 5 | 1.<br>78<br>E<br>+0<br>8 | 1.<br>78<br>E<br>+0<br>8 | D<br>E<br>L | 7<br>8<br>4 | B<br>R<br>C<br>4 | 1 | 1 | NH<br>EJ | N/<br>A                | N/A                                 | N<br>/<br>A                         | N<br>/<br>A | N/A    | N/A             | N/A             | N/A      |          |     |
| 1 | 2.<br>23<br>E<br>+0<br>8 | 2.<br>23<br>E<br>+0<br>8 | 1 | 2.<br>23<br>E<br>+0<br>8 | 2.<br>23<br>E<br>+0<br>8 | D<br>E<br>L | 4<br>7<br>2 | B<br>R<br>C<br>4 | 1 | 1 | NH<br>EJ | N/<br>A                | N/A                                 | N<br>/<br>A                         | N<br>/<br>A | N/A    | N/A             | N/A             | N/A      |          |     |
| 4 | 1.<br>74<br>E<br>+0<br>8 | 1.<br>74<br>E<br>+0<br>8 | 4 | 1.<br>74<br>E<br>+0<br>8 | 1.<br>74<br>E<br>+0<br>8 | D<br>E<br>L | 5<br>6<br>8 | B<br>R<br>C<br>4 | 1 | 1 | NH<br>EJ | G<br>A<br>L<br>N<br>T7 | EN<br>ST<br>000<br>002<br>650<br>00 | 1                                   | 1           | GALNT7 | ENST00000265000 | 1               | intron2  | N/A      |     |
| 3 | 1.<br>9E<br>+0<br>8      | 1.<br>9E<br>+0<br>8      | 3 | 1.<br>9E<br>+0<br>8      | 1.<br>9E<br>+0<br>8      | D<br>E<br>L | 5<br>2<br>4 | B<br>R<br>C<br>4 | 1 | 1 | NH<br>EJ | N/<br>A                | N/A                                 | N<br>/<br>A                         | N<br>/<br>A | N/A    | N/A             | N/A             | N/A      |          |     |
| 6 | 1.<br>68<br>E<br>+0<br>8 | 1.<br>68<br>E<br>+0<br>8 | 6 | 1.<br>68<br>E<br>+0<br>8 | 1.<br>68<br>E<br>+0<br>8 | D<br>E<br>L | 6<br>0<br>4 | B<br>R<br>C<br>4 | 1 | 1 | NH<br>EJ | M<br>L<br>L<br>T4      | EN<br>ST<br>000<br>003<br>668<br>09 | 1                                   | 1           | MLLT4  | ENST00000366809 | 1               | intron19 | N/A      |     |
| 1 | 20<br>58<br>16<br>11     | 20<br>58<br>16<br>11     | 1 | 20<br>59<br>78<br>61     | 20<br>59<br>78<br>61     | D<br>E<br>L | 6<br>2<br>4 | B<br>R<br>C<br>4 | 1 | 1 | MM<br>EJ | N/<br>A                | N/A                                 | N<br>/<br>A                         | N<br>/<br>A | N/A    | N/A             | N/A             | N/A      |          |     |
| 5 | 94<br>18<br>95<br>23     | 94<br>18<br>95<br>23     | 5 | 94<br>18<br>96<br>68     | 94<br>18<br>96<br>68     | D<br>E<br>L | 1<br>4<br>4 | B<br>R<br>C<br>4 | 1 | 1 | MM<br>EJ | N/<br>A                | N/A                                 | N<br>/<br>A                         | N<br>/<br>A | N/A    | N/A             | N/A             | N/A      |          |     |
| 7 | 84<br>55<br>71<br>79     | 84<br>55<br>71<br>79     | 7 | 84<br>55<br>75<br>37     | 84<br>55<br>75<br>37     | D<br>E<br>L | 3<br>5<br>4 | B<br>R<br>C<br>4 | 1 | 1 | NH<br>EJ | S<br>E<br>M<br>A3<br>D | EN<br>ST<br>000<br>002<br>841<br>36 | -                                   | 1           | 2      | SEMA3D          | ENST00000284136 | -1       | intron2  | N/A |



|   |                      |                      |                      |                      |             |                  |   |   |          |                             |                                            |             |                 |          |                 |     |         |     |
|---|----------------------|----------------------|----------------------|----------------------|-------------|------------------|---|---|----------|-----------------------------|--------------------------------------------|-------------|-----------------|----------|-----------------|-----|---------|-----|
| 6 | 1.34<br>E<br>+0<br>8 | 1.34<br>E<br>+0<br>8 | 1.34<br>E<br>+0<br>8 | 1.34<br>E<br>+0<br>8 | D<br>E<br>L | 1<br>6<br>9      | 1 | 1 | NH<br>EJ | N/<br>A                     | N/A<br>EN<br>ST<br>000<br>004<br>096<br>64 | N<br>/<br>A | N<br>/<br>A     | N/A      | N/A             | N/A | N/A     |     |
| 2 | 1.66<br>E<br>+0<br>8 | 1.66<br>E<br>+0<br>8 | 1.66<br>E<br>+0<br>8 | 1.66<br>E<br>+0<br>8 | D<br>E<br>L | 4<br>4<br>7      | 1 | 1 | NH<br>EJ | C<br>S<br>R<br>N<br>P3      | EN<br>ST<br>000<br>004<br>096<br>64        | 1           | intr<br>on<br>0 | CSRNP3   | ENST00000409664 | 1   | intron0 | N/A |
| 1 | 67<br>45<br>49<br>46 | 67<br>45<br>49<br>46 | 67<br>45<br>72<br>91 | 67<br>45<br>72<br>91 | D<br>E<br>L | 2<br>3<br>4<br>5 | 1 | 1 | NH<br>EJ | IL<br>23<br>R               | EN<br>ST<br>000<br>003<br>473<br>10        | 1           | intr<br>on<br>5 | IL23R    | ENST00000347310 | 1   | intron5 | N/A |
| 3 | 45<br>32<br>51<br>34 | 45<br>32<br>51<br>34 | 45<br>32<br>53<br>55 | 45<br>32<br>53<br>55 | D<br>E<br>L | 2<br>2<br>2<br>0 | 1 | 1 | NH<br>EJ | N/<br>A                     | N/A<br>EN<br>ST<br>000<br>003<br>669<br>35 | N<br>/<br>A | N<br>/<br>A     | N/A      | N/A             | N/A | N/A     |     |
| 1 | 2.16<br>E<br>+0<br>8 | 2.16<br>E<br>+0<br>8 | 2.16<br>E<br>+0<br>8 | 2.16<br>E<br>+0<br>8 | D<br>E<br>L | 3<br>4<br>7      | 1 | 1 | MM<br>EJ | G<br>P<br>A<br>T<br>C<br>H2 | EN<br>ST<br>000<br>003<br>669<br>35        | -           | intr<br>on<br>6 | GPATCH2  | ENST00000366935 | -1  | intron6 | N/A |
| 3 | 60<br>85<br>31<br>32 | 60<br>85<br>31<br>32 | 60<br>85<br>39<br>60 | 60<br>85<br>39<br>60 | D<br>E<br>L | 8<br>2<br>2<br>6 | 1 | 1 | MM<br>EJ | N/<br>A                     | N/A                                        | N<br>/<br>A | N<br>/<br>A     | N/A      | N/A             | N/A | N/A     |     |
| 5 | 10<br>82<br>55<br>23 | 10<br>82<br>55<br>23 | 10<br>82<br>76<br>02 | 10<br>82<br>76<br>02 | D<br>E<br>L | 2<br>0<br>7<br>4 | 1 | 1 | MM<br>EJ | N/<br>A                     | N/A                                        | N<br>/<br>A | N<br>/<br>A     | N/A      | N/A             | N/A | N/A     |     |
| 2 | 16<br>73<br>27<br>04 | 16<br>73<br>27<br>04 | 16<br>73<br>92<br>11 | 16<br>73<br>92<br>11 | D<br>E<br>L | 6<br>4<br>2<br>1 | 1 | 1 | MM<br>EJ | N/<br>A                     | N/A                                        | N<br>/<br>A | N<br>/<br>A     | N/A      | N/A             | N/A | N/A     |     |
| 8 | 98<br>41<br>59<br>23 | 98<br>41<br>59<br>23 | 98<br>42<br>30<br>14 | 98<br>42<br>30<br>14 | D<br>E<br>L | 7<br>0<br>8<br>1 | 1 | 1 | MM<br>EJ | N/<br>A                     | N/A                                        | N<br>/<br>A | N<br>/<br>A     | N/A      | N/A             | N/A | N/A     |     |
| 1 | 50<br>36<br>60<br>60 | 50<br>36<br>60<br>60 | 50<br>36<br>62<br>13 | 50<br>36<br>62<br>13 | D<br>E<br>L | 1<br>4<br>4<br>9 | 1 | 1 | MM<br>EJ | N/<br>A                     | N/A                                        | N<br>/<br>A | N<br>/<br>A     | N/A      | N/A             | N/A | N/A     |     |
| 4 | 1.06<br>E<br>+0<br>8 | 1.06<br>E<br>+0<br>8 | 1.06<br>E<br>+0<br>8 | 1.06<br>E<br>+0<br>8 | D<br>E<br>L | 9<br>0<br>6<br>5 | 1 | 1 | NH<br>EJ | N/<br>A                     | N/A                                        | N<br>/<br>A | N<br>/<br>A     | N/A      | N/A             | N/A | N/A     |     |
| 4 | 1.17<br>E<br>+0<br>8 | 1.17<br>E<br>+0<br>8 | 1.17<br>E<br>+0<br>8 | 1.17<br>E<br>+0<br>8 | D<br>E<br>L | 4<br>5<br>4<br>1 | 1 | 1 | MM<br>EJ | N/<br>A                     | N/A                                        | N<br>/<br>A | N<br>/<br>A     | N/A      | N/A             | N/A | N/A     |     |
| 4 | 44<br>06<br>95<br>16 | 44<br>06<br>95<br>16 | 44<br>07<br>89<br>27 | 44<br>07<br>89<br>27 | D<br>E<br>L | 9<br>4<br>1<br>2 | 1 | 1 | NH<br>EJ | K<br>C<br>D<br>T8           | EN<br>ST<br>000<br>003<br>600<br>29        | -           | intr<br>on<br>1 | KCTD8    | ENST00000360029 | -1  | intron1 | N/A |
| 7 | 1.41<br>E<br>+0<br>8 | 1.41<br>E<br>+0<br>8 | 1.41<br>E<br>+0<br>8 | 1.41<br>E<br>+0<br>8 | D<br>E<br>L | 0<br>4<br>3<br>4 | 1 | 1 | MM<br>EJ | KI<br>A<br>A1<br>14         | EN<br>ST<br>000<br>002<br>977<br>61        | -           | intr<br>on<br>4 | KIAA1147 | ENST00000297761 | -1  | intron3 | N/A |
| 2 | 17<br>17             | 17<br>17             | 17<br>17             | 17<br>17             | D<br>E<br>L | 1<br>4<br>4<br>C | 1 | 1 | MM<br>EJ | N/<br>A                     | N/A                                        | N<br>/<br>A | N<br>/<br>A     | N/A      | N/A             | N/A | N/A     |     |





1  
1

PRKAR2B C7orf66 AASS RPL31P37 IRF5 ATXN7L1 ST7OT4 FSCN3  
 PBEF1 COPG2 FOXP2 ZC3HC1 EFCAB10 WNT16 LMOD2 NDUFA5  
 PIK3CG CFTR ANKRD7 COG5 KLF14 RNF133 CADPS2 SYPL1  
 TSGA14 KCP SLC26A4 FAM71F2 DOCK4 FAM40B C7orf58 CAV2  
 TSPAN3 ST7 SND1 CTTNBP2 MET MEST IMP2L TES ING3  
 CAV1 DLD CAPZA2 KCND2 RINT1 TSPAN12 PNPLA8 THAP5  
 METTL2B ASB15 SLC13A1 BCAP29 uc003vdi.2 CPA5 TNPO3 PAX4  
 HYAL4 C7orf60 UBE2H GPR37 LRRN3 NRF1 LRRC4 WNT2 LEP  
 POT1 MLL5 TMEM209 ASZ1 KLHDC10 ZNF800 LAMB4 SRPK2

|   |                         |                         |   |                         |                         |             |                            |                       |   |   |          |                       |                                                        |             |             |            |            |                 |                 |         |         |     |
|---|-------------------------|-------------------------|---|-------------------------|-------------------------|-------------|----------------------------|-----------------------|---|---|----------|-----------------------|--------------------------------------------------------|-------------|-------------|------------|------------|-----------------|-----------------|---------|---------|-----|
| 3 | 1<br>57<br>E<br>+0<br>8 | 1<br>57<br>E<br>+0<br>8 | 3 | 1<br>57<br>E<br>+0<br>8 | 1<br>57<br>E<br>+0<br>8 | D<br>E<br>L | 2<br>3<br>2<br>1<br>4<br>6 | B<br>R<br>C<br>C<br>1 | 1 | 1 | MM<br>EJ | N/<br>A               | N/A                                                    | N<br>/<br>A | N<br>/<br>A | N/A        | N/A        | N/A             | N/A             |         |         |     |
| 7 | 27<br>98<br>64<br>90    | 27<br>98<br>64<br>90    | 7 | 27<br>98<br>64<br>90    | 27<br>98<br>64<br>90    | D<br>E<br>L | 7<br>6<br>7<br>1           | B<br>R<br>C<br>C<br>1 | 1 | 1 | NH<br>EJ | JA<br>ZF<br>1         | N/A<br>EN<br>ST<br>000<br>002<br>839<br>28             | -           | 1           | 2          | intr<br>on | JAZF1           | ENST00000283928 | -1      | intron2 | N/A |
| 6 | 15<br>90<br>30<br>58    | 15<br>90<br>30<br>58    | 6 | 15<br>90<br>30<br>58    | 15<br>90<br>30<br>58    | D<br>E<br>L | 1<br>1<br>3<br>5<br>4<br>8 | B<br>R<br>C<br>C<br>1 | 1 | 1 | MM<br>EJ | N/<br>A               | N/A                                                    | N<br>/<br>A | N<br>/<br>A | N/A        | N/A        | N/A             | N/A             | N/A     | N/A     | N/A |
| 6 | 60<br>99<br>33<br>68    | 60<br>99<br>33<br>68    | 6 | 60<br>99<br>33<br>68    | 61<br>01<br>01<br>16    | D<br>E<br>L | 1<br>6<br>7<br>3<br>4<br>7 | B<br>R<br>C<br>C<br>1 | 1 | 1 | MM<br>EJ | N/<br>A               | N/A                                                    | N<br>/<br>A | N<br>/<br>A | N/A        | N/A        | N/A             | N/A             | N/A     | N/A     | N/A |
| 8 | 31<br>92<br>24<br>45    | 31<br>92<br>24<br>45    | 8 | 31<br>92<br>24<br>45    | 31<br>92<br>30<br>00    | D<br>E<br>L | 5<br>4<br>4<br>9           | B<br>R<br>C<br>C<br>1 | 1 | 1 | MM<br>EJ | N<br>R<br>G<br>1      | N/A<br>EN<br>ST<br>000<br>004<br>056<br>06             | 1           | 1           | intr<br>on | NRG1       | ENST00000405606 | 1               | intron1 | N/A     |     |
| 2 | 71<br>80<br>74<br>83    | 71<br>80<br>74<br>83    | 2 | 71<br>80<br>74<br>83    | 71<br>80<br>78<br>44    | D<br>E<br>L | 3<br>3<br>6<br>4<br>1      | B<br>R<br>C<br>C<br>1 | 1 | 1 | NH<br>EJ | N/<br>A               | N/A                                                    | N<br>/<br>A | N<br>/<br>A | N/A        | N/A        | N/A             | N/A             | N/A     | N/A     |     |
| 3 | 12<br>41<br>01<br>42    | 12<br>41<br>01<br>42    | 3 | 12<br>41<br>01<br>42    | 12<br>41<br>05<br>37    | D<br>E<br>L | 3<br>3<br>9<br>2           | B<br>R<br>C<br>C<br>1 | 1 | 1 | MM<br>EJ | P<br>P<br>A<br>R<br>G | N/A<br>EN<br>ST<br>000<br>003<br>970<br>10<br>EN<br>ST | 1           | 3           | intr<br>on | PPARG      | ENST00000397010 | 1               | intron3 | N/A     |     |
| 1 | 57<br>78<br>07<br>8     | 57<br>78<br>07<br>8     | 1 | 57<br>78<br>07<br>8     | 57<br>78<br>18<br>3     | D<br>E<br>L | 1<br>0<br>4<br>6           | B<br>R<br>C<br>C<br>1 | 1 | 1 | NH<br>EJ | T<br>R<br>I<br>M<br>5 | N/A<br>EN<br>ST<br>000<br>003<br>800<br>27             | -           | 1           | 0          | intr<br>on | TRIM5           | ENST00000380027 | -1      | intron0 | N/A |
| 4 | 1<br>83<br>E<br>+0<br>8 | 1<br>83<br>E<br>+0<br>8 | 4 | 1<br>83<br>E<br>+0<br>8 | 1<br>83<br>E<br>+0<br>8 | D<br>E<br>L | 5<br>4<br>1<br>5           | B<br>R<br>C<br>C<br>1 | 1 | 1 | NH<br>EJ | N/<br>A               | N/A                                                    | N<br>/<br>A | N<br>/<br>A | N/A        | N/A        | N/A             | N/A             | N/A     | N/A     |     |
| 3 | 1<br>47<br>E<br>+0<br>8 | 1<br>47<br>E<br>+0<br>8 | 3 | 1<br>47<br>E<br>+0<br>8 | 1<br>47<br>E<br>+0<br>8 | D<br>E<br>L | 6<br>4<br>4<br>2           | B<br>R<br>C<br>C<br>1 | 1 | 1 | NH<br>EJ | N/<br>A               | N/A                                                    | N<br>/<br>A | N<br>/<br>A | N/A        | N/A        | N/A             | N/A             | N/A     | N/A     |     |
| 8 | 77<br>77<br>79<br>43    | 77<br>77<br>79<br>43    | 8 | 77<br>77<br>79<br>43    | 77<br>77<br>81<br>20    | D<br>E<br>L | 1<br>7<br>4<br>3           | B<br>R<br>C<br>C<br>1 | 1 | 1 | MM<br>EJ | ZF<br>H<br>X4         | N/A<br>EN<br>ST<br>000<br>000<br>509<br>61<br>EN<br>ST | 1           | 0           | intr<br>on | ZFHx4      | ENST0000050961  | 1               | intron0 | N/A     |     |
| 0 | 1<br>67<br>72<br>23     | 1<br>67<br>72<br>23     | 0 | 1<br>67<br>72<br>23     | 1<br>69<br>51<br>23     | D<br>E<br>L | 1<br>7<br>4<br>1           | B<br>R<br>C<br>C<br>1 | 1 | 1 | MM<br>EJ | M<br>Y<br>S<br>T<br>4 | N/A<br>EN<br>ST<br>000<br>003<br>727<br>25             | 1           | 1           | intr<br>on | MYST4      | ENST00000372725 | 1               | intron1 | N/A     |     |
| 9 | 31<br>37                | 31<br>37                | 9 | 31<br>37                | 31<br>49                | D<br>E<br>L | 2<br>0                     | B<br>R<br>C<br>C<br>1 | 1 | 1 | MM<br>EJ | N/<br>A               | N/A                                                    | N<br>/<br>A | N<br>/<br>A | N/A        | N/A        | N/A             | N/A             | N/A     | N/A     |     |



















|   |   |                                                  |                                                  |   |                           |                           |             |             |                  |    |    |          |                       |                                     |             |                  |          |                  |                 |         |                                                                                                                                                                                                                                                                                                                                                                                                                       |     |
|---|---|--------------------------------------------------|--------------------------------------------------|---|---------------------------|---------------------------|-------------|-------------|------------------|----|----|----------|-----------------------|-------------------------------------|-------------|------------------|----------|------------------|-----------------|---------|-----------------------------------------------------------------------------------------------------------------------------------------------------------------------------------------------------------------------------------------------------------------------------------------------------------------------------------------------------------------------------------------------------------------------|-----|
| 1 | 5 | 65<br>28<br>24<br>80                             | 65<br>28<br>24<br>80                             | 1 | 25<br>20<br>3             | 25<br>28<br>20<br>3       | C<br>T<br>X | N<br>/<br>A | B<br>R<br>C<br>4 | 1  | 1  | NH<br>EJ |                       | EN<br>ST<br>000<br>002<br>618<br>80 | -<br>1      | intr<br>on<br>9  | PAFAH1B1 | ENST00000006951  | 1               | intron8 | N/A                                                                                                                                                                                                                                                                                                                                                                                                                   |     |
| 1 | 5 | 65<br>83<br>47<br>84                             | 65<br>83<br>47<br>84                             | 2 | 39<br>68<br>11<br>16      | 39<br>68<br>11<br>16      | C<br>T<br>X | N<br>/<br>A | B<br>R<br>C<br>4 | 1  | 1  | NH<br>EJ | M<br>A<br>P2<br>K5    | EN<br>ST<br>000<br>003<br>544<br>98 | 1           | intr<br>on<br>18 | WRB      | ENST000000333781 | 1               | intron1 | N/A                                                                                                                                                                                                                                                                                                                                                                                                                   |     |
| X |   | 89<br>96<br>52<br>03<br>1.<br>47<br>E<br>+0<br>8 | 89<br>96<br>52<br>03<br>1.<br>47<br>E<br>+0<br>8 | 1 | 20<br>80<br>3             | 20<br>06<br>80<br>3       | C<br>T<br>X | N<br>/<br>A | B<br>R<br>C<br>4 | 1  | -1 | NH<br>EJ | N/<br>A               | N/A                                 | N<br>/<br>A | N<br>/<br>A      | N/A      | N/A              | N/A             | N/A     | N/A                                                                                                                                                                                                                                                                                                                                                                                                                   | N/A |
| 6 |   | 47<br>E<br>+0<br>8                               | 47<br>E<br>+0<br>8                               | 1 | 13<br>70<br>93<br>27      | 13<br>70<br>94<br>58      | C<br>T<br>X | N<br>/<br>A | B<br>R<br>C<br>4 | -1 | 1  | NA<br>HR | N/<br>A               | N/A                                 | N<br>/<br>A | N<br>/<br>A      | N/A      | N/A              | N/A             | N/A     | N/A                                                                                                                                                                                                                                                                                                                                                                                                                   |     |
| 2 |   | 2.<br>42<br>E<br>+0<br>8                         | 2.<br>42<br>E<br>+0<br>8                         | 2 | 20<br>58<br>02<br>55      | 20<br>58<br>02<br>55      | C<br>T<br>X | N<br>/<br>A | B<br>R<br>C<br>4 | 1  | 1  | NH<br>EJ | S<br>N<br>D1          | EN<br>ST<br>000<br>003<br>103<br>97 | 1           | intr<br>on<br>27 | N/A      | N/A              | N/A             | N/A     | N/A                                                                                                                                                                                                                                                                                                                                                                                                                   |     |
| 6 |   | 63<br>75<br>90<br>55                             | 63<br>75<br>90<br>55                             | 1 | 25<br>93<br>45<br>33      | 25<br>93<br>45<br>33      | C<br>T<br>X | N<br>/<br>A | B<br>R<br>C<br>4 | 1  | 1  | NH<br>EJ | N/<br>A               | N/A                                 | N<br>/<br>A | N<br>/<br>A      | N/A      | LRRC37B2         | ENST00000398849 | 1       | intron0                                                                                                                                                                                                                                                                                                                                                                                                               | N/A |
| 1 | 5 | 95<br>06<br>79<br>72<br>1.<br>07<br>E<br>+0<br>8 | 95<br>06<br>79<br>72<br>1.<br>07<br>E<br>+0<br>8 | 2 | 19<br>31<br>18<br>22      | 19<br>31<br>18<br>22      | C<br>T<br>X | N<br>/<br>A | B<br>R<br>C<br>4 | 1  | 1  | NH<br>EJ | N/<br>A               | N/A                                 | N<br>/<br>A | N<br>/<br>A      | N/A      | N/A              | N/A             | N/A     | N/A                                                                                                                                                                                                                                                                                                                                                                                                                   |     |
| 6 |   | 07<br>E<br>+0<br>8                               | 07<br>E<br>+0<br>8                               | 1 | 42<br>18<br>94<br>55      | 42<br>18<br>94<br>55      | C<br>T<br>X | N<br>/<br>A | B<br>R<br>C<br>4 | 1  | -1 | NH<br>EJ | N/<br>A               | N/A                                 | N<br>/<br>A | N<br>/<br>A      | N/A      | N/A              | N/A             | N/A     | N/A                                                                                                                                                                                                                                                                                                                                                                                                                   |     |
| 5 |   | 11<br>E<br>+0<br>8                               | 11<br>E<br>+0<br>8                               | 1 | 55<br>18<br>82<br>66      | 55<br>18<br>82<br>66      | C<br>T<br>X | N<br>/<br>A | B<br>R<br>C<br>4 | 1  | -1 | NH<br>EJ | N/<br>A               | N/A                                 | N<br>/<br>A | N<br>/<br>A      | N/A      | VRK3             | ENST00000316763 | -1      | intron7                                                                                                                                                                                                                                                                                                                                                                                                               | N/A |
| 1 | 6 | 54<br>89<br>96<br>88                             | 54<br>89<br>96<br>88                             | 2 | 17<br>04<br>01<br>66      | 17<br>04<br>01<br>66      | C<br>T<br>X | N<br>/<br>A | B<br>R<br>C<br>4 | 1  | 1  | NH<br>EJ | G<br>N<br>A<br>O<br>1 | EN<br>ST<br>000<br>002<br>624<br>94 | 1           | intr<br>on<br>3  | N/A      | N/A              | N/A             | N/A     | N/A                                                                                                                                                                                                                                                                                                                                                                                                                   |     |
| 6 |   | 39<br>57<br>91<br>55<br>1.<br>46<br>E<br>+0<br>8 | 39<br>57<br>91<br>55<br>1.<br>46<br>E<br>+0<br>8 | 1 | 54<br>67<br>91<br>22<br>0 | 54<br>67<br>91<br>22<br>0 | C<br>T<br>X | N<br>/<br>A | B<br>R<br>C<br>4 | 1  | 1  | NH<br>EJ | KI<br>F6              | EN<br>ST<br>000<br>003<br>732<br>13 | -<br>1      | intr<br>on<br>12 | NET1     | ENST000003355029 | 1               | intron3 | N/A                                                                                                                                                                                                                                                                                                                                                                                                                   |     |
| X |   | 46<br>E<br>+0<br>8                               | 46<br>E<br>+0<br>8                               | 1 | 77<br>16<br>26<br>13      | 77<br>16<br>26<br>13      | C<br>T<br>X | N<br>/<br>A | B<br>R<br>C<br>4 | 1  | -1 | NH<br>EJ | N/<br>A               | N/A                                 | N<br>/<br>A | N<br>/<br>A      | N/A      | N/A              | N/A             | N/A     | N/A                                                                                                                                                                                                                                                                                                                                                                                                                   |     |
| 1 | 7 | 11<br>62<br>14<br>85                             | 11<br>62<br>14<br>85                             | 1 | 12<br>51<br>87<br>48      | 12<br>51<br>87<br>48      | D<br>E<br>L | N<br>/<br>A | B<br>R<br>C<br>4 | 1  | 1  | MM<br>EJ | D<br>N<br>A<br>H9     | EN<br>ST<br>000<br>002<br>624<br>42 | 1           | intr<br>on<br>38 | MYOCD    | ENST00000343344  | 1               | intron1 | MAP2K4 DNAH9 ZNF18<br>RPL29P26 HYAL3 DALRD3 STAB1 TEX264 UBA7 GLT8D1 SFMBT1<br>RAD54L2 VIPR1 MAP4 HIGD1D ITIH3 GNL3 USP4 RPL17P16<br>PTPN23 ITIH1 VPRBP CAMP LYZL4 ZNF662 PPM1M TKT MST1R<br>PFKFB4 C3orf18 ZBTB47 SLC38A3 QARS ZNF502 DOCK3 PCBP4<br>CACNA1D NISCH ABHD14A GNAT1 FBXW12 NME6 KBTBD5<br>SS18L2 CYP8B1 KIAA1143 ZNF501 CELSR3 LARS2 CCK C3orf23<br>MON1A TMEM115 SETD2 CCDC36 ZNF35 AMIGO3 LIMD1 IFRD2 |     |
| 3 |   | 41<br>41<br>69<br>36                             | 41<br>41<br>69<br>36                             | 3 | 53<br>84<br>84<br>99      | 53<br>84<br>84<br>99      | D<br>E<br>L | N<br>/<br>A | B<br>R<br>C<br>4 | 1  | 1  | MM<br>EJ | UL<br>K4              | EN<br>ST<br>000<br>003<br>018<br>31 | -<br>1      | intr<br>on<br>33 | CHDH     | ENST00000315251  | -1              | intron0 | N/A                                                                                                                                                                                                                                                                                                                                                                                                                   |     |







4  
5

53

| Gene     | Accession | Start    | End      | Strand     | Orientation | Feature  | Gene     | Accession | Start | End | Strand | Orientation | Feature | Gene | Accession | Start | End | Strand | Orientation | Feature |
|----------|-----------|----------|----------|------------|-------------|----------|----------|-----------|-------|-----|--------|-------------|---------|------|-----------|-------|-----|--------|-------------|---------|
| PCNXL3   | LRFN4     | TMEM216  | TM7SF2   | BSCL2      | STX3        | GLYATL1  |          |           |       |     |        |             |         |      |           |       |     |        |             |         |
| POLR2G   | MS4A7     | OR5B17   | PTPRCAP  | FIBP       | TUT1        | FAM111A  | ACTN3    |           |       |     |        |             |         |      |           |       |     |        |             |         |
| OR9Q2    | SSRP1     | RCOR2    | SLC43A3  | TMEM151A   | OR5A2       | SLC22A8  |          |           |       |     |        |             |         |      |           |       |     |        |             |         |
| C11orf24 | RAB1B     | SSSCA1   | RHOD     | ROM1       | ADRBK1      | SMTNL1   | DDB1     |           |       |     |        |             |         |      |           |       |     |        |             |         |
| FAU      | SLC22A11  | RBM4B    | MTA2     | GAL3ST3    | SLC29A2     | CATSPER1 |          |           |       |     |        |             |         |      |           |       |     |        |             |         |
| OTUB1    | TBX10     | MRPL21   | EHBP1L1  | DAK        | MEN1        | OR5AK3P  | GANAB    |           |       |     |        |             |         |      |           |       |     |        |             |         |
| MAP4K2   | GPR137    | MS4A13   | C11orf48 | CCDC88B    | MS4A1       | OR5AK2   |          |           |       |     |        |             |         |      |           |       |     |        |             |         |
| ARL2     | CCS       | CD248    | EHD1     | BATF2      | LRRN4       | CL       | DPP3     | VPS37C    | VWCE  |     |        |             |         |      |           |       |     |        |             |         |
| OR9I1    | MS4A10    | YPEL4    | DAGLA    | DRAP1      | SAPS3       | C11orf85 | CDC42BP6 |           |       |     |        |             |         |      |           |       |     |        |             |         |
| FADS1    | CTNND1    | SCGB1D1  | FBXL11   | LRRC55     | OR5B2       | PELI3    |          |           |       |     |        |             |         |      |           |       |     |        |             |         |
| RTN4RL2  | BEST1     | CABP4    | RNASEH2C | ZFP91      | SCGB1A1     | OR5B12   |          |           |       |     |        |             |         |      |           |       |     |        |             |         |
| FRMD8    | TCN1      | MPEG1    | MS4A5    | CNIH2      | OR4D9       | CYBASC3  | C11orf2  |           |       |     |        |             |         |      |           |       |     |        |             |         |
| CCDC86   | TMX2      | MS4A12   | SLC22A12 | PPP1R14B   | UNC93B1     | SCYL1    |          |           |       |     |        |             |         |      |           |       |     |        |             |         |
| MACROD1  | TRPT1     | TMEM179B | GNG3     | SCGB1D4    | SSH3        | PLA2G16  |          |           |       |     |        |             |         |      |           |       |     |        |             |         |
| NPAS4    | LRP5      | KLC2     | TMM10    | MS4A4A     | C11orf66    | PPP2R5B  | ATG2A    |           |       |     |        |             |         |      |           |       |     |        |             |         |
| CDC42EP2 | FTHL16    | MRPL16   | OVOL1    | SLC25A45   | SYVN1       | BAD      |          |           |       |     |        |             |         |      |           |       |     |        |             |         |
| MS4A2    | PGA3      | PACS1    | BRMS1    | SNX15      | TIGD3       | SNX32    | OR4D11   |           |       |     |        |             |         |      |           |       |     |        |             |         |
| MS4A8B   | NUDT8     | WDR74    | TMEM223  | FAM89B     | ZFPL1       | LGALS12  |          |           |       |     |        |             |         |      |           |       |     |        |             |         |
| C11orf31 | ZBTB3     | NUDT22   | GPR152   | OR1S1      | NDUUF1      | EIF1AD   | SIPA1    |           |       |     |        |             |         |      |           |       |     |        |             |         |
| PRPF19   | CCDC85B   | NDUFS8   | PGA4     | uc001nrq.1 | RBM4        | P2RX3    | TTC9C    |           |       |     |        |             |         |      |           |       |     |        |             |         |
| C11orf84 | CPT1A     | SLC22A24 | RARRES3  | MED19      | HRA5L5      | CFL1     |          |           |       |     |        |             |         |      |           |       |     |        |             |         |
| OR10V1   | SYT12     | C11orf79 | RPS6KA4  | KCNK7      | PRG2        | SERPING1 | RTN3     |           |       |     |        |             |         |      |           |       |     |        |             |         |
| ALDH3B1  | MS4A15    | PRDX5    | TBC1D10C | FADS3      | ASRGL1      | DNAJC4   |          |           |       |     |        |             |         |      |           |       |     |        |             |         |
| MARK2    | OR5A21P   | PYGM     | OR10C1   | OR5A1      | GPR44       | NAALADL1 |          |           |       |     |        |             |         |      |           |       |     |        |             |         |
| SLC43A1  | HRA5L2    | STX5     | OR10W1   | OR4D6      | SF3B2       | SLC22A6  |          |           |       |     |        |             |         |      |           |       |     |        |             |         |
| COX8A    | KAT5      | TNKS1BP1 | FAM111B  | NXF1       | MTL5        | ZDHHC5   |          |           |       |     |        |             |         |      |           |       |     |        |             |         |
| ANKRD13D | CD6       | C11orf72 | CTSW     | CST6       | RAD9A       | FEN1     | CDK2AP2  |           |       |     |        |             |         |      |           |       |     |        |             |         |
| MRPL11   | ZNHIT2    | C11orf80 | PLAC1L   | EFEMP2     | GIF         | SCGB2A2  |          |           |       |     |        |             |         |      |           |       |     |        |             |         |
| SLC22A25 | ESRRA     | RAB31L1  | CAPN1    | MUS81      | CLP1        | PLCB3    | OR1S2    |           |       |     |        |             |         |      |           |       |     |        |             |         |
| RASGRP2  | OR9Q1     | TMEM132A | RPS6KB2  | STIP1      | CHKA        | EML3     |          |           |       |     |        |             |         |      |           |       |     |        |             |         |
| SCGB2A1  | AIP       | TMEM109  | SART1    | MAP3K11    | FERMT3      | CLCF1    |          |           |       |     |        |             |         |      |           |       |     |        |             |         |
| SLC3A2   | SLC22A10  | GAL      | MRPL49   | SCGB1D2    | BBS1        | ATL3     | TMEM138  |           |       |     |        |             |         |      |           |       |     |        |             |         |
| CHRM1    | CTSF      | PC       | SLC22A9  | APLN       | R           | GPHA2    | OR5B21   | RCE1      | OR5A1 |     |        |             |         |      |           |       |     |        |             |         |
| TCIRG1   | LTPB3     | OR6Q1    | POLA2    | CABP2      | RELA        | FOSL1    | SPDYC    |           |       |     |        |             |         |      |           |       |     |        |             |         |
| ALDH3B2  | LPXN      | TMEM134  | C11orf64 | SAC3D1     | B3GAT3      | UBE2L6   |          |           |       |     |        |             |         |      |           |       |     |        |             |         |
| C11orf83 | FKBP2     | SPTBN2   | DPF2     | GLYAT      | TAF6L       | GSTP1    | ZP1      |           |       |     |        |             |         |      |           |       |     |        |             |         |
| SUV420H1 | FADS2     | SLC22A20 | MS4A6E   | MS4A4E     | KCNK4       | POLD4    |          |           |       |     |        |             |         |      |           |       |     |        |             |         |
| OSBP     | CDCA5     | METTL12  | TMEM137  | C11orf9    | SLC15A3     | MS4A14   |          |           |       |     |        |             |         |      |           |       |     |        |             |         |
| UBXN1    | EEF1G     | ZDHHC24  | C11orf10 | C11orf68   | INCEPN      | VEGFB    |          |           |       |     |        |             |         |      |           |       |     |        |             |         |
| AHNAK    | NRXN2     | TSGA10IP | BANF1    | INTS5      | PATL1       | ATPGD1   | FLRT1    |           |       |     |        |             |         |      |           |       |     |        |             |         |
| PRG3     | SF1       | C11orf20 | MS4A3    | DTX4       | CCDC87      | ACY3     | PITPNM1  |           |       |     |        |             |         |      |           |       |     |        |             |         |
| PPP1CA   | YIF1A     | MS4A6A   | GLYATL2  | HNRNPUL2   | CD5         | OR5B3    |          |           |       |     |        |             |         |      |           |       |     |        |             |         |
| CORO1B   | PGA5      | NAT11    | C11orf86 | RIN1       |             |          |          |           |       |     |        |             |         |      |           |       |     |        |             |         |





























|  |  | 1. |  | 1. |  | 1. |  | 1. |  | 4 |  | 34 |  |  |  |  |  |  |  |  |  |
|--|--|----|--|----|--|----|--|----|--|---|--|----|--|--|--|--|--|--|--|--|--|
|  |  | 09 |  | 09 |  | 38 |  | 38 |  | 3 |  | 3  |  |  |  |  |  |  |  |  |  |
|  |  | E  |  | E  |  | E  |  | E  |  | D |  | B  |  |  |  |  |  |  |  |  |  |
|  |  | +0 |  | +0 |  | +0 |  | +0 |  | E |  | R  |  |  |  |  |  |  |  |  |  |
|  |  | 8  |  | 8  |  | 8  |  | 8  |  | L |  | C  |  |  |  |  |  |  |  |  |  |
|  |  |    |  |    |  |    |  |    |  |   |  | 2  |  |  |  |  |  |  |  |  |  |
|  |  |    |  |    |  |    |  |    |  |   |  | 1  |  |  |  |  |  |  |  |  |  |
|  |  |    |  |    |  |    |  |    |  |   |  | 1  |  |  |  |  |  |  |  |  |  |
|  |  |    |  |    |  |    |  |    |  |   |  | 1  |  |  |  |  |  |  |  |  |  |
|  |  |    |  |    |  |    |  |    |  |   |  | 1  |  |  |  |  |  |  |  |  |  |
|  |  |    |  |    |  |    |  |    |  |   |  | 1  |  |  |  |  |  |  |  |  |  |
|  |  |    |  |    |  |    |  |    |  |   |  | 1  |  |  |  |  |  |  |  |  |  |
|  |  |    |  |    |  |    |  |    |  |   |  | 1  |  |  |  |  |  |  |  |  |  |
|  |  |    |  |    |  |    |  |    |  |   |  | 1  |  |  |  |  |  |  |  |  |  |
|  |  |    |  |    |  |    |  |    |  |   |  | 1  |  |  |  |  |  |  |  |  |  |
|  |  |    |  |    |  |    |  |    |  |   |  | 1  |  |  |  |  |  |  |  |  |  |
|  |  |    |  |    |  |    |  |    |  |   |  | 1  |  |  |  |  |  |  |  |  |  |
|  |  |    |  |    |  |    |  |    |  |   |  | 1  |  |  |  |  |  |  |  |  |  |
|  |  |    |  |    |  |    |  |    |  |   |  | 1  |  |  |  |  |  |  |  |  |  |
|  |  |    |  |    |  |    |  |    |  |   |  | 1  |  |  |  |  |  |  |  |  |  |
|  |  |    |  |    |  |    |  |    |  |   |  | 1  |  |  |  |  |  |  |  |  |  |
|  |  |    |  |    |  |    |  |    |  |   |  | 1  |  |  |  |  |  |  |  |  |  |
|  |  |    |  |    |  |    |  |    |  |   |  | 1  |  |  |  |  |  |  |  |  |  |
|  |  |    |  |    |  |    |  |    |  |   |  | 1  |  |  |  |  |  |  |  |  |  |
|  |  |    |  |    |  |    |  |    |  |   |  | 1  |  |  |  |  |  |  |  |  |  |
|  |  |    |  |    |  |    |  |    |  |   |  | 1  |  |  |  |  |  |  |  |  |  |
|  |  |    |  |    |  |    |  |    |  |   |  | 1  |  |  |  |  |  |  |  |  |  |
|  |  |    |  |    |  |    |  |    |  |   |  | 1  |  |  |  |  |  |  |  |  |  |
|  |  |    |  |    |  |    |  |    |  |   |  | 1  |  |  |  |  |  |  |  |  |  |
|  |  |    |  |    |  |    |  |    |  |   |  | 1  |  |  |  |  |  |  |  |  |  |
|  |  |    |  |    |  |    |  |    |  |   |  | 1  |  |  |  |  |  |  |  |  |  |
|  |  |    |  |    |  |    |  |    |  |   |  | 1  |  |  |  |  |  |  |  |  |  |
|  |  |    |  |    |  |    |  |    |  |   |  | 1  |  |  |  |  |  |  |  |  |  |
|  |  |    |  |    |  |    |  |    |  |   |  | 1  |  |  |  |  |  |  |  |  |  |
|  |  |    |  |    |  |    |  |    |  |   |  | 1  |  |  |  |  |  |  |  |  |  |
|  |  |    |  |    |  |    |  |    |  |   |  | 1  |  |  |  |  |  |  |  |  |  |
|  |  |    |  |    |  |    |  |    |  |   |  | 1  |  |  |  |  |  |  |  |  |  |
|  |  |    |  |    |  |    |  |    |  |   |  | 1  |  |  |  |  |  |  |  |  |  |
|  |  |    |  |    |  |    |  |    |  |   |  | 1  |  |  |  |  |  |  |  |  |  |
|  |  |    |  |    |  |    |  |    |  |   |  | 1  |  |  |  |  |  |  |  |  |  |
|  |  |    |  |    |  |    |  |    |  |   |  | 1  |  |  |  |  |  |  |  |  |  |
|  |  |    |  |    |  |    |  |    |  |   |  | 1  |  |  |  |  |  |  |  |  |  |
|  |  |    |  |    |  |    |  |    |  |   |  | 1  |  |  |  |  |  |  |  |  |  |
|  |  |    |  |    |  |    |  |    |  |   |  | 1  |  |  |  |  |  |  |  |  |  |
|  |  |    |  |    |  |    |  |    |  |   |  | 1  |  |  |  |  |  |  |  |  |  |
|  |  |    |  |    |  |    |  |    |  |   |  | 1  |  |  |  |  |  |  |  |  |  |
|  |  |    |  |    |  |    |  |    |  |   |  | 1  |  |  |  |  |  |  |  |  |  |
|  |  |    |  |    |  |    |  |    |  |   |  | 1  |  |  |  |  |  |  |  |  |  |
|  |  |    |  |    |  |    |  |    |  |   |  | 1  |  |  |  |  |  |  |  |  |  |
|  |  |    |  |    |  |    |  |    |  |   |  | 1  |  |  |  |  |  |  |  |  |  |
|  |  |    |  |    |  |    |  |    |  |   |  | 1  |  |  |  |  |  |  |  |  |  |
|  |  |    |  |    |  |    |  |    |  |   |  | 1  |  |  |  |  |  |  |  |  |  |
|  |  |    |  |    |  |    |  |    |  |   |  | 1  |  |  |  |  |  |  |  |  |  |
|  |  |    |  |    |  |    |  |    |  |   |  | 1  |  |  |  |  |  |  |  |  |  |
|  |  |    |  |    |  |    |  |    |  |   |  | 1  |  |  |  |  |  |  |  |  |  |
|  |  |    |  |    |  |    |  |    |  |   |  | 1  |  |  |  |  |  |  |  |  |  |
|  |  |    |  |    |  |    |  |    |  |   |  | 1  |  |  |  |  |  |  |  |  |  |
|  |  |    |  |    |  |    |  |    |  |   |  | 1  |  |  |  |  |  |  |  |  |  |
|  |  |    |  |    |  |    |  |    |  |   |  | 1  |  |  |  |  |  |  |  |  |  |
|  |  |    |  |    |  |    |  |    |  |   |  | 1  |  |  |  |  |  |  |  |  |  |
|  |  |    |  |    |  |    |  |    |  |   |  | 1  |  |  |  |  |  |  |  |  |  |
|  |  |    |  |    |  |    |  |    |  |   |  | 1  |  |  |  |  |  |  |  |  |  |
|  |  |    |  |    |  |    |  |    |  |   |  | 1  |  |  |  |  |  |  |  |  |  |
|  |  |    |  |    |  |    |  |    |  |   |  | 1  |  |  |  |  |  |  |  |  |  |
|  |  |    |  |    |  |    |  |    |  |   |  | 1  |  |  |  |  |  |  |  |  |  |
|  |  |    |  |    |  |    |  |    |  |   |  | 1  |  |  |  |  |  |  |  |  |  |
|  |  |    |  |    |  |    |  |    |  |   |  | 1  |  |  |  |  |  |  |  |  |  |
|  |  |    |  |    |  |    |  |    |  |   |  | 1  |  |  |  |  |  |  |  |  |  |
|  |  |    |  |    |  |    |  |    |  |   |  | 1  |  |  |  |  |  |  |  |  |  |
|  |  |    |  |    |  |    |  |    |  |   |  | 1  |  |  |  |  |  |  |  |  |  |
|  |  |    |  |    |  |    |  |    |  |   |  | 1  |  |  |  |  |  |  |  |  |  |
|  |  |    |  |    |  |    |  |    |  |   |  | 1  |  |  |  |  |  |  |  |  |  |
|  |  |    |  |    |  |    |  |    |  |   |  | 1  |  |  |  |  |  |  |  |  |  |
|  |  |    |  |    |  |    |  |    |  |   |  | 1  |  |  |  |  |  |  |  |  |  |
|  |  |    |  |    |  |    |  |    |  |   |  | 1  |  |  |  |  |  |  |  |  |  |
|  |  |    |  |    |  |    |  |    |  |   |  | 1  |  |  |  |  |  |  |  |  |  |
|  |  |    |  |    |  |    |  |    |  |   |  | 1  |  |  |  |  |  |  |  |  |  |
|  |  |    |  |    |  |    |  |    |  |   |  | 1  |  |  |  |  |  |  |  |  |  |
|  |  |    |  |    |  |    |  |    |  |   |  | 1  |  |  |  |  |  |  |  |  |  |
|  |  |    |  |    |  |    |  |    |  |   |  | 1  |  |  |  |  |  |  |  |  |  |
|  |  |    |  |    |  |    |  |    |  |   |  | 1  |  |  |  |  |  |  |  |  |  |
|  |  |    |  |    |  |    |  |    |  |   |  | 1  |  |  |  |  |  |  |  |  |  |
|  |  |    |  |    |  |    |  |    |  |   |  | 1  |  |  |  |  |  |  |  |  |  |
|  |  |    |  |    |  |    |  |    |  |   |  | 1  |  |  |  |  |  |  |  |  |  |
|  |  |    |  |    |  |    |  |    |  |   |  | 1  |  |  |  |  |  |  |  |  |  |
|  |  |    |  |    |  |    |  |    |  |   |  | 1  |  |  |  |  |  |  |  |  |  |
|  |  |    |  |    |  |    |  |    |  |   |  | 1  |  |  |  |  |  |  |  |  |  |
|  |  |    |  |    |  |    |  |    |  |   |  | 1  |  |  |  |  |  |  |  |  |  |
|  |  |    |  |    |  |    |  |    |  |   |  | 1  |  |  |  |  |  |  |  |  |  |
|  |  |    |  |    |  |    |  |    |  |   |  | 1  |  |  |  |  |  |  |  |  |  |
|  |  |    |  |    |  |    |  |    |  |   |  | 1  |  |  |  |  |  |  |  |  |  |
|  |  |    |  |    |  |    |  |    |  |   |  | 1  |  |  |  |  |  |  |  |  |  |
|  |  |    |  |    |  |    |  |    |  |   |  | 1  |  |  |  |  |  |  |  |  |  |
|  |  |    |  |    |  |    |  |    |  |   |  | 1  |  |  |  |  |  |  |  |  |  |
|  |  |    |  |    |  |    |  |    |  |   |  | 1  |  |  |  |  |  |  |  |  |  |
|  |  |    |  |    |  |    |  |    |  |   |  | 1  |  |  |  |  |  |  |  |  |  |
|  |  |    |  |    |  |    |  |    |  |   |  | 1  |  |  |  |  |  |  |  |  |  |
|  |  |    |  |    |  |    |  |    |  |   |  | 1  |  |  |  |  |  |  |  |  |  |
|  |  |    |  |    |  |    |  |    |  |   |  | 1  |  |  |  |  |  |  |  |  |  |
|  |  |    |  |    |  |    |  |    |  |   |  | 1  |  |  |  |  |  |  |  |  |  |
|  |  |    |  |    |  |    |  |    |  |   |  | 1  |  |  |  |  |  |  |  |  |  |
|  |  |    |  |    |  |    |  |    |  |   |  | 1  |  |  |  |  |  |  |  |  |  |
|  |  |    |  |    |  |    |  |    |  |   |  | 1  |  |  |  |  |  |  |  |  |  |
|  |  |    |  |    |  |    |  |    |  |   |  | 1  |  |  |  |  |  |  |  |  |  |
|  |  |    |  |    |  |    |  |    |  |   |  | 1  |  |  |  |  |  |  |  |  |  |
|  |  |    |  |    |  |    |  |    |  |   |  | 1  |  |  |  |  |  |  |  |  |  |
|  |  |    |  |    |  |    |  |    |  |   |  | 1  |  |  |  |  |  |  |  |  |  |
|  |  |    |  |    |  |    |  |    |  |   |  | 1  |  |  |  |  |  |  |  |  |  |
|  |  |    |  |    |  |    |  |    |  |   |  | 1  |  |  |  |  |  |  |  |  |  |
|  |  |    |  |    |  |    |  |    |  |   |  | 1  |  |  |  |  |  |  |  |  |  |
|  |  |    |  |    |  |    |  |    |  |   |  | 1  |  |  |  |  |  |  |  |  |  |
|  |  |    |  |    |  |    |  |    |  |   |  | 1  |  |  |  |  |  |  |  |  |  |
|  |  |    |  |    |  |    |  |    |  |   |  | 1  |  |  |  |  |  |  |  |  |  |
|  |  |    |  |    |  |    |  |    |  |   |  | 1  |  |  |  |  |  |  |  |  |  |
|  |  |    |  |    |  |    |  |    |  |   |  | 1  |  |  |  |  |  |  |  |  |  |
|  |  |    |  |    |  |    |  |    |  |   |  | 1  |  |  |  |  |  |  |  |  |  |
|  |  |    |  |    |  |    |  |    |  |   |  | 1  |  |  |  |  |  |  |  |  |  |
|  |  |    |  |    |  |    |  |    |  |   |  | 1  |  |  |  |  |  |  |  |  |  |
|  |  |    |  |    |  |    |  |    |  |   |  | 1  |  |  |  |  |  |  |  |  |  |
|  |  |    |  |    |  |    |  |    |  |   |  | 1  |  |  |  |  |  |  |  |  |  |
|  |  |    |  |    |  |    |  |    |  |   |  | 1  |  |  |  |  |  |  |  |  |  |
|  |  |    |  |    |  |    |  |    |  |   |  | 1  |  |  |  |  |  |  |  |  |  |
|  |  |    |  |    |  |    |  |    |  |   |  | 1  |  |  |  |  |  |  |  |  |  |
|  |  |    |  |    |  |    |  |    |  |   |  | 1  |  |  |  |  |  |  |  |  |  |
|  |  |    |  |    |  |    |  |    |  |   |  | 1  |  |  |  |  |  |  |  |  |  |
|  |  |    |  |    |  |    |  |    |  |   |  | 1  |  |  |  |  |  |  |  |  |  |



| Gene      | ChrA | Breakpoint_A | ChrB | Breakpoint_B | Event | Size    | Patient |
|-----------|------|--------------|------|--------------|-------|---------|---------|
| AIM1      | 6    | 105624358    | 6    | 109314541    | DEL   | 3689183 | BRC11   |
| AIM1      | 6    | 107072226    | 6    | 107074553    | DEL   | 2326    | BRC16   |
| ANK1      | 8    | 41857756     | 8    | 41909046     | DEL   | 51287   | BRC6    |
| ANK1      | 8    | 41869287     | 20   | 59090675     | CTX   | N/A     | BRC36   |
| ANK1      | 8    | 40457726     | 8    | 43462159     | DEL   | 3003427 | BRC49   |
| ANKFN1    | 17   | 51735699     | 17   | 51735887     | DEL   | 186     | BRC41   |
| ANKFN1    | 17   | 51453440     | 17   | 54596095     | DEL   | 3141649 | BRC35   |
| ARRB1     | 11   | 74649654     | 11   | 74670244     | DEL   | 20591   | BRC35   |
| ARRB1     | 11   | 70500352     | 11   | 75317690     | DEL   | 4816338 | BRC22   |
| BCAS1     | 20   | 48611427     | 20   | 52279539     | DEL   | 3667110 | BRC44   |
| BCAS1     | 20   | 51401101     | 20   | 54975414     | DEL   | 3573311 | BRC17   |
| BCAS4     | 20   | 48611427     | 20   | 52279539     | DEL   | 3667110 | BRC44   |
| BCAS4     | 20   | 48892971     | 21   | 29949264     | CTX   | N/A     | BRC12   |
| C11orf24  | 11   | 67595847     | 11   | 68472617     | DEL   | 875767  | BRC5    |
| C11orf24  | 11   | 67785502     | 13   | 22073570     | CTX   | N/A     | BRC22   |
| C11orf24  | 11   | 67625117     | 11   | 69724046     | DEL   | 2097932 | BRC22   |
| C11orf59  | 11   | 70950698     | 11   | 74508544     | DEL   | 3556845 | BRC13   |
| C11orf59  | 11   | 70500352     | 11   | 75317690     | DEL   | 4816338 | BRC22   |
| C19orf45  | 19   | 6633971      | 19   | 7988053      | DEL   | 1353078 | BRC44   |
| C19orf45  | 9    | 134958218    | 19   | 7475834      | CTX   | N/A     | BRC52   |
| C20orf133 | 20   | 14773699     | 20   | 14794308     | DEL   | 20608   | BRC36   |
| C20orf133 | 20   | 12821024     | 20   | 14070158     | DEL   | 1248134 | BRC5    |
| CA10      | 17   | 46093811     | 17   | 47526550     | DEL   | 1431739 | BRC44   |
| CA10      | 17   | 47318360     | 17   | 50681691     | DEL   | 3362328 | BRC35   |
| CHKA      | 11   | 67595847     | 11   | 68472617     | DEL   | 875767  | BRC5    |
| CHKA      | 11   | 67625117     | 11   | 69724046     | DEL   | 2097932 | BRC22   |
| CLDN14    | 21   | 35457106     | 21   | 36815535     | DEL   | 1357429 | BRC44   |
| CLDN14    | 20   | 41129662     | 21   | 36868378     | CTX   | N/A     | BRC12   |
| CPT1A     | 11   | 67922562     | 11   | 68579241     | DEL   | 655678  | BRC42   |

|         |    |           |    |           |     |         |       |
|---------|----|-----------|----|-----------|-----|---------|-------|
| CPT1A   | 11 | 67595847  | 11 | 68472617  | DEL | 875767  | BRC5  |
| CPT1A   | 11 | 67625117  | 11 | 69724046  | DEL | 2097932 | BRC22 |
| CSRP3   | 11 | 18652360  | 11 | 19574158  | DEL | 920798  | BRC44 |
| CSRP3   | 11 | 17893275  | 11 | 22775779  | DEL | 4881502 | BRC20 |
| CYP24A1 | 20 | 48611427  | 20 | 52279539  | DEL | 3667110 | BRC44 |
| CYP24A1 | 20 | 51401101  | 20 | 54975414  | DEL | 3573311 | BRC17 |
| DLG2    | 11 | 80621951  | 11 | 85277898  | DEL | 4654943 | BRC12 |
| DLG2    | 11 | 83950381  | 11 | 83951700  | DEL | 1315    | BRC16 |
| DMXL2   | 15 | 49607827  | 17 | 54247128  | CTX | N/A     | BRC6  |
| DMXL2   | 15 | 49627289  | 20 | 16121757  | CTX | N/A     | BRC44 |
| DNM3    | 1  | 170126033 | 4  | 177525371 | CTX | N/A     | BRC44 |
| DNM3    | 1  | 169606621 | 1  | 172238029 | DEL | 2630407 | BRC11 |
| E2F8    | 11 | 18652360  | 11 | 19574158  | DEL | 920798  | BRC44 |
| E2F8    | 11 | 17893275  | 11 | 22775779  | DEL | 4881502 | BRC20 |
| ELAVL1  | 19 | 6633971   | 19 | 7988053   | DEL | 1353078 | BRC44 |
| ELAVL1  | 19 | 7966133   | 19 | 7967824   | DEL | 1689    | BRC16 |
| ELP4    | 10 | 21395714  | 11 | 31752224  | CTX | N/A     | BRC13 |
| ELP4    | 11 | 31729116  | 11 | 31771239  | DEL | 42122   | BRC15 |
| FAM10A5 | 11 | 18194497  | 11 | 18647778  | DEL | 452279  | BRC44 |
| FAM10A5 | 11 | 17893275  | 11 | 22775779  | DEL | 4881502 | BRC20 |
| FGFR1   | 8  | 38435223  | 17 | 15319937  | CTX | N/A     | BRC3  |
| FGFR1   | 8  | 38423599  | 8  | 38507277  | DEL | 83677   | BRC12 |
| GAL     | 11 | 67922562  | 11 | 68579241  | DEL | 655678  | BRC42 |
| GAL     | 11 | 67595847  | 11 | 68472617  | DEL | 875767  | BRC5  |
| GAL     | 11 | 67625117  | 11 | 69724046  | DEL | 2097932 | BRC22 |
| GTF2H1  | 11 | 18194497  | 11 | 18647778  | DEL | 452279  | BRC44 |
| GTF2H1  | 11 | 17893275  | 11 | 22775779  | DEL | 4881502 | BRC20 |
| HGSNAT  | 1  | 218131972 | 8  | 43130454  | CTX | N/A     | BRC24 |
| HGSNAT  | 8  | 40457726  | 8  | 43462159  | DEL | 3003427 | BRC49 |
| HPS5    | 11 | 18194497  | 11 | 18647778  | DEL | 452279  | BRC44 |
| HPS5    | 11 | 17893275  | 11 | 22775779  | DEL | 4881502 | BRC20 |
| IGHMBP2 | 11 | 67922562  | 11 | 68579241  | DEL | 655678  | BRC42 |

|          |    |           |    |           |     |         |       |
|----------|----|-----------|----|-----------|-----|---------|-------|
| IGHMBP2  | 11 | 67595847  | 11 | 68472617  | DEL | 875767  | BRC5  |
| IGHMBP2  | 11 | 67625117  | 11 | 69724046  | DEL | 2097932 | BRC22 |
| IGSF22   | 11 | 18652360  | 11 | 19574158  | DEL | 920798  | BRC44 |
| IGSF22   | 11 | 17893275  | 11 | 22775779  | DEL | 4881502 | BRC20 |
| KCNMA1   | 10 | 78896323  | 10 | 78898380  | DEL | 2057    | BRC16 |
| KCNMA1   | 10 | 78996431  | 13 | 61310786  | CTX | N/A     | BRC10 |
| KIAA1147 | 7  | 141016525 | 7  | 141026965 | DEL | 10434   | BRC41 |
| KIAA1147 | 7  | 141018378 | 7  | 141020618 | DEL | 2238    | BRC16 |
| LDHA     | 11 | 18194497  | 11 | 18647778  | DEL | 452279  | BRC44 |
| LDHA     | 11 | 17893275  | 11 | 22775779  | DEL | 4881502 | BRC20 |
| LDHAL6A  | 11 | 18194497  | 11 | 18647778  | DEL | 452279  | BRC44 |
| LDHAL6A  | 11 | 17893275  | 11 | 22775779  | DEL | 4881502 | BRC20 |
| LDHC     | 11 | 18194497  | 11 | 18647778  | DEL | 452279  | BRC44 |
| LDHC     | 11 | 17893275  | 11 | 22775779  | DEL | 4881502 | BRC20 |
| LRP5     | 11 | 67922562  | 11 | 68579241  | DEL | 655678  | BRC42 |
| LRP5     | 11 | 67595847  | 11 | 68472617  | DEL | 875767  | BRC5  |
| LRP5     | 11 | 67625117  | 11 | 69724046  | DEL | 2097932 | BRC22 |
| MRGPRD   | 11 | 67922562  | 11 | 68579241  | DEL | 655678  | BRC42 |
| MRGPRD   | 11 | 67625117  | 11 | 69724046  | DEL | 2097932 | BRC22 |
| MRGPRF   | 11 | 67922562  | 11 | 68579241  | DEL | 655678  | BRC42 |
| MRGPRF   | 11 | 67625117  | 11 | 69724046  | DEL | 2097932 | BRC22 |
| MRGPRX1  | 11 | 18652360  | 11 | 19574158  | DEL | 920798  | BRC44 |
| MRGPRX1  | 11 | 17893275  | 11 | 22775779  | DEL | 4881502 | BRC20 |
| MRGPRX2  | 11 | 18652360  | 11 | 19574158  | DEL | 920798  | BRC44 |
| MRGPRX2  | 11 | 17893275  | 11 | 22775779  | DEL | 4881502 | BRC20 |
| MRPL21   | 11 | 67922562  | 11 | 68579241  | DEL | 655678  | BRC42 |
| MRPL21   | 11 | 67595847  | 11 | 68472617  | DEL | 875767  | BRC5  |
| MRPL21   | 11 | 67625117  | 11 | 69724046  | DEL | 2097932 | BRC22 |
| MTL5     | 11 | 67922562  | 11 | 68579241  | DEL | 655678  | BRC42 |
| MTL5     | 11 | 67595847  | 11 | 68472617  | DEL | 875767  | BRC5  |
| MTL5     | 11 | 67625117  | 11 | 69724046  | DEL | 2097932 | BRC22 |
| MYST3    | 8  | 41857756  | 8  | 41909046  | DEL | 51287   | BRC6  |

|         |    |          |    |           |     |         |       |
|---------|----|----------|----|-----------|-----|---------|-------|
| MYST3   | 8  | 40457726 | 8  | 43462159  | DEL | 3003427 | BRC49 |
| MYST3   | 8  | 41962161 | 19 | 3960043   | CTX | N/A     | BRC17 |
| MYST4   | 10 | 76376772 | 10 | 76376951  | DEL | 177     | BRC41 |
| MYST4   | 10 | 76393232 | 10 | 76397372  | DEL | 4140    | BRC16 |
| NEGR1   | 1  | 71829487 | 1  | 71831079  | DEL | 1590    | BRC16 |
| NEGR1   | 1  | 71999408 | 3  | 111518038 | CTX | N/A     | BRC37 |
| NRG1    | 8  | 31922445 | 8  | 31923000  | DEL | 549     | BRC41 |
| NRG1    | 8  | 28097654 | 8  | 32351503  | DEL | 4252845 | BRC49 |
| NRG1    | 8  | 31525542 | 8  | 34864469  | DEL | 3337927 | BRC29 |
| PFDN4   | 20 | 48611427 | 20 | 52279539  | DEL | 3667110 | BRC44 |
| PFDN4   | 20 | 51401101 | 20 | 54975414  | DEL | 3573311 | BRC17 |
| PPIAP10 | 20 | 48611427 | 20 | 52279539  | DEL | 3667110 | BRC44 |
| PPIAP10 | 20 | 51401101 | 20 | 54975414  | DEL | 3573311 | BRC17 |
| PPM1E   | 15 | 49607827 | 17 | 54247128  | CTX | N/A     | BRC6  |
| PPM1E   | 17 | 51453440 | 17 | 54596095  | DEL | 3141649 | BRC35 |
| PTPN5   | 11 | 18652360 | 11 | 19574158  | DEL | 920798  | BRC44 |
| PTPN5   | 11 | 17893275 | 11 | 22775779  | DEL | 4881502 | BRC20 |
| RAB6A   | 11 | 73102097 | 20 | 53299710  | CTX | N/A     | BRC5  |
| RAB6A   | 11 | 70500352 | 11 | 75317690  | DEL | 4816338 | BRC22 |
| RPN2    | 17 | 33169841 | 20 | 35278169  | CTX | N/A     | BRC13 |
| RPN2    | 20 | 35278158 | 20 | 35278284  | INV | 118     | BRC13 |
| RPN2    | 13 | 36599790 | 20 | 35287380  | CTX | N/A     | BRC42 |
| SAA1    | 11 | 18194497 | 11 | 18647778  | DEL | 452279  | BRC44 |
| SAA1    | 11 | 17893275 | 11 | 22775779  | DEL | 4881502 | BRC20 |
| SAA2    | 11 | 18194497 | 11 | 18647778  | DEL | 452279  | BRC44 |
| SAA2    | 11 | 17893275 | 11 | 22775779  | DEL | 4881502 | BRC20 |
| SAA4    | 11 | 18194497 | 11 | 18647778  | DEL | 452279  | BRC44 |
| SAA4    | 11 | 17893275 | 11 | 22775779  | DEL | 4881502 | BRC20 |
| SAPS3   | 11 | 67922562 | 11 | 68579241  | DEL | 655678  | BRC42 |
| SAPS3   | 11 | 67595847 | 11 | 68472617  | DEL | 875767  | BRC5  |
| SAPS3   | 11 | 67625117 | 11 | 69724046  | DEL | 2097932 | BRC22 |
| SCFD2   | 4  | 52810288 | 4  | 55850342  | DEL | 3039054 | BRC44 |



|          |    |           |    |           |     |         |       |
|----------|----|-----------|----|-----------|-----|---------|-------|
| SCFD2    | 4  | 53612619  | 4  | 53616545  | DEL | 3923    | BRC16 |
| SHANK2   | 11 | 70500352  | 11 | 75317690  | DEL | 4816338 | BRC22 |
| SHANK2   | 11 | 70125563  | 11 | 70421278  | DEL | 294715  | BRC49 |
| SPTY2D1  | 11 | 18194497  | 11 | 18647778  | DEL | 452279  | BRC44 |
| SPTY2D1  | 11 | 17893275  | 11 | 22775779  | DEL | 4881502 | BRC20 |
| SUV420H1 | 11 | 67595847  | 11 | 68472617  | DEL | 875767  | BRC5  |
| SUV420H1 | 11 | 67625117  | 11 | 69724046  | DEL | 2097932 | BRC22 |
| TMEM86A  | 11 | 18652360  | 11 | 19574158  | DEL | 920798  | BRC44 |
| TMEM86A  | 11 | 17893275  | 11 | 22775779  | DEL | 4881502 | BRC20 |
| TPCN2    | 11 | 67922562  | 11 | 68579241  | DEL | 655678  | BRC42 |
| TPCN2    | 11 | 67625117  | 11 | 69724046  | DEL | 2097932 | BRC22 |
| TRIM37   | 15 | 52537209  | 17 | 54446827  | CTX | N/A     | BRC6  |
| TRIM37   | 17 | 51453440  | 17 | 54596095  | DEL | 3141649 | BRC35 |
| TSG101   | 11 | 18194497  | 11 | 18647778  | DEL | 452279  | BRC44 |
| TSG101   | 11 | 17893275  | 11 | 22775779  | DEL | 4881502 | BRC20 |
| TSHZ2    | 20 | 48611427  | 20 | 52279539  | DEL | 3667110 | BRC44 |
| TSHZ2    | 20 | 51401101  | 20 | 54975414  | DEL | 3573311 | BRC17 |
| TTC28    | 18 | 66785261  | 22 | 27395753  | CTX | N/A     | BRC39 |
| TTC28    | 4  | 121465798 | 22 | 27395518  | CTX | N/A     | BRC50 |
| UEVLD    | 11 | 18194497  | 11 | 18647778  | DEL | 452279  | BRC44 |
| UEVLD    | 11 | 17893275  | 11 | 22775779  | DEL | 4881502 | BRC20 |
| UVRAG    | 11 | 75510259  | 20 | 54698973  | CTX | N/A     | BRC5  |
| UVRAG    | 11 | 75371475  | 11 | 76722597  | DEL | 1350122 | BRC22 |
| ZDHHC13  | 11 | 18652360  | 11 | 19574158  | DEL | 920798  | BRC44 |
| ZDHHC13  | 11 | 17893275  | 11 | 22775779  | DEL | 4881502 | BRC20 |
| ZMAT4    | 8  | 40740842  | 20 | 60184832  | CTX | N/A     | BRC36 |
| ZMAT4    | 8  | 40572937  | 17 | 14834933  | CTX | N/A     | BRC3  |
| ZMAT4    | 8  | 40457726  | 8  | 43462159  | DEL | 3003427 | BRC49 |
| ZNF148   | 3  | 126424684 | 3  | 126448567 | DEL | 23882   | BRC32 |
| ZNF148   | 3  | 122695629 | 3  | 127635819 | DEL | 4939188 | BRC20 |
| ZNF217   | 20 | 48611427  | 20 | 52279539  | DEL | 3667110 | BRC44 |
| ZNF217   | 20 | 51401101  | 20 | 54975414  | DEL | 3573311 | BRC17 |

|         |    |           |    |           |     |         |       |
|---------|----|-----------|----|-----------|-----|---------|-------|
| ZNF259P | 6  | 105624358 | 6  | 109314541 | DEL | 3689183 | BRC11 |
| ZNF259P | 6  | 109214259 | 10 | 90840813  | CTX | N/A     | BRC21 |
| ZSCAN5A | 3  | 27727151  | 19 | 61472558  | CTX | N/A     | BRC47 |
| ZSCAN5A | 19 | 61479377  | 19 | 61887298  | DEL | 406919  | BRC17 |

### Supplementary Table 12: Recurrent SVs

This table shows structural-variation-affected genes found in more than one patient with chromosomal positions of each breakpoint (A, B), type of event (DEL deletion, CTX translocation), size of event in bp and patient ID. Only events less than 5 Mbp in size are listed.

| 5' sequence   | 3' sequence     | Event type | Number of possible in-frame proteins |
|---------------|-----------------|------------|--------------------------------------|
| <i>MAP2K5</i> | <i>WRB</i>      | CTX        | 8                                    |
| <i>LIN28B</i> | <i>ARMC2</i>    | DEL        | 9                                    |
| <i>GLI3</i>   | <i>ITPR2</i>    | CTX        | 4                                    |
| <i>CHDH</i>   | <i>ULK4</i>     | DEL        | 1                                    |
| <i>ELP3</i>   | <i>NRG1</i>     | DEL        | 2                                    |
| <i>NAV2</i>   | <i>C11orf49</i> | DEL        | 20                                   |
| <i>DNAH9</i>  | <i>MYOCD</i>    | DEL        | 3                                    |
| <i>BCAS3</i>  | <i>ATP8B4</i>   | CTX        | 12                                   |
| <i>LIMK2</i>  | <i>TGIF2</i>    | CTX        | 2                                    |
| <i>APIP</i>   | <i>ABTB2</i>    | DEL        | 1                                    |
| <i>ITPK1</i>  | <i>ACTN1</i>    | DEL        | 8                                    |
| <i>EXOC6</i>  | <i>MAGI1</i>    | CTX        | 2                                    |
| <i>EXOSC1</i> | <i>C6orf97</i>  | CTX        | 2                                    |
| <i>ZMAT4</i>  | <i>SS18L1</i>   | CTX        | 6                                    |

### Supplementary Table 13: Predicted fusions

The 5' and 3' portions of gene fusions that could produce in-frame protein(s) are listed with the type of event (DEL deletion, CTX translocation) and number of unique protein sequences that could result.

| Mechanism | Germline (n=5667) | Somatic (n=773) | P-value   |
|-----------|-------------------|-----------------|-----------|
| MMEJ      | 0.538             | 0.380           | 1.16E-006 |
| NAHR      | 0.100             | 0.019           | 1.57E-015 |
| VNTR      | 0.106             | 0.004           | < 2.2e-16 |
| NHEJ      | 0.256             | 0.596           | < 2.2e-16 |

### Supplementary Table 14: Somatic/germline SVs and mechanism

Inferred mechanisms are reported for 5,667 germline and 773 somatic structural variants (NHEJ non-homologous end joining, MMEJ microhomology mediated end joining, NAHR non-allelic homologous recombination, VNTR variable number tandem repeats). The p-value from Fisher's exact test comparing the frequency of each mechanism shows significantly more NHEJ in somatic cells.

| Pathway  | Name                                                             | Class                                                     | Samples Affected | Total Variations | p-value  | FDR      |
|----------|------------------------------------------------------------------|-----------------------------------------------------------|------------------|------------------|----------|----------|
| hsa05218 | Melanoma - Homo sapiens (human)                                  | Human Diseases; Cancers                                   | 51               | 77               | 1.37E-42 | 1.87E-41 |
| hsa05223 | Non-small cell lung cancer - Homo sapiens (human)                | Human Diseases; Cancers                                   | 48               | 68               | 5.33E-36 | 1.06E-34 |
| hsa05213 | Endometrial cancer - Homo sapiens (human)                        | Human Diseases; Cancers                                   | 50               | 71               | 1.5E-35  | 1.57E-34 |
| hsa05220 | Chronic myeloid leukemia - Homo sapiens (human)                  | Human Diseases; Cancers                                   | 49               | 73               | 2.32E-35 | 3.64E-34 |
| hsa05214 | Glioma - Homo sapiens (human)                                    | Human Diseases; Cancers                                   | 48               | 70               | 8.69E-35 | 9.52E-34 |
| hsa05215 | Prostate cancer - Homo sapiens (human)                           | Human Diseases; Cancers                                   | 49               | 79               | 9.04E-34 | 1.04E-32 |
| hsa05212 | Pancreatic cancer - Homo sapiens (human)                         | Human Diseases; Cancers                                   | 50               | 69               | 1.48E-30 | 1.47E-29 |
| hsa05210 | Colorectal cancer - Homo sapiens (human)                         | Human Diseases; Cancers                                   | 47               | 65               | 3.16E-30 | 2.89E-29 |
| hsa04722 | Neurotrophin signaling pathway - Homo sapiens (human)            | -                                                         | 48               | 78               | 1.67E-26 | 5.63E-26 |
| hsa04210 | Apoptosis - Homo sapiens (human)                                 | Cellular Processes; Cell Growth and Death                 | 46               | 62               | 1.65E-24 | 3.65E-24 |
| hsa05222 | Small cell lung cancer - Homo sapiens (human)                    | Human Diseases; Cancers                                   | 46               | 76               | 3.01E-24 | 5.50E-23 |
| hsa05221 | Acute myeloid leukemia - Homo sapiens (human)                    | Human Diseases; Cancers                                   | 43               | 53               | 8.81E-23 | 1.48E-21 |
| hsa05200 | Pathways in cancer - Homo sapiens (human)                        | Human Diseases; Cancers                                   | 56               | 124              | 2.89E-22 | 2.53E-21 |
| hsa04150 | mTOR signaling pathway - Homo sapiens (human)                    | Environmental Information Processing; Signal Transduction | 44               | 50               | 3.68E-22 | 8.06E-22 |
| hsa05211 | Renal cell carcinoma - Homo sapiens (human)                      | Human Diseases; Cancers                                   | 44               | 56               | 9.28E-22 | 8.84E-21 |
| hsa05160 | Hepatitis C - Homo sapiens (human)                               | Human Diseases; Infectious Diseases                       | 47               | 68               | 1.71E-21 | 1.44E-20 |
| hsa04664 | Fc epsilon RI signaling pathway - Homo sapiens (human)           | Organismal Systems; Immune System                         | 42               | 52               | 1.97E-19 | 6.07E-19 |
| hsa04012 | ErbB signaling pathway - Homo sapiens (human)                    | Environmental Information Processing; Signal Transduction | 43               | 58               | 4.42E-19 | 8.21E-19 |
| hsa04960 | Aldosterone-regulated sodium reabsorption - Homo sapiens (human) | Organismal Systems; Excretory System                      | 41               | 44               | 7.67E-19 | 3.29E-18 |
| hsa04620 | Toll-like receptor signaling pathway - Homo sapiens (human)      | Organismal Systems; Immune System                         | 43               | 54               | 1.84E-18 | 5.04E-18 |
| hsa04973 | Carbohydrate digestion and absorption - Homo sapiens (human)     | Organismal Systems; Digestive System                      | 42               | 46               | 7.12E-18 | 3.54E-17 |
| hsa04662 | B cell receptor signaling pathway - Homo sapiens (human)         | Organismal Systems; Immune System                         | 41               | 50               | 1.52E-16 | 4.64E-16 |
| hsa05100 | Bacterial invasion of epithelial cells - Homo sapiens (human)    | Human Diseases; Infectious Diseases                       | 42               | 51               | 3.57E-16 | 2.12E-15 |
| hsa04370 | VEGF signaling pathway - Homo sapiens (human)                    | Environmental Information Processing; Signal Transduction | 41               | 47               | 1.29E-15 | 3.15E-15 |
| hsa04930 | Type II diabetes mellitus - Homo sapiens (human)                 | Human Diseases; Metabolic Diseases                        | 42               | 46               | 2.58E-15 | 1.05E-14 |

|          |                                                                  |                                                           |    |    |          |          |
|----------|------------------------------------------------------------------|-----------------------------------------------------------|----|----|----------|----------|
| hsa04660 | T cell receptor signaling pathway - Homo sapiens (human)         | Organismal Systems; Immune System                         | 42 | 53 | 6E-15    | 1.80E-14 |
| hsa04910 | Insulin signaling pathway - Homo sapiens (human)                 | Organismal Systems; Endocrine System                      | 49 | 65 | 9.34E-15 | 3.47E-14 |
| hsa04650 | Natural killer cell mediated cytotoxicity - Homo sapiens (human) | Organismal Systems; Immune System                         | 43 | 54 | 1.4E-14  | 4.14E-14 |
| hsa05142 | Chagas disease - Homo sapiens (human)                            | Human Diseases; Infectious Diseases                       | 43 | 51 | 1.87E-14 | 1.32E-13 |
| hsa00562 | Inositol phosphate metabolism - Homo sapiens (human)             | Metabolism; Carbohydrate Metabolism                       | 42 | 47 | 2.84E-14 | 3.70E-14 |
| hsa05219 | Bladder cancer - Homo sapiens (human)                            | Human Diseases; Cancers                                   | 28 | 33 | 8.07E-14 | 1.18E-12 |
| hsa04810 | Regulation of actin cytoskeleton - Homo sapiens (human)          | Cellular Processes; Cell Motility                         | 49 | 80 | 1.94E-13 | 7.07E-13 |
| hsa04666 | Fc gamma R-mediated phagocytosis - Homo sapiens (human)          | Organismal Systems; Immune System                         | 42 | 51 | 2.13E-13 | 6.67E-13 |
| hsa04914 | Progesterone-mediated oocyte maturation - Homo sapiens (human)   | Organismal Systems; Endocrine System                      | 45 | 50 | 3.86E-13 | 1.48E-12 |
| hsa04510 | Focal adhesion - Homo sapiens (human)                            | Cellular Processes; Cell Communication                    | 54 | 96 | 4.73E-13 | 1.16E-12 |
| hsa05216 | Thyroid cancer - Homo sapiens (human)                            | Human Diseases; Cancers                                   | 26 | 28 | 1.85E-12 | 2.25E-11 |
| hsa04630 | Jak-STAT signaling pathway - Homo sapiens (human)                | Environmental Information Processing; Signal Transduction | 42 | 55 | 3.49E-12 | 1.01E-11 |
| hsa04670 | Leukocyte transendothelial migration - Homo sapiens (human)      | Organismal Systems; Immune System                         | 41 | 50 | 3.62E-11 | 1.15E-10 |
| hsa05146 | Amoebiasis - Homo sapiens (human)                                | Human Diseases; Infectious Diseases                       | 48 | 62 | 5.18E-11 | 4.05E-10 |
| hsa04070 | Phosphatidylinositol signaling system - Homo sapiens (human)     | Environmental Information Processing; Signal Transduction | 43 | 50 | 5.59E-11 | 1.07E-10 |
| hsa04062 | Chemokine signaling pathway - Homo sapiens (human)               | Organismal Systems; Immune System                         | 46 | 58 | 2.09E-10 | 3.99E-10 |
| hsa05145 | Toxoplasmosis - Homo sapiens (human)                             | Human Diseases; Infectious Diseases                       | 43 | 53 | 4.4E-10  | 3.33E-09 |
| hsa04110 | Cell cycle - Homo sapiens (human)                                | Cellular Processes; Cell Growth and Death                 | 25 | 39 | 1.09E-06 | 2.13E-06 |
| hsa04010 | MAPK signaling pathway - Homo sapiens (human)                    | Environmental Information Processing; Signal Transduction | 41 | 63 | 4.18E-06 | 7.70E-06 |
| hsa04115 | p53 signaling pathway - Homo sapiens (human)                     | Cellular Processes; Cell Growth and Death                 | 19 | 23 | 2.45E-05 | 4.88E-05 |
| hsa05217 | Basal cell carcinoma - Homo sapiens (human)                      | Human Diseases; Cancers                                   | 19 | 21 | 0.000119 | 0.001539 |
| hsa05014 | Amyotrophic lateral sclerosis (ALS) - Homo sapiens (human)       | Human Diseases; Neurodegenerative Diseases                | 18 | 19 | 0.000231 | 0.001266 |
| hsa04310 | Wnt signaling pathway - Homo sapiens (human)                     | Environmental Information Processing; Signal Transduction | 29 | 36 | 0.000324 | 0.000739 |
| hsa04622 | RIG-I-like receptor signaling pathway - Homo sapiens (human)     | Organismal Systems; Immune System                         | 14 | 17 | 0.001069 | 0.003001 |
| hsa05016 | Huntington's disease - Homo sapiens (human)                      | Human Diseases; Neurodegenerative Diseases                | 28 | 33 | 0.006591 | 0.037013 |

|          |                                                                            |                                                                           |    |    |          |          |
|----------|----------------------------------------------------------------------------|---------------------------------------------------------------------------|----|----|----------|----------|
| hsa04912 | GnRH signaling pathway - Homo sapiens (human)                              | Organismal Systems; Endocrine System                                      | 17 | 25 | 0.007411 | 0.027981 |
| hsa04120 | Ubiquitin mediated proteolysis - Homo sapiens (human)                      | Genetic Information Processing; Folding; Sorting and Degradation          | 24 | 32 | 0.012756 | 0.025629 |
| hsa03420 | Nucleotide excision repair - Homo sapiens (human)                          | Genetic Information Processing; Replication and Repair                    | 10 | 12 | 0.017104 | 0.030453 |
| hsa05416 | Viral myocarditis - Homo sapiens (human)                                   | Human Diseases; Cardiovascular Diseases                                   | 14 | 20 | 0.02079  | 1        |
| hsa04080 | Neuroactive ligand-receptor interaction - Homo sapiens (human)             | Environmental Information Processing; Signaling Molecules and Interaction | 24 | 37 | 0.028058 | 0.054378 |
| hsa04974 | Protein digestion and absorption - Homo sapiens (human)                    | Organismal Systems; Digestive System                                      | 18 | 23 | 0.031882 | 0.162376 |
| hsa00130 | Ubiquinone and other terpenoid-quinone biosynthesis - Homo sapiens (human) | Metabolism; Metabolism of Cofactors and Vitamins                          | 4  | 4  | 0.034949 | 0.037155 |
| hsa04950 | Maturity onset diabetes of the young - Homo sapiens (human)                | Human Diseases; Metabolic Diseases                                        | 6  | 6  | 0.041644 | 0.175385 |
| hsa00561 | Glycerolipid metabolism - Homo sapiens (human)                             | Metabolism; Lipid Metabolism                                              | 11 | 11 | 0.054869 | 0.071102 |
| hsa05130 | Pathogenic Escherichia coli infection - Homo sapiens (human)               | Human Diseases; Infectious Diseases                                       | 10 | 11 | 0.067036 | 0.431791 |
| hsa03440 | Homologous recombination - Homo sapiens (human)                            | Genetic Information Processing; Replication and Repair                    | 6  | 8  | 0.067147 | 0.121531 |
| hsa04530 | Tight junction - Homo sapiens (human)                                      | Cellular Processes; Cell Communication                                    | 17 | 26 | 0.070028 | 0.180425 |
| hsa04350 | TGF-beta signaling pathway - Homo sapiens (human)                          | Environmental Information Processing; Signal Transduction                 | 12 | 15 | 0.07945  | 0.189126 |
| hsa04740 | Olfactory transduction - Homo sapiens (human)                              | -                                                                         | 21 | 33 | 0.082354 | 0.286278 |
| hsa03450 | Non-homologous end-joining - Homo sapiens (human)                          | Genetic Information Processing; Replication and Repair                    | 5  | 6  | 0.087573 | 0.159821 |
| hsa04512 | ECM-receptor interaction - Homo sapiens (human)                            | Environmental Information Processing; Signaling Molecules and Interaction | 21 | 30 | 0.095315 | 0.237204 |
| hsa04270 | Vascular smooth muscle contraction - Homo sapiens (human)                  | Organismal Systems; Circulatory System                                    | 22 | 25 | 0.10101  | 0.228054 |
| hsa04141 | Protein processing in endoplasmic reticulum - Homo sapiens (human)         | Genetic Information Processing; Folding; Sorting and Degradation          | 10 | 20 | 0.10784  | 0.224923 |
| hsa04916 | Melanogenesis - Homo sapiens (human)                                       | Organismal Systems; Endocrine System                                      | 15 | 17 | 0.12045  | 0.471046 |
| hsa03030 | DNA replication - Homo sapiens (human)                                     | Genetic Information Processing; Replication and Repair                    | 7  | 8  | 0.12229  | 0.207609 |
| hsa04514 | Cell adhesion molecules (CAMs) - Homo sapiens (human)                      | Environmental Information Processing; Signaling Molecules and Interaction | 19 | 22 | 0.13817  | 0.347807 |
| hsa00061 | Fatty acid biosynthesis - Homo sapiens (human)                             | Metabolism; Lipid Metabolism                                              | 3  | 4  | 0.15058  | 0.155552 |
| hsa03430 | Mismatch repair - Homo sapiens (human)                                     | Genetic Information Processing; Replication and Repair                    | 6  | 6  | 0.15527  | 0.278722 |
| hsa04520 | Adherens junction - Homo sapiens (human)                                   | Cellular Processes; Cell Communication                                    | 18 | 18 | 0.1574   | 0.400821 |
| hsa04360 | Axon guidance - Homo sapiens (human)                                       | -                                                                         | 16 | 25 | 0.15912  | 0.382937 |

|          |                                                                                   |                                                                  |    |    |         |          |
|----------|-----------------------------------------------------------------------------------|------------------------------------------------------------------|----|----|---------|----------|
| hsa04962 | Vasopressin-regulated water reabsorption - Homo sapiens (human)                   | Organismal Systems; Excretory System                             | 8  | 9  | 0.17427 | 0.763303 |
| hsa00533 | Glycosaminoglycan biosynthesis - keratan sulfate - Homo sapiens (human)           | Metabolism; Glycan Biosynthesis and Metabolism                   | 2  | 3  | 0.19315 | 0.247368 |
| hsa04730 | Long-term depression - Homo sapiens (human)                                       | -                                                                | 15 | 15 | 0.21034 | 0.719757 |
| hsa03040 | Spliceosome - Homo sapiens (human)                                                | Genetic Information Processing; Transcription                    | 13 | 16 | 0.21902 | 0.37473  |
| hsa00472 | D-Arginine and D-ornithine metabolism - Homo sapiens (human)                      | Metabolism; Metabolism of Other Amino Acids                      | 1  | 1  | 0.22913 | 0.275711 |
| hsa00260 | Glycine; serine and threonine metabolism - Homo sapiens (human)                   | Metabolism; Amino Acid Metabolism                                | 3  | 5  | 0.24078 | 0.264979 |
| hsa00524 | Butirosin and neomycin biosynthesis - Homo sapiens (human)                        | Metabolism; Biosynthesis of Other Secondary Metabolites          | 2  | 2  | 0.24425 | 0.307418 |
| hsa04614 | Renin-angiotensin system - Homo sapiens (human)                                   | Organismal Systems; Endocrine System                             | 4  | 4  | 0.24757 | 0.669356 |
| hsa05120 | Epithelial cell signaling in Helicobacter pylori infection - Homo sapiens (human) | Human Diseases; Infectious Diseases                              | 9  | 10 | 0.25031 | 1        |
| hsa03018 | RNA degradation - Homo sapiens (human)                                            | Genetic Information Processing; Folding; Sorting and Degradation | 9  | 9  | 0.26945 | 0.447042 |
| hsa04720 | Long-term potentiation - Homo sapiens (human)                                     | -                                                                | 13 | 14 | 0.27912 | 0.926171 |
| hsa00190 | Oxidative phosphorylation - Homo sapiens (human)                                  | Metabolism; Energy Metabolism                                    | 7  | 8  | 0.30397 | 0.326321 |
| hsa04623 | Cytosolic DNA-sensing pathway - Homo sapiens (human)                              | Organismal Systems; Immune System                                | 6  | 6  | 0.31928 | 0.908082 |
| hsa04130 | SNARE interactions in vesicular transport - Homo sapiens (human)                  | Genetic Information Processing; Folding; Sorting and Degradation | 3  | 3  | 0.32475 | 0.664675 |
| hsa00600 | Sphingolipid metabolism - Homo sapiens (human)                                    | Metabolism; Lipid Metabolism                                     | 5  | 5  | 0.33016 | 0.4491   |
| hsa00601 | Glycosphingolipid biosynthesis - lacto and neolacto series - Homo sapiens (human) | Metabolism; Glycan Biosynthesis and Metabolism                   | 2  | 3  | 0.33896 | 0.463952 |
| hsa03022 | Basal transcription factors - Homo sapiens (human)                                | Genetic Information Processing; Transcription                    | 5  | 5  | 0.35028 | 0.590087 |
| hsa04710 | Circadian rhythm - mammal - Homo sapiens (human)                                  | -                                                                | 4  | 4  | 0.35245 | 1        |
| hsa00052 | Galactose metabolism - Homo sapiens (human)                                       | Metabolism; Carbohydrate Metabolism                              | 5  | 5  | 0.35556 | 0.363867 |
| hsa03320 | PPAR signaling pathway - Homo sapiens (human)                                     | Organismal Systems; Endocrine System                             | 6  | 8  | 0.35624 | 0.624132 |
| hsa00270 | Cysteine and methionine metabolism - Homo sapiens (human)                         | Metabolism; Amino Acid Metabolism                                | 2  | 4  | 0.35883 | 0.396888 |
| hsa00531 | Glycosaminoglycan degradation - Homo sapiens (human)                              | Metabolism; Glycan Biosynthesis and Metabolism                   | 3  | 3  | 0.36053 | 0.456393 |
| hsa00400 | Phenylalanine; tyrosine and tryptophan biosynthesis - Homo sapiens (human)        | Metabolism; Amino Acid Metabolism                                | 1  | 1  | 0.37022 | 0.431267 |
| hsa00650 | Butanoate metabolism - Homo sapiens (human)                                       | Metabolism; Carbohydrate Metabolism                              | 4  | 4  | 0.3739  | 0.531715 |

|          |                                                                             |                                                                  |    |    |         |          |
|----------|-----------------------------------------------------------------------------|------------------------------------------------------------------|----|----|---------|----------|
| hsa05320 | Autoimmune thyroid disease - Homo sapiens (human)                           | Human Diseases; Immune System Diseases                           | 3  | 4  | 0.38364 | 1        |
| hsa00350 | Tyrosine metabolism - Homo sapiens (human)                                  | Metabolism; Amino Acid Metabolism                                | 5  | 5  | 0.38915 | 0.446198 |
| hsa00750 | Vitamin B6 metabolism - Homo sapiens (human)                                | Metabolism; Metabolism of Cofactors and Vitamins                 | 1  | 1  | 0.39913 | 0.58273  |
| hsa04122 | Sulfur relay system - Homo sapiens (human)                                  | Genetic Information Processing; Folding; Sorting and Degradation | 1  | 1  | 0.4063  | 0.823886 |
| hsa04920 | Adipocytokine signaling pathway - Homo sapiens (human)                      | Organismal Systems; Endocrine System                             | 9  | 9  | 0.40959 | 1        |
| hsa00512 | O-Glycan biosynthesis - Homo sapiens (human)                                | Metabolism; Glycan Biosynthesis and Metabolism                   | 4  | 4  | 0.41715 | 0.516135 |
| hsa04621 | NOD-like receptor signaling pathway - Homo sapiens (human)                  | Organismal Systems; Immune System                                | 7  | 7  | 0.42044 | 1        |
| hsa00062 | Fatty acid elongation in mitochondria - Homo sapiens (human)                | Metabolism; Lipid Metabolism                                     | 1  | 1  | 0.4261  | 0.442255 |
| hsa00360 | Phenylalanine metabolism - Homo sapiens (human)                             | Metabolism; Amino Acid Metabolism                                | 2  | 2  | 0.44158 | 0.508979 |
| hsa00790 | Folate biosynthesis - Homo sapiens (human)                                  | Metabolism; Metabolism of Cofactors and Vitamins                 | 1  | 1  | 0.44436 | 0.671137 |
| hsa03060 | Protein export - Homo sapiens (human)                                       | Genetic Information Processing; Folding; Sorting and Degradation | 2  | 2  | 0.44509 | 0.773609 |
| hsa00450 | Selenoamino acid metabolism - Homo sapiens (human)                          | Metabolism; Metabolism of Other Amino Acids                      | 3  | 3  | 0.45061 | 0.533425 |
| hsa05150 | Staphylococcus aureus infection - Homo sapiens (human)                      | -                                                                | 6  | 6  | 0.45257 | 1        |
| hsa05322 | Systemic lupus erythematosus - Homo sapiens (human)                         | Human Diseases; Immune System Diseases                           | 8  | 8  | 0.45652 | 1        |
| hsa04964 | Proximal tubule bicarbonate reclamation - Homo sapiens (human)              | Organismal Systems; Excretory System                             | 3  | 3  | 0.45975 | 1        |
| hsa05410 | Hypertrophic cardiomyopathy (HCM) - Homo sapiens (human)                    | Human Diseases; Cardiovascular Diseases                          | 14 | 21 | 0.46456 | 1        |
| hsa05110 | Vibrio cholerae infection - Homo sapiens (human)                            | Human Diseases; Infectious Diseases                              | 6  | 7  | 0.46538 | 1        |
| hsa00770 | Pantothenate and CoA biosynthesis - Homo sapiens (human)                    | Metabolism; Metabolism of Cofactors and Vitamins                 | 2  | 2  | 0.46829 | 0.692943 |
| hsa00532 | Glycosaminoglycan biosynthesis - chondroitin sulfate - Homo sapiens (human) | Metabolism; Glycan Biosynthesis and Metabolism                   | 2  | 2  | 0.47127 | 0.600047 |
| hsa00520 | Amino sugar and nucleotide sugar metabolism - Homo sapiens (human)          | Metabolism; Carbohydrate Metabolism                              | 5  | 5  | 0.47475 | 0.594116 |
| hsa04114 | Oocyte meiosis - Homo sapiens (human)                                       | Cellular Processes; Cell Growth and Death                        | 10 | 14 | 0.47695 | 0.941009 |
| hsa00430 | Taurine and hypotaurine metabolism - Homo sapiens (human)                   | Metabolism; Metabolism of Other Amino Acids                      | 1  | 1  | 0.48956 | 0.576417 |
| hsa03020 | RNA polymerase - Homo sapiens (human)                                       | Genetic Information Processing; Transcription                    | 3  | 3  | 0.49087 | 0.820615 |
| hsa05010 | Alzheimer's disease - Homo sapiens (human)                                  | Human Diseases; Neurodegenerative Diseases                       | 16 | 18 | 0.49259 | 1        |



|          |                                                                      |                                                                  |    |    |         |          |
|----------|----------------------------------------------------------------------|------------------------------------------------------------------|----|----|---------|----------|
| hsa04940 | Type I diabetes mellitus - Homo sapiens (human)                      | Human Diseases; Metabolic Diseases                               | 3  | 3  | 0.4936  | 1        |
| hsa00511 | Other glycan degradation - Homo sapiens (human)                      | Metabolism; Glycan Biosynthesis and Metabolism                   | 2  | 2  | 0.49798 | 0.612683 |
| hsa05140 | Leishmaniasis - Homo sapiens (human)                                 | Human Diseases; Infectious Diseases                              | 7  | 7  | 0.50129 | 1        |
| hsa04260 | Cardiac muscle contraction - Homo sapiens (human)                    | Organismal Systems; Circulatory System                           | 8  | 9  | 0.50663 | 1        |
| hsa00340 | Histidine metabolism - Homo sapiens (human)                          | Metabolism; Amino Acid Metabolism                                | 3  | 3  | 0.50715 | 0.578468 |
| hsa05012 | Parkinson's disease - Homo sapiens (human)                           | Human Diseases; Neurodegenerative Diseases                       | 7  | 7  | 0.51304 | 1        |
| hsa00603 | Glycosphingolipid biosynthesis - globo series - Homo sapiens (human) | Metabolism; Glycan Biosynthesis and Metabolism                   | 1  | 1  | 0.52013 | 0.716405 |
| hsa00740 | Riboflavin metabolism - Homo sapiens (human)                         | Metabolism; Metabolism of Cofactors and Vitamins                 | 1  | 1  | 0.52051 | 0.754912 |
| hsa04020 | Calcium signaling pathway - Homo sapiens (human)                     | Environmental Information Processing; Signal Transduction        | 25 | 31 | 0.52108 | 0.975355 |
| hsa05332 | Graft-versus-host disease - Homo sapiens (human)                     | Human Diseases; Immune System Diseases                           | 2  | 2  | 0.5223  | 1        |
| hsa05414 | Dilated cardiomyopathy - Homo sapiens (human)                        | Human Diseases; Cardiovascular Diseases                          | 15 | 22 | 0.5245  | 1        |
| hsa05020 | Prion diseases - Homo sapiens (human)                                | Human Diseases; Neurodegenerative Diseases                       | 4  | 4  | 0.52686 | 1        |
| hsa04340 | Hedgehog signaling pathway - Homo sapiens (human)                    | Environmental Information Processing; Signal Transduction        | 5  | 6  | 0.5382  | 1        |
| hsa04145 | Phagosome - Homo sapiens (human)                                     | Cellular Processes; Transport and Catabolism                     | 12 | 16 | 0.53888 | 1        |
| hsa04612 | Antigen processing and presentation - Homo sapiens (human)           | Organismal Systems; Immune System                                | 5  | 5  | 0.54111 | 1        |
| hsa00900 | Terpenoid backbone biosynthesis - Homo sapiens (human)               | Metabolism; Metabolism of Terpenoids and Polyketides             | 1  | 1  | 0.55602 | 0.857524 |
| hsa05340 | Primary immunodeficiency - Homo sapiens (human)                      | Human Diseases; Immune System Diseases                           | 3  | 3  | 0.5711  | 1        |
| hsa03050 | Proteasome - Homo sapiens (human)                                    | Genetic Information Processing; Folding; Sorting and Degradation | 3  | 3  | 0.57383 | 0.989518 |
| hsa00051 | Fructose and mannose metabolism - Homo sapiens (human)               | Metabolism; Carbohydrate Metabolism                              | 2  | 3  | 0.58473 | 0.595609 |
| hsa04140 | Regulation of autophagy - Homo sapiens (human)                       | Cellular Processes; Transport and Catabolism                     | 2  | 2  | 0.59623 | 1        |
| hsa04966 | Collecting duct acid secretion - Homo sapiens (human)                | Organismal Systems; Excretory System                             | 2  | 2  | 0.60016 | 1        |
| hsa00240 | Pyrimidine metabolism - Homo sapiens (human)                         | Metabolism; Nucleotide Metabolism                                | 9  | 9  | 0.60128 | 0.655126 |
| hsa04971 | Gastric acid secretion - Homo sapiens (human)                        | Organismal Systems; Digestive System                             | 11 | 11 | 0.60183 | 1        |
| hsa04320 | Dorso-ventral axis formation - Homo sapiens (human)                  | -                                                                | 4  | 4  | 0.6063  | 1        |

|          |                                                                               |                                                                           |    |    |         |          |
|----------|-------------------------------------------------------------------------------|---------------------------------------------------------------------------|----|----|---------|----------|
| hsa01040 | Biosynthesis of unsaturated fatty acids - Homo sapiens (human)                | Metabolism; Lipid Metabolism                                              | 1  | 1  | 0.61504 | 0.997732 |
| hsa00630 | Glyoxylate and dicarboxylate metabolism - Homo sapiens (human)                | Metabolism; Carbohydrate Metabolism                                       | 1  | 1  | 0.61559 | 0.864194 |
| hsa04972 | Pancreatic secretion - Homo sapiens (human)                                   | Organismal Systems; Digestive System                                      | 14 | 15 | 0.61876 | 1        |
| hsa00100 | Steroid biosynthesis - Homo sapiens (human)                                   | Metabolism; Lipid Metabolism                                              | 1  | 1  | 0.62298 | 0.655926 |
| hsa00120 | Primary bile acid biosynthesis - Homo sapiens (human)                         | Metabolism; Lipid Metabolism                                              | 1  | 1  | 0.62438 | 0.660576 |
| hsa05144 | Malaria - Homo sapiens (human)                                                | Human Diseases; Infectious Diseases                                       | 4  | 5  | 0.62611 | 1        |
| hsa00310 | Lysine degradation - Homo sapiens (human)                                     | Metabolism; Amino Acid Metabolism                                         | 4  | 6  | 0.64772 | 0.731189 |
| hsa03410 | Base excision repair - Homo sapiens (human)                                   | Genetic Information Processing; Replication and Repair                    | 3  | 3  | 0.65427 | 1        |
| hsa05330 | Allograft rejection - Homo sapiens (human)                                    | Human Diseases; Immune System Diseases                                    | 1  | 1  | 0.66143 | 1        |
| hsa05412 | Arrhythmogenic right ventricular cardiomyopathy (ARVC) - Homo sapiens (human) | Human Diseases; Cardiovascular Diseases                                   | 10 | 13 | 0.67364 | 1        |
| hsa04742 | Taste transduction - Homo sapiens (human)                                     | -                                                                         | 5  | 5  | 0.68341 | 1        |
| hsa00510 | N-Glycan biosynthesis - Homo sapiens (human)                                  | Metabolism; Glycan Biosynthesis and Metabolism                            | 4  | 4  | 0.68493 | 0.837987 |
| hsa00910 | Nitrogen metabolism - Homo sapiens (human)                                    | Metabolism; Energy Metabolism                                             | 1  | 1  | 0.68645 | 1        |
| hsa04060 | Cytokine-cytokine receptor interaction - Homo sapiens (human)                 | Environmental Information Processing; Signaling Molecules and Interaction | 14 | 17 | 0.69724 | 1        |
| hsa05131 | Shigellosis - Homo sapiens (human)                                            | Human Diseases; Infectious Diseases                                       | 5  | 5  | 0.71297 | 1        |
| hsa00670 | One carbon pool by folate - Homo sapiens (human)                              | Metabolism; Metabolism of Cofactors and Vitamins                          | 1  | 1  | 0.71387 | 1        |
| hsa00500 | Starch and sucrose metabolism - Homo sapiens (human)                          | Metabolism; Carbohydrate Metabolism                                       | 6  | 6  | 0.71468 | 0.869527 |
| hsa00760 | Nicotinate and nicotinamide metabolism - Homo sapiens (human)                 | Metabolism; Metabolism of Cofactors and Vitamins                          | 1  | 1  | 0.72169 | 1        |
| hsa04970 | Salivary secretion - Homo sapiens (human)                                     | Organismal Systems; Digestive System                                      | 13 | 13 | 0.72221 | 1        |
| hsa00410 | beta-Alanine metabolism - Homo sapiens (human)                                | Metabolism; Metabolism of Other Amino Acids                               | 1  | 1  | 0.73154 | 0.856723 |
| hsa04640 | Hematopoietic cell lineage - Homo sapiens (human)                             | Organismal Systems; Immune System                                         | 7  | 7  | 0.73655 | 1        |
| hsa00620 | Pyruvate metabolism - Homo sapiens (human)                                    | Metabolism; Carbohydrate Metabolism                                       | 3  | 3  | 0.73911 | 1        |
| hsa00591 | Linoleic acid metabolism - Homo sapiens (human)                               | Metabolism; Lipid Metabolism                                              | 1  | 1  | 0.74455 | 1        |
| hsa04744 | Phototransduction - Homo sapiens (human)                                      | Organismal Systems; Sensory System                                        | 1  | 1  | 0.75416 | 1        |
| hsa04540 | Gap junction - Homo sapiens (human)                                           | Cellular Processes; Cell Communication                                    | 11 | 11 | 0.75479 | 1        |

|          |                                                                         |                                                          |    |    |         |          |
|----------|-------------------------------------------------------------------------|----------------------------------------------------------|----|----|---------|----------|
| hsa04144 | Endocytosis - Homo sapiens (human)                                      | Cellular Processes; Transport and Catabolism             | 20 | 23 | 0.75718 | 1        |
| hsa00534 | Glycosaminoglycan biosynthesis - heparan sulfate - Homo sapiens (human) | Metabolism; Glycan Biosynthesis and Metabolism           | 1  | 1  | 0.76293 | 0.982833 |
| hsa04672 | Intestinal immune network for IgA production - Homo sapiens (human)     | Organismal Systems; Immune System                        | 1  | 1  | 0.77124 | 1        |
| hsa00010 | Glycolysis / Gluconeogenesis - Homo sapiens (human)                     | Metabolism; Carbohydrate Metabolism                      | 3  | 4  | 0.77731 | 0.77731  |
| hsa00230 | Purine metabolism - Homo sapiens (human)                                | Metabolism; Nucleotide Metabolism                        | 13 | 16 | 0.7811  | 0.842665 |
| hsa00983 | Drug metabolism - other enzymes - Homo sapiens (human)                  | Metabolism; Xenobiotics Biodegradation and Metabolism    | 2  | 3  | 0.79294 | 1        |
| hsa04610 | Complement and coagulation cascades - Homo sapiens (human)              | Organismal Systems; Immune System                        | 7  | 7  | 0.79399 | 1        |
| hsa00565 | Ether lipid metabolism - Homo sapiens (human)                           | Metabolism; Lipid Metabolism                             | 1  | 1  | 0.79534 | 1        |
| hsa00053 | Ascorbate and aldarate metabolism - Homo sapiens (human)                | Metabolism; Carbohydrate Metabolism                      | 1  | 1  | 0.80491 | 0.827584 |
| hsa00564 | Glycerophospholipid metabolism - Homo sapiens (human)                   | Metabolism; Lipid Metabolism                             | 5  | 5  | 0.80602 | 1        |
| hsa00830 | Retinol metabolism - Homo sapiens (human)                               | Metabolism; Metabolism of Cofactors and Vitamins         | 4  | 4  | 0.80621 | 1        |
| hsa00140 | Steroid hormone biosynthesis - Homo sapiens (human)                     | Metabolism; Lipid Metabolism                             | 3  | 3  | 0.80836 | 0.863565 |
| hsa03010 | Ribosome - Homo sapiens (human)                                         | Genetic Information Processing; Translation              | 1  | 1  | 0.81469 | 1        |
| hsa00380 | Tryptophan metabolism - Homo sapiens (human)                            | Metabolism; Amino Acid Metabolism                        | 2  | 2  | 0.82688 | 0.958131 |
| hsa00020 | Citrate cycle (TCA cycle) - Homo sapiens (human)                        | Metabolism; Carbohydrate Metabolism                      | 1  | 1  | 0.82941 | 0.833215 |
| hsa00590 | Arachidonic acid metabolism - Homo sapiens (human)                      | Metabolism; Lipid Metabolism                             | 1  | 2  | 0.83072 | 1        |
| hsa02010 | ABC transporters - Homo sapiens (human)                                 | Environmental Information Processing; Membrane Transport | 8  | 9  | 0.83499 | 1        |
| hsa00860 | Porphyryn and chlorophyll metabolism - Homo sapiens (human)             | Metabolism; Metabolism of Cofactors and Vitamins         | 2  | 2  | 0.83624 | 1        |
| hsa00040 | Pentose and glucuronate interconversions - Homo sapiens (human)         | Metabolism; Carbohydrate Metabolism                      | 1  | 1  | 0.83643 | 0.848047 |
| hsa00071 | Fatty acid metabolism - Homo sapiens (human)                            | Metabolism; Lipid Metabolism                             | 2  | 2  | 0.83722 | 0.873101 |
| hsa00480 | Glutathione metabolism - Homo sapiens (human)                           | Metabolism; Metabolism of Other Amino Acids              | 1  | 1  | 0.83856 | 1        |
| hsa00980 | Metabolism of xenobiotics by cytochrome P450 - Homo sapiens (human)     | Metabolism; Xenobiotics Biodegradation and Metabolism    | 3  | 3  | 0.8753  | 1        |
| hsa00640 | Propanoate metabolism - Homo sapiens (human)                            | Metabolism; Carbohydrate Metabolism                      | 1  | 1  | 0.8776  | 1        |
| hsa04146 | Peroxisome - Homo sapiens (human)                                       | Cellular Processes; Transport and Catabolism             | 4  | 4  | 0.88583 | 1        |

|          |                                                                   |                                                           |   |   |         |          |
|----------|-------------------------------------------------------------------|-----------------------------------------------------------|---|---|---------|----------|
| hsa00330 | Arginine and proline metabolism - Homo sapiens (human)            | Metabolism; Amino Acid Metabolism                         | 2 | 2 | 0.8914  | 1        |
| hsa00280 | Valine; leucine and isoleucine degradation - Homo sapiens (human) | Metabolism; Amino Acid Metabolism                         | 1 | 1 | 0.89371 | 0.993515 |
| hsa04142 | Lysosome - Homo sapiens (human)                                   | Cellular Processes; Transport and Catabolism              | 9 | 9 | 0.90046 | 1        |
| hsa00982 | Drug metabolism - cytochrome P450 - Homo sapiens (human)          | Metabolism; Xenobiotics Biodegradation and Metabolism     | 3 | 3 | 0.90717 | 1        |
| hsa00970 | Aminoacyl-tRNA biosynthesis - Homo sapiens (human)                | Genetic Information Processing; Translation               | 2 | 2 | 0.90926 | 1        |
| hsa04330 | Notch signaling pathway - Homo sapiens (human)                    | Environmental Information Processing; Signal Transduction | 3 | 3 | 0.9289  | 1        |

### Supplementary Table 15: Standard pathway analysis

Significantly altered pathways were identified by PathScan. Those classified by KEGG (Kyoto Encyclopedia of Genes and Genomes) as cancer pathways were removed, since they dominated the list and provided no new information. “Samples Affected” represents the number of samples in which one or more gene from this pathway has a non-silent variant and “Total Variations” denotes the total number of variations that alter this pathway across all samples (variants altering the same gene in a sample are treated as one variant). Multiple-testing correction is again calculated by the Benjamini-Hochberg FDR.

| Significantly mutated pathways in AI Responders | Samples_Affected | Total_Variations | p-value  | FDR      | Significantly mutated pathways in AI Nonresponders | Samples_Affected | Total_Variations | p-value  | FDR      |
|-------------------------------------------------|------------------|------------------|----------|----------|----------------------------------------------------|------------------|------------------|----------|----------|
| Neurotrophin signaling pathway                  | 28               | 44               | 1.34E-16 | 4.5E-16  | Apoptosis                                          | 18               | 29               | 1.64E-13 | 3.62E-13 |
| mTOR signaling pathway                          | 27               | 31               | 5.22E-16 | 1.14E-15 | Neurotrophin signaling pathway                     | 20               | 34               | 2.53E-12 | 8.51E-12 |
| Aldosterone-regulated sodium reabsorption       | 26               | 29               | 4.3E-15  | 1.84E-14 | mTOR signaling pathway                             | 17               | 19               | 1.3E-08  | 2.84E-08 |
| ErbB signaling pathway                          | 27               | 36               | 3.48E-14 | 6.45E-14 | Fc epsilon RI signaling pathway                    | 16               | 21               | 1.74E-08 | 5.36E-08 |
| Carbohydrate digestion and absorption           | 27               | 30               | 3.5E-14  | 1.74E-13 | Toll-like receptor signaling pathway               | 15               | 22               | 2.24E-08 | 6.14E-08 |
| Apoptosis                                       | 28               | 33               | 2.49E-13 | 5.5E-13  | ErbB signaling pathway                             | 16               | 22               | 2.93E-07 | 5.43E-07 |
| Fc epsilon RI signaling pathway                 | 26               | 31               | 3.59E-13 | 1.11E-12 | Jak-STAT signaling pathway                         | 15               | 24               | 1.5E-06  | 4.31E-06 |
| Inositol phosphate metabolism                   | 26               | 31               | 2.95E-12 | 3.84E-12 | B cell receptor signaling pathway                  | 15               | 19               | 1.69E-06 | 5.13E-06 |
| Toll-like receptor signaling pathway            | 28               | 32               | 2.95E-12 | 8.07E-12 | Natural killer cell mediated cytotoxicity          | 17               | 22               | 2.43E-06 | 7.18E-06 |
| B cell receptor signaling pathway               | 26               | 31               | 2.93E-12 | 8.93E-12 | Fc gamma R-mediated phagocytosis                   | 16               | 21               | 2.71E-06 | 8.47E-06 |
| VEGF signaling pathway                          | 26               | 30               | 3.87E-12 | 9.41E-12 | Aldosterone-regulated sodium reabsorption          | 15               | 15               | 2.8E-06  | 1.2E-05  |
| T cell receptor signaling pathway               | 26               | 33               | 1.73E-11 | 5.18E-11 | **p53 signaling pathway                            | 11               | 15               | 7.75E-06 | 1.54E-05 |
| Insulin signaling pathway                       | 31               | 40               | 3.58E-11 | 1.33E-10 | Carbohydrate digestion and absorption              | 15               | 16               | 3.85E-06 | 1.92E-05 |
| Focal adhesion                                  | 33               | 58               | 1.52E-10 | 3.75E-10 | VEGF signaling pathway                             | 15               | 17               | 9.71E-06 | 2.36E-05 |
| Natural killer cell mediated cytotoxicity       | 26               | 32               | 2.9E-10  | 8.59E-10 | Insulin signaling pathway                          | 18               | 25               | 9.42E-06 | 3.5E-05  |
| Phosphatidylinositol signaling system           | 26               | 33               | 4.78E-10 | 9.18E-10 | T cell receptor signaling pathway                  | 16               | 20               | 1.19E-05 | 3.58E-05 |
| Progesterone-mediated oocyte maturation         | 28               | 31               | 5.06E-10 | 1.94E-09 | Cell cycle                                         | 12               | 21               | 2.53E-05 | 4.95E-05 |
| Regulation of actin cytoskeleton                | 30               | 47               | 5.91E-10 | 2.16E-09 | Regulation of actin cytoskeleton                   | 19               | 33               | 1.75E-05 | 6.38E-05 |
| Fc gamma R-mediated phagocytosis                | 26               | 30               | 4.69E-09 | 1.47E-08 | Leukocyte transendothelial migration               | 16               | 21               | 2.06E-05 | 6.55E-05 |
| Chemokine signaling pathway                     | 28               | 34               | 1.71E-07 | 3.26E-07 | Progesterone-mediated oocyte maturation            | 17               | 19               | 3.39E-05 | 0.00013  |
| Leukocyte transendothelial migration            | 25               | 29               | 1.35E-07 | 4.29E-07 | Chemokine signaling pathway                        | 18               | 24               | 9.52E-05 | 0.000181 |
| Jak-STAT signaling pathway                      | 27               | 31               | 1.71E-07 | 4.92E-07 | Inositol phosphate metabolism                      | 16               | 16               | 0.000193 | 0.000252 |
| MAPK signaling pathway                          | 21               | 33               | 0.000357 | 0.000657 | Focal adhesion                                     | 21               | 38               | 0.00011  | 0.00027  |
| Cell cycle                                      | 13               | 18               | 0.0037   | 0.007234 | MAPK signaling pathway                             | 20               | 30               | 0.001953 | 0.003594 |
| *GnRH signaling pathway                         | 10               | 17               | 0.002288 | 0.008637 | Phosphatidylinositol signaling system              | 17               | 17               | 0.00277  | 0.005321 |

|                                                      |    |    |          |          |                                                              |    |    |          |          |
|------------------------------------------------------|----|----|----------|----------|--------------------------------------------------------------|----|----|----------|----------|
| *Protein processing in endoplasmic reticulum         | 7  | 16 | 0.005747 | 0.011987 | Wnt signaling pathway                                        | 15 | 18 | 0.004688 | 0.010694 |
| RIG-I-like receptor signaling pathway                | 8  | 10 | 0.005919 | 0.016618 | **Ubiquitin mediated proteolysis                             | 11 | 17 | 0.012135 | 0.024381 |
| *Non-homologous end-joining                          | 5  | 6  | 0.012215 | 0.022292 | **Axon guidance                                              | 11 | 17 | 0.015777 | 0.037969 |
| Wnt signaling pathway                                | 14 | 18 | 0.011883 | 0.027108 | **Glycosaminoglycan biosynthesis - keratan sulfate           | 2  | 3  | 0.039696 | 0.050839 |
| *Ubiquinone and other terpenoid-quinone biosynthesis | 3  | 3  | 0.033653 | 0.035777 | **TGF-beta signaling pathway                                 | 6  | 9  | 0.026357 | 0.062741 |
| *Fatty acid biosynthesis                             | 3  | 4  | 0.042149 | 0.043541 | RIG-I-like receptor signaling pathway                        | 6  | 7  | 0.033013 | 0.09269  |
| *Protein digestion and absorption                    | 12 | 16 | 0.009906 | 0.05045  | **DNA replication                                            | 4  | 5  | 0.066204 | 0.112393 |
| *Neuroactive ligand-receptor interaction             | 16 | 23 | 0.026388 | 0.051141 | **Glycosphingolipid biosynthesis - lacto and neolacto series | 2  | 3  | 0.09023  | 0.123502 |
| *Tight junction                                      | 10 | 17 | 0.02306  | 0.059413 | **Galactose metabolism                                       | 4  | 4  | 0.12658  | 0.129537 |
| *Nucleotide excision repair                          | 6  | 7  | 0.043346 | 0.077177 | Mismatch repair                                              | 4  | 4  | 0.083318 | 0.149563 |
| *Spliceosome                                         | 9  | 12 | 0.054089 | 0.092543 |                                                              |    |    |          |          |
| *Glycine, serine and threonine metabolism            | 2  | 4  | 0.1176   | 0.129419 |                                                              |    |    |          |          |
| *Homologous recombination                            | 3  | 5  | 0.071767 | 0.129892 |                                                              |    |    |          |          |

### Supplementary Table 16: Pathway responder vs non-responder

Significantly altered pathways were also identified by PathScan among responders versus non-responders. The response is based on surgical Ki67 levels. KEGG cancer pathways were removed, as discussed in methods. \*Significantly mutated only among AI Responders, \*\*Significantly mutated only among AI Nonresponders.

| Map                                                                                                      | p value  | mutated objects | total objects |
|----------------------------------------------------------------------------------------------------------|----------|-----------------|---------------|
| Development_Neurotrophin family signaling                                                                | 3.38E-08 | 15              | 40            |
| Neurophysiological process_ACM regulation of nerve impulse                                               | 2.89E-07 | 15              | 46            |
| DNA damage_Role of Brca1 and Brca2 in DNA repair                                                         | 3.57E-07 | 12              | 30            |
| Cell cycle_Influence of Ras and Rho proteins on G1/S Transition                                          | 3.84E-07 | 16              | 53            |
| Cytoskeleton remodeling_Cytoskeleton remodeling                                                          | 4.36E-07 | 23              | 102           |
| Development_Melanocyte development and pigmentation                                                      | 7.28E-07 | 15              | 49            |
| Development_Gastrin in cell growth and proliferation                                                     | 7.67E-07 | 17              | 62            |
| Development_WNT signaling pathway. Part 2                                                                | 2.22E-06 | 15              | 53            |
| Development_EGFR signaling pathway                                                                       | 4.88E-06 | 16              | 63            |
| Development_Flt3 signaling                                                                               | 6.26E-06 | 13              | 44            |
| Transcription_P53 signaling pathway                                                                      | 8.95E-06 | 12              | 39            |
| DNA damage_Role of NFB1 in DNA damage response                                                           | 9.82E-06 | 7               | 13            |
| Translation_Non-genomic (rapid) action of Androgen Receptor                                              | 1.20E-05 | 12              | 40            |
| Development_HGF signaling pathway                                                                        | 1.39E-05 | 13              | 47            |
| Cell adhesion_Chemokines and adhesion                                                                    | 1.69E-05 | 20              | 100           |
| Muscle contraction_ACM regulation of smooth muscle contraction                                           | 2.32E-05 | 14              | 56            |
| Development_Beta-adrenergic receptors transactivation of EGFR                                            | 3.05E-05 | 11              | 37            |
| Neurophysiological process_NMDA-dependent postsynaptic long-term potentiation in CA1 hippocampal neurons | 3.19E-05 | 17              | 80            |
| Transcription_Androgen Receptor nuclear signaling                                                        | 4.45E-05 | 12              | 45            |
| Development_Thrombopoietin-regulated cell processes                                                      | 4.45E-05 | 12              | 45            |
| Translation_Regulation of EIF4F activity                                                                 | 5.63E-05 | 13              | 53            |
| Signal transduction_PTEN pathway                                                                         | 5.64E-05 | 12              | 46            |
| G-protein signaling_Regulation of CDC42 activity                                                         | 5.86E-05 | 10              | 33            |
| Development_SSTR2 in regulation of cell proliferation                                                    | 0.000133 | 10              | 36            |
| DNA damage_Brca1 as a transcription regulator                                                            | 0.00015  | 9               | 30            |
| Muscle contraction_GPCRs in the regulation of smooth muscle tone                                         | 0.000184 | 16              | 83            |
| DNA damage_NHEJ mechanisms of DSBs repair                                                                | 0.000198 | 7               | 19            |

|                                                                                                             |          |    |    |
|-------------------------------------------------------------------------------------------------------------|----------|----|----|
| <b>G-protein signaling_Proinsulin C-peptide signaling</b>                                                   | 0.000203 | 12 | 52 |
| <b>Development_VEGF signaling via VEGFR2 - generic cascades</b>                                             | 0.000213 | 16 | 84 |
| <b>Development_EPO-induced MAPK pathway</b>                                                                 | 0.000216 | 11 | 45 |
| <b>Development_Endothelin-1/EDNRA signaling</b>                                                             | 0.000246 | 12 | 53 |
| <b>Development_WNT5A signaling</b>                                                                          | 0.000266 | 11 | 46 |
| <b>G-protein signaling_Regulation of p38 and JNK signaling mediated by G-proteins</b>                       | 0.000274 | 10 | 39 |
| <b>Cell cycle_Regulation of G1/S transition (part 2)</b>                                                    | 0.00029  | 8  | 26 |
| <b>PGE2 pathways in cancer</b>                                                                              | 0.000355 | 12 | 55 |
| <b>Development_CNTF receptor signaling</b>                                                                  | 0.000427 | 9  | 34 |
| <b>Apoptosis and survival_Role of CDK5 in neuronal death and survival</b>                                   | 0.000427 | 9  | 34 |
| <b>Apoptosis and survival_Cytoplasmic/mitochondrial transport of proapoptotic proteins Bid, Bmf and Bim</b> | 0.000427 | 9  | 34 |
| <b>Development_Regulation of epithelial-to-mesenchymal transition (EMT)</b>                                 | 0.000429 | 13 | 64 |
| <b>Translation_Insulin regulation of translation</b>                                                        | 0.000523 | 10 | 42 |
| <b>Signal transduction_JNK pathway</b>                                                                      | 0.000523 | 10 | 42 |
| <b>Development_Growth hormone signaling via PI3K/AKT and MAPK cascades</b>                                  | 0.000523 | 10 | 42 |
| <b>Development_S1P3 receptor signaling pathway</b>                                                          | 0.000639 | 10 | 43 |
| <b>Apoptosis and survival_nAChR in apoptosis inhibition and cell cycle progression</b>                      | 0.00066  | 8  | 29 |
| <b>Apoptosis and survival_p53-dependent apoptosis</b>                                                       | 0.00066  | 8  | 29 |
| <b>Signal transduction_PKA signaling</b>                                                                    | 0.000688 | 11 | 51 |
| <b>Some pathways of EMT in cancer cells</b>                                                                 | 0.000688 | 11 | 51 |
| <b>Development_Slit-Robo signaling</b>                                                                      | 0.000845 | 8  | 30 |
| <b>Development_Ligand-independent activation of ESR1 and ESR2</b>                                           | 0.000936 | 10 | 45 |
| <b>Transport_RAN regulation pathway</b>                                                                     | 0.001064 | 6  | 18 |
| <b>Development_FGFR signaling pathway</b>                                                                   | 0.001141 | 11 | 54 |
| <b>Development_ERBB-family signaling</b>                                                                    | 0.001258 | 9  | 39 |
| <b>G-protein signaling_K-RAS regulation pathway</b>                                                         | 0.001304 | 7  | 25 |
| <b>Cell cycle_Initiation of mitosis</b>                                                                     | 0.001304 | 7  | 25 |



|                                                                             |          |    |    |
|-----------------------------------------------------------------------------|----------|----|----|
| <b>Regulation of lipid metabolism_Insulin signaling:generic cascades</b>    | 0.001337 | 10 | 47 |
| <b>Development_PIP3 signaling in cardiac myocytes</b>                       | 0.001337 | 10 | 47 |
| <b>Development_PDGF signaling via MAPK cascades</b>                         | 0.001337 | 10 | 47 |
| <b>Apoptosis and survival_Granzyme B signaling</b>                          | 0.00134  | 8  | 32 |
| <b>Cell cycle_Role of Nek in cell cycle regulation</b>                      | 0.00134  | 8  | 32 |
| <b>Cell cycle_Start of DNA replication in early S phase</b>                 | 0.00134  | 8  | 32 |
| <b>Muscle contraction_Regulation of eNOS activity in endothelial cells</b>  | 0.001483 | 12 | 64 |
| <b>Apoptosis and survival_Ceramides signaling pathway</b>                   | 0.001524 | 9  | 40 |
| <b>Development_S1P1 receptor signaling via beta-arrestin</b>                | 0.001661 | 8  | 33 |
| <b>Development_EGFR signaling via small GTPases</b>                         | 0.001661 | 8  | 33 |
| <b>G-protein signaling_Ras family GTPases in kinase cascades (scheme)</b>   | 0.001678 | 7  | 26 |
| <b>Development_A3 receptor signaling</b>                                    | 0.001868 | 10 | 49 |
| <b>Chemotaxis_CXCR4 signaling pathway</b>                                   | 0.002041 | 8  | 34 |
| <b>G-protein signaling_G-Protein alpha-i signaling cascades</b>             | 0.00213  | 7  | 27 |
| <b>Transcription_Role of Akt in hypoxia induced HIF1 activation</b>         | 0.00213  | 7  | 27 |
| <b>Apoptosis and survival_BAD phosphorylation</b>                           | 0.00219  | 9  | 42 |
| <b>Development_EDNRB signaling</b>                                          | 0.002192 | 10 | 50 |
| <b>Development_GM-CSF signaling</b>                                         | 0.002192 | 10 | 50 |
| <b>Development_A2B receptor: action via G-protein alpha s</b>               | 0.002192 | 10 | 50 |
| <b>Cell cycle_Cell cycle (generic schema)</b>                               | 0.002592 | 6  | 21 |
| <b>Cell cycle_Chromosome condensation in prometaphase</b>                   | 0.002592 | 6  | 21 |
| <b>Development_ACM2 and ACM4 activation of ERK</b>                          | 0.002601 | 9  | 43 |
| <b>Development_EPO-induced PI3K/AKT pathway and Ca(2+) influx</b>           | 0.002601 | 9  | 43 |
| <b>Development_Angiotensin signaling via PYK2</b>                           | 0.002601 | 9  | 43 |
| <b>Development_VEGF signaling and activation</b>                            | 0.002601 | 9  | 43 |
| <b>Apoptosis and survival_TNFR1 signaling pathway</b>                       | 0.002601 | 9  | 43 |
| <b>Apoptosis and survival_DNA-damage-induced apoptosis</b>                  | 0.00283  | 5  | 15 |
| <b>Signal transduction_Activation of PKC via G-Protein coupled receptor</b> | 0.002972 | 10 | 52 |
| <b>Development_FGF-family signaling</b>                                     | 0.002972 | 10 | 52 |
| <b>Development_Membrane-bound ESR1: interaction with growth factors</b>     | 0.003603 | 9  | 45 |

|                                                                                                           |          |    |    |
|-----------------------------------------------------------------------------------------------------------|----------|----|----|
| <b>signaling</b>                                                                                          |          |    |    |
| Cell adhesion_Ephrin signaling                                                                            | 0.003603 | 9  | 45 |
| Development_Role of HDAC and calcium/calmodulin-dependent kinase (CaMK) in control of skeletal myogenesis | 0.003961 | 10 | 54 |
| Translation_Regulation of EIF2 activity                                                                   | 0.005065 | 8  | 39 |
| Cytoskeleton remodeling_FAK signaling                                                                     | 0.005911 | 10 | 57 |
| Signal transduction_IP3 signaling                                                                         | 0.006499 | 9  | 49 |
| Apoptosis and survival_Caspase cascade                                                                    | 0.007092 | 7  | 33 |
| Development_Activation of astroglial cells proliferation by ACM3                                          | 0.007092 | 7  | 33 |
| Cell cycle_ESR1 regulation of G1/S transition                                                             | 0.007092 | 7  | 33 |
| Signal transduction_Erk Interactions: Inhibition of Erk                                                   | 0.008401 | 7  | 34 |
| G-protein signaling_RhoA regulation pathway                                                               | 0.008401 | 7  | 34 |
| Regulation of metabolism_Role of Adiponectin in regulation of metabolism                                  | 0.009318 | 8  | 43 |
| Signal transduction_AKT signaling                                                                         | 0.009318 | 8  | 43 |
| Development_A2A receptor signaling                                                                        | 0.009318 | 8  | 43 |
| Development_IGF-1 receptor signaling                                                                      | 0.009647 | 9  | 52 |
| Translation_Regulation of translation initiation                                                          | 0.009856 | 6  | 27 |
| Development_EPO-induced Jak-STAT pathway                                                                  | 0.00988  | 7  | 35 |
| Cell cycle_The metaphase checkpoint                                                                       | 0.01154  | 7  | 36 |
| Immune response_Innate immune response to RNA viral infection                                             | 0.01182  | 6  | 28 |
| Development_G-Proteins mediated regulation MAPK-ERK signaling                                             | 0.01393  | 8  | 46 |
| Development_TGF-beta-dependent induction of EMT via RhoA, PI3K and ILK.                                   | 0.01393  | 8  | 46 |

---

**Supplementary Table 17: Metacore map network p-values.**

| <b>Gene</b>                     | <b>Mutation</b>                               | <b>Domain</b>         | <b>Patient</b>    | <b>Candidate Drugs</b>                                          |
|---------------------------------|-----------------------------------------------|-----------------------|-------------------|-----------------------------------------------------------------|
| <i>Tyrosine Kinases</i>         |                                               |                       |                   |                                                                 |
| <b>Her2 (ERBB2)</b>             | V777L                                         | KD                    | BRC14             | Lapatinib, Trastuzumab                                          |
|                                 | 755-759 <sup>LRENT</sup> in frame deletion    | KD                    | 16757             |                                                                 |
| <b>KIT</b>                      | Q152L                                         | EC                    | BRC33             | Imatinib, Masitinib (AB1010)                                    |
|                                 | R281K                                         | EC                    | BRC39             |                                                                 |
|                                 | M541L                                         | TM                    | 18115             |                                                                 |
| <b>PDGFRA</b>                   | E279K                                         | EC                    | BRC50             |                                                                 |
|                                 | E924K                                         | KD                    | BRC31             |                                                                 |
|                                 | e12+1                                         | JM/KD                 | 16825             |                                                                 |
| <b>DDR1</b>                     | A829V                                         | KD                    | BRC20             | Imatinib, Nilotinib, and Bafetinib (INNO-406)                   |
|                                 | R611C                                         | KD                    | 17733             |                                                                 |
| <b>DDR2</b>                     | E583D                                         | KD                    | CSB22             |                                                                 |
| <b>MET</b>                      | T263M                                         | EC                    | BRC20             | Foretinib, Tivantinib (ARQ 197), MetMAb (PRO143966), and others |
|                                 | I316M                                         | EC                    | 18115             |                                                                 |
|                                 | D864N                                         | EC                    | 17818             |                                                                 |
|                                 | E1275*                                        | KD                    | 16744             |                                                                 |
| <b>JAK1</b>                     | F1134L                                        | KD                    | 17327             | ruxolitinib (INCB018424 or INC424)                              |
|                                 | E637K                                         | Pseudo-kinase         | 17787             |                                                                 |
| <b>CSF1R</b>                    | D735H                                         | KD                    | BRC13             | Imatinib, Nilotinib, and Sunitinib                              |
|                                 | M875L                                         | KD                    | 17066             |                                                                 |
|                                 | H506P                                         | EC                    | 17807             |                                                                 |
|                                 | R378H                                         | EC                    | 16751             |                                                                 |
|                                 | R142H                                         | EC                    | 17881             |                                                                 |
| <b>LTK</b>                      | W391R                                         | EC                    | CSB7              | Crizotinib                                                      |
|                                 | W391R                                         | EC                    | 15980             |                                                                 |
|                                 | E399K                                         | EC                    | 16189             |                                                                 |
|                                 | M460I                                         | JM                    | 16189             |                                                                 |
| <i>Raf mutations</i>            |                                               |                       |                   |                                                                 |
| <b>BRAF</b>                     | K601E                                         | KD                    | BRC15             | vemurafenib                                                     |
|                                 | G104W                                         | na                    | CSB2              |                                                                 |
| <i>PI3-kinase / AKT pathway</i> |                                               |                       |                   |                                                                 |
| <b>PIK3CA</b>                   | Most common mutations at codons 542,545, 1047 | Helical and catalytic | Multiple patients | BKM120, GDC-0941, and others                                    |
| <b>AKT1</b>                     | C77F                                          | PH                    | CSB25             | MK2206 and others                                               |
| <b>AKT2</b>                     | S11F                                          | PH                    | BRC21             |                                                                 |
| <b>RPS6KB1 (S6 kinase)</b>      | S375F                                         | KD                    | BRC44             | PF-4708671 (in pre-clinical only)                               |

KD=kinase domain, EC=extracellular domain, TM=transmembrane, JM juxtamembrane, PH = pleckstrin homology, na=outside a known domain

**Supplementary Table 18. Druggable mutations with Tyrosine Kinase inhibitors**

| UPN   | ARID1A   | ARID2    | ARID3B  | ARID4B | JARID1B          | JARID1C | JMJD2A  | MLL2      | MLL3      | MLL5     | MYST1   | MYST3   | MYST4   | SETDB1  | UTX      |
|-------|----------|----------|---------|--------|------------------|---------|---------|-----------|-----------|----------|---------|---------|---------|---------|----------|
| BRC4  | -        | -        | Del     | -      | -                | -       | -       | -         | -         | -        | -       | -       | -       | -       | -        |
| BRC10 | -        | Del      | -       | -      | -                | -       | -       | Del       | -         | -        | -       | -       | -       | -       | -        |
| BRC11 | p.A1239T | -        | -       | Del    | p.R119S, Complex | -       | -       | -         | -         | -        | -       | -       | -       | Complex | -        |
| BRC13 | -        | -        | -       | -      | p.R1453K         | -       | -       | -         | -         | -        | -       | -       | -       | -       | -        |
| BRC15 | -        | p.S742fs | -       | -      | -                | -       | -       | -         | -         | -        | -       | -       | -       | -       | -        |
| BRC16 | -        | -        | -       | -      | -                | -       | -       | -         | -         | -        | -       | -       | -       | Complex | -        |
| BRC17 | -        | -        | -       | -      | -                | -       | -       | -         | -         | -        | -       | CTX     | -       | -       | -        |
| BRC18 | p.R1989* | -        | -       | -      | -                | p.F697S | -       | -         | -         | -        | -       | -       | -       | -       | -        |
| BRC19 | -        | -        | -       | -      | -                | -       | -       | p.Q356*   | -         | -        | -       | -       | -       | -       | -        |
| BRC21 | -        | -        | -       | -      | -                | -       | -       | -         | p.T1118fs | -        | -       | -       | -       | -       | -        |
| BRC29 | -        | -        | -       | -      | -                | -       | -       | -         | -         | -        | -       | -       | -       | -       | p.S1068* |
| BRC3  | -        | -        | -       | -      | -                | -       | -       | -         | p.I2391fs | -        | -       | -       | -       | -       | -        |
| BRC32 | -        | -        | -       | -      | -                | -       | -       | p.P4380fs | -         | -        | -       | -       | -       | -       | -        |
| BRC39 | -        | -        | -       | -      | -                | -       | -       | -         | -         | -        | p.R377Q | -       | -       | -       | -        |
| BRC41 | -        | -        | -       | -      | -                | -       | -       | -         | -         | Del      | -       | -       | -       | Complex | -        |
| BRC42 | -        | -        | p.Y295F | -      | -                | -       | -       | -         | -         | -        | -       | -       | -       | -       | -        |
| BRC44 | -        | -        | -       | -      | -                | -       | -       | -         | -         | -        | Complex | -       | p.S975F | -       | -        |
| BRC47 | -        | -        | -       | -      | -                | -       | -       | -         | -         | -        | -       | Complex | -       | -       | -        |
| BRC49 | -        | -        | -       | -      | -                | -       | -       | -         | -         | -        | -       | Complex | -       | -       | -        |
| BRC5  | -        | -        | -       | -      | -                | -       | p.V680A | -         | -         | -        | -       | -       | -       | -       | -        |
| BRC51 | -        | -        | -       | -      | -                | -       | -       | -         | -         | Del      | -       | -       | -       | -       | -        |
| BRC52 | -        | -        | -       | -      | -                | -       | -       | -         | -         | -        | -       | Del     | -       | -       | -        |
| BRC6  | -        | -        | -       | -      | -                | -       | -       | -         | p.R4139*  | -        | -       | Complex | -       | Complex | -        |
| BRC9  | -        | -        | -       | -      | -                | -       | -       | -         | -         | p.M1108T | -       | -       | -       | -       | -        |

**Supplementary Table 19. Histone modification.** Validated nonsynonymous somatic mutations and structural variants identified in genes related to histone modification from 46 cases with whole genome sequence data. Selected genes include histone methyltransferase, demethylase, and acetyltransferases.

| PARADIGM SubNetwork <sup>a</sup>                     | MetaCore Map ID <sup>b</sup> | -log <sub>10</sub> P-val <sup>c</sup> | Gene Overlap <sup>d</sup> | Size PARADIGM <sup>e</sup> | Size Metacore <sup>f</sup> |
|------------------------------------------------------|------------------------------|---------------------------------------|---------------------------|----------------------------|----------------------------|
| GMCSF-mediated signaling events                      | 175                          | 15.8                                  | 8                         | 12                         | 31                         |
| BARD1 signaling events                               | 4                            | 14.5                                  | 7                         | 9                          | 31                         |
| ErbB2/ErbB3 signaling events                         | 76                           | 14.3                                  | 8                         | 12                         | 45                         |
| Mitotic Prometaphase                                 | 178                          | 14.3                                  | 8                         | 15                         | 34                         |
| mTOR signaling pathway                               | 55                           | 14.0                                  | 9                         | 16                         | 59                         |
| Fc-epsilon receptor I signaling in mast cells        | 108                          | 13.4                                  | 8                         | 13                         | 51                         |
| IL2-mediated signaling events                        | 108                          | 13.4                                  | 8                         | 13                         | 51                         |
| Insulin Pathway                                      | 82                           | 13.3                                  | 7                         | 7                          | 72                         |
| Regulation of nuclear SMAD2/3 signaling              | 190                          | 12.8                                  | 12                        | 31                         | 108                        |
| PDGFR-beta signaling pathway                         | 108                          | 12.2                                  | 9                         | 26                         | 51                         |
| BCR signaling pathway                                | 58                           | 12.0                                  | 8                         | 18                         | 50                         |
| Activation of mRNA                                   | 55                           | 11.9                                  | 6                         | 6                          | 59                         |
| E2F transcription factor network                     | 32                           | 11.9                                  | 7                         | 28                         | 18                         |
| ErbB1 downstream signaling                           | 108                          | 11.9                                  | 8                         | 18                         | 51                         |
| Ras signaling in the CD4+ TCR pathway                | 92                           | 11.6                                  | 5                         | 5                          | 29                         |
| Regulation of retinoblastoma protein                 | 12                           | 11.5                                  | 8                         | 26                         | 38                         |
| Presenilin action in Notch and Wnt signaling         | 9                            | 11.3                                  | 9                         | 25                         | 66                         |
| Signaling by Stem cell factor receptor (c-Kit)       | 40                           | 11.3                                  | 8                         | 12                         | 103                        |
| Trk receptor signaling mediated by the MAPK pathway  | 92                           | 11.3                                  | 6                         | 11                         | 29                         |
| Ribosomal scanning and start codon recognition       | 55                           | 11.1                                  | 6                         | 7                          | 59                         |
| Cyclin A/B1 associated events during G2/M transition | 79                           | 11.1                                  | 6                         | 8                          | 48                         |
| Endothelins                                          | 116                          | 11.0                                  | 6                         | 9                          | 41                         |
| FOXM1 transcription factor network                   | All                          | 10.7                                  | 25                        | 31                         | 1288                       |
| Nongenotropic Androgen signaling                     | 116                          | 10.6                                  | 6                         | 10                         | 41                         |
| Translation initiation complex formation             | 55                           | 10.5                                  | 6                         | 8                          | 59                         |
| ATM mediated phosphorylation of repair proteins      | 13                           | 10.4                                  | 4                         | 5                          | 11                         |
| Neurotrophic factor-mediated Trk receptor signaling  | 2                            | 10.3                                  | 6                         | 10                         | 46                         |
| CXCR3-mediated signaling events                      | 92                           | 10.2                                  | 5                         | 7                          | 29                         |
| HIF-2-alpha transcription factor network             | 105                          | 10.1                                  | 7                         | 22                         | 39                         |
| EPO signaling pathway                                | 175                          | 10.1                                  | 5                         | 7                          | 31                         |

|                                                    |     |      |     |      |      |
|----------------------------------------------------|-----|------|-----|------|------|
| Ceramide signaling pathway                         | 76  | 10.0 | 6   | 11   | 45   |
| FGF signaling pathway                              | 108 | 10.0 | 6   | 10   | 51   |
| GTP hydrolysis of the 60S ribosomal subunit        | 55  | 10.0 | 6   | 9    | 59   |
| Regulation of Telomerase                           | 32  | 10.0 | 6   | 26   | 18   |
| VEGFR3 signaling in lymphatic endothelium          | 126 | 10.0 | 5   | 6    | 41   |
| Cyclin D associated events in G1                   | 160 | 9.9  | 5   | 7    | 33   |
| L13a-mediated silencing of Ceruloplasmin           | 55  | 9.6  | 6   | 10   | 59   |
| Hypoxic and oxygen regulation of HIF-1-alpha       | 105 | 9.6  | 5   | 7    | 39   |
| Signaling mediated by HGFR (c-Met)                 | 55  | 9.5  | 7   | 18   | 59   |
| ATR signaling pathway                              | 118 | 9.4  | 5   | 15   | 17   |
| Noncanonical Wnt signaling pathway                 | 9   | 9.3  | 6   | 10   | 66   |
| Signaling events regulated by Ret tyrosine kinase  | 109 | 9.3  | 5   | 5    | 78   |
| Signaling events mediated by VEGFR1 and VEGFR2     | 39  | 9.3  | 8   | 16   | 122  |
| Angiopoietin receptor Tie2-mediated signaling      | 11  | 9.2  | 6   | 12   | 55   |
| IFN-gamma pathway                                  | 126 | 9.0  | 5   | 8    | 41   |
| Regulation of Androgen receptor activity           | 190 | 8.8  | 8   | 20   | 108  |
| Downstream signaling in naive CD8+ T cells         | 92  | 8.7  | 5   | 12   | 29   |
| Meiotic Recombination                              | 4   | 8.3  | 5   | 13   | 31   |
| IGF1 pathway                                       | 49  | 8.3  | 4   | 5    | 33   |
| PathMarkResponseAll                                | All | 8.3  | 418 | 1451 | 1288 |
| EGF receptor (ErbB1) signaling pathway             | 91  | 8.2  | 4   | 5    | 35   |
| HIV-1 Nef: Negative effector of Fas and TNF-alpha  | 117 | 8.1  | 4   | 5    | 37   |
| ATF-2 transcription factor network                 | 190 | 8.1  | 7   | 16   | 108  |
| Signaling events mediated by focal adhesion kinase | 24  | 8.1  | 5   | 9    | 54   |
| Notch-mediated HES/HEY network                     | 12  | 8.0  | 6   | 25   | 38   |
| IL6-mediated signaling events                      | 58  | 7.9  | 5   | 10   | 50   |
| Caspase cascade in apoptosis                       | 84  | 7.9  | 4   | 6    | 31   |
| a6b1 and a6b4 Integrin signaling                   | 76  | 7.9  | 5   | 11   | 45   |
| TRKR signaling mediated by PI3K and PLC-gamma      | 108 | 7.9  | 5   | 10   | 51   |
| Signaling events mediated by PTP1B                 | 65  | 7.8  | 6   | 21   | 49   |
| ModulatedAll <sup>9</sup>                          | 32  | 7.7  | 13  | 742  | 18   |
| Integrins in angiogenesis                          | 39  | 7.7  | 6   | 10   | 122  |
| Internalization of ErbB1                           | 91  | 7.7  | 4   | 6    | 35   |
| AP-1 transcription factor network                  | 190 | 7.6  | 7   | 18   | 108  |

|                                                       |                  |     |    |    |      |
|-------------------------------------------------------|------------------|-----|----|----|------|
| Retinoic acid receptors-mediated signaling            | 70               | 7.6 | 5  | 10 | 59   |
| TGF-beta receptor signaling                           | 65               | 7.5 | 5  | 12 | 49   |
| Signaling events mediated by TCPTP                    | All <sup>h</sup> | 7.5 | 17 | 21 | 1288 |
| HIF-1-alpha transcription factor network              | 105              | 7.3 | 7  | 51 | 39   |
| Class I PI3K signaling events mediated by Akt         | 173              | 7.3 | 5  | 11 | 58   |
| Beta1 integrin cell surface interactions              | 16               | 7.2 | 5  | 6  | 144  |
| ErbB4 signaling events                                | 76               | 7.1 | 5  | 15 | 45   |
| Plasma membrane estrogen receptor signaling           | 126              | 7.1 | 4  | 7  | 41   |
| S1P1 pathway                                          | 116              | 7.1 | 4  | 7  | 41   |
| Cyclin A:Cdk2-associated events at S phase entry      | 111              | 7.0 | 3  | 7  | 9    |
| Signal transduction by L1                             | 90               | 7.0 | 4  | 6  | 53   |
| CDC42 signaling events                                | 92               | 6.9 | 4  | 10 | 29   |
| Calcineurin-dependent NFAT signaling in lymphocytes   | 190              | 6.9 | 6  | 14 | 108  |
| FOXA1 transcription factor network                    | 190              | 6.7 | 8  | 34 | 108  |
| IL3-mediated signaling events                         | 175              | 6.6 | 4  | 11 | 31   |
| PLK1 signaling events                                 | 79               | 6.5 | 5  | 18 | 48   |
| p73 transcription factor network                      | 190              | 6.5 | 7  | 25 | 108  |
| Regulation of SMAD2/3 signaling                       | 71               | 6.5 | 3  | 5  | 19   |
| Insulin-mediated glucose transport                    | 82               | 6.4 | 4  | 6  | 72   |
| Validated targets of C-MYC transcriptional repression | 190              | 6.4 | 8  | 37 | 108  |
| Deadenylation of mRNA                                 | 55               | 6.4 | 4  | 7  | 59   |
| p53 pathway                                           | 12               | 6.3 | 5  | 24 | 38   |
| Aurora A signaling                                    | All              | 6.3 | 10 | 10 | 1288 |
| Aurora B signaling                                    | 178              | 6.2 | 4  | 12 | 34   |
| Signaling events mediated by HDAC Class I             | 12               | 6.2 | 4  | 11 | 38   |

<sup>a</sup>Name of the constituent sub-network from the PARADIGM SuperPathway,

<sup>b</sup>Identifier for the GeneGO MetaCore map.

<sup>c</sup>The negative base-10 logarithm of the P-value associated with the hypergeometric test to gauge the significance of the overlap between the PARADIGM sub-network and the MetaCore map. A background set of 5541 genes was assumed, which was the size of the SuperPathway.

<sup>d</sup>The number of genes in common between a sub-network and a map.

<sup>e</sup>Number of modulated genes in the PARADIGM sub-network.

<sup>f</sup>Number of genes returned in the map from the MetaCore analysis.

<sup>g</sup>ModulatedAll is the set of all modulated PARADIGM sub-networks merged into a single gene list.

<sup>h</sup>All is the set of all GeneGO MetaCore genes across all maps merged into a single gene list.

**Supplementary Table 20:** Overlap statistics of all PARADIGM sub-networks matching to at least one GeneGO MetaCore map and vice versa (all maps matching to at least one PARADIGM sub-network).

## E. Supplementary References

- 1 Mardis, E. R. *et al.* Recurring mutations found by sequencing an acute myeloid leukemia genome. *N Engl J Med* **361**, 1058-1066, doi:NEJMoa0903840 [pii]10.1056/NEJMoa0903840 (2009).
- 2 Gnirke, A. *et al.* Solution hybrid selection with ultra-long oligonucleotides for massively parallel targeted sequencing. *Nat Biotechnol* **27**, 182-189, doi:nbt.1523 [pii]10.1038/nbt.1523 (2009).
- 3 Getz, G. *et al.* Comment on "The consensus coding sequences of human breast and colorectal cancers". *Science* **317**, 1500 (2007).
- 4 Li, H. *et al.* The Sequence Alignment/Map format and SAMtools. *Bioinformatics* **25**, 2078-2079 (2009).
- 5 McKenna, A. H. *et al.* The Genome Analysis Toolkit: A MapReduce framework for analyzing next-generation DNA sequencing data. *Genome Res.*
- 6 Ding, L. *et al.* Genome remodelling in a basal-like breast cancer metastasis and xenograft. *Nature* **464**, 999-1005, doi:10.1038/nature08989 (2010).
- 7 McKenna, A. *et al.* The Genome Analysis Toolkit: a MapReduce framework for analyzing next-generation DNA sequencing data. *Genome Res* **20**, 1297-1303, doi:gr.107524.110 [pii] 10.1101/gr.107524.110.
- 8 Ye, K., Schulz, M. H., Long, Q., Apweiler, R. & Ning, Z. Pindel: a pattern growth approach to detect break points of large deletions and medium sized insertions from paired-end short reads. *Bioinformatics* **25**, 2865-2871, doi:btp394 [pii]10.1093/bioinformatics/btp394 (2009).
- 9 Ley, T. J. *et al.* DNA sequencing of a cytogenetically normal acute myeloid leukaemia genome. *Nature* **456**, 66-72 (2008).
- 10 Chen, K. *et al.* BreakDancer: an algorithm for high-resolution mapping of genomic structural variation. *Nat Methods* **6**, 677-681, doi:nmeth.1363 [pii]10.1038/nmeth.1363 (2009).
- 11 Chen, L. TIGRA\_SV. [http://genome.wustl.edu/software/tigra\\_sv](http://genome.wustl.edu/software/tigra_sv) **Unpublished** (2011).
- 12 Dees, N. *et al.* Mutation Significance in Cancer (MuSiC) analysis package. <http://gmt.genome.wustl.edu/download/> **In Preparation** (2011).
- 13 Fisher, R. A. *Statistical Methods for Research Workers*. (Oliver and Boyd, 1925).
- 14 Vaske, C. J. *et al.* Inference of patient-specific pathway activities from multi-dimensional cancer genomics data using PARADIGM. *Bioinformatics* **26**, i237-245, doi:10.1093/bioinformatics/btq182 (2010).
- 15 Eisen, M. B., Spellman, P. T., Brown, P. O. & Botstein, D. Cluster analysis and display of genome-wide expression patterns. *Proc Natl Acad Sci U S A* **95**, 14863-14868 (1998).
- 16 Saldanha, A. J. Java Treeview--extensible visualization of microarray data. *Bioinformatics* **20**, 3246-3248, doi:10.1093/bioinformatics/bth349 (2004).



- 17 Parsons, D. W. *et al.* The genetic landscape of the childhood cancer medulloblastoma. *Science* **331**, 435-439, doi:10.1126/science.1198056 (2011).
- 18 Jones, S. *et al.* Frequent mutations of chromatin remodeling gene ARID1A in ovarian clear cell carcinoma. *Science* **330**, 228-231, doi:10.1126/science.1196333 (2010).
- 19 Monk, K. R., Oshima, K., Jors, S., Heller, S. & Talbot, W. S. Gpr126 is essential for peripheral nerve development and myelination in mammals. *Development*, doi:10.1242/dev.062224 (2011).
- 20 Howard, B., Panchal, H., McCarthy, A. & Ashworth, A. Identification of the scaramanga gene implicates Neuregulin3 in mammary gland specification. *Genes Dev* **19**, 2078-2090, doi:10.1101/gad.338505 (2005).
- 21 Howard, B. A. The role of NRG3 in mammary development. *Journal of mammary gland biology and neoplasia* **13**, 195-203, doi:10.1007/s10911-008-9082-8 (2008).
- 22 van Bon, B. W. *et al.* The phenotype of recurrent 10q22q23 deletions and duplications. *European journal of human genetics : EJHG* **19**, 400-408, doi:10.1038/ejhg.2010.211 (2011).
- 23 Haverty, P. M. *et al.* High-resolution genomic and expression analyses of copy number alterations in breast tumors. *Genes Chromosomes Cancer* **47**, 530-542, doi:10.1002/gcc.20558 (2008).
- 24 Zhang, Q. *et al.* CMDS: a population-based method for identifying recurrent DNA copy number aberrations in cancer from high-resolution data. *Bioinformatics* **26**, 464-469, doi:btp708 [pii]
- 25 Stephens, P. J. *et al.* Complex landscapes of somatic rearrangement in human breast cancer genomes. *Nature* **462**, 1005-1010, doi:10.1038/nature08645 (2009).
- 26 Prentice, L. M. *et al.* NRG1 gene rearrangements in clinical breast cancer: identification of an adjacent novel amplicon associated with poor prognosis. *Oncogene* **24**, 7281-7289, doi:10.1038/sj.onc.1208892 (2005).
- 27 Huang, H. E. *et al.* A recurrent chromosome breakpoint in breast cancer at the NRG1/neuregulin 1/hereregulin gene. *Cancer Res* **64**, 6840-6844, doi:10.1158/0008-5472.CAN-04-1762 (2004).
- 28 Ding, L. *et al.* Genome remodelling in a basal-like breast cancer metastasis and xenograft. *Nature* **464**, 999-1005, doi:10.1038/nature08989 (2010).
- 29 Barlund, M. *et al.* Cloning of BCAS3 (17q23) and BCAS4 (20q13) genes that undergo amplification, overexpression, and fusion in breast cancer. *Genes Chromosomes Cancer* **35**, 311-317, doi:10.1002/gcc.10121 (2002).
- 30 Lin, L. *et al.* Multiple forms of genetic instability within a 2-Mb chromosomal segment of 3q26.3-q27 are associated with development of esophageal adenocarcinoma. *Genes Chromosomes Cancer* **45**, 319-331, doi:10.1002/gcc.20293 (2006).
- 31 Gururaj, A. E., Holm, C., Landberg, G. & Kumar, R. Breast cancer-amplified sequence 3, a target of metastasis-associated protein 1, contributes to tamoxifen resistance in premenopausal patients with breast cancer. *Cell Cycle* **5**, 1407-1410 (2006).
